# Supplementary material for: Identification of Gene Biomarkers for Tigilanol Tiglate Content in Fontainea picrosperma
Source: Molecules. 2022 Jun 21;27(13):3980. doi: 10.3390/molecules27133980 (PMC9268252; doi:10.3390/molecules27133980)
Supplement: Supplementary file 1 [file molecules-27-03980-s001.zip]

Archive with 6 entries (6 files):
- Mitu et al_Supp File 1.xlsx
- Mitu et al_Supp File 2.xlsx
- Mitu et al_Supp File 3.xlsx
- Mitu et al_Supp File 4.pdf
- Mitu et al_Supp File 5.xlsx
- Mitu et al_Supp File 6.xlsx
