# Supplementary material for: Identification of Gene Biomarkers for Tigilanol Tiglate Content in Fontainea picrosperma
Source: Molecules. 2022 Jun 21;27(13):3980. doi: 10.3390/molecules27133980 (PMC9268252; doi:10.3390/molecules27133980)
Supplement: Supplementary file 1 [file molecules-27-03980-s001.zip › Mitu et al_Supp File 1.xlsx]

## Sheet: A
SeqName	Description	Length	#Hits	e-Value	sim mean	#GO	GO IDs	GO Names	Enzyme Codes	Enzyme Names	InterPro IDs	InterPro GO IDs	InterPro GO Names
TRINITY_DN83797_c5_g1_i2	RecName: Full=Protein UPSTREAM OF FLC	440	1	9.39986e-35	73.83	1	C:GO:0009925	C:basal plasma membrane			IPR010369 (PFAM); IPR021182 (PIRSF); mobidb-lite (MOBIDB_LITE); mobidb-lite (MOBIDB_LITE); mobidb-lite (MOBIDB_LITE); mobidb-lite (MOBIDB_LITE); IPR010369 (PANTHER); PTHR31083:SF4 (PANTHER)	no GO terms	no GO terms
TRINITY_DN89249_c0_g2_i3	RecName: Full=Putative nuclease HARBI1; AltName: Full=Harbinger transposase-derived nuclease	226	6	5.59563e-09	40.2	3	C:GO:0005829; C:GO:0005886; C:GO:0034451	C:cytosol; C:plasma membrane; C:centriolar satellite			IPR027806 (PFAM); PTHR22930 (PANTHER); PTHR22930:SF211 (PANTHER)	no GO terms	no GO terms
TRINITY_DN84668_c1_g3_i3	RecName: Full=TLC domain-containing protein 4; AltName: Full=Transmembrane protein 56	267	13	1.16589e-17	48.42	2	F:GO:0005515; C:GO:0016021	F:protein binding; C:integral component of membrane			IPR006634 (SMART); IPR006634 (PFAM); PTHR13439:SF54 (PANTHER); PTHR13439 (PANTHER); NON_CYTOPLASMIC_DOMAIN (PHOBIUS); TRANSMEMBRANE (PHOBIUS); CYTOPLASMIC_DOMAIN (PHOBIUS); TRANSMEMBRANE (PHOBIUS); TRANSMEMBRANE (PHOBIUS); TRANSMEMBRANE (PHOBIUS); TRANSMEMBRANE (PHOBIUS); NON_CYTOPLASMIC_DOMAIN (PHOBIUS); TRANSMEMBRANE (PHOBIUS); NON_CYTOPLASMIC_DOMAIN (PHOBIUS); CYTOPLASMIC_DOMAIN (PHOBIUS); TRA…	C:GO:0016021	C:integral component of membrane
TRINITY_DN79985_c0_g1_i5	RecName: Full=D-2-hydroxyglutarate dehydrogenase, mitochondrial; Flags: Precursor	498	20	0	54.39	33	P:GO:0006103; P:GO:0006754; P:GO:0006974; P:GO:0008611; P:GO:0010042; P:GO:0010043; P:GO:0032025; P:GO:0032026; P:GO:0044267; P:GO:0046296; P:GO:0051592; P:GO:0051596; P:GO:0055114; P:GO:1903457; F:GO:0003779; F:GO:0004458; F:GO:0005524; F:GO:0008609; F:GO:0008720; F:GO:0008891; F:GO:0019154; F:GO:0042802; F:GO:0047545; F:GO:0047809; F:GO:0051990; F:GO:0071949; C:GO:0005743; C:GO:0005758; C:GO:00…	P:2-oxoglutarate metabolic process; P:ATP biosynthetic process; P:cellular response to DNA damage stimulus; P:ether lipid biosynthetic process; P:response to manganese ion; P:response to zinc ion; P:response to cobalt ion; P:response to magnesium ion; P:cellular protein metabolic process; P:glycolate catabolic process; P:response to calcium ion; P:methylglyoxal catabolic process; P:oxidation-redu…	EC:1.1.2.4; EC:1.1.99.39; EC:2.5.1.26; EC:1.1.3.15; EC:1.1.99.14; EC:1.1.99.6; EC:1.1.1.28; EC:1.1.99.2	D-lactate dehydrogenase (cytochrome); D-2-hydroxyglutarate dehydrogenase; Alkylglycerone-phosphate synthase; (S)-2-hydroxy-acid oxidase; Glycolate dehydrogenase; D-lactate dehydrogenase (acceptor); D-lactate dehydrogenase; L-2-hydroxyglutarate dehydrogenase	IPR004113 (PFAM); IPR006094 (PFAM); G3DSA:3.30.465.40 (GENE3D); PTHR11748 (PANTHER); PTHR11748:SF111 (PANTHER); IPR016166 (PROSITE_PROFILES); IPR016164 (SUPERFAMILY); IPR036318 (SUPERFAMILY)	P:GO:0055114; F:GO:0003824; F:GO:0016491; F:GO:0050660; F:GO:0071949	P:oxidation-reduction process; F:catalytic activity; F:oxidoreductase activity; F:flavin adenine dinucleotide binding; F:FAD binding
TRINITY_DN89745_c1_g2_i2	RecName: Full=IST1 homolog	515	7	1.04076e-20	59.71	22	P:GO:0009838; P:GO:0015031; P:GO:0019076; P:GO:0036258; P:GO:0043312; P:GO:0045862; P:GO:0046745; P:GO:0048672; P:GO:0061640; P:GO:1904903; F:GO:0042802; F:GO:0044877; F:GO:0090541; C:GO:0000785; C:GO:0005635; C:GO:0005768; C:GO:0005793; C:GO:0005813; C:GO:0005829; C:GO:0035578; C:GO:0070062; C:GO:0090543	P:abscission; P:protein transport; P:viral release from host cell; P:multivesicular body assembly; P:neutrophil degranulation; P:positive regulation of proteolysis; P:viral capsid secondary envelopment; P:positive regulation of collateral sprouting; P:cytoskeleton-dependent cytokinesis; P:ESCRT III complex disassembly; F:identical protein binding; F:protein-containing complex binding; F:MIT domai…			Coil (COILS); Coil (COILS); IPR042277 (G3DSA:1.20.1260.GENE3D); IPR005061 (PFAM); mobidb-lite (MOBIDB_LITE); mobidb-lite (MOBIDB_LITE); mobidb-lite (MOBIDB_LITE); mobidb-lite (MOBIDB_LITE); mobidb-lite (MOBIDB_LITE); mobidb-lite (MOBIDB_LITE); PTHR12161:SF62 (PANTHER); IPR005061 (PANTHER)	P:GO:0015031	P:protein transport
TRINITY_DN6084_c0_g1_i1	RecName: Full=MLP-like protein 31	114	16	4.62736e-27	54.02	7	P:GO:0002253; P:GO:0006952; P:GO:0009820; P:GO:0010043; F:GO:0016835; F:GO:0042803; C:GO:0009507	P:activation of immune response; P:defense response; P:alkaloid metabolic process; P:response to zinc ion; F:carbon-oxygen lyase activity; F:protein homodimerization activity; C:chloroplast			IPR000916 (SMART); IPR000916 (PFAM); IPR023393 (G3DSA:3.30.530.GENE3D); PTHR31907:SF4 (PANTHER); PTHR31907 (PANTHER); SSF55961 (SUPERFAMILY)	P:GO:0006952	P:defense response
TRINITY_DN91262_c0_g4_i2	RecName: Full=Mitogen-activated protein kinase kinase kinase 3; AltName: Full=MAPK/ERK kinase kinase 3; Short=MEK kinase 3; Short=MEKK 3	732	20	1.17451e-151	64.51	54	P:GO:0000186; P:GO:0000187; P:GO:0000915; P:GO:0000919; P:GO:0002221; P:GO:0006355; P:GO:0006979; P:GO:0009611; P:GO:0009631; P:GO:0009651; P:GO:0010098; P:GO:0010103; P:GO:0010229; P:GO:0010449; P:GO:0030435; P:GO:0030587; P:GO:0031028; P:GO:0040008; P:GO:0043123; P:GO:0043622; P:GO:0045088; P:GO:0046777; P:GO:0070498; P:GO:0071323; P:GO:0071864; P:GO:0090050; P:GO:0140281; P:GO:1900150; P:GO:19…	P:activation of MAPKK activity; P:activation of MAPK activity; P:actomyosin contractile ring assembly; P:cell plate assembly; P:pattern recognition receptor signaling pathway; P:regulation of transcription, DNA-templated; P:response to oxidative stress; P:response to wounding; P:cold acclimation; P:response to salt stress; P:suspensor development; P:stomatal complex morphogenesis; P:inflorescence…	EC:2.7.11.25; EC:2.7.11; EC:2.7.11.24	Mitogen-activated protein kinase kinase kinase; Transferring phosphorus-containing groups; Mitogen-activated protein kinase	IPR000719 (SMART); IPR000719 (PFAM); G3DSA:1.10.510.10 (GENE3D); G3DSA:3.30.200.20 (GENE3D); mobidb-lite (MOBIDB_LITE); mobidb-lite (MOBIDB_LITE); mobidb-lite (MOBIDB_LITE); mobidb-lite (MOBIDB_LITE); mobidb-lite (MOBIDB_LITE); mobidb-lite (MOBIDB_LITE); mobidb-lite (MOBIDB_LITE); mobidb-lite (MOBIDB_LITE); PTHR48016 (PANTHER); PTHR48016 (PANTHER); PTHR48016:SF12 (PANTHER); PTHR48016:SF12 (PANTHE…	P:GO:0006468; F:GO:0004672; F:GO:0005524	P:protein phosphorylation; F:protein kinase activity; F:ATP binding
TRINITY_DN90788_c8_g1_i2	RecName: Full=Vesicular inhibitory amino acid transporter; AltName: Full=GABA and glycine transporter; AltName: Full=Solute carrier family 32 member 1; AltName: Full=Vesicular GABA transporter	431	20	5.95147e-170	56.11	29	P:GO:0003333; P:GO:0006952; P:GO:0007034; P:GO:0007269; P:GO:0007568; P:GO:0015801; P:GO:0015812; P:GO:0015816; P:GO:0015824; P:GO:0021766; P:GO:0043090; P:GO:0080167; P:GO:0098700; F:GO:0005302; F:GO:0015186; F:GO:0015187; F:GO:0015188; F:GO:0015495; C:GO:0000329; C:GO:0005789; C:GO:0005887; C:GO:0030285; C:GO:0044292; C:GO:0044316; C:GO:0048786; C:GO:0051286; C:GO:0060077; C:GO:0061202; C:GO:00…	P:amino acid transmembrane transport; P:defense response; P:vacuolar transport; P:neurotransmitter secretion; P:aging; P:aromatic amino acid transport; P:gamma-aminobutyric acid transport; P:glycine transport; P:proline transport; P:hippocampus development; P:amino acid import; P:response to karrikin; P:neurotransmitter loading into synaptic vesicle; F:L-tyrosine transmembrane transporter activit…			IPR013057 (PFAM); PTHR48017:SF118 (PANTHER); PTHR48017 (PANTHER); NON_CYTOPLASMIC_DOMAIN (PHOBIUS); NON_CYTOPLASMIC_DOMAIN (PHOBIUS); NON_CYTOPLASMIC_DOMAIN (PHOBIUS); NON_CYTOPLASMIC_DOMAIN (PHOBIUS); TRANSMEMBRANE (PHOBIUS); TRANSMEMBRANE (PHOBIUS); CYTOPLASMIC_DOMAIN (PHOBIUS); TRANSMEMBRANE (PHOBIUS); TRANSMEMBRANE (PHOBIUS); TRANSMEMBRANE (PHOBIUS); CYTOPLASMIC_DOMAIN (PHOBIUS); CYTOPLASMIC_…	no GO terms	no GO terms
TRINITY_DN90788_c8_g1_i3	RecName: Full=Amino acid transporter AVT1J; Short=AtAvt1J	157	13	2.77609e-46	65.05	4	P:GO:0006865; C:GO:0005774; C:GO:0005886; C:GO:0016021	P:amino acid transport; C:vacuolar membrane; C:plasma membrane; C:integral component of membrane			IPR013057 (PFAM); PTHR48017 (PANTHER); PTHR48017:SF152 (PANTHER); TRANSMEMBRANE (PHOBIUS); TRANSMEMBRANE (PHOBIUS); NON_CYTOPLASMIC_DOMAIN (PHOBIUS); CYTOPLASMIC_DOMAIN (PHOBIUS); NON_CYTOPLASMIC_DOMAIN (PHOBIUS); TRANSMEMBRANE (PHOBIUS); CYTOPLASMIC_DOMAIN (PHOBIUS); TMhelix (TMHMM); TMhelix (TMHMM); TMhelix (TMHMM)	no GO terms	no GO terms
TRINITY_DN76702_c0_g3_i5	RecName: Full=Respiratory burst oxidase homolog protein B; AltName: Full=NADPH oxidase RBOHB; Short=OsrbohB	618	20	0	71.6	69	P:GO:0001525; P:GO:0002679; P:GO:0006590; P:GO:0006739; P:GO:0006811; P:GO:0006954; P:GO:0006979; P:GO:0007231; P:GO:0008217; P:GO:0009060; P:GO:0009408; P:GO:0009566; P:GO:0009615; P:GO:0009738; P:GO:0009845; P:GO:0009873; P:GO:0010053; P:GO:0010119; P:GO:0010575; P:GO:0016477; P:GO:0019221; P:GO:0030282; P:GO:0030435; P:GO:0030587; P:GO:0030878; P:GO:0033198; P:GO:0033500; P:GO:0035264; P:GO:00…	P:angiogenesis; P:respiratory burst involved in defense response; P:thyroid hormone generation; P:NADP metabolic process; P:ion transport; P:inflammatory response; P:response to oxidative stress; P:osmosensory signaling pathway; P:regulation of blood pressure; P:aerobic respiration; P:response to heat; P:fertilization; P:response to virus; P:abscisic acid-activated signaling pathway; P:seed germi…	EC:1.6.3.1; EC:1.11.1.7	NAD(P)H oxidase (H(2)O(2)-forming); Peroxidase	IPR000778 (PRINTS); IPR013130 (PFAM); G3DSA:2.40.30.10 (GENE3D); IPR039261 (G3DSA:3.40.50.GENE3D); IPR013121 (PFAM); IPR013112 (PFAM); PTHR11972 (PANTHER); PTHR11972:SF94 (PANTHER); TRANSMEMBRANE (PHOBIUS); TRANSMEMBRANE (PHOBIUS); TRANSMEMBRANE (PHOBIUS); CYTOPLASMIC_DOMAIN (PHOBIUS); CYTOPLASMIC_DOMAIN (PHOBIUS); CYTOPLASMIC_DOMAIN (PHOBIUS); NON_CYTOPLASMIC_DOMAIN (PHOBIUS); TRANSMEMBRANE (PHO…	P:GO:0055114; F:GO:0016491; C:GO:0016020	P:oxidation-reduction process; F:oxidoreductase activity; C:membrane
TRINITY_DN89717_c0_g3_i2	RecName: Full=Protein yippee-like 5	100	20	9.26703e-43	70.55	15	P:GO:0006915; P:GO:0007420; P:GO:0008283; P:GO:0043312; P:GO:2000774; F:GO:0005515; F:GO:0046872; C:GO:0000151; C:GO:0005576; C:GO:0005730; C:GO:0005813; C:GO:0030496; C:GO:0097431; C:GO:1904724; C:GO:1904813	P:apoptotic process; P:brain development; P:cell population proliferation; P:neutrophil degranulation; P:positive regulation of cellular senescence; F:protein binding; F:metal ion binding; C:ubiquitin ligase complex; C:extracellular region; C:nucleolus; C:centrosome; C:midbody; C:mitotic spindle pole; C:tertiary granule lumen; C:ficolin-1-rich granule lumen			IPR004910 (PFAM); PTHR13848:SF82 (PANTHER); IPR039058 (PANTHER); SIGNAL_PEPTIDE_C_REGION (PHOBIUS); TRANSMEMBRANE (PHOBIUS); SIGNAL_PEPTIDE_H_REGION (PHOBIUS); SIGNAL_PEPTIDE (PHOBIUS); NON_CYTOPLASMIC_DOMAIN (PHOBIUS); SIGNAL_PEPTIDE_N_REGION (PHOBIUS); CYTOPLASMIC_DOMAIN (PHOBIUS); IPR034751 (PROSITE_PROFILES); SignalP-noTM (SIGNALP_EUK)	no GO terms	no GO terms
TRINITY_DN90295_c0_g1_i4	RecName: Full=GPI transamidase component PIG-S; AltName: Full=Phosphatidylinositol-glycan biosynthesis class S protein	605	6	1.07956e-32	46.58	4	P:GO:0016255; F:GO:0003923; F:GO:0005515; C:GO:0042765	P:attachment of GPI anchor to protein; F:GPI-anchor transamidase activity; F:protein binding; C:GPI-anchor transamidase complex	EC:3.4.22; EC:3.4.22.1; EC:3.4.99; EC:3.4.22.41; EC:3.4.22.40; EC:3.4.22.34; EC:3.4.22.8; EC:3.4.22.28; EC:3.4.22.16; EC:3.4.22.27; EC:3.4.22.38; EC:3.4.22.15; EC:3.4.22.14	Acting on peptide bonds (peptidases); Cathepsin B; Acting on peptide bonds (peptidases); Cathepsin F; Bleomycin hydrolase; Legumain; Clostripain; Picornain 3C; Cathepsin H; Cathepsin S; Cathepsin K; Cathepsin L; Actinidain	IPR019540 (PFAM); mobidb-lite (MOBIDB_LITE); IPR019540 (PANTHER); CYTOPLASMIC_DOMAIN (PHOBIUS); TRANSMEMBRANE (PHOBIUS); TRANSMEMBRANE (PHOBIUS); NON_CYTOPLASMIC_DOMAIN (PHOBIUS); CYTOPLASMIC_DOMAIN (PHOBIUS); TMhelix (TMHMM); TMhelix (TMHMM)	P:GO:0016255; C:GO:0042765	P:attachment of GPI anchor to protein; C:GPI-anchor transamidase complex
TRINITY_DN87350_c0_g2_i1	RecName: Full=Terminal nucleotidyltransferase 4B; AltName: Full=Non-canonical poly(A) RNA polymerase PAPD5; AltName: Full=PAP-associated domain-containing protein 5; AltName: Full=Terminal guanylyltransferase; AltName: Full=Terminal uridylyltransferase 3; Short=TUTase 3; AltName: Full=Topoisomerase-related function protein 4-2; Short=TRF4-2	775	12	1.66819e-24	50.92	52	P:GO:0006284; P:GO:0006302; P:GO:0006364; P:GO:0006378; P:GO:0006400; P:GO:0007062; P:GO:0007076; P:GO:0007275; P:GO:0010587; P:GO:0031048; P:GO:0032211; P:GO:0033500; P:GO:0034475; P:GO:0042138; P:GO:0042493; P:GO:0043630; P:GO:0045910; P:GO:0051301; P:GO:0060212; P:GO:0071031; P:GO:0071035; P:GO:0071036; P:GO:0071037; P:GO:0071038; P:GO:0071039; P:GO:0071040; P:GO:0071042; P:GO:0071044; P:GO:00…	P:base-excision repair; P:double-strand break repair; P:rRNA processing; P:mRNA polyadenylation; P:tRNA modification; P:sister chromatid cohesion; P:mitotic chromosome condensation; P:multicellular organism development; P:miRNA catabolic process; P:heterochromatin assembly by small RNA; P:negative regulation of telomere maintenance via telomerase; P:carbohydrate homeostasis; P:U4 snRNA 3'-end pro…	EC:3.6.1.3; EC:3.6.4.13; EC:2.7.7.7; EC:2.7.7.19; EC:3.6.1.15	Adenosinetriphosphatase; RNA helicase; DNA-directed DNA polymerase; Polynucleotide adenylyltransferase; Nucleoside-triphosphate phosphatase	G3DSA:1.10.1410.10 (GENE3D); IPR043519 (G3DSA:3.30.460.GENE3D); IPR002934 (PFAM); mobidb-lite (MOBIDB_LITE); mobidb-lite (MOBIDB_LITE); mobidb-lite (MOBIDB_LITE); PTHR23092:SF48 (PANTHER); PTHR23092 (PANTHER); SSF81631 (SUPERFAMILY); IPR043519 (SUPERFAMILY)	F:GO:0016779	F:nucleotidyltransferase activity
TRINITY_DN80496_c0_g1_i1	RecName: Full=Uncharacterized protein At3g49140	345	1	3.49526e-11	49.25	3	P:GO:0008150; F:GO:0003674; C:GO:0005575	P:biological_process; F:molecular_function; C:cellular_component			mobidb-lite (MOBIDB_LITE); mobidb-lite (MOBIDB_LITE); PTHR13343 (PANTHER); PTHR13343:SF18 (PANTHER); SIGNAL_PEPTIDE_C_REGION (PHOBIUS); SIGNAL_PEPTIDE (PHOBIUS); SIGNAL_PEPTIDE_H_REGION (PHOBIUS); SIGNAL_PEPTIDE_N_REGION (PHOBIUS); NON_CYTOPLASMIC_DOMAIN (PHOBIUS)	no GO terms	no GO terms
TRINITY_DN58270_c0_g2_i1	RecName: Full=Protein BIC1; AltName: Full=BLUE-LIGHT INHIBITOR OF CRYPTOCHROMES 1	154	2	1.51252e-30	70.19	4	P:GO:0009785; P:GO:0080167; F:GO:0005515; C:GO:0005634	P:blue light signaling pathway; P:response to karrikin; F:protein binding; C:nucleus			IPR040374 (PANTHER); PTHR34207:SF2 (PANTHER)	P:GO:0009785	P:blue light signaling pathway
TRINITY_DN86580_c0_g2_i6	RecName: Full=Carboxypeptidase E; Short=CPE; AltName: Full=Carboxypeptidase H; Short=CPH; AltName: Full=Enkephalin convertase; AltName: Full=Prohormone-processing carboxypeptidase; Flags: Precursor	272	20	3.95884e-115	55.83	36	P:GO:0003214; P:GO:0010815; P:GO:0016055; P:GO:0030070; P:GO:0030072; P:GO:0030449; P:GO:0033366; P:GO:0034230; P:GO:0051384; P:GO:0071352; P:GO:0072657; P:GO:2000173; F:GO:0004181; F:GO:0008270; F:GO:0019904; F:GO:0042043; F:GO:0042302; F:GO:0044877; F:GO:0050839; F:GO:0050897; F:GO:0051721; C:GO:0005615; C:GO:0005634; C:GO:0005802; C:GO:0010008; C:GO:0016021; C:GO:0030425; C:GO:0030658; C:GO:00…	P:cardiac left ventricle morphogenesis; P:bradykinin catabolic process; P:Wnt signaling pathway; P:insulin processing; P:peptide hormone secretion; P:regulation of complement activation; P:protein localization to secretory granule; P:enkephalin processing; P:response to glucocorticoid; P:cellular response to interleukin-2; P:protein localization to membrane; P:negative regulation of branching mor…	EC:3.4.17.11; EC:3.4.17.22; EC:3.4.17.10; EC:3.4.17.21; EC:3.4.17; EC:3.4.17.2; EC:3.4.17.1; EC:3.4.17.17; EC:3.4.17.6; EC:3.4.17.4; EC:3.4.17.3	Glutamate carboxypeptidase; Metallocarboxypeptidase D; Carboxypeptidase E; Glutamate carboxypeptidase II; Acting on peptide bonds (peptidases); Carboxypeptidase B; Carboxypeptidase A; Tubulinyl-Tyr carboxypeptidase; Alanine carboxypeptidase; Gly-Xaa carboxypeptidase; Lysine carboxypeptidase	IPR000834 (SMART); G3DSA:2.60.40.1120 (GENE3D); IPR000834 (PFAM); G3DSA:3.40.630.10 (GENE3D); IPR015567 (PTHR11532:PANTHER); PTHR11532 (PANTHER); IPR000834 (PROSITE_PATTERNS); NON_CYTOPLASMIC_DOMAIN (PHOBIUS); CYTOPLASMIC_DOMAIN (PHOBIUS); TRANSMEMBRANE (PHOBIUS); cd11308 (CDD); cd18172 (CDD); IPR008969 (SUPERFAMILY); SSF53187 (SUPERFAMILY); TMhelix (TMHMM)	P:GO:0006508; P:GO:0006518; F:GO:0004181; F:GO:0008270	P:proteolysis; P:peptide metabolic process; F:metallocarboxypeptidase activity; F:zinc ion binding
TRINITY_DN79723_c2_g2_i1	RecName: Full=Choline-phosphate cytidylyltransferase 2; Short=AtCCT2; AltName: Full=CTP:phosphocholine cytidylyltransferase 2; AltName: Full=Phosphorylcholine transferase 2	117	2	6.64748e-21	86.11	3	P:GO:0006657; F:GO:0004105; F:GO:0031210	P:CDP-choline pathway; F:choline-phosphate cytidylyltransferase activity; F:phosphatidylcholine binding	EC:2.7.7.15	Choline-phosphate cytidylyltransferase	mobidb-lite (MOBIDB_LITE); mobidb-lite (MOBIDB_LITE); PTHR10739 (PANTHER); PTHR10739:SF52 (PANTHER); SignalP-noTM (SIGNALP_EUK)	no GO terms	no GO terms
TRINITY_DN88159_c0_g1_i9	RecName: Full=Glycosyltransferase 8 domain-containing protein 1	462	20	0	53.85	15	P:GO:0007155; P:GO:0009555; P:GO:0009860; P:GO:0010289; P:GO:0010417; P:GO:0048358; P:GO:0080001; F:GO:0047262; C:GO:0000137; C:GO:0000139; C:GO:0005739; C:GO:0005768; C:GO:0005802; C:GO:0016021; C:GO:0090406	P:cell adhesion; P:pollen development; P:pollen tube growth; P:homogalacturonan biosynthetic process; P:glucuronoxylan biosynthetic process; P:mucilage pectin biosynthetic process; P:mucilage extrusion from seed coat; F:polygalacturonate 4-alpha-galacturonosyltransferase activity; C:Golgi cis cisterna; C:Golgi membrane; C:mitochondrion; C:endosome; C:trans-Golgi network; C:integral component of m…	EC:2.4.1.43	Polygalacturonate 4-alpha-galacturonosyltransferase	IPR029044 (G3DSA:3.90.550.GENE3D); IPR002495 (PFAM); PTHR32116:SF30 (PANTHER); IPR029993 (PANTHER); CYTOPLASMIC_DOMAIN (PHOBIUS); CYTOPLASMIC_DOMAIN (PHOBIUS); TRANSMEMBRANE (PHOBIUS); NON_CYTOPLASMIC_DOMAIN (PHOBIUS); TRANSMEMBRANE (PHOBIUS); IPR029044 (SUPERFAMILY); TMhelix (TMHMM); TMhelix (TMHMM)	F:GO:0016757; F:GO:0047262	F:transferase activity, transferring glycosyl groups; F:polygalacturonate 4-alpha-galacturonosyltransferase activity
TRINITY_DN129125_c0_g1_i1	RecName: Full=Fasciclin-like arabinogalactan protein 11; Flags: Precursor	217	10	6.51513e-47	59.75	10	P:GO:0007155; P:GO:0009651; P:GO:0009738; P:GO:0009825; P:GO:0009834; P:GO:0048354; F:GO:0030247; C:GO:0009506; C:GO:0009897; C:GO:0046658	P:cell adhesion; P:response to salt stress; P:abscisic acid-activated signaling pathway; P:multidimensional cell growth; P:plant-type secondary cell wall biogenesis; P:mucilage biosynthetic process involved in seed coat development; F:polysaccharide binding; C:plasmodesma; C:external side of plasma membrane; C:anchored component of plasma membrane			IPR000782 (SMART); IPR000782 (PFAM); IPR036378 (G3DSA:2.30.180.GENE3D); PTHR32077 (PANTHER); PTHR32077:SF63 (PANTHER); NON_CYTOPLASMIC_DOMAIN (PHOBIUS); SIGNAL_PEPTIDE_N_REGION (PHOBIUS); SIGNAL_PEPTIDE (PHOBIUS); SIGNAL_PEPTIDE_H_REGION (PHOBIUS); SIGNAL_PEPTIDE_C_REGION (PHOBIUS); IPR000782 (PROSITE_PROFILES); SignalP-noTM (SIGNALP_EUK); SignalP-TM (SIGNALP_GRAM_POSITIVE); SignalP-noTM (SIGNALP…	no GO terms	no GO terms
TRINITY_DN82327_c0_g2_i2	RecName: Full=CBS domain-containing protein CBSX1, chloroplastic; AltName: Full=CBS domain-containing protein 2; Short=AtCDCP2; AltName: Full=Protein LOSS OF THE TIMING OF ET AND JA BIOSYNTHESIS 2; Short=AtLEJ2; Flags: Precursor	104	2	3.23168e-08	68.22	2	P:GO:0045454; C:GO:0009507	P:cell redox homeostasis; C:chloroplast			cd04601 (CDD)	no GO terms	no GO terms
TRINITY_DN85312_c0_g1_i7	RecName: Full=Uncharacterized protein At1g01500	311	1	4.30142e-48	61.62	4	P:GO:0006520; P:GO:0055114; F:GO:0004617; C:GO:0016021	P:cellular amino acid metabolic process; P:oxidation-reduction process; F:phosphoglycerate dehydrogenase activity; C:integral component of membrane	EC:1.1.1.95	Phosphoglycerate dehydrogenase	PTHR42938:SF17 (PANTHER); PTHR42938 (PANTHER); TRANSMEMBRANE (PHOBIUS); NON_CYTOPLASMIC_DOMAIN (PHOBIUS); CYTOPLASMIC_DOMAIN (PHOBIUS); cd18121 (CDD); TMhelix (TMHMM)	no GO terms	no GO terms
TRINITY_DN79878_c0_g1_i1	RecName: Full=Probable cyclic nucleotide-gated ion channel 10; AltName: Full=CaM-regulated potassium ion channel; AltName: Full=Cyclic nucleotide- and calmodulin-regulated ion channel 10	612	20	0	62.16	24	P:GO:0006874; P:GO:0006952; P:GO:0009617; P:GO:0009620; P:GO:0009860; P:GO:0009877; P:GO:0019722; P:GO:0036377; P:GO:0046686; P:GO:0070588; P:GO:0071805; P:GO:0080027; F:GO:0005223; F:GO:0005249; F:GO:0005516; F:GO:0030552; F:GO:0030553; F:GO:0044325; F:GO:0099604; C:GO:0016021; C:GO:0016324; C:GO:0030659; C:GO:0031965; C:GO:0090406	P:cellular calcium ion homeostasis; P:defense response; P:response to bacterium; P:response to fungus; P:pollen tube growth; P:nodulation; P:calcium-mediated signaling; P:arbuscular mycorrhizal association; P:response to cadmium ion; P:calcium ion transmembrane transport; P:potassium ion transmembrane transport; P:response to herbivore; F:intracellular cGMP-activated cation channel activity; F:vo…			IPR000595 (SMART); IPR005821 (PFAM); G3DSA:1.10.287.630 (GENE3D); IPR014710 (G3DSA:2.60.120.GENE3D); IPR000595 (PFAM); mobidb-lite (MOBIDB_LITE); PTHR45651 (PANTHER); PTHR45651:SF35 (PANTHER); PTHR45651:SF35 (PANTHER); PTHR45651 (PANTHER); NON_CYTOPLASMIC_DOMAIN (PHOBIUS); TRANSMEMBRANE (PHOBIUS); CYTOPLASMIC_DOMAIN (PHOBIUS); TRANSMEMBRANE (PHOBIUS); NON_CYTOPLASMIC_DOMAIN (PHOBIUS); TRANSMEMBRA…	P:GO:0006811; P:GO:0055085; F:GO:0005216; F:GO:0005515; C:GO:0016020	P:ion transport; P:transmembrane transport; F:ion channel activity; F:protein binding; C:membrane
TRINITY_DN878_c0_g1_i1	RecName: Full=Copper transporter 1; Short=AtCOPT1	156	14	1.91968e-38	66.01	11	P:GO:0006878; P:GO:0006952; P:GO:0034219; P:GO:0048235; P:GO:0048364; P:GO:0098705; F:GO:0015089; F:GO:0043621; F:GO:0051119; C:GO:0005773; C:GO:0005887	P:cellular copper ion homeostasis; P:defense response; P:carbohydrate transmembrane transport; P:pollen sperm cell differentiation; P:root development; P:copper ion import across plasma membrane; F:high-affinity copper ion transmembrane transporter activity; F:protein self-association; F:sugar transmembrane transporter activity; C:vacuole; C:integral component of plasma membrane			IPR007274 (PFAM); PTHR12483:SF80 (PANTHER); IPR007274 (PANTHER); SIGNAL_PEPTIDE_N_REGION (PHOBIUS); SIGNAL_PEPTIDE (PHOBIUS); SIGNAL_PEPTIDE_C_REGION (PHOBIUS); CYTOPLASMIC_DOMAIN (PHOBIUS); SIGNAL_PEPTIDE_H_REGION (PHOBIUS); TRANSMEMBRANE (PHOBIUS); NON_CYTOPLASMIC_DOMAIN (PHOBIUS); TMhelix (TMHMM); TMhelix (TMHMM)	P:GO:0035434; F:GO:0005375; C:GO:0016021	P:copper ion transmembrane transport; F:copper ion transmembrane transporter activity; C:integral component of membrane
TRINITY_DN90155_c2_g1_i3	RecName: Full=Oligopeptide transporter 5; Short=AtOPT5	218	14	8.1293e-101	65.76	23	P:GO:0006875; P:GO:0015031; P:GO:0042144; P:GO:0044088; P:GO:0045454; P:GO:0048235; P:GO:0051515; P:GO:0055072; P:GO:0061091; P:GO:0080167; P:GO:0098709; P:GO:1901583; P:GO:1990388; F:GO:0005427; F:GO:0034634; F:GO:0046915; F:GO:1901584; C:GO:0000138; C:GO:0005777; C:GO:0005789; C:GO:0005887; C:GO:0009506; C:GO:0031520	P:cellular metal ion homeostasis; P:protein transport; P:vacuole fusion, non-autophagic; P:regulation of vacuole organization; P:cell redox homeostasis; P:pollen sperm cell differentiation; P:positive regulation of monopolar cell growth; P:iron ion homeostasis; P:regulation of phospholipid translocation; P:response to karrikin; P:glutathione import across plasma membrane; P:tetrapeptide transmemb…			IPR004813 (PFAM); IPR004813 (TIGRFAM); PTHR22601:SF74 (PANTHER); PTHR22601 (PANTHER); TRANSMEMBRANE (PHOBIUS); TRANSMEMBRANE (PHOBIUS); NON_CYTOPLASMIC_DOMAIN (PHOBIUS); TRANSMEMBRANE (PHOBIUS); TRANSMEMBRANE (PHOBIUS); TRANSMEMBRANE (PHOBIUS); NON_CYTOPLASMIC_DOMAIN (PHOBIUS); CYTOPLASMIC_DOMAIN (PHOBIUS); CYTOPLASMIC_DOMAIN (PHOBIUS); CYTOPLASMIC_DOMAIN (PHOBIUS); NON_CYTOPLASMIC_DOMAIN (PHOBIU…	P:GO:0055085	P:transmembrane transport
TRINITY_DN91219_c2_g2_i8	RecName: Full=Squamosa promoter-binding-like protein 15	397	9	9.05978e-168	59.84	12	P:GO:0035874; P:GO:0042742; P:GO:0045893; P:GO:0048638; F:GO:0000976; F:GO:0003700; F:GO:0042803; F:GO:0046872; C:GO:0005737; C:GO:0005886; C:GO:0016607; C:GO:0042025	P:cellular response to copper ion starvation; P:defense response to bacterium; P:positive regulation of transcription, DNA-templated; P:regulation of developmental growth; F:transcription regulatory region sequence-specific DNA binding; F:DNA-binding transcription factor activity; F:protein homodimerization activity; F:metal ion binding; C:cytoplasm; C:plasma membrane; C:nuclear speck; C:host cel…			PTHR31251 (PANTHER); PTHR31251:SF110 (PANTHER)	no GO terms	no GO terms
TRINITY_DN69253_c1_g1_i1	RecName: Full=Methionine synthase; AltName: Full=5-methyltetrahydrofolate--homocysteine methyltransferase; AltName: Full=Methionine synthase, vitamin-B12 dependent; Short=MS	354	20	0	62.37	16	P:GO:0006974; P:GO:0009086; P:GO:0010269; P:GO:0032259; P:GO:0033528; P:GO:0042558; P:GO:0046498; P:GO:0050667; F:GO:0008270; F:GO:0008705; F:GO:0008898; F:GO:0016205; F:GO:0016491; F:GO:0047150; C:GO:0005829; C:GO:0005886	P:cellular response to DNA damage stimulus; P:methionine biosynthetic process; P:response to selenium ion; P:methylation; P:S-methylmethionine cycle; P:pteridine-containing compound metabolic process; P:S-adenosylhomocysteine metabolic process; P:homocysteine metabolic process; F:zinc ion binding; F:methionine synthase activity; F:S-adenosylmethionine-homocysteine S-methyltransferase activity; F:…	EC:2.1.1.13; EC:2.1.1.280; EC:2.1.1.5	Methionine synthase; Selenocysteine Se-methyltransferase; Betaine--homocysteine S-methyltransferase	IPR036589 (G3DSA:3.20.20.GENE3D); IPR003726 (PFAM); IPR017226 (PIRSF); PTHR46015 (PANTHER); PTHR46015:SF7 (PANTHER); IPR003726 (PROSITE_PROFILES); IPR036589 (SUPERFAMILY)	P:GO:0009086; F:GO:0008270; F:GO:0047150	P:methionine biosynthetic process; F:zinc ion binding; F:betaine-homocysteine S-methyltransferase activity
TRINITY_DN84270_c0_g3_i1	RecName: Full=Transcription activator GLK1; AltName: Full=GBF'S PRO-RICH REGION-INTERACTING factor 1; AltName: Full=Golden2-like protein 1; Short=AtGLK1	257	20	1.06018e-43	74.2	17	P:GO:0009658; P:GO:0009736; P:GO:0009873; P:GO:0009910; P:GO:0010082; P:GO:0010119; P:GO:0010380; P:GO:0010638; P:GO:0042753; P:GO:0045893; P:GO:0080113; P:GO:1900056; F:GO:0000156; F:GO:0000976; F:GO:0003700; F:GO:0042802; C:GO:0005634	P:chloroplast organization; P:cytokinin-activated signaling pathway; P:ethylene-activated signaling pathway; P:negative regulation of flower development; P:regulation of root meristem growth; P:regulation of stomatal movement; P:regulation of chlorophyll biosynthetic process; P:positive regulation of organelle organization; P:positive regulation of circadian rhythm; P:positive regulation of trans…			IPR006447 (TIGRFAM); IPR001005 (PFAM); G3DSA:1.10.10.60 (GENE3D); mobidb-lite (MOBIDB_LITE); mobidb-lite (MOBIDB_LITE); mobidb-lite (MOBIDB_LITE); PTHR31312 (PANTHER); PTHR31312:SF1 (PANTHER); IPR017930 (PROSITE_PROFILES); IPR009057 (SUPERFAMILY)	F:GO:0003677	F:DNA binding
TRINITY_DN90911_c4_g1_i1	RecName: Full=B-box domain protein 30; Short=AtBBX30; AltName: Full=Microprotein 1A	149	20	6.17433e-11	60.58	18	P:GO:0007623; P:GO:0009658; P:GO:0009785; P:GO:0009909; P:GO:0010099; P:GO:0010161; P:GO:0010200; P:GO:0010224; P:GO:0045892; P:GO:0048579; F:GO:0000976; F:GO:0003700; F:GO:0005515; F:GO:0008270; F:GO:0030674; C:GO:0005634; C:GO:0005737; C:GO:0005886	P:circadian rhythm; P:chloroplast organization; P:blue light signaling pathway; P:regulation of flower development; P:regulation of photomorphogenesis; P:red light signaling pathway; P:response to chitin; P:response to UV-B; P:negative regulation of transcription, DNA-templated; P:negative regulation of long-day photoperiodism, flowering; F:transcription regulatory region sequence-specific DNA bi…			Coil (COILS); IPR000315 (SMART); IPR000315 (PFAM); mobidb-lite (MOBIDB_LITE); mobidb-lite (MOBIDB_LITE); mobidb-lite (MOBIDB_LITE); PTHR31717:SF60 (PANTHER); PTHR31717 (PANTHER); IPR000315 (PROSITE_PROFILES); IPR000315 (CDD)	F:GO:0008270	F:zinc ion binding
TRINITY_DN79031_c0_g1_i2	RecName: Full=Superoxide dismutase [Fe]	270	20	1.40715e-112	65.74	17	P:GO:0007623; P:GO:0009411; P:GO:0009642; P:GO:0010193; P:GO:0019430; P:GO:0046686; P:GO:0046688; P:GO:0055114; F:GO:0004784; F:GO:0019904; F:GO:0046872; C:GO:0005739; C:GO:0005829; C:GO:0005886; C:GO:0009534; C:GO:0009941; C:GO:0042644	P:circadian rhythm; P:response to UV; P:response to light intensity; P:response to ozone; P:removal of superoxide radicals; P:response to cadmium ion; P:response to copper ion; P:oxidation-reduction process; F:superoxide dismutase activity; F:protein domain specific binding; F:metal ion binding; C:mitochondrion; C:cytosol; C:plasma membrane; C:chloroplast thylakoid; C:chloroplast envelope; C:chlo…	EC:1.15.1.1	Superoxide dismutase	IPR001189 (PRINTS); IPR019832 (PFAM); IPR001189 (PIRSF); IPR036314 (G3DSA:2.40.500.GENE3D); IPR036324 (G3DSA:1.10.287.GENE3D); IPR019831 (PFAM); PTHR42769:SF8 (PANTHER); PTHR42769 (PANTHER); IPR019833 (PROSITE_PATTERNS); SIGNAL_PEPTIDE_C_REGION (PHOBIUS); SIGNAL_PEPTIDE (PHOBIUS); SIGNAL_PEPTIDE_H_REGION (PHOBIUS); NON_CYTOPLASMIC_DOMAIN (PHOBIUS); SIGNAL_PEPTIDE_N_REGION (PHOBIUS); IPR036324 (SU…	P:GO:0006801; P:GO:0055114; F:GO:0004784; F:GO:0046872	P:superoxide metabolic process; P:oxidation-reduction process; F:superoxide dismutase activity; F:metal ion binding
TRINITY_DN75745_c0_g1_i1	RecName: Full=B-box domain protein 31; Short=AtBBX31; AltName: Full=Microprotein 1B	138	20	2.82802e-27	62.81	21	P:GO:0007623; P:GO:0009641; P:GO:0009658; P:GO:0009785; P:GO:0009909; P:GO:0010018; P:GO:0010099; P:GO:0010161; P:GO:0010200; P:GO:0010223; P:GO:0010224; P:GO:0030154; P:GO:0045892; P:GO:0045893; F:GO:0000976; F:GO:0003700; F:GO:0008270; F:GO:0030674; F:GO:0042802; C:GO:0005730; C:GO:0005737	P:circadian rhythm; P:shade avoidance; P:chloroplast organization; P:blue light signaling pathway; P:regulation of flower development; P:far-red light signaling pathway; P:regulation of photomorphogenesis; P:red light signaling pathway; P:response to chitin; P:secondary shoot formation; P:response to UV-B; P:cell differentiation; P:negative regulation of transcription, DNA-templated; P:positive r…			IPR000315 (SMART); mobidb-lite (MOBIDB_LITE); mobidb-lite (MOBIDB_LITE); PTHR31717:SF100 (PANTHER); PTHR31717 (PANTHER); IPR000315 (PROSITE_PROFILES); IPR000315 (CDD)	F:GO:0008270	F:zinc ion binding
TRINITY_DN77269_c3_g1_i1	RecName: Full=B-box domain protein 31; Short=AtBBX31; AltName: Full=Microprotein 1B	130	20	5.65735e-26	63.68	21	P:GO:0007623; P:GO:0009641; P:GO:0009658; P:GO:0009785; P:GO:0009909; P:GO:0010018; P:GO:0010099; P:GO:0010161; P:GO:0010200; P:GO:0010223; P:GO:0010224; P:GO:0030154; P:GO:0045892; P:GO:0045893; F:GO:0000976; F:GO:0003700; F:GO:0008270; F:GO:0030674; F:GO:0042802; C:GO:0005730; C:GO:0005737	P:circadian rhythm; P:shade avoidance; P:chloroplast organization; P:blue light signaling pathway; P:regulation of flower development; P:far-red light signaling pathway; P:regulation of photomorphogenesis; P:red light signaling pathway; P:response to chitin; P:secondary shoot formation; P:response to UV-B; P:cell differentiation; P:negative regulation of transcription, DNA-templated; P:positive r…			IPR000315 (SMART); PTHR31717 (PANTHER); PTHR31717:SF100 (PANTHER); IPR000315 (PROSITE_PROFILES); IPR000315 (CDD)	F:GO:0008270	F:zinc ion binding
TRINITY_DN112624_c0_g1_i1	RecName: Full=5'-adenylylsulfate reductase 1, chloroplastic; AltName: Full=3'-phosphoadenosine-5'-phosphosulfate reductase homolog 19; Short=PAPS reductase homolog 19; Short=Prh-19; AltName: Full=Adenosine 5'-phosphosulfate 5'-adenylylsulfate sulfotransferase 1; Short=APS sulfotransferase 1; AltName: Full=Thioredoxin-independent APS reductase 1; Flags: Precursor	75	5	1.64435e-36	81.04	10	P:GO:0019344; P:GO:0019379; F:GO:0004604; F:GO:0005515; F:GO:0009973; F:GO:0033741; F:GO:0046872; F:GO:0051539; C:GO:0009534; C:GO:0009570	P:cysteine biosynthetic process; P:sulfate assimilation, phosphoadenylyl sulfate reduction by phosphoadenylyl-sulfate reductase (thioredoxin); F:phosphoadenylyl-sulfate reductase (thioredoxin) activity; F:protein binding; F:adenylyl-sulfate reductase activity; F:adenylyl-sulfate reductase (glutathione) activity; F:metal ion binding; F:4 iron, 4 sulfur cluster binding; C:chloroplast thylakoid; C:c…	EC:1.8.4.9; EC:1.8.99.2; EC:1.8.4.8	Adenylyl-sulfate reductase (glutathione); Adenylyl-sulfate reductase; Phosphoadenylyl-sulfate reductase (thioredoxin)	IPR036249 (G3DSA:3.40.30.GENE3D); PTHR46482 (PANTHER); PTHR46482:SF8 (PANTHER); IPR036249 (SUPERFAMILY)	no GO terms	no GO terms
TRINITY_DN126200_c0_g2_i1	RecName: Full=Phosphoadenosine phosphosulfate reductase; AltName: Full=3'-phosphoadenylylsulfate reductase; AltName: Full=PAPS reductase, thioredoxin dependent; AltName: Full=PAPS sulfotransferase; AltName: Full=PAdoPS reductase	100	13	5.88147e-63	67.91	12	P:GO:0019344; P:GO:0019379; P:GO:0070814; F:GO:0004604; F:GO:0005515; F:GO:0009973; F:GO:0033741; F:GO:0043866; F:GO:0046872; F:GO:0051539; C:GO:0009534; C:GO:0009570	P:cysteine biosynthetic process; P:sulfate assimilation, phosphoadenylyl sulfate reduction by phosphoadenylyl-sulfate reductase (thioredoxin); P:hydrogen sulfide biosynthetic process; F:phosphoadenylyl-sulfate reductase (thioredoxin) activity; F:protein binding; F:adenylyl-sulfate reductase activity; F:adenylyl-sulfate reductase (glutathione) activity; F:adenylyl-sulfate reductase (thioredoxin) a…	EC:1.8.4.9; EC:1.8.99.2; EC:1.8.4.8; EC:1.8.4.10	Adenylyl-sulfate reductase (glutathione); Adenylyl-sulfate reductase; Phosphoadenylyl-sulfate reductase (thioredoxin); Adenylyl-sulfate reductase (thioredoxin)	IPR002500 (PFAM); IPR014729 (G3DSA:3.40.50.GENE3D); PTHR46482:SF10 (PANTHER); PTHR46482 (PANTHER); IPR002500 (CDD); SSF52402 (SUPERFAMILY)	F:GO:0003824	F:catalytic activity
TRINITY_DN85094_c0_g3_i1	RecName: Full=Phosphoadenosine phosphosulfate reductase; AltName: Full=3'-phosphoadenylylsulfate reductase; AltName: Full=PAPS reductase, thioredoxin dependent; AltName: Full=PAPS sulfotransferase; AltName: Full=PAdoPS reductase	467	20	0	61.99	12	P:GO:0019344; P:GO:0019379; P:GO:0070814; F:GO:0004604; F:GO:0005515; F:GO:0009973; F:GO:0033741; F:GO:0043866; F:GO:0046872; F:GO:0051539; C:GO:0009534; C:GO:0009570	P:cysteine biosynthetic process; P:sulfate assimilation, phosphoadenylyl sulfate reduction by phosphoadenylyl-sulfate reductase (thioredoxin); P:hydrogen sulfide biosynthetic process; F:phosphoadenylyl-sulfate reductase (thioredoxin) activity; F:protein binding; F:adenylyl-sulfate reductase activity; F:adenylyl-sulfate reductase (glutathione) activity; F:adenylyl-sulfate reductase (thioredoxin) a…	EC:1.8.4.9; EC:1.8.99.2; EC:1.8.4.8; EC:1.8.4.10	Adenylyl-sulfate reductase (glutathione); Adenylyl-sulfate reductase; Phosphoadenylyl-sulfate reductase (thioredoxin); Adenylyl-sulfate reductase (thioredoxin)	IPR004508 (TIGRFAM); IPR014729 (G3DSA:3.40.50.GENE3D); IPR002500 (PFAM); IPR036249 (G3DSA:3.40.30.GENE3D); IPR013766 (PFAM); PTHR46482:SF8 (PANTHER); PTHR46482 (PANTHER); IPR013766 (PROSITE_PROFILES); cd02993 (CDD); IPR002500 (CDD); SSF52402 (SUPERFAMILY); IPR036249 (SUPERFAMILY)	P:GO:0019419; P:GO:0055114; F:GO:0003824; F:GO:0016671	P:sulfate reduction; P:oxidation-reduction process; F:catalytic activity; F:oxidoreductase activity, acting on a sulfur group of donors, disulfide as acceptor
TRINITY_DN89162_c0_g3_i2	RecName: Full=Zinc finger CCCH domain-containing protein 15 homolog	201	17	8.55749e-76	66.59	9	P:GO:0002181; P:GO:0016973; P:GO:0019221; P:GO:0043547; F:GO:0003677; F:GO:0005515; F:GO:0046872; C:GO:0005730; C:GO:0005829	P:cytoplasmic translation; P:poly(A)+ mRNA export from nucleus; P:cytokine-mediated signaling pathway; P:positive regulation of GTPase activity; F:DNA binding; F:protein binding; F:metal ion binding; C:nucleolus; C:cytosol			IPR032378 (PFAM); mobidb-lite (MOBIDB_LITE); mobidb-lite (MOBIDB_LITE); mobidb-lite (MOBIDB_LITE); PTHR12681 (PANTHER); PTHR12681:SF13 (PANTHER); IPR000571 (PROSITE_PROFILES)	F:GO:0046872	F:metal ion binding
TRINITY_DN92039_c2_g5_i3	RecName: Full=L-threonine dehydratase biosynthetic IlvA; AltName: Full=Threonine deaminase	470	20	0	69.06	16	P:GO:0002213; P:GO:0006565; P:GO:0006567; P:GO:0009097; P:GO:0009405; P:GO:0009625; P:GO:0031349; P:GO:0051289; P:GO:0080027; F:GO:0003941; F:GO:0004794; F:GO:0016597; F:GO:0030170; F:GO:0042802; C:GO:0005739; C:GO:0009507	P:defense response to insect; P:L-serine catabolic process; P:threonine catabolic process; P:isoleucine biosynthetic process; P:pathogenesis; P:response to insect; P:positive regulation of defense response; P:protein homotetramerization; P:response to herbivore; F:L-serine ammonia-lyase activity; F:L-threonine ammonia-lyase activity; F:amino acid binding; F:pyridoxal phosphate binding; F:identica…	EC:4.3.1.17; EC:4.3.1.19	L-serine ammonia-lyase; Threonine ammonia-lyase	IPR036052 (G3DSA:3.40.50.GENE3D); IPR005787 (TIGRFAM); IPR036052 (G3DSA:3.40.50.GENE3D); IPR001926 (PFAM); IPR001721 (PFAM); mobidb-lite (MOBIDB_LITE); mobidb-lite (MOBIDB_LITE); PTHR48078 (PANTHER); PTHR48078:SF1 (PANTHER); IPR000634 (PROSITE_PATTERNS); cd01562 (CDD); IPR036052 (SUPERFAMILY)	P:GO:0006520; P:GO:0009097; F:GO:0004794; F:GO:0030170	P:cellular amino acid metabolic process; P:isoleucine biosynthetic process; F:L-threonine ammonia-lyase activity; F:pyridoxal phosphate binding
TRINITY_DN92039_c2_g5_i2	RecName: Full=L-threonine dehydratase biosynthetic IlvA; AltName: Full=Threonine deaminase	96	14	1.68851e-36	67.48	18	P:GO:0002213; P:GO:0006565; P:GO:0006567; P:GO:0009097; P:GO:0009611; P:GO:0009625; P:GO:0009737; P:GO:0009753; P:GO:0031349; P:GO:0051289; P:GO:0080027; F:GO:0003941; F:GO:0004794; F:GO:0016597; F:GO:0030170; F:GO:0042802; C:GO:0005739; C:GO:0009507	P:defense response to insect; P:L-serine catabolic process; P:threonine catabolic process; P:isoleucine biosynthetic process; P:response to wounding; P:response to insect; P:response to abscisic acid; P:response to jasmonic acid; P:positive regulation of defense response; P:protein homotetramerization; P:response to herbivore; F:L-serine ammonia-lyase activity; F:L-threonine ammonia-lyase activit…	EC:4.3.1.17; EC:4.3.1.19	L-serine ammonia-lyase; Threonine ammonia-lyase	IPR001721 (PFAM); IPR038110 (G3DSA:3.40.1020.GENE3D); PTHR48078:SF1 (PANTHER); PTHR48078 (PANTHER); IPR001721 (PROSITE_PROFILES); cd04907 (CDD); SSF55021 (SUPERFAMILY)	no GO terms	no GO terms
TRINITY_DN58871_c0_g1_i1	RecName: Full=Protopine 6-monooxygenase; AltName: Full=Protopine 6-hydroxylase; Short=P6H	493	20	1.69485e-168	61.61	25	P:GO:0002213; P:GO:0009617; P:GO:0009718; P:GO:0009733; P:GO:0016114; P:GO:0033075; P:GO:0046246; P:GO:0050832; P:GO:0055114; P:GO:0071281; P:GO:0071456; P:GO:0106146; P:GO:1901045; F:GO:0005506; F:GO:0016711; F:GO:0020037; F:GO:0033772; F:GO:0047084; F:GO:0047087; F:GO:0097007; F:GO:0097008; F:GO:0106144; F:GO:0106149; C:GO:0005789; C:GO:0016021	P:defense response to insect; P:response to bacterium; P:anthocyanin-containing compound biosynthetic process; P:response to auxin; P:terpenoid biosynthetic process; P:isoquinoline alkaloid biosynthetic process; P:terpene biosynthetic process; P:defense response to fungus; P:oxidation-reduction process; P:cellular response to iron ion; P:cellular response to hypoxia; P:sideretin biosynthesis; P:n…	EC:1.14.14.82; EC:1.14.14.81; EC:1.14.14.97; EC:1.14.13; EC:1.14.14.98	Flavonoid 3'-monooxygenase; Flavonoid 3',5'-hydroxylase; Methyltetrahydroprotoberberine 14-monooxygenase; Acting on paired donors, with incorporation or reduction of molecular oxygen. The oxygen incorporated need not be derived from O(2); Protopine 6-monooxygenase	IPR001128 (PRINTS); IPR002401 (PRINTS); IPR036396 (G3DSA:1.10.630.GENE3D); IPR001128 (PFAM); PTHR47947 (PANTHER); PTHR47947:SF25 (PANTHER); IPR017972 (PROSITE_PATTERNS); IPR036396 (SUPERFAMILY)	P:GO:0055114; F:GO:0005506; F:GO:0016705; F:GO:0020037	P:oxidation-reduction process; F:iron ion binding; F:oxidoreductase activity, acting on paired donors, with incorporation or reduction of molecular oxygen; F:heme binding
TRINITY_DN57583_c0_g1_i1	RecName: Full=Noroxomaritidine synthase 2; AltName: Full=CYP96T2; AltName: Full=Cytochrome P450 96T2	237	20	2.27823e-96	64.01	25	P:GO:0002213; P:GO:0009611; P:GO:0009694; P:GO:0009820; P:GO:0010025; P:GO:0010154; P:GO:0010345; P:GO:0035336; P:GO:0042761; P:GO:0048480; P:GO:0048653; P:GO:0055114; P:GO:0071555; P:GO:0080110; F:GO:0005506; F:GO:0005515; F:GO:0016709; F:GO:0018685; F:GO:0020037; F:GO:0052694; F:GO:0070330; F:GO:0080133; C:GO:0005773; C:GO:0005789; C:GO:0016021	P:defense response to insect; P:response to wounding; P:jasmonic acid metabolic process; P:alkaloid metabolic process; P:wax biosynthetic process; P:fruit development; P:suberin biosynthetic process; P:long-chain fatty-acyl-CoA metabolic process; P:very long-chain fatty acid biosynthetic process; P:stigma development; P:anther development; P:oxidation-reduction process; P:cell wall organization; …	EC:1.14.15.3; EC:1.14.14.1; EC:1.14.15; EC:1.14.14; EC:1.14.13	Alkane 1-monooxygenase; Unspecific monooxygenase; Acting on paired donors, with incorporation or reduction of molecular oxygen. The oxygen incorporated need not be derived from O(2); Acting on paired donors, with incorporation or reduction of molecular oxygen. The oxygen incorporated need not be derived from O(2); Acting on paired donors, with incorporation or reduction of molecular oxygen. The o…	IPR001128 (PRINTS); IPR002401 (PRINTS); IPR036396 (G3DSA:1.10.630.GENE3D); IPR001128 (PFAM); PTHR24296 (PANTHER); PTHR24296:SF30 (PANTHER); IPR036396 (SUPERFAMILY)	P:GO:0055114; F:GO:0005506; F:GO:0016705; F:GO:0020037	P:oxidation-reduction process; F:iron ion binding; F:oxidoreductase activity, acting on paired donors, with incorporation or reduction of molecular oxygen; F:heme binding
TRINITY_DN78434_c0_g1_i5	RecName: Full=Disease resistance protein RRS1; AltName: Full=Disease resistance protein RCH2; AltName: Full=Probable WRKY transcription factor 52; AltName: Full=Resistance to Colletotrichum higginsianum 2 protein; AltName: Full=Resistance to Ralstonia solanacearum 1 protein	331	20	1.23797e-36	54.43	32	P:GO:0002215; P:GO:0002229; P:GO:0009624; P:GO:0009625; P:GO:0009738; P:GO:0009816; P:GO:0009862; P:GO:0009864; P:GO:0010104; P:GO:0010193; P:GO:0010200; P:GO:0042542; P:GO:0045892; P:GO:0045893; P:GO:0047484; P:GO:0048527; P:GO:0050832; P:GO:0080151; P:GO:0080187; P:GO:0090333; P:GO:1900056; P:GO:1900457; P:GO:2000022; P:GO:2000068; P:GO:2000070; F:GO:0000987; F:GO:0003700; F:GO:0005524; F:GO:00…	P:defense response to nematode; P:defense response to oomycetes; P:response to nematode; P:response to insect; P:abscisic acid-activated signaling pathway; P:defense response to bacterium, incompatible interaction; P:systemic acquired resistance, salicylic acid mediated signaling pathway; P:induced systemic resistance, jasmonic acid mediated signaling pathway; P:regulation of ethylene-activated s…			IPR003657 (SMART); IPR003657 (PFAM); IPR036576 (G3DSA:2.20.25.GENE3D); mobidb-lite (MOBIDB_LITE); PTHR31282:SF85 (PANTHER); PTHR31282 (PANTHER); IPR003657 (PROSITE_PROFILES); IPR036576 (SUPERFAMILY)	P:GO:0006355; F:GO:0003700; F:GO:0043565	P:regulation of transcription, DNA-templated; F:DNA-binding transcription factor activity; F:sequence-specific DNA binding
TRINITY_DN88241_c0_g1_i4	RecName: Full=Receptor kinase-like protein Xa21; Contains: RecName: Full=Receptor kinase-like protein Xa21, processed; Flags: Precursor	335	20	3.6045e-123	56.87	47	P:GO:0002215; P:GO:0006833; P:GO:0006898; P:GO:0007178; P:GO:0009611; P:GO:0009742; P:GO:0009793; P:GO:0009825; P:GO:0009845; P:GO:0009934; P:GO:0010082; P:GO:0010089; P:GO:0010359; P:GO:0016032; P:GO:0016045; P:GO:0030104; P:GO:0042659; P:GO:0045184; P:GO:0046777; P:GO:0048229; P:GO:0048437; P:GO:0051302; P:GO:0052544; P:GO:0055075; P:GO:0090558; P:GO:0090708; P:GO:1900426; P:GO:1903224; P:GO:20…	P:defense response to nematode; P:water transport; P:receptor-mediated endocytosis; P:transmembrane receptor protein serine/threonine kinase signaling pathway; P:response to wounding; P:brassinosteroid mediated signaling pathway; P:embryo development ending in seed dormancy; P:multidimensional cell growth; P:seed germination; P:regulation of meristem structural organization; P:regulation of root …	EC:2.7.11; EC:2.7.11.30	Transferring phosphorus-containing groups; Receptor protein serine/threonine kinase	IPR000719 (SMART); PIRSF000654 (PIRSF); G3DSA:3.30.200.20 (GENE3D); G3DSA:1.10.510.10 (GENE3D); IPR000719 (PFAM); PTHR48056 (PANTHER); PTHR48056:SF7 (PANTHER); IPR008271 (PROSITE_PATTERNS); IPR000719 (PROSITE_PROFILES); cd14066 (CDD); IPR011009 (SUPERFAMILY)	P:GO:0006468; F:GO:0004672; F:GO:0005524	P:protein phosphorylation; F:protein kinase activity; F:ATP binding
TRINITY_DN77155_c0_g1_i1	RecName: Full=Probable 2-oxoglutarate-dependent dioxygenase At5g05600	366	20	3.48105e-58	51.76	35	P:GO:0002229; P:GO:0009413; P:GO:0009620; P:GO:0009639; P:GO:0009686; P:GO:0009740; P:GO:0009751; P:GO:0009826; P:GO:0009908; P:GO:0010150; P:GO:0032259; P:GO:0040008; P:GO:0042742; P:GO:0046244; P:GO:0048575; P:GO:0051555; P:GO:0055114; P:GO:0080167; P:GO:0097237; P:GO:0097295; P:GO:2000022; F:GO:0008168; F:GO:0031418; F:GO:0033759; F:GO:0034785; F:GO:0045431; F:GO:0045486; F:GO:0045544; F:GO:00…	P:defense response to oomycetes; P:response to flooding; P:response to fungus; P:response to red or far red light; P:gibberellin biosynthetic process; P:gibberellic acid mediated signaling pathway; P:response to salicylic acid; P:unidimensional cell growth; P:flower development; P:leaf senescence; P:methylation; P:regulation of growth; P:defense response to bacterium; P:salicylic acid catabolic p…	EC:1.14.11; EC:1.14.20.6; EC:1.14.11.9; EC:1.14.13; EC:1.14.11.31; EC:1.14.20.5; EC:1.14.11.32	Acting on paired donors, with incorporation or reduction of molecular oxygen. The oxygen incorporated need not be derived from O(2); Flavonol synthase; Flavanone 3-dioxygenase; Acting on paired donors, with incorporation or reduction of molecular oxygen. The oxygen incorporated need not be derived from O(2); Thebaine 6-O-demethylase; Flavone synthase I; Codeine 3-O-demethylase	PR00682 (PRINTS); IPR005123 (PFAM); IPR026992 (PFAM); IPR027443 (G3DSA:2.60.120.GENE3D); PTHR10209:SF664 (PANTHER); PTHR10209 (PANTHER); IPR005123 (PROSITE_PROFILES); SSF51197 (SUPERFAMILY)	P:GO:0055114; F:GO:0016491	P:oxidation-reduction process; F:oxidoreductase activity
TRINITY_DN88546_c2_g1_i1	RecName: Full=ABC transporter G family member 36; Short=OsABCG36; AltName: Full=Pleiotropic drug resistance protein 9; Short=OsPDR9	1044	20	0	75.63	27	P:GO:0002229; P:GO:0009408; P:GO:0009409; P:GO:0009723; P:GO:0009738; P:GO:0009751; P:GO:0009753; P:GO:0009914; P:GO:0010193; P:GO:0010496; P:GO:0015692; P:GO:0042335; P:GO:0042631; P:GO:0042908; P:GO:0048581; P:GO:0080168; P:GO:0090332; P:GO:0098657; P:GO:0098739; P:GO:2000032; F:GO:0005515; F:GO:0005524; F:GO:0015562; F:GO:0016887; F:GO:0042626; C:GO:0005886; C:GO:0016021	P:defense response to oomycetes; P:response to heat; P:response to cold; P:response to ethylene; P:abscisic acid-activated signaling pathway; P:response to salicylic acid; P:response to jasmonic acid; P:hormone transport; P:response to ozone; P:intercellular transport; P:lead ion transport; P:cuticle development; P:cellular response to water deprivation; P:xenobiotic transport; P:negative regulat…	EC:3.6.1.3; EC:3.6.1.15	Adenosinetriphosphatase; Nucleoside-triphosphate phosphatase	IPR003593 (SMART); IPR013525 (PFAM); IPR003439 (PFAM); IPR013581 (PFAM); G3DSA:3.40.50.300 (GENE3D); PTHR19241 (PANTHER); PTHR19241:SF280 (PANTHER); TRANSMEMBRANE (PHOBIUS); TRANSMEMBRANE (PHOBIUS); NON_CYTOPLASMIC_DOMAIN (PHOBIUS); TRANSMEMBRANE (PHOBIUS); CYTOPLASMIC_DOMAIN (PHOBIUS); CYTOPLASMIC_DOMAIN (PHOBIUS); TRANSMEMBRANE (PHOBIUS); NON_CYTOPLASMIC_DOMAIN (PHOBIUS); CYTOPLASMIC_DOMAIN (PH…	F:GO:0005524; C:GO:0016020	F:ATP binding; C:membrane
TRINITY_DN58340_c0_g1_i1	RecName: Full=Protein RESPONSE TO LOW SULFUR 4	91	4	2.08484e-19	70.56	12	P:GO:0002229; P:GO:0009651; P:GO:0009658; P:GO:0009909; P:GO:0010438; P:GO:0031347; P:GO:0042742; P:GO:0045893; P:GO:0047484; P:GO:0048587; P:GO:0098869; F:GO:0005515	P:defense response to oomycetes; P:response to salt stress; P:chloroplast organization; P:regulation of flower development; P:cellular response to sulfur starvation; P:regulation of defense response; P:defense response to bacterium; P:positive regulation of transcription, DNA-templated; P:regulation of response to osmotic stress; P:regulation of short-day photoperiodism, flowering; P:cellular oxi…			Coil (COILS); Coil (COILS); PTHR34283:SF1 (PANTHER); IPR039282 (PANTHER)	P:GO:0098869	P:cellular oxidant detoxification
TRINITY_DN60954_c0_g2_i1	RecName: Full=Protein RESPONSE TO LOW SULFUR 2; AltName: Full=Protein ENHANCED DE-ETIOLATION 6	101	4	2.8857e-09	74.94	12	P:GO:0002229; P:GO:0009651; P:GO:0009658; P:GO:0009909; P:GO:0010438; P:GO:0031347; P:GO:0042742; P:GO:0045893; P:GO:0047484; P:GO:0048587; P:GO:0098869; F:GO:0005515	P:defense response to oomycetes; P:response to salt stress; P:chloroplast organization; P:regulation of flower development; P:cellular response to sulfur starvation; P:regulation of defense response; P:defense response to bacterium; P:positive regulation of transcription, DNA-templated; P:regulation of response to osmotic stress; P:regulation of short-day photoperiodism, flowering; P:cellular oxi…			Coil (COILS); IPR039282 (PANTHER); PTHR34283:SF1 (PANTHER)	P:GO:0098869	P:cellular oxidant detoxification
TRINITY_DN91349_c1_g11_i6	RecName: Full=Putative disease resistance protein RGA3; AltName: Full=Blight resistance protein B149; AltName: Full=RGA1-blb	90	5	4.32537e-07	54.58	3	P:GO:0006952; F:GO:0005524; F:GO:0043531	P:defense response; F:ATP binding; F:ADP binding			no IPS match	no IPS match	no IPS match
TRINITY_DN91349_c1_g11_i5	RecName: Full=Putative disease resistance protein RGA3; AltName: Full=Blight resistance protein B149; AltName: Full=RGA1-blb	94	5	4.23574e-07	55.13	3	P:GO:0006952; F:GO:0005524; F:GO:0043531	P:defense response; F:ATP binding; F:ADP binding			no IPS match	no IPS match	no IPS match
TRINITY_DN89113_c1_g1_i1	RecName: Full=Cytochrome P450 71A22	498	20	2.24809e-179	68.75	17	P:GO:0006952; P:GO:0009835; P:GO:0016114; P:GO:0035835; P:GO:0051762; P:GO:0055114; F:GO:0005506; F:GO:0005515; F:GO:0020037; F:GO:0047720; F:GO:0102627; F:GO:0102628; F:GO:0102876; C:GO:0005789; C:GO:0005794; C:GO:0009506; C:GO:0016021	P:defense response; P:fruit ripening; P:terpenoid biosynthetic process; P:indole alkaloid biosynthetic process; P:sesquiterpene biosynthetic process; P:oxidation-reduction process; F:iron ion binding; F:protein binding; F:heme binding; F:indoleacetaldoxime dehydratase activity; F:parthenolide 3beta-hydroxylase activity; F:costunolide 3beta-hydroxylase activity; F:psoralen synthase activity; C:end…	EC:1.14.13; EC:4.99.1.6; EC:1.14.14.141	Acting on paired donors, with incorporation or reduction of molecular oxygen. The oxygen incorporated need not be derived from O(2); Indoleacetaldoxime dehydratase; Psoralen synthase	Coil (COILS); IPR001128 (PRINTS); IPR002401 (PRINTS); IPR036396 (G3DSA:1.10.630.GENE3D); IPR001128 (PFAM); PTHR47956:SF4 (PANTHER); PTHR47956 (PANTHER); IPR017972 (PROSITE_PATTERNS); CYTOPLASMIC_DOMAIN (PHOBIUS); TRANSMEMBRANE (PHOBIUS); NON_CYTOPLASMIC_DOMAIN (PHOBIUS); IPR036396 (SUPERFAMILY); TMhelix (TMHMM)	P:GO:0055114; F:GO:0005506; F:GO:0016705; F:GO:0020037	P:oxidation-reduction process; F:iron ion binding; F:oxidoreductase activity, acting on paired donors, with incorporation or reduction of molecular oxygen; F:heme binding
TRINITY_DN89113_c1_g1_i2	RecName: Full=Cytochrome P450 71A22	511	20	1.85887e-173	68.83	16	P:GO:0006952; P:GO:0009835; P:GO:0016114; P:GO:0035835; P:GO:0051762; P:GO:0055114; F:GO:0005506; F:GO:0005515; F:GO:0020037; F:GO:0047720; F:GO:0102627; F:GO:0102628; C:GO:0005789; C:GO:0005794; C:GO:0009506; C:GO:0016021	P:defense response; P:fruit ripening; P:terpenoid biosynthetic process; P:indole alkaloid biosynthetic process; P:sesquiterpene biosynthetic process; P:oxidation-reduction process; F:iron ion binding; F:protein binding; F:heme binding; F:indoleacetaldoxime dehydratase activity; F:parthenolide 3beta-hydroxylase activity; F:costunolide 3beta-hydroxylase activity; C:endoplasmic reticulum membrane; C…	EC:1.14.13; EC:4.99.1.6	Acting on paired donors, with incorporation or reduction of molecular oxygen. The oxygen incorporated need not be derived from O(2); Indoleacetaldoxime dehydratase	Coil (COILS); IPR001128 (PRINTS); IPR002401 (PRINTS); IPR036396 (G3DSA:1.10.630.GENE3D); IPR001128 (PFAM); PTHR47955 (PANTHER); IPR017972 (PROSITE_PATTERNS); TRANSMEMBRANE (PHOBIUS); CYTOPLASMIC_DOMAIN (PHOBIUS); NON_CYTOPLASMIC_DOMAIN (PHOBIUS); IPR036396 (SUPERFAMILY); TMhelix (TMHMM)	P:GO:0055114; F:GO:0005506; F:GO:0016705; F:GO:0020037	P:oxidation-reduction process; F:iron ion binding; F:oxidoreductase activity, acting on paired donors, with incorporation or reduction of molecular oxygen; F:heme binding
TRINITY_DN76514_c0_g1_i2	RecName: Full=9-beta-pimara-7,15-diene synthase, chloroplastic; AltName: Full=Ent-kaurene synthase-like 4; Short=OsKS4; Short=OsKSL4; AltName: Full=OsDTS2; AltName: Full=Syn-pimara-7,15-diene synthase; Flags: Precursor	788	20	0	65.02	19	P:GO:0006952; P:GO:0009686; P:GO:0009740; P:GO:0051502; P:GO:1902242; P:GO:1902246; F:GO:0000287; F:GO:0009899; F:GO:0016787; F:GO:0034277; F:GO:0034279; F:GO:0034280; F:GO:0034282; F:GO:0102060; F:GO:0102061; F:GO:0102062; C:GO:0009570; C:GO:0016021; C:GO:0031969	P:defense response; P:gibberellin biosynthetic process; P:gibberellic acid mediated signaling pathway; P:diterpene phytoalexin biosynthetic process; P:copal-8-ol diphosphate(3-) catabolic process; P:cis-abienol biosynthetic process; F:magnesium ion binding; F:ent-kaurene synthase activity; F:hydrolase activity; F:ent-cassa-12,15-diene synthase activity; F:syn-pimara-7,15-diene synthase activity; …	EC:4.2.3.54; EC:4.2.3.35; EC:4.2.3.50; EC:4.2.3.30; EC:4.2.3.53; EC:4.2.3.29; EC:4.2.3.19; EC:4.2.3.28	(-)-endo-alpha-bergamotene synthase ((2Z,6Z)-farnesyl diphosphate; Syn-pimara-7,15-diene synthase; (+)-alpha-santalene synthase ((2Z,6Z)-farnesyl diphosphate cyclizing); Ent-pimara-8(14),15-diene synthase; (+)-endo-beta-bergamotene synthase ((2Z,6Z)-farnesyl diphosphate; Ent-sandaracopimaradiene synthase; Ent-kaurene synthase; Ent-cassa-12,15-diene synthase	IPR036965 (G3DSA:1.50.10.GENE3D); IPR005630 (PFAM); IPR008949 (G3DSA:1.10.600.GENE3D); IPR001906 (PFAM); G3DSA:1.50.10.160 (GENE3D),SFLDG01014 (SFLD),SFLDG01019 (SFLD),SFLDS00005 (SFLD); IPR034741 (PTHR31739:PANTHER); PTHR31739 (PANTHER); NON_CYTOPLASMIC_DOMAIN (PHOBIUS); TRANSMEMBRANE (PHOBIUS); CYTOPLASMIC_DOMAIN (PHOBIUS); cd00684 (CDD); IPR008930 (SUPERFAMILY); IPR008930 (SUPERFAMILY); IPR008…	F:GO:0000287; F:GO:0010333; F:GO:0016829	F:magnesium ion binding; F:terpene synthase activity; F:lyase activity
TRINITY_DN79554_c0_g1_i1	RecName: Full=9-beta-pimara-7,15-diene synthase, chloroplastic; AltName: Full=Ent-kaurene synthase-like 4; Short=OsKS4; Short=OsKSL4; AltName: Full=OsDTS2; AltName: Full=Syn-pimara-7,15-diene synthase; Flags: Precursor	483	20	4.39056e-140	64.21	20	P:GO:0006952; P:GO:0009686; P:GO:0009740; P:GO:0051502; P:GO:1902242; P:GO:1902246; F:GO:0000287; F:GO:0009899; F:GO:0016787; F:GO:0034277; F:GO:0034278; F:GO:0034279; F:GO:0034280; F:GO:0034282; F:GO:0102060; F:GO:0102061; F:GO:0102062; C:GO:0009570; C:GO:0016021; C:GO:0031969	P:defense response; P:gibberellin biosynthetic process; P:gibberellic acid mediated signaling pathway; P:diterpene phytoalexin biosynthetic process; P:copal-8-ol diphosphate(3-) catabolic process; P:cis-abienol biosynthetic process; F:magnesium ion binding; F:ent-kaurene synthase activity; F:hydrolase activity; F:ent-cassa-12,15-diene synthase activity; F:stemar-13-ene synthase activity; F:syn-pi…	EC:4.2.3.54; EC:4.2.3.33; EC:4.2.3.35; EC:4.2.3.50; EC:4.2.3.30; EC:4.2.3.53; EC:4.2.3.29; EC:4.2.3.19; EC:4.2.3.28	(-)-endo-alpha-bergamotene synthase ((2Z,6Z)-farnesyl diphosphate; Stemar-13-ene synthase; Syn-pimara-7,15-diene synthase; (+)-alpha-santalene synthase ((2Z,6Z)-farnesyl diphosphate cyclizing); Ent-pimara-8(14),15-diene synthase; (+)-endo-beta-bergamotene synthase ((2Z,6Z)-farnesyl diphosphate; Ent-sandaracopimaradiene synthase; Ent-kaurene synthase; Ent-cassa-12,15-diene synthase	IPR036965 (G3DSA:1.50.10.GENE3D); G3DSA:1.50.10.160 (GENE3D); IPR001906 (PFAM); PTHR31739:SF34 (PANTHER); PTHR31739 (PANTHER); IPR008930 (SUPERFAMILY); IPR008930 (SUPERFAMILY)	F:GO:0010333; F:GO:0016829	F:terpene synthase activity; F:lyase activity
TRINITY_DN89867_c0_g1_i3	RecName: Full=G-type lectin S-receptor-like serine/threonine-protein kinase LECRK4; Short=OsLecRK4; AltName: Full=OsRLCK136; Flags: Precursor	567	20	0	64.44	12	P:GO:0006952; P:GO:0046777; P:GO:0048544; F:GO:0004674; F:GO:0005516; F:GO:0005524; F:GO:0030246; F:GO:0031625; C:GO:0005886; C:GO:0009506; C:GO:0009514; C:GO:0016021	P:defense response; P:protein autophosphorylation; P:recognition of pollen; F:protein serine/threonine kinase activity; F:calmodulin binding; F:ATP binding; F:carbohydrate binding; F:ubiquitin protein ligase binding; C:plasma membrane; C:plasmodesma; C:glyoxysome; C:integral component of membrane	EC:2.7.11	Transferring phosphorus-containing groups	IPR000719 (SMART); IPR000719 (PFAM); G3DSA:1.10.510.10 (GENE3D); G3DSA:3.30.200.20 (GENE3D); PTHR47976:SF26 (PANTHER); PTHR47976 (PANTHER); IPR017441 (PROSITE_PATTERNS); IPR008271 (PROSITE_PATTERNS); TRANSMEMBRANE (PHOBIUS); NON_CYTOPLASMIC_DOMAIN (PHOBIUS); CYTOPLASMIC_DOMAIN (PHOBIUS); IPR003609 (PROSITE_PROFILES); IPR000719 (PROSITE_PROFILES); cd14066 (CDD); IPR011009 (SUPERFAMILY); TMhelix (T…	P:GO:0006468; F:GO:0004672; F:GO:0005524	P:protein phosphorylation; F:protein kinase activity; F:ATP binding
TRINITY_DN86179_c0_g1_i2	RecName: Full=Protein trichome birefringence-like 3	172	20	2.44827e-87	61.12	19	P:GO:0006952; P:GO:0009414; P:GO:0009620; P:GO:0009651; P:GO:0009827; P:GO:0009834; P:GO:0030244; P:GO:0045489; P:GO:0045492; P:GO:0045893; P:GO:0050826; P:GO:1990937; F:GO:1990538; C:GO:0000139; C:GO:0005768; C:GO:0005783; C:GO:0005802; C:GO:0005886; C:GO:0016021	P:defense response; P:response to water deprivation; P:response to fungus; P:response to salt stress; P:plant-type cell wall modification; P:plant-type secondary cell wall biogenesis; P:cellulose biosynthetic process; P:pectin biosynthetic process; P:xylan biosynthetic process; P:positive regulation of transcription, DNA-templated; P:response to freezing; P:xylan acetylation; F:xylan O-acetyltran…			IPR026057 (PFAM); IPR029962 (PANTHER); PTHR32285:SF179 (PANTHER)	no GO terms	no GO terms
TRINITY_DN86637_c1_g1_i4	RecName: Full=12-oxophytodienoate reductase 3; AltName: Full=12-oxophytodienoate-10,11-reductase 3; Short=OPDA-reductase 3; AltName: Full=LeOPR3	74	20	5.59661e-31	72.4	15	P:GO:0006952; P:GO:0009611; P:GO:0009620; P:GO:0009695; P:GO:0010193; P:GO:0031408; P:GO:0048443; P:GO:0055114; F:GO:0003959; F:GO:0010181; F:GO:0016629; F:GO:0018548; F:GO:0042802; C:GO:0005777; C:GO:0005829	P:defense response; P:response to wounding; P:response to fungus; P:jasmonic acid biosynthetic process; P:response to ozone; P:oxylipin biosynthetic process; P:stamen development; P:oxidation-reduction process; F:NADPH dehydrogenase activity; F:FMN binding; F:12-oxophytodienoate reductase activity; F:pentaerythritol trinitrate reductase activity; F:identical protein binding; C:peroxisome; C:cytos…	EC:1.3.1.42; EC:1.6.99.1	12-oxophytodienoate reductase; NADPH dehydrogenase	IPR013785 (G3DSA:3.20.20.GENE3D); IPR001155 (PFAM); PTHR22893 (PANTHER); PTHR22893:SF112 (PANTHER); SSF51395 (SUPERFAMILY)	P:GO:0055114; F:GO:0003824; F:GO:0010181; F:GO:0016491	P:oxidation-reduction process; F:catalytic activity; F:FMN binding; F:oxidoreductase activity
TRINITY_DN75796_c0_g1_i2	RecName: Full=Protein MKS1; AltName: Full=Protein MAP kinase 4 substrate 1; AltName: Full=VQ motif-containing protein 21; Short=AtVQ21	208	4	3.64336e-32	50.19	7	P:GO:0006952; P:GO:0007165; P:GO:0080092; F:GO:0003723; F:GO:0005515; C:GO:0005634; C:GO:0009507	P:defense response; P:signal transduction; P:regulation of pollen tube growth; F:RNA binding; F:protein binding; C:nucleus; C:chloroplast			IPR008889 (PFAM); mobidb-lite (MOBIDB_LITE); mobidb-lite (MOBIDB_LITE); mobidb-lite (MOBIDB_LITE); mobidb-lite (MOBIDB_LITE); IPR039607 (PANTHER); PTHR33143:SF50 (PANTHER)	no GO terms	no GO terms
TRINITY_DN89113_c1_g1_i6	RecName: Full=Cytochrome P450 71A22	320	20	4.92978e-101	67.81	16	P:GO:0006952; P:GO:0016114; P:GO:0035835; P:GO:0051762; P:GO:0055114; F:GO:0005506; F:GO:0005515; F:GO:0020037; F:GO:0047720; F:GO:0102627; F:GO:0102628; F:GO:0102876; C:GO:0005789; C:GO:0005794; C:GO:0009506; C:GO:0016021	P:defense response; P:terpenoid biosynthetic process; P:indole alkaloid biosynthetic process; P:sesquiterpene biosynthetic process; P:oxidation-reduction process; F:iron ion binding; F:protein binding; F:heme binding; F:indoleacetaldoxime dehydratase activity; F:parthenolide 3beta-hydroxylase activity; F:costunolide 3beta-hydroxylase activity; F:psoralen synthase activity; C:endoplasmic reticulum…	EC:1.14.13; EC:4.99.1.6; EC:1.14.14.141	Acting on paired donors, with incorporation or reduction of molecular oxygen. The oxygen incorporated need not be derived from O(2); Indoleacetaldoxime dehydratase; Psoralen synthase	IPR002401 (PRINTS); IPR001128 (PFAM); IPR036396 (G3DSA:1.10.630.GENE3D); PTHR47955 (PANTHER); NON_CYTOPLASMIC_DOMAIN (PHOBIUS); TRANSMEMBRANE (PHOBIUS); CYTOPLASMIC_DOMAIN (PHOBIUS); IPR036396 (SUPERFAMILY); TMhelix (TMHMM)	P:GO:0055114; F:GO:0005506; F:GO:0016705; F:GO:0020037	P:oxidation-reduction process; F:iron ion binding; F:oxidoreductase activity, acting on paired donors, with incorporation or reduction of molecular oxygen; F:heme binding
TRINITY_DN89015_c0_g1_i1	RecName: Full=G-type lectin S-receptor-like serine/threonine-protein kinase LECRK3; Short=OsLecRK3; AltName: Full=OsRLCK135; Flags: Precursor	407	20	1.94294e-160	67.61	26	P:GO:0006952; P:GO:0007178; P:GO:0007639; P:GO:0009729; P:GO:0009742; P:GO:0010150; P:GO:0010200; P:GO:0018108; P:GO:0046777; P:GO:0048544; P:GO:0048653; P:GO:0060548; P:GO:1900140; F:GO:0004675; F:GO:0004714; F:GO:0005516; F:GO:0005524; F:GO:0015026; F:GO:0030246; F:GO:0031625; F:GO:0033612; F:GO:0042803; C:GO:0005886; C:GO:0009506; C:GO:0009514; C:GO:0016021	P:defense response; P:transmembrane receptor protein serine/threonine kinase signaling pathway; P:homeostasis of number of meristem cells; P:detection of brassinosteroid stimulus; P:brassinosteroid mediated signaling pathway; P:leaf senescence; P:response to chitin; P:peptidyl-tyrosine phosphorylation; P:protein autophosphorylation; P:recognition of pollen; P:anther development; P:negative regula…	EC:2.7.10; EC:2.7.10.1; EC:2.7.11; EC:2.7.11.30	Transferring phosphorus-containing groups; Receptor protein-tyrosine kinase; Transferring phosphorus-containing groups; Receptor protein serine/threonine kinase	IPR000719 (SMART); G3DSA:1.10.510.10 (GENE3D); IPR000719 (PFAM); G3DSA:3.30.200.20 (GENE3D); PTHR47976 (PANTHER); PTHR47976:SF26 (PANTHER); IPR017441 (PROSITE_PATTERNS); IPR008271 (PROSITE_PATTERNS); CYTOPLASMIC_DOMAIN (PHOBIUS); NON_CYTOPLASMIC_DOMAIN (PHOBIUS); TRANSMEMBRANE (PHOBIUS); IPR003609 (PROSITE_PROFILES); IPR000719 (PROSITE_PROFILES); IPR011009 (SUPERFAMILY); TMhelix (TMHMM)	P:GO:0006468; F:GO:0004672; F:GO:0005524	P:protein phosphorylation; F:protein kinase activity; F:ATP binding
TRINITY_DN66228_c0_g1_i1	RecName: Full=Cytochrome P450 71B10	434	20	4.37964e-169	70.84	10	P:GO:0010132; P:GO:0010286; P:GO:0055114; F:GO:0005506; F:GO:0005515; F:GO:0020037; F:GO:0050592; C:GO:0005789; C:GO:0005886; C:GO:0016021	P:dhurrin biosynthetic process; P:heat acclimation; P:oxidation-reduction process; F:iron ion binding; F:protein binding; F:heme binding; F:4-hydroxyphenylacetaldehyde oxime monooxygenase activity; C:endoplasmic reticulum membrane; C:plasma membrane; C:integral component of membrane	EC:1.14.13; EC:1.14.14.37	Acting on paired donors, with incorporation or reduction of molecular oxygen. The oxygen incorporated need not be derived from O(2); 4-hydroxyphenylacetaldehyde oxime monooxygenase	IPR001128 (PRINTS); IPR002401 (PRINTS); IPR036396 (G3DSA:1.10.630.GENE3D); IPR001128 (PFAM); PTHR47956:SF5 (PANTHER); PTHR47956 (PANTHER); IPR017972 (PROSITE_PATTERNS); TRANSMEMBRANE (PHOBIUS); SIGNAL_PEPTIDE (PHOBIUS); SIGNAL_PEPTIDE_C_REGION (PHOBIUS); NON_CYTOPLASMIC_DOMAIN (PHOBIUS); CYTOPLASMIC_DOMAIN (PHOBIUS); SIGNAL_PEPTIDE_N_REGION (PHOBIUS); SIGNAL_PEPTIDE_H_REGION (PHOBIUS); IPR036396 …	P:GO:0055114; F:GO:0005506; F:GO:0016705; F:GO:0020037	P:oxidation-reduction process; F:iron ion binding; F:oxidoreductase activity, acting on paired donors, with incorporation or reduction of molecular oxygen; F:heme binding
TRINITY_DN91401_c0_g1_i9	RecName: Full=Phospholipase A2 group XV; AltName: Full=1-O-acylceramide synthase; Short=ACS; AltName: Full=LCAT-like lysophospholipase; Short=LLPL; AltName: Full=Lysophospholipase 3; AltName: Full=Lysosomal phospholipase A and acyltransferase; AltName: Full=Lysosomal phospholipase A2; Short=LPLA2; Flags: Precursor	641	17	0	45.65	45	P:GO:0006651; P:GO:0006656; P:GO:0006672; P:GO:0008203; P:GO:0009062; P:GO:0010150; P:GO:0010884; P:GO:0016127; P:GO:0019432; P:GO:0030301; P:GO:0034372; P:GO:0034375; P:GO:0034434; P:GO:0034638; P:GO:0042158; P:GO:0042632; P:GO:0046338; P:GO:0046688; P:GO:0051384; P:GO:0055091; P:GO:0090107; P:GO:0140042; F:GO:0004607; F:GO:0004622; F:GO:0005543; F:GO:0008970; F:GO:0016411; F:GO:0034186; F:GO:00…	P:diacylglycerol biosynthetic process; P:phosphatidylcholine biosynthetic process; P:ceramide metabolic process; P:cholesterol metabolic process; P:fatty acid catabolic process; P:leaf senescence; P:positive regulation of lipid storage; P:sterol catabolic process; P:triglyceride biosynthetic process; P:cholesterol transport; P:very-low-density lipoprotein particle remodeling; P:high-density lipop…	EC:2.3.1.43; EC:3.1.1.32; EC:3.1.1.5; EC:2.3.1.158; EC:3.1.1.1; EC:2.3.1.149; EC:3.1.1.4	Phosphatidylcholine--sterol O-acyltransferase; Phospholipase A(1); Lysophospholipase; Phospholipid:diacylglycerol acyltransferase; Carboxylesterase; Platelet-activating factor acetyltransferase; Phospholipase A(2)	IPR029058 (G3DSA:3.40.50.GENE3D); IPR003386 (PFAM); PTHR11440:SF86 (PANTHER); PTHR11440 (PANTHER); NON_CYTOPLASMIC_DOMAIN (PHOBIUS); SIGNAL_PEPTIDE_C_REGION (PHOBIUS); SIGNAL_PEPTIDE (PHOBIUS); SIGNAL_PEPTIDE_N_REGION (PHOBIUS); SIGNAL_PEPTIDE_H_REGION (PHOBIUS); SignalP-noTM (SIGNALP_EUK); IPR029058 (SUPERFAMILY); TMhelix (TMHMM)	P:GO:0006629; F:GO:0008374	P:lipid metabolic process; F:O-acyltransferase activity
TRINITY_DN84195_c0_g1_i4	RecName: Full=DNA polymerase alpha-associated DNA helicase A	527	20	5.02315e-96	52.02	92	P:GO:0000076; P:GO:0000122; P:GO:0000294; P:GO:0000729; P:GO:0006264; P:GO:0006284; P:GO:0006310; P:GO:0006406; P:GO:0006449; P:GO:0008298; P:GO:0009048; P:GO:0009553; P:GO:0009611; P:GO:0009863; P:GO:0009867; P:GO:0009875; P:GO:0010182; P:GO:0010183; P:GO:0016246; P:GO:0016567; P:GO:0021522; P:GO:0030466; P:GO:0030538; P:GO:0032204; P:GO:0032508; P:GO:0033567; P:GO:0034660; P:GO:0035195; P:GO:00…	P:DNA replication checkpoint; P:negative regulation of transcription by RNA polymerase II; P:nuclear-transcribed mRNA catabolic process, endonucleolytic cleavage-dependent decay; P:DNA double-strand break processing; P:mitochondrial DNA replication; P:base-excision repair; P:DNA recombination; P:mRNA export from nucleus; P:regulation of translational termination; P:intracellular mRNA localization…	EC:3.1.30; EC:3.6.1.3; EC:3.1.21; EC:3.6.4.12; EC:3.6.4.13; EC:3.1.25; EC:3.6.1.15	Acting on ester bonds; Adenosinetriphosphatase; Acting on ester bonds; DNA helicase; RNA helicase; Acting on ester bonds; Nucleoside-triphosphate phosphatase	IPR014001 (SMART); G3DSA:3.40.50.300 (GENE3D); IPR041677 (PFAM); G3DSA:3.40.50.300 (GENE3D); IPR041679 (PFAM); PTHR43788 (PANTHER); PTHR43788:SF3 (PANTHER); IPR041679 (CDD); cd18044 (CDD); IPR027417 (SUPERFAMILY)	F:GO:0004386	F:helicase activity
TRINITY_DN83439_c0_g1_i1	RecName: Full=DNA polymerase alpha-associated DNA helicase A	981	20	1.43003e-98	50.7	92	P:GO:0000076; P:GO:0000122; P:GO:0000294; P:GO:0000729; P:GO:0006264; P:GO:0006284; P:GO:0006310; P:GO:0006406; P:GO:0006449; P:GO:0008298; P:GO:0009048; P:GO:0009553; P:GO:0009611; P:GO:0009863; P:GO:0009867; P:GO:0009875; P:GO:0010182; P:GO:0010183; P:GO:0016246; P:GO:0016567; P:GO:0021522; P:GO:0030466; P:GO:0030538; P:GO:0032204; P:GO:0032508; P:GO:0033567; P:GO:0034660; P:GO:0035195; P:GO:00…	P:DNA replication checkpoint; P:negative regulation of transcription by RNA polymerase II; P:nuclear-transcribed mRNA catabolic process, endonucleolytic cleavage-dependent decay; P:DNA double-strand break processing; P:mitochondrial DNA replication; P:base-excision repair; P:DNA recombination; P:mRNA export from nucleus; P:regulation of translational termination; P:intracellular mRNA localization…	EC:3.1.30; EC:3.6.1.3; EC:3.1.21; EC:3.6.4.12; EC:3.6.4.13; EC:3.1.25; EC:3.6.1.15	Acting on ester bonds; Adenosinetriphosphatase; Acting on ester bonds; DNA helicase; RNA helicase; Acting on ester bonds; Nucleoside-triphosphate phosphatase	IPR014001 (SMART); G3DSA:2.40.30.270 (GENE3D); IPR041679 (PFAM); G3DSA:3.40.50.300 (GENE3D); G3DSA:3.40.50.300 (GENE3D); IPR041677 (PFAM); PTHR43788 (PANTHER); PTHR43788:SF3 (PANTHER); cd18044 (CDD); IPR041679 (CDD); IPR027417 (SUPERFAMILY)	F:GO:0004386	F:helicase activity
TRINITY_DN69747_c0_g1_i1	RecName: Full=Chaperone protein DnaJ	259	20	2.55046e-81	71.23	16	P:GO:0006260; P:GO:0009408; P:GO:0042026; P:GO:0051085; F:GO:0003681; F:GO:0005524; F:GO:0008270; F:GO:0031072; F:GO:0048038; F:GO:0051082; F:GO:0051087; C:GO:0005829; C:GO:0009295; C:GO:0009535; C:GO:0010598; C:GO:0016021	P:DNA replication; P:response to heat; P:protein refolding; P:chaperone cofactor-dependent protein refolding; F:bent DNA binding; F:ATP binding; F:zinc ion binding; F:heat shock protein binding; F:quinone binding; F:unfolded protein binding; F:chaperone binding; C:cytosol; C:nucleoid; C:chloroplast thylakoid membrane; C:NAD(P)H dehydrogenase complex (plastoquinone); C:integral component of membra…			IPR001623 (PRINTS); IPR001623 (SMART); IPR036869 (G3DSA:1.10.287.GENE3D); IPR001623 (PFAM); mobidb-lite (MOBIDB_LITE); mobidb-lite (MOBIDB_LITE); PTHR45283 (PANTHER); IPR018253 (PROSITE_PATTERNS); CYTOPLASMIC_DOMAIN (PHOBIUS); NON_CYTOPLASMIC_DOMAIN (PHOBIUS); TRANSMEMBRANE (PHOBIUS); IPR001623 (PROSITE_PROFILES); IPR001623 (CDD); IPR036869 (SUPERFAMILY); TMhelix (TMHMM)	no GO terms	no GO terms
TRINITY_DN89496_c2_g1_i1	RecName: Full=Chaperone protein DnaJ	222	20	7.98664e-57	73.34	30	P:GO:0006260; P:GO:0006364; P:GO:0009408; P:GO:0010322; P:GO:0030036; P:GO:0030198; P:GO:0032781; P:GO:0032880; P:GO:0034504; P:GO:0042026; P:GO:0043154; P:GO:0045109; P:GO:0045892; P:GO:0051085; P:GO:0060717; P:GO:0090084; P:GO:1902395; F:GO:0001671; F:GO:0003677; F:GO:0005524; F:GO:0008270; F:GO:0031072; F:GO:0044183; F:GO:0051082; F:GO:0051087; C:GO:0005654; C:GO:0005829; C:GO:0009570; C:GO:00…	P:DNA replication; P:rRNA processing; P:response to heat; P:regulation of isopentenyl diphosphate biosynthetic process, methylerythritol 4-phosphate pathway; P:actin cytoskeleton organization; P:extracellular matrix organization; P:positive regulation of ATPase activity; P:regulation of protein localization; P:protein localization to nucleus; P:protein refolding; P:negative regulation of cysteine…			IPR001623 (PRINTS); IPR001623 (SMART); IPR036869 (G3DSA:1.10.287.GENE3D); IPR001623 (PFAM); PTHR45090:SF4 (PANTHER); PTHR45090 (PANTHER); IPR018253 (PROSITE_PATTERNS); IPR001623 (PROSITE_PROFILES); IPR001623 (CDD); IPR036869 (SUPERFAMILY)	no GO terms	no GO terms
TRINITY_DN71335_c4_g1_i1	RecName: Full=Protein NRT1/ PTR FAMILY 2.13; Short=AtNPF2.13; AltName: Full=Nitrate transporter 1.7	511	20	0	60.41	27	P:GO:0009793; P:GO:0009860; P:GO:0010098; P:GO:0010336; P:GO:0010447; P:GO:0010584; P:GO:0015031; P:GO:0035672; P:GO:0042128; P:GO:0042938; P:GO:0042939; P:GO:0043562; P:GO:0071472; P:GO:0080167; P:GO:0090408; P:GO:0090449; F:GO:0010542; F:GO:0015334; F:GO:0042937; F:GO:0080054; F:GO:0090448; C:GO:0005794; C:GO:0005886; C:GO:0009506; C:GO:0009705; C:GO:0016021; C:GO:0097708	P:embryo development ending in seed dormancy; P:pollen tube growth; P:suspensor development; P:gibberellic acid homeostasis; P:response to acidic pH; P:pollen exine formation; P:protein transport; P:oligopeptide transmembrane transport; P:nitrate assimilation; P:dipeptide transport; P:tripeptide transport; P:cellular response to nitrogen levels; P:cellular response to salt stress; P:response to k…			IPR000109 (PFAM); IPR000109 (PANTHER); PTHR11654:SF378 (PANTHER); NON_CYTOPLASMIC_DOMAIN (PHOBIUS); NON_CYTOPLASMIC_DOMAIN (PHOBIUS); TRANSMEMBRANE (PHOBIUS); NON_CYTOPLASMIC_DOMAIN (PHOBIUS); CYTOPLASMIC_DOMAIN (PHOBIUS); NON_CYTOPLASMIC_DOMAIN (PHOBIUS); TRANSMEMBRANE (PHOBIUS); TRANSMEMBRANE (PHOBIUS); CYTOPLASMIC_DOMAIN (PHOBIUS); TRANSMEMBRANE (PHOBIUS); CYTOPLASMIC_DOMAIN (PHOBIUS); CYTOPLA…	P:GO:0055085; F:GO:0022857; C:GO:0016020	P:transmembrane transport; F:transmembrane transporter activity; C:membrane
TRINITY_DN87496_c0_g2_i5	RecName: Full=Boron transporter 1	671	20	0	59.2	62	P:GO:0002064; P:GO:0003073; P:GO:0006623; P:GO:0006821; P:GO:0007283; P:GO:0007596; P:GO:0007623; P:GO:0009414; P:GO:0010037; P:GO:0010446; P:GO:0010447; P:GO:0010468; P:GO:0014823; P:GO:0015701; P:GO:0017121; P:GO:0033326; P:GO:0035445; P:GO:0035725; P:GO:0035811; P:GO:0042044; P:GO:0042102; P:GO:0042542; P:GO:0045852; P:GO:0046685; P:GO:0048311; P:GO:0048364; P:GO:0048565; P:GO:0048821; P:GO:00…	P:epithelial cell development; P:regulation of systemic arterial blood pressure; P:protein targeting to vacuole; P:chloride transport; P:spermatogenesis; P:blood coagulation; P:circadian rhythm; P:response to water deprivation; P:response to carbon dioxide; P:response to alkaline pH; P:response to acidic pH; P:regulation of gene expression; P:response to activity; P:bicarbonate transport; P:plasm…			Coil (COILS); IPR011531 (PFAM); IPR003020 (PANTHER); PTHR11453:SF40 (PANTHER); NON_CYTOPLASMIC_DOMAIN (PHOBIUS); NON_CYTOPLASMIC_DOMAIN (PHOBIUS); TRANSMEMBRANE (PHOBIUS); TRANSMEMBRANE (PHOBIUS); TRANSMEMBRANE (PHOBIUS); CYTOPLASMIC_DOMAIN (PHOBIUS); CYTOPLASMIC_DOMAIN (PHOBIUS); CYTOPLASMIC_DOMAIN (PHOBIUS); CYTOPLASMIC_DOMAIN (PHOBIUS); NON_CYTOPLASMIC_DOMAIN (PHOBIUS); CYTOPLASMIC_DOMAIN (PHO…	P:GO:0006820; F:GO:0005452; C:GO:0016020; C:GO:0016021	P:anion transport; F:inorganic anion exchanger activity; C:membrane; C:integral component of membrane
TRINITY_DN29252_c1_g1_i1	RecName: Full=Protein SYM1	374	20	3.1153e-19	46.7	8	P:GO:0006067; P:GO:0048523; P:GO:0061668; P:GO:0070131; F:GO:0005515; C:GO:0005743; C:GO:0005762; C:GO:0005779	P:ethanol metabolic process; P:negative regulation of cellular process; P:mitochondrial ribosome assembly; P:positive regulation of mitochondrial translation; F:protein binding; C:mitochondrial inner membrane; C:mitochondrial large ribosomal subunit; C:integral component of peroxisomal membrane			IPR007248 (PFAM); mobidb-lite (MOBIDB_LITE); PTHR11266:SF76 (PANTHER); IPR007248 (PANTHER)	C:GO:0016021	C:integral component of membrane
TRINITY_DN92141_c4_g1_i7	RecName: Full=Palmitoyl-acyl carrier protein thioesterase, chloroplastic; AltName: Full=16:0-acyl-carrier protein thioesterase; Short=16:0-ACP thioesterase; AltName: Full=Acyl-[acyl-carrier-protein] hydrolase; AltName: Full=PATE; Flags: Precursor	108	11	2.89134e-45	63.63	7	P:GO:0006633; F:GO:0000036; F:GO:0004320; F:GO:0016295; F:GO:0016296; F:GO:0047381; C:GO:0009507	P:fatty acid biosynthetic process; F:acyl carrier activity; F:oleoyl-[acyl-carrier-protein] hydrolase activity; F:myristoyl-[acyl-carrier-protein] hydrolase activity; F:palmitoyl-[acyl-carrier-protein] hydrolase activity; F:dodecanoyl-[acyl-carrier-protein] hydrolase activity; C:chloroplast	EC:2.3.1.85; EC:3.1.2.14; EC:3.1.2.21	Fatty-acid synthase system; Oleoyl-[acyl-carrier-protein] hydrolase; Dodecanoyl-[acyl-carrier-protein] hydrolase	IPR002864 (PFAM); G3DSA:3.10.129.10 (GENE3D); PTHR31727:SF17 (PANTHER); PTHR31727 (PANTHER); IPR029069 (SUPERFAMILY)	P:GO:0006633; F:GO:0016790	P:fatty acid biosynthetic process; F:thiolester hydrolase activity
TRINITY_DN92017_c1_g1_i6	RecName: Full=Acetyl-coenzyme A synthetase; Short=AcCoA synthetase; Short=Acs; AltName: Full=Acetate--CoA ligase; AltName: Full=Acyl-activating enzyme	725	20	0	46.66	13	P:GO:0006631; P:GO:0009850; P:GO:0018394; P:GO:0034421; P:GO:0045733; F:GO:0003987; F:GO:0032559; F:GO:0033558; F:GO:0043168; F:GO:0043169; F:GO:0050218; C:GO:0005777; C:GO:0005829	P:fatty acid metabolic process; P:auxin metabolic process; P:peptidyl-lysine acetylation; P:post-translational protein acetylation; P:acetate catabolic process; F:acetate-CoA ligase activity; F:adenyl ribonucleotide binding; F:protein deacetylase activity; F:anion binding; F:cation binding; F:propionate-CoA ligase activity; C:peroxisome; C:cytosol	EC:6.2.1.1; EC:6.2.1.17	Acetate--CoA ligase; Propionate--CoA ligase	IPR000873 (PFAM); G3DSA:3.30.300.30 (GENE3D); IPR042099 (G3DSA:3.40.50.GENE3D); PTHR44378:SF2 (PANTHER); PTHR44378 (PANTHER); IPR020845 (PROSITE_PATTERNS); TRANSMEMBRANE (PHOBIUS); CYTOPLASMIC_DOMAIN (PHOBIUS); NON_CYTOPLASMIC_DOMAIN (PHOBIUS); cd05968 (CDD); SSF56801 (SUPERFAMILY); TMhelix (TMHMM)	no GO terms	no GO terms
TRINITY_DN73263_c0_g1_i1	RecName: Full=GDSL esterase/lipase At5g14450; AltName: Full=Extracellular lipase At5g14450; Flags: Precursor	366	20	5.10186e-105	52.91	14	P:GO:0006631; P:GO:0009627; P:GO:0016042; F:GO:0004104; F:GO:0004560; F:GO:0008126; F:GO:0016298; F:GO:0019863; F:GO:0050285; C:GO:0005773; C:GO:0009505; C:GO:0009506; C:GO:0009570; C:GO:0048046	P:fatty acid metabolic process; P:systemic acquired resistance; P:lipid catabolic process; F:cholinesterase activity; F:alpha-L-fucosidase activity; F:acetylesterase activity; F:lipase activity; F:IgE binding; F:sinapine esterase activity; C:vacuole; C:plant-type cell wall; C:plasmodesma; C:chloroplast stroma; C:apoplast	EC:3.1.1.49; EC:3.2.1.51; EC:3.1.1.6; EC:3.1.1.8; EC:3.1.1.1	Sinapine esterase; Alpha-L-fucosidase; Acetylesterase; Cholinesterase; Carboxylesterase	Coil (COILS); IPR001087 (PFAM); IPR036514 (G3DSA:3.40.50.GENE3D); PTHR22835 (PANTHER); PTHR22835:SF514 (PANTHER); NON_CYTOPLASMIC_DOMAIN (PHOBIUS); CYTOPLASMIC_DOMAIN (PHOBIUS); TRANSMEMBRANE (PHOBIUS); IPR035669 (CDD); SSF52266 (SUPERFAMILY); TMhelix (TMHMM)	F:GO:0016788	F:hydrolase activity, acting on ester bonds
TRINITY_DN90759_c2_g1_i3	RecName: Full=Protein DETOXIFICATION 20; Short=AtDTX20; AltName: Full=Multidrug and toxic compound extrusion protein 20; Short=MATE protein 20	254	20	4.062e-81	64.8	13	P:GO:0009813; P:GO:0010023; P:GO:0010231; P:GO:0010252; P:GO:0042908; P:GO:0048767; P:GO:0080167; P:GO:1902600; F:GO:0015299; F:GO:0042910; C:GO:0005886; C:GO:0009705; C:GO:0016021	P:flavonoid biosynthetic process; P:proanthocyanidin biosynthetic process; P:maintenance of seed dormancy; P:auxin homeostasis; P:xenobiotic transport; P:root hair elongation; P:response to karrikin; P:proton transmembrane transport; F:solute:proton antiporter activity; F:xenobiotic transmembrane transporter activity; C:plasma membrane; C:plant-type vacuole membrane; C:integral component of membr…			IPR002528 (PFAM); PTHR11206 (PANTHER); PTHR11206:SF384 (PANTHER); TRANSMEMBRANE (PHOBIUS); NON_CYTOPLASMIC_DOMAIN (PHOBIUS); NON_CYTOPLASMIC_DOMAIN (PHOBIUS); TRANSMEMBRANE (PHOBIUS); CYTOPLASMIC_DOMAIN (PHOBIUS); CYTOPLASMIC_DOMAIN (PHOBIUS); TRANSMEMBRANE (PHOBIUS); TRANSMEMBRANE (PHOBIUS); TRANSMEMBRANE (PHOBIUS); CYTOPLASMIC_DOMAIN (PHOBIUS); NON_CYTOPLASMIC_DOMAIN (PHOBIUS); TMhelix (TMHMM);…	P:GO:0055085; F:GO:0015297; F:GO:0042910; C:GO:0016020	P:transmembrane transport; F:antiporter activity; F:xenobiotic transmembrane transporter activity; C:membrane
TRINITY_DN87270_c3_g2_i2	RecName: Full=ATP-dependent RNA helicase DHX33; AltName: Full=DEAH box protein 33	400	20	0	68.39	35	P:GO:0000349; P:GO:0000390; P:GO:0006413; P:GO:0007281; P:GO:0009793; P:GO:0010172; P:GO:0032481; P:GO:0034247; P:GO:0035194; P:GO:0040022; P:GO:0042254; P:GO:0043410; P:GO:0043484; P:GO:0045943; P:GO:0048589; P:GO:0051092; P:GO:1900227; F:GO:0000182; F:GO:0003724; F:GO:0003725; F:GO:0003729; F:GO:0005524; F:GO:0008186; F:GO:0033613; F:GO:0042802; F:GO:0043023; C:GO:0005730; C:GO:0005739; C:GO:00…	P:generation of catalytic spliceosome for first transesterification step; P:spliceosomal complex disassembly; P:translational initiation; P:germ cell development; P:embryo development ending in seed dormancy; P:embryonic body morphogenesis; P:positive regulation of type I interferon production; P:snoRNA splicing; P:post-transcriptional gene silencing by RNA; P:feminization of hermaphroditic germ-…	EC:3.6.1.3; EC:3.6.4.13; EC:3.6.1.15	Adenosinetriphosphatase; RNA helicase; Nucleoside-triphosphate phosphatase	IPR001650 (SMART); IPR014001 (SMART); G3DSA:3.40.50.300 (GENE3D); IPR001650 (PFAM); mobidb-lite (MOBIDB_LITE); mobidb-lite (MOBIDB_LITE); PTHR18934 (PANTHER); PTHR18934:SF231 (PANTHER); IPR002464 (PROSITE_PATTERNS); IPR014001 (PROSITE_PROFILES); IPR001650 (PROSITE_PROFILES); cd18791 (CDD); cd17978 (CDD); IPR027417 (SUPERFAMILY)	no GO terms	no GO terms
TRINITY_DN91729_c0_g1_i3	RecName: Full=Alanine--glyoxylate aminotransferase 2, mitochondrial; Short=AGT 2; AltName: Full=(R)-3-amino-2-methylpropionate--pyruvate transaminase; AltName: Full=Beta-ALAAT II; AltName: Full=Beta-alanine-pyruvate aminotransferase; AltName: Full=D-AIBAT; Flags: Precursor	487	20	0	63.61	22	P:GO:0006071; P:GO:0006554; P:GO:0006646; P:GO:0009102; P:GO:0009436; P:GO:0009853; P:GO:0019265; P:GO:0019481; P:GO:0030574; P:GO:0035094; P:GO:0035162; P:GO:0043562; P:GO:0045429; P:GO:0046686; F:GO:0004015; F:GO:0008453; F:GO:0030170; F:GO:0042802; F:GO:0047305; F:GO:0047432; F:GO:0050459; C:GO:0005759	P:glycerol metabolic process; P:lysine catabolic process; P:phosphatidylethanolamine biosynthetic process; P:biotin biosynthetic process; P:glyoxylate catabolic process; P:photorespiration; P:glycine biosynthetic process, by transamination of glyoxylate; P:L-alanine catabolic process, by transamination; P:collagen catabolic process; P:response to nicotine; P:embryonic hemopoiesis; P:cellular resp…	EC:2.6.1.44; EC:4.2.3.2; EC:2.6.1.40; EC:2.6.1.62; EC:4.1.1.64	Alanine--glyoxylate transaminase; Ethanolamine-phosphate phospho-lyase; (R)-3-amino-2-methylpropionate--pyruvate transaminase; Adenosylmethionine--8-amino-7-oxononanoate transaminase; 2,2-dialkylglycine decarboxylase (pyruvate)	IPR015421 (G3DSA:3.40.640.GENE3D); IPR015422 (G3DSA:3.90.1150.GENE3D); IPR005814 (PFAM); PTHR45688:SF8 (PANTHER); PTHR45688 (PANTHER); IPR005814 (PROSITE_PATTERNS); IPR005814 (CDD); IPR015424 (SUPERFAMILY)	F:GO:0003824; F:GO:0008483; F:GO:0030170	F:catalytic activity; F:transaminase activity; F:pyridoxal phosphate binding
TRINITY_DN89481_c0_g2_i1	RecName: Full=Extended synaptotagmin-3; Short=E-Syt3	579	6	2.44211e-05	48.61	31	P:GO:0006687; P:GO:0006869; P:GO:0006886; P:GO:0008150; P:GO:0009555; P:GO:0043547; P:GO:0061817; F:GO:0005096; F:GO:0005509; F:GO:0005515; F:GO:0005543; F:GO:0005544; F:GO:0008289; F:GO:0008429; F:GO:0031210; F:GO:0035091; F:GO:0046872; C:GO:0005773; C:GO:0005783; C:GO:0005789; C:GO:0005794; C:GO:0005886; C:GO:0005887; C:GO:0009506; C:GO:0012505; C:GO:0016020; C:GO:0016021; C:GO:0031227; C:GO:00…	P:glycosphingolipid metabolic process; P:lipid transport; P:intracellular protein transport; P:biological_process; P:pollen development; P:positive regulation of GTPase activity; P:endoplasmic reticulum-plasma membrane tethering; F:GTPase activator activity; F:calcium ion binding; F:protein binding; F:phospholipid binding; F:calcium-dependent phospholipid binding; F:lipid binding; F:phosphatidyle…			IPR000008 (SMART); IPR035892 (G3DSA:2.60.40.GENE3D); IPR000008 (PFAM); mobidb-lite (MOBIDB_LITE); mobidb-lite (MOBIDB_LITE); mobidb-lite (MOBIDB_LITE); PTHR47261 (PANTHER); NON_CYTOPLASMIC_DOMAIN (PHOBIUS); TRANSMEMBRANE (PHOBIUS); TRANSMEMBRANE (PHOBIUS); CYTOPLASMIC_DOMAIN (PHOBIUS); NON_CYTOPLASMIC_DOMAIN (PHOBIUS); IPR000008 (PROSITE_PROFILES); cd00030 (CDD); SSF49562 (SUPERFAMILY); TMhelix (…	no GO terms	no GO terms
TRINITY_DN82327_c0_g2_i5	RecName: Full=Inosine-5'-monophosphate dehydrogenase; Short=IMP dehydrogenase; Short=IMPD; Short=IMPDH	78	20	2.06331e-33	63.33	7	P:GO:0006177; P:GO:0045454; P:GO:0055114; F:GO:0000166; F:GO:0003938; F:GO:0046872; C:GO:0009570	P:GMP biosynthetic process; P:cell redox homeostasis; P:oxidation-reduction process; F:nucleotide binding; F:IMP dehydrogenase activity; F:metal ion binding; C:chloroplast stroma	EC:1.1.1.205	IMP dehydrogenase	IPR000644 (SMART); IPR000644 (PFAM); G3DSA:3.10.580.10 (GENE3D); PTHR48108 (PANTHER); PTHR48108:SF8 (PANTHER); IPR000644 (PROSITE_PROFILES); cd17789 (CDD); SSF54631 (SUPERFAMILY)	no GO terms	no GO terms
TRINITY_DN91356_c0_g2_i17	RecName: Full=Guanylate kinase; AltName: Full=GMP kinase	204	20	4.35426e-99	68.24	21	P:GO:0006183; P:GO:0006185; P:GO:0006805; P:GO:0015949; P:GO:0019673; P:GO:0034436; P:GO:0046034; P:GO:0046037; P:GO:0046054; P:GO:0046060; P:GO:0046711; P:GO:0046939; P:GO:0046940; P:GO:0048229; P:GO:0048638; F:GO:0004385; F:GO:0005515; F:GO:0005524; C:GO:0001917; C:GO:0005634; C:GO:0005829	P:GTP biosynthetic process; P:dGDP biosynthetic process; P:xenobiotic metabolic process; P:nucleobase-containing small molecule interconversion; P:GDP-mannose metabolic process; P:glycoprotein transport; P:ATP metabolic process; P:GMP metabolic process; P:dGMP metabolic process; P:dATP metabolic process; P:GDP biosynthetic process; P:nucleotide phosphorylation; P:nucleoside monophosphate phosphor…	EC:2.7.4.4; EC:2.7.4.8	Nucleoside-phosphate kinase; Guanylate kinase	IPR008145 (SMART); G3DSA:3.40.50.300 (GENE3D); IPR008145 (PFAM); PTHR23117 (PANTHER); PTHR23117:SF21 (PANTHER); IPR020590 (PROSITE_PATTERNS); IPR008144 (PROSITE_PROFILES); cd00071 (CDD); IPR027417 (SUPERFAMILY); IPR011043 (SUPERFAMILY)	no GO terms	no GO terms
TRINITY_DN15403_c0_g2_i1	RecName: Full=Ferrochelatase; AltName: Full=Heme synthase; AltName: Full=Protoheme ferro-lyase	91	19	7.68747e-30	75.29	6	P:GO:0006783; P:GO:0006979; F:GO:0004325; C:GO:0005739; C:GO:0009535; C:GO:0031969	P:heme biosynthetic process; P:response to oxidative stress; F:ferrochelatase activity; C:mitochondrion; C:chloroplast thylakoid membrane; C:chloroplast membrane	EC:4.99.1.1	Protoporphyrin ferrochelatase	IPR001015 (PANTHER); PTHR11108:SF4 (PANTHER); NON_CYTOPLASMIC_DOMAIN (PHOBIUS); CYTOPLASMIC_DOMAIN (PHOBIUS); TRANSMEMBRANE (PHOBIUS); SSF53800 (SUPERFAMILY); TMhelix (TMHMM)	P:GO:0006783; F:GO:0004325	P:heme biosynthetic process; F:ferrochelatase activity
TRINITY_DN79018_c0_g3_i4	RecName: Full=Inositol-1-monophosphatase; Short=I-1-Pase; Short=IMPase; Short=Inositol-1-phosphatase	79	20	4.49102e-37	68.99	21	P:GO:0006021; P:GO:0006661; P:GO:0007165; P:GO:0010226; P:GO:0019853; P:GO:0046854; P:GO:0046855; F:GO:0000287; F:GO:0008934; F:GO:0010347; F:GO:0030145; F:GO:0031403; F:GO:0042132; F:GO:0042803; F:GO:0047954; F:GO:0052832; F:GO:0052833; C:GO:0005829; C:GO:0005886; C:GO:0030424; C:GO:0043025	P:inositol biosynthetic process; P:phosphatidylinositol biosynthetic process; P:signal transduction; P:response to lithium ion; P:L-ascorbic acid biosynthetic process; P:phosphatidylinositol phosphorylation; P:inositol phosphate dephosphorylation; F:magnesium ion binding; F:inositol monophosphate 1-phosphatase activity; F:L-galactose-1-phosphate phosphatase activity; F:manganese ion binding; F:li…	EC:3.1.3.19; EC:3.1.3.25; EC:3.1.3.23; EC:3.1.3.11	Glycerol-2-phosphatase; Inositol-phosphate phosphatase; Sugar-phosphatase; Fructose-bisphosphatase	G3DSA:3.40.190.80 (GENE3D); IPR000760 (PFAM); PTHR20854:SF45 (PANTHER); PTHR20854 (PANTHER); IPR020550 (PROSITE_PATTERNS); SSF56655 (SUPERFAMILY)	P:GO:0046854; P:GO:0046855	P:phosphatidylinositol phosphorylation; P:inositol phosphate dephosphorylation
TRINITY_DN85129_c0_g1_i1	RecName: Full=Probable exo-1,4-beta-xylosidase xlnD; AltName: Full=1,4-beta-D-xylan xylohydrolase xlnD; AltName: Full=Beta-xylosidase A; AltName: Full=Beta-xylosidase xlnD; AltName: Full=Xylobiase xlnD; Flags: Precursor	454	20	0	57.15	14	P:GO:0006826; P:GO:0006879; P:GO:0009627; P:GO:0010214; P:GO:0031222; P:GO:0045493; F:GO:0008199; F:GO:0009044; F:GO:0046556; C:GO:0005774; C:GO:0009505; C:GO:0009506; C:GO:0009507; C:GO:0048046	P:iron ion transport; P:cellular iron ion homeostasis; P:systemic acquired resistance; P:seed coat development; P:arabinan catabolic process; P:xylan catabolic process; F:ferric iron binding; F:xylan 1,4-beta-xylosidase activity; F:alpha-L-arabinofuranosidase activity; C:vacuolar membrane; C:plant-type cell wall; C:plasmodesma; C:chloroplast; C:apoplast	EC:3.2.1.55; EC:3.2.1.37	Non-reducing end alpha-L-arabinofuranosidase; Xylan 1,4-beta-xylosidase	IPR026891 (SMART); IPR002772 (PFAM); IPR036881 (G3DSA:3.40.50.GENE3D); IPR036962 (G3DSA:3.20.20.GENE3D); IPR026891 (PFAM); IPR013783 (G3DSA:2.60.40.GENE3D); PTHR42721 (PANTHER); PTHR42721:SF1 (PANTHER); IPR017853 (SUPERFAMILY); IPR036881 (SUPERFAMILY)	P:GO:0005975; F:GO:0004553	P:carbohydrate metabolic process; F:hydrolase activity, hydrolyzing O-glycosyl compounds
TRINITY_DN71391_c0_g2_i3	RecName: Full=Protein p34	223	16	1.50521e-124	65.85	19	P:GO:0006826; P:GO:0009787; P:GO:0009845; P:GO:0010042; P:GO:0030026; P:GO:0046688; P:GO:0048316; P:GO:0071421; P:GO:0097577; P:GO:1902600; P:GO:2000022; P:GO:2000031; F:GO:0010486; C:GO:0000139; C:GO:0005886; C:GO:0009705; C:GO:0016021; C:GO:0031902; C:GO:0035618	P:iron ion transport; P:regulation of abscisic acid-activated signaling pathway; P:seed germination; P:response to manganese ion; P:cellular manganese ion homeostasis; P:response to copper ion; P:seed development; P:manganese ion transmembrane transport; P:sequestering of iron ion; P:proton transmembrane transport; P:regulation of jasmonic acid mediated signaling pathway; P:regulation of salicyli…			IPR027470 (PFAM); IPR036837 (G3DSA:3.30.70.GENE3D); IPR002524 (PFAM); IPR027469 (G3DSA:1.20.1510.GENE3D); PTHR43840:SF16 (PANTHER); PTHR43840 (PANTHER); SIGNAL_PEPTIDE_H_REGION (PHOBIUS); SIGNAL_PEPTIDE (PHOBIUS); TRANSMEMBRANE (PHOBIUS); NON_CYTOPLASMIC_DOMAIN (PHOBIUS); CYTOPLASMIC_DOMAIN (PHOBIUS); SIGNAL_PEPTIDE_N_REGION (PHOBIUS); SIGNAL_PEPTIDE_C_REGION (PHOBIUS); NON_CYTOPLASMIC_DOMAIN (PH…	P:GO:0006812; P:GO:0055085; F:GO:0008324; C:GO:0016021	P:cation transport; P:transmembrane transport; F:cation transmembrane transporter activity; C:integral component of membrane
TRINITY_DN80766_c0_g1_i4	RecName: Full=Senescence-associated protein AAF, chlorolplastic; AltName: Full=Protein ARABIDOPSIS A-FIFTEEN; Flags: Precursor	459	3	1.65773e-139	77.14	5	P:GO:0010150; P:GO:0010228; P:GO:0034599; P:GO:0072593; C:GO:0009507	P:leaf senescence; P:vegetative to reproductive phase transition of meristem; P:cellular response to oxidative stress; P:reactive oxygen species metabolic process; C:chloroplast			PTHR36725 (PANTHER)	no GO terms	no GO terms
TRINITY_DN90794_c3_g1_i4	RecName: Full=Bifunctional polymyxin resistance protein ArnA; Includes: RecName: Full=UDP-4-amino-4-deoxy-L-arabinose formyltransferase; AltName: Full=ArnAFT; AltName: Full=UDP-L-Ara4N formyltransferase; Includes: RecName: Full=UDP-glucuronic acid oxidase, UDP-4-keto-hexauronic acid decarboxylating; AltName: Full=ArnADH; AltName: Full=UDP-GlcUA decarboxylase; AltName: Full=UDP-glucuronic acid deh…	328	20	0	60.87	8	P:GO:0009103; P:GO:0009245; P:GO:0046677; P:GO:0055114; P:GO:0071555; F:GO:0099618; F:GO:0099619; C:GO:0005829	P:lipopolysaccharide biosynthetic process; P:lipid A biosynthetic process; P:response to antibiotic; P:oxidation-reduction process; P:cell wall organization; F:UDP-glucuronic acid dehydrogenase activity; F:UDP-4-amino-4-deoxy-L-arabinose formyltransferase activity; C:cytosol	EC:1.1.1.305; EC:2.1.2.13	UDP-glucuronic acid oxidase (UDP-4-keto-hexauronic acid decarboxylating); UDP-4-amino-4-deoxy-L-arabinose formyltransferase	G3DSA:3.40.50.720 (GENE3D); IPR001509 (PFAM); PTHR43245:SF30 (PANTHER); PTHR43245 (PANTHER); NON_CYTOPLASMIC_DOMAIN (PHOBIUS); TRANSMEMBRANE (PHOBIUS); TRANSMEMBRANE (PHOBIUS); NON_CYTOPLASMIC_DOMAIN (PHOBIUS); CYTOPLASMIC_DOMAIN (PHOBIUS); IPR036291 (SUPERFAMILY)	F:GO:0003824	F:catalytic activity
TRINITY_DN83077_c0_g1_i4	RecName: Full=Protein argonaute-3; Short=Argonaute3; AltName: Full=Argonaute RISC catalytic component 3; AltName: Full=Eukaryotic translation initiation factor 2C 3; Short=eIF-2C 3; Short=eIF2C 3	565	20	0	64.77	62	P:GO:0007140; P:GO:0007143; P:GO:0009561; P:GO:0009733; P:GO:0009791; P:GO:0009814; P:GO:0009850; P:GO:0009934; P:GO:0010501; P:GO:0010586; P:GO:0031054; P:GO:0033169; P:GO:0035019; P:GO:0035087; P:GO:0035279; P:GO:0035280; P:GO:0042985; P:GO:0045652; P:GO:0045766; P:GO:0045944; P:GO:0045947; P:GO:0048366; P:GO:0055046; P:GO:0060145; P:GO:0060213; P:GO:0061866; P:GO:0072091; P:GO:0090502; P:GO:00…	P:male meiotic nuclear division; P:female meiotic nuclear division; P:megagametogenesis; P:response to auxin; P:post-embryonic development; P:defense response, incompatible interaction; P:auxin metabolic process; P:regulation of meristem structural organization; P:RNA secondary structure unwinding; P:miRNA metabolic process; P:pre-miRNA processing; P:histone H3-K9 demethylation; P:somatic stem ce…	EC:3.1.30; EC:3.1.26	Acting on ester bonds; Acting on ester bonds	IPR003100 (SMART); IPR014811 (SMART); IPR032472 (PFAM); IPR014811 (PFAM); IPR003100 (PFAM); IPR032473 (PFAM); G3DSA:3.40.50.2300 (GENE3D); IPR032474 (PFAM); G3DSA:2.170.260.10 (GENE3D); mobidb-lite (MOBIDB_LITE); mobidb-lite (MOBIDB_LITE); PTHR22891 (PANTHER); PTHR22891:SF139 (PANTHER); IPR003100 (PROSITE_PROFILES); cd02846 (CDD); SignalP-TM (SIGNALP_GRAM_POSITIVE); IPR036085 (SUPERFAMILY)	F:GO:0005515	F:protein binding
TRINITY_DN89842_c2_g2_i1	RecName: Full=Probable alpha/beta-glucosidase agdC; Flags: Precursor	879	20	0	59.64	37	P:GO:0000023; P:GO:0002026; P:GO:0002086; P:GO:0003007; P:GO:0005980; P:GO:0005983; P:GO:0005985; P:GO:0007040; P:GO:0007626; P:GO:0009888; P:GO:0010411; P:GO:0043181; P:GO:0043312; P:GO:0045493; P:GO:0046686; P:GO:0046716; P:GO:0050884; P:GO:0050885; P:GO:0060048; P:GO:0071555; F:GO:0008422; F:GO:0009044; F:GO:0016160; F:GO:0030246; F:GO:0032450; F:GO:0046556; F:GO:0061634; F:GO:0080176; F:GO:01…	P:maltose metabolic process; P:regulation of the force of heart contraction; P:diaphragm contraction; P:heart morphogenesis; P:glycogen catabolic process; P:starch catabolic process; P:sucrose metabolic process; P:lysosome organization; P:locomotory behavior; P:tissue development; P:xyloglucan metabolic process; P:vacuolar sequestering; P:neutrophil degranulation; P:xylan catabolic process; P:res…	EC:3.2.1.20; EC:3.2.1.21; EC:3.2.1.177; EC:3.2.1.55; EC:3.2.1.37	Alpha-glucosidase; Beta-glucosidase; Alpha-D-xyloside xylohydrolase; Non-reducing end alpha-L-arabinofuranosidase; Xylan 1,4-beta-xylosidase	G3DSA:2.60.40.1760 (GENE3D); IPR025887 (PFAM); G3DSA:3.20.20.80 (GENE3D); IPR013780 (G3DSA:2.60.40.GENE3D); IPR013780 (G3DSA:2.60.40.GENE3D); IPR000322 (PFAM); IPR031727 (PFAM); PTHR22762:SF154 (PANTHER); PTHR22762 (PANTHER); PTHR22762 (PANTHER); IPR030458 (PROSITE_PATTERNS); IPR030459 (PROSITE_PATTERNS); SIGNAL_PEPTIDE_C_REGION (PHOBIUS); SIGNAL_PEPTIDE (PHOBIUS); SIGNAL_PEPTIDE_N_REGION (PHOBIU…	P:GO:0005975; F:GO:0003824; F:GO:0004553; F:GO:0030246	P:carbohydrate metabolic process; F:catalytic activity; F:hydrolase activity, hydrolyzing O-glycosyl compounds; F:carbohydrate binding
TRINITY_DN92396_c2_g2_i1	RecName: Full=Neutral alpha-glucosidase AB; AltName: Full=Alpha-glucosidase 2; AltName: Full=Glucosidase II subunit alpha; Flags: Precursor	991	20	2.36613e-138	50.99	33	P:GO:0000023; P:GO:0002026; P:GO:0002086; P:GO:0003007; P:GO:0005980; P:GO:0005985; P:GO:0006006; P:GO:0006457; P:GO:0006491; P:GO:0007040; P:GO:0007626; P:GO:0009826; P:GO:0009888; P:GO:0030244; P:GO:0031288; P:GO:0042742; P:GO:0043181; P:GO:0043687; P:GO:0046686; P:GO:0046716; P:GO:0050884; P:GO:0050885; P:GO:0060048; F:GO:0005515; F:GO:0030246; F:GO:0032450; F:GO:0033919; C:GO:0005764; C:GO:00…	P:maltose metabolic process; P:regulation of the force of heart contraction; P:diaphragm contraction; P:heart morphogenesis; P:glycogen catabolic process; P:sucrose metabolic process; P:glucose metabolic process; P:protein folding; P:N-glycan processing; P:lysosome organization; P:locomotory behavior; P:unidimensional cell growth; P:tissue development; P:cellulose biosynthetic process; P:sorocarp…	EC:3.2.1.20; EC:3.2.1.84	Alpha-glucosidase; Glucan 1,3-alpha-glucosidase	Coil (COILS); IPR033403 (PFAM); IPR025887 (PFAM); IPR000322 (PFAM); IPR013780 (G3DSA:2.60.40.GENE3D); G3DSA:3.20.20.80 (GENE3D); G3DSA:2.60.40.1760 (GENE3D); PTHR22762:SF149 (PANTHER); PTHR22762 (PANTHER); IPR030458 (PROSITE_PATTERNS); cd14752 (CDD); cd06604 (CDD); IPR017853 (SUPERFAMILY); IPR011013 (SUPERFAMILY)	P:GO:0005975; F:GO:0003824; F:GO:0004553; F:GO:0030246	P:carbohydrate metabolic process; F:catalytic activity; F:hydrolase activity, hydrolyzing O-glycosyl compounds; F:carbohydrate binding
TRINITY_DN91187_c0_g1_i12	RecName: Full=Leucine-rich repeat-containing protein 7; AltName: Full=Densin-180; Short=Densin; AltName: Full=Protein LAP1	602	20	1.27422e-45	51.17	76	P:GO:0000165; P:GO:0000902; P:GO:0001708; P:GO:0001737; P:GO:0007318; P:GO:0007391; P:GO:0007464; P:GO:0007613; P:GO:0009416; P:GO:0009733; P:GO:0009816; P:GO:0009817; P:GO:0009862; P:GO:0010976; P:GO:0016332; P:GO:0016336; P:GO:0019677; P:GO:0019991; P:GO:0030100; P:GO:0030714; P:GO:0030833; P:GO:0031152; P:GO:0031154; P:GO:0031589; P:GO:0042048; P:GO:0043068; P:GO:0043113; P:GO:0043312; P:GO:00…	P:MAPK cascade; P:cell morphogenesis; P:cell fate specification; P:establishment of imaginal disc-derived wing hair orientation; P:pole plasm protein localization; P:dorsal closure; P:R3/R4 cell fate commitment; P:memory; P:response to light stimulus; P:response to auxin; P:defense response to bacterium, incompatible interaction; P:defense response to fungus, incompatible interaction; P:systemic …	EC:3.2.2.6	ADP-ribosyl cyclase/cyclic ADP-ribose hydrolase	IPR003591 (SMART); IPR032675 (G3DSA:3.80.10.GENE3D); IPR032675 (G3DSA:3.80.10.GENE3D); IPR032675 (G3DSA:3.80.10.GENE3D); PTHR47186 (PANTHER); IPR001611 (PROSITE_PROFILES); IPR001611 (PROSITE_PROFILES); IPR001611 (PROSITE_PROFILES); IPR001611 (PROSITE_PROFILES); IPR001611 (PROSITE_PROFILES); IPR001611 (PROSITE_PROFILES); IPR001611 (PROSITE_PROFILES); IPR001611 (PROSITE_PROFILES); SSF52058 (SUPERFA…	F:GO:0005515	F:protein binding
TRINITY_DN91219_c2_g2_i15	RecName: Full=Squamosa promoter-binding-like protein 10	640	20	1.04617e-173	68.29	21	P:GO:0009554; P:GO:0009556; P:GO:0009911; P:GO:0010228; P:GO:0010229; P:GO:0010321; P:GO:0010358; P:GO:0030154; P:GO:0042742; P:GO:0045893; P:GO:0048510; P:GO:0048653; P:GO:0090356; F:GO:0000976; F:GO:0003700; F:GO:0005515; F:GO:0046872; C:GO:0005634; C:GO:0005737; C:GO:0005886; C:GO:0042025	P:megasporogenesis; P:microsporogenesis; P:positive regulation of flower development; P:vegetative to reproductive phase transition of meristem; P:inflorescence development; P:regulation of vegetative phase change; P:leaf shaping; P:cell differentiation; P:defense response to bacterium; P:positive regulation of transcription, DNA-templated; P:regulation of timing of transition from vegetative to …			IPR004333 (PFAM); IPR036893 (G3DSA:4.10.1100.GENE3D); mobidb-lite (MOBIDB_LITE); mobidb-lite (MOBIDB_LITE); mobidb-lite (MOBIDB_LITE); mobidb-lite (MOBIDB_LITE); PTHR31251 (PANTHER); PTHR31251:SF110 (PANTHER); IPR004333 (PROSITE_PROFILES); IPR036893 (SUPERFAMILY)	F:GO:0003677; C:GO:0005634	F:DNA binding; C:nucleus
TRINITY_DN11688_c0_g1_i1	RecName: Full=Arginine-hydroxylase NDUFAF5, mitochondrial; AltName: Full=NADH dehydrogenase [ubiquinone] 1 alpha subcomplex assembly factor 5; AltName: Full=Putative methyltransferase NDUFAF5; Flags: Precursor	143	8	2.9776e-23	50.48	5	P:GO:0032259; P:GO:0055088; F:GO:0003729; F:GO:0008757; C:GO:0005737	P:methylation; P:lipid homeostasis; F:mRNA binding; F:S-adenosylmethionine-dependent methyltransferase activity; C:cytoplasm			IPR013216 (PFAM); G3DSA:3.40.50.150 (GENE3D); PTHR45180 (PANTHER); cd02440 (CDD); IPR029063 (SUPERFAMILY)	F:GO:0008168	F:methyltransferase activity
TRINITY_DN90027_c1_g1_i3	RecName: Full=Abscisic acid 8'-hydroxylase 1; Short=ABA 8'-hydroxylase 1; AltName: Full=Cytochrome P450 707A5; AltName: Full=OsABA8ox1	489	20	0	69.91	26	P:GO:0001578; P:GO:0009414; P:GO:0009647; P:GO:0009686; P:GO:0009733; P:GO:0009737; P:GO:0009835; P:GO:0009856; P:GO:0009911; P:GO:0010114; P:GO:0010224; P:GO:0010268; P:GO:0010584; P:GO:0016125; P:GO:0016132; P:GO:0019742; P:GO:0046345; P:GO:0048657; P:GO:0048838; P:GO:0055114; F:GO:0005506; F:GO:0010295; F:GO:0020037; F:GO:0051777; C:GO:0005789; C:GO:0016021	P:microtubule bundle formation; P:response to water deprivation; P:skotomorphogenesis; P:gibberellin biosynthetic process; P:response to auxin; P:response to abscisic acid; P:fruit ripening; P:pollination; P:positive regulation of flower development; P:response to red light; P:response to UV-B; P:brassinosteroid homeostasis; P:pollen exine formation; P:sterol metabolic process; P:brassinosteroid …	EC:1.14.14.137; EC:1.14.13	(+)-abscisic acid 8'-hydroxylase; Acting on paired donors, with incorporation or reduction of molecular oxygen. The oxygen incorporated need not be derived from O(2)	IPR001128 (PRINTS); IPR002401 (PRINTS); IPR001128 (PFAM); IPR036396 (G3DSA:1.10.630.GENE3D); PTHR24286:SF249 (PANTHER); PTHR24286 (PANTHER); IPR017972 (PROSITE_PATTERNS); NON_CYTOPLASMIC_DOMAIN (PHOBIUS); TRANSMEMBRANE (PHOBIUS); CYTOPLASMIC_DOMAIN (PHOBIUS); IPR036396 (SUPERFAMILY); TMhelix (TMHMM)	P:GO:0055114; F:GO:0005506; F:GO:0016705; F:GO:0020037	P:oxidation-reduction process; F:iron ion binding; F:oxidoreductase activity, acting on paired donors, with incorporation or reduction of molecular oxygen; F:heme binding
TRINITY_DN90040_c3_g2_i5	RecName: Full=Probable protein phosphatase 2C 33; Short=AtPP2C33; AltName: Full=AtPPC6;1	198	20	2.45887e-68	72.71	11	P:GO:0000226; P:GO:0006470; P:GO:0009819; P:GO:0045926; P:GO:1904526; F:GO:0004722; F:GO:0005515; F:GO:0046872; C:GO:0005634; C:GO:0005829; C:GO:0005886	P:microtubule cytoskeleton organization; P:protein dephosphorylation; P:drought recovery; P:negative regulation of growth; P:regulation of microtubule binding; F:protein serine/threonine phosphatase activity; F:protein binding; F:metal ion binding; C:nucleus; C:cytosol; C:plasma membrane	EC:3.1.3.16	Protein-serine/threonine phosphatase	IPR036457 (G3DSA:3.60.40.GENE3D); IPR001932 (PFAM); mobidb-lite (MOBIDB_LITE); mobidb-lite (MOBIDB_LITE); PTHR47992 (PANTHER); PTHR47992:SF30 (PANTHER); IPR001932 (PROSITE_PROFILES); IPR001932 (CDD); IPR036457 (SUPERFAMILY)	F:GO:0016791	F:phosphatase activity
TRINITY_DN87442_c0_g1_i2	RecName: Full=U5 small nuclear ribonucleoprotein 40 kDa protein; Short=U5 snRNP 40 kDa protein; AltName: Full=WD repeat-containing protein 57	520	20	1.80875e-44	50.44	8	P:GO:0000281; P:GO:0018107; P:GO:0031037; P:GO:0046777; F:GO:0005524; F:GO:0016905; F:GO:0045159; C:GO:0005826	P:mitotic cytokinesis; P:peptidyl-threonine phosphorylation; P:myosin II filament disassembly; P:protein autophosphorylation; F:ATP binding; F:myosin heavy chain kinase activity; F:myosin II binding; C:actomyosin contractile ring	EC:2.7.11; EC:2.7.11.17; EC:2.7.11.7	Transferring phosphorus-containing groups; Calcium/calmodulin-dependent protein kinase; [Myosin heavy-chain] kinase	IPR001680 (SMART); IPR001680 (PFAM); PTHR35549:SF2 (PANTHER); PTHR35549 (PANTHER); IPR001680 (PROSITE_PROFILES); IPR017986 (PROSITE_PROFILES); IPR036322 (SUPERFAMILY)	F:GO:0005515	F:protein binding
TRINITY_DN89603_c1_g2_i9	RecName: Full=Molybdenum cofactor sulfurase; Short=MCS; Short=MOS; Short=MoCo sulfurase; AltName: Full=Molybdenum cofactor sulfurtransferase	188	20	2.20346e-21	49.5	30	P:GO:0006777; P:GO:0006805; P:GO:0009407; P:GO:0009408; P:GO:0009409; P:GO:0009651; P:GO:0009688; P:GO:0009734; P:GO:0010118; P:GO:0010182; P:GO:0018315; P:GO:0032324; P:GO:0042126; P:GO:0042742; P:GO:0045037; P:GO:0051410; P:GO:0055114; F:GO:0005515; F:GO:0008265; F:GO:0008940; F:GO:0009000; F:GO:0030151; F:GO:0030170; F:GO:0043546; F:GO:0051536; F:GO:0102867; C:GO:0005741; C:GO:0005777; C:GO:00…	P:Mo-molybdopterin cofactor biosynthetic process; P:xenobiotic metabolic process; P:toxin catabolic process; P:response to heat; P:response to cold; P:response to salt stress; P:abscisic acid biosynthetic process; P:auxin-activated signaling pathway; P:stomatal movement; P:sugar mediated signaling pathway; P:molybdenum incorporation into molybdenum-molybdopterin complex; P:molybdopterin cofactor …	EC:1.7.99.4; EC:4.4.1.16; EC:2.8.1.9	Nitrate reductase; Selenocysteine lyase; Molybdenum cofactor sulfurtransferase	IPR005302 (PFAM); IPR005303 (PFAM); PTHR14237 (PANTHER); PTHR14237:SF69 (PANTHER); IPR005302 (PROSITE_PROFILES); SSF141673 (SUPERFAMILY); IPR011037 (SUPERFAMILY)	F:GO:0003824; F:GO:0030151; F:GO:0030170	F:catalytic activity; F:molybdenum ion binding; F:pyridoxal phosphate binding
TRINITY_DN91021_c2_g1_i7	RecName: Full=RNA demethylase ALKBH10B; AltName: Full=Alkylated DNA repair protein alkB homolog 10B; AltName: Full=Alpha-ketoglutarate-dependent dioxygenase alkB homolog 10B	413	2	6.77067e-51	61.23	12	P:GO:0006402; P:GO:0010228; P:GO:0016032; P:GO:0035513; P:GO:0080167; F:GO:0003729; F:GO:0005515; F:GO:0046872; F:GO:0051213; F:GO:1990931; C:GO:0000932; C:GO:0009506	P:mRNA catabolic process; P:vegetative to reproductive phase transition of meristem; P:viral process; P:oxidative RNA demethylation; P:response to karrikin; F:mRNA binding; F:protein binding; F:metal ion binding; F:dioxygenase activity; F:RNA N6-methyladenosine dioxygenase activity; C:P-body; C:plasmodesma			IPR037151 (G3DSA:2.60.120.GENE3D); mobidb-lite (MOBIDB_LITE); mobidb-lite (MOBIDB_LITE); mobidb-lite (MOBIDB_LITE); mobidb-lite (MOBIDB_LITE); mobidb-lite (MOBIDB_LITE); PTHR31447 (PANTHER); PTHR31447:SF0 (PANTHER); SSF51197 (SUPERFAMILY)	no GO terms	no GO terms
TRINITY_DN91021_c2_g1_i3	RecName: Full=RNA demethylase ALKBH10B; AltName: Full=Alkylated DNA repair protein alkB homolog 10B; AltName: Full=Alpha-ketoglutarate-dependent dioxygenase alkB homolog 10B	308	2	1.90478e-21	66.79	12	P:GO:0006402; P:GO:0010228; P:GO:0016032; P:GO:0035513; P:GO:0080167; F:GO:0003729; F:GO:0005515; F:GO:0046872; F:GO:0051213; F:GO:1990931; C:GO:0000932; C:GO:0009506	P:mRNA catabolic process; P:vegetative to reproductive phase transition of meristem; P:viral process; P:oxidative RNA demethylation; P:response to karrikin; F:mRNA binding; F:protein binding; F:metal ion binding; F:dioxygenase activity; F:RNA N6-methyladenosine dioxygenase activity; C:P-body; C:plasmodesma			IPR037151 (G3DSA:2.60.120.GENE3D); mobidb-lite (MOBIDB_LITE); mobidb-lite (MOBIDB_LITE); mobidb-lite (MOBIDB_LITE); mobidb-lite (MOBIDB_LITE); mobidb-lite (MOBIDB_LITE); PTHR31447 (PANTHER); PTHR31447:SF0 (PANTHER); SSF51197 (SUPERFAMILY)	no GO terms	no GO terms
TRINITY_DN86737_c0_g1_i1	RecName: Full=THO complex subunit 1; Short=AtTHO1; AltName: Full=HPR1 homolog; Short=AtHPR1	294	4	1.21989e-153	57.88	18	P:GO:0006406; P:GO:0008380; P:GO:0009873; P:GO:0010267; P:GO:0031124; P:GO:0031297; P:GO:0032786; P:GO:0042981; P:GO:0046784; P:GO:0048297; P:GO:0050832; P:GO:2000002; F:GO:0003723; F:GO:0005515; C:GO:0000445; C:GO:0000784; C:GO:0005737; C:GO:0016607	P:mRNA export from nucleus; P:RNA splicing; P:ethylene-activated signaling pathway; P:production of ta-siRNAs involved in RNA interference; P:mRNA 3'-end processing; P:replication fork processing; P:positive regulation of DNA-templated transcription, elongation; P:regulation of apoptotic process; P:viral mRNA export from host cell nucleus; P:negative regulation of isotype switching to IgA isotype…			Coil (COILS); Coil (COILS); IPR021861 (PFAM); IPR021861 (PANTHER); PTHR13265:SF0 (PANTHER)	no GO terms	no GO terms
TRINITY_DN91639_c2_g5_i7	RecName: Full=U5 small nuclear ribonucleoprotein 40 kDa protein; Short=U5 snRNP 40 kDa protein; AltName: Full=WD repeat-containing protein 57	936	20	0	52.19	91	P:GO:0000398; P:GO:0001654; P:GO:0002063; P:GO:0006281; P:GO:0006338; P:GO:0006919; P:GO:0007029; P:GO:0007482; P:GO:0007507; P:GO:0007595; P:GO:0009585; P:GO:0009637; P:GO:0009641; P:GO:0009647; P:GO:0009649; P:GO:0009658; P:GO:0009908; P:GO:0010100; P:GO:0010114; P:GO:0010119; P:GO:0010212; P:GO:0010218; P:GO:0010224; P:GO:0010575; P:GO:0016567; P:GO:0018105; P:GO:0019217; P:GO:0019722; P:GO:00…	P:mRNA splicing, via spliceosome; P:eye development; P:chondrocyte development; P:DNA repair; P:chromatin remodeling; P:activation of cysteine-type endopeptidase activity involved in apoptotic process; P:endoplasmic reticulum organization; P:haltere development; P:heart development; P:lactation; P:red, far-red light phototransduction; P:response to blue light; P:shade avoidance; P:skotomorphogene…	EC:2.7.11; EC:2.1.1.43; EC:2.3.1.48	Transferring phosphorus-containing groups; Transferring one-carbon groups; Histone acetyltransferase	Coil (COILS); IPR020472 (PRINTS); IPR001680 (SMART); IPR015943 (G3DSA:2.130.10.GENE3D); IPR001680 (PFAM); PTHR44218 (PANTHER); PTHR44218 (PANTHER); PTHR44218:SF3 (PANTHER); IPR019775 (PROSITE_PATTERNS); IPR019775 (PROSITE_PATTERNS); NON_CYTOPLASMIC_DOMAIN (PHOBIUS); CYTOPLASMIC_DOMAIN (PHOBIUS); TRANSMEMBRANE (PHOBIUS); IPR001680 (PROSITE_PROFILES); IPR001680 (PROSITE_PROFILES); IPR000719 (PROSIT…	P:GO:0006468; F:GO:0004672; F:GO:0005515; F:GO:0005524	P:protein phosphorylation; F:protein kinase activity; F:protein binding; F:ATP binding
TRINITY_DN80951_c0_g2_i4	RecName: Full=Bidirectional sugar transporter SWEET2a; Short=OsSWEET2a; Flags: Precursor	235	20	3.71024e-93	67.27	8	P:GO:0010930; P:GO:0015757; P:GO:0051260; P:GO:0060918; F:GO:0042802; F:GO:0051119; C:GO:0005789; C:GO:0005887	P:negative regulation of auxin mediated signaling pathway; P:galactose transmembrane transport; P:protein homooligomerization; P:auxin transport; F:identical protein binding; F:sugar transmembrane transporter activity; C:endoplasmic reticulum membrane; C:integral component of plasma membrane			G3DSA:1.20.1280.290 (GENE3D); G3DSA:1.20.1280.290 (GENE3D); IPR004316 (PFAM); PTHR10791 (PANTHER); PTHR10791:SF57 (PANTHER); CYTOPLASMIC_DOMAIN (PHOBIUS); NON_CYTOPLASMIC_DOMAIN (PHOBIUS); NON_CYTOPLASMIC_DOMAIN (PHOBIUS); TRANSMEMBRANE (PHOBIUS); NON_CYTOPLASMIC_DOMAIN (PHOBIUS); CYTOPLASMIC_DOMAIN (PHOBIUS); CYTOPLASMIC_DOMAIN (PHOBIUS); TRANSMEMBRANE (PHOBIUS); TRANSMEMBRANE (PHOBIUS); TRANSME…	C:GO:0016021	C:integral component of membrane
TRINITY_DN61647_c0_g2_i1	RecName: Full=Lysine-specific histone demethylase 1 homolog 2; AltName: Full=Flavin-containing amine oxidase domain-containing protein 2; AltName: Full=Protein LSD1-LIKE 2	492	20	0	58.03	82	P:GO:0000122; P:GO:0000380; P:GO:0002052; P:GO:0006342; P:GO:0006349; P:GO:0007596; P:GO:0010228; P:GO:0010569; P:GO:0010725; P:GO:0010976; P:GO:0016575; P:GO:0016579; P:GO:0021983; P:GO:0021987; P:GO:0030851; P:GO:0032091; P:GO:0033169; P:GO:0033184; P:GO:0034644; P:GO:0034720; P:GO:0035563; P:GO:0042551; P:GO:0043046; P:GO:0043392; P:GO:0043433; P:GO:0043518; P:GO:0044030; P:GO:0045648; P:GO:00…	P:negative regulation of transcription by RNA polymerase II; P:alternative mRNA splicing, via spliceosome; P:positive regulation of neuroblast proliferation; P:chromatin silencing; P:regulation of gene expression by genetic imprinting; P:blood coagulation; P:vegetative to reproductive phase transition of meristem; P:regulation of double-strand break repair via homologous recombination; P:regulati…	EC:1.5.3.17; EC:1.5.3.16; EC:1.5.3.13; EC:1.5.3.11; EC:1.14.11.65; EC:1.14.11.66; EC:1.14.11.67	Non-specific polyamine oxidase; Spermine oxidase; N(1)-acetylpolyamine oxidase; Acting on the CH-NH group of donors; [Histone H3]-dimethyl-L-lysine(9) demethylase; [Histone H3]-trimethyl-L-lysine(9) demethylase; [Histone H3]-trimethyl-L-lysine(4) demethylase	IPR001613 (PRINTS); IPR036188 (G3DSA:3.50.50.GENE3D); G3DSA:3.90.660.10 (GENE3D); IPR002937 (PFAM); PTHR10742 (PANTHER); PTHR10742:SF376 (PANTHER); IPR036188 (SUPERFAMILY); SSF54373 (SUPERFAMILY)	P:GO:0055114; F:GO:0016491	P:oxidation-reduction process; F:oxidoreductase activity
TRINITY_DN71726_c0_g2_i1	RecName: Full=WW domain-containing oxidoreductase	167	20	2.43554e-91	61.07	40	P:GO:0000122; P:GO:0001649; P:GO:0006874; P:GO:0007601; P:GO:0009644; P:GO:0010842; P:GO:0015031; P:GO:0016062; P:GO:0030178; P:GO:0042462; P:GO:0042572; P:GO:0042574; P:GO:0045494; P:GO:0045944; P:GO:0048705; P:GO:0055114; P:GO:0071560; P:GO:0072332; P:GO:0110095; P:GO:2001241; F:GO:0003713; F:GO:0004745; F:GO:0005516; F:GO:0016229; F:GO:0019899; F:GO:0033721; F:GO:0042802; F:GO:0052650; C:GO:00…	P:negative regulation of transcription by RNA polymerase II; P:osteoblast differentiation; P:cellular calcium ion homeostasis; P:visual perception; P:response to high light intensity; P:retina layer formation; P:protein transport; P:adaptation of rhodopsin mediated signaling; P:negative regulation of Wnt signaling pathway; P:eye photoreceptor cell development; P:retinol metabolic process; P:retin…	EC:1.1.1.105; EC:1.1.1.300; EC:1.2.1.5; EC:1.2.1.4; EC:1.1.1.2	All-trans-retinol dehydrogenase (NAD(+)); NADP-retinol dehydrogenase; Aldehyde dehydrogenase (NAD(P)(+)); Aldehyde dehydrogenase (NADP(+)); Alcohol dehydrogenase (NADP(+))	G3DSA:3.40.50.720 (GENE3D); PTHR24320 (PANTHER); PTHR24320:SF230 (PANTHER); IPR036291 (SUPERFAMILY)	no GO terms	no GO terms
TRINITY_DN79758_c0_g2_i1	RecName: Full=mRNA decay activator protein ZFP36; AltName: Full=Tristetraprolin; Short=TTP; AltName: Full=Zinc finger protein 36; Short=Zfp-36	308	20	1.42386e-79	61.65	85	P:GO:0000122; P:GO:0001570; P:GO:0003342; P:GO:0007507; P:GO:0009611; P:GO:0010837; P:GO:0014065; P:GO:0016246; P:GO:0021915; P:GO:0031440; P:GO:0032075; P:GO:0032680; P:GO:0032703; P:GO:0032869; P:GO:0032897; P:GO:0033077; P:GO:0035019; P:GO:0035264; P:GO:0035278; P:GO:0038066; P:GO:0039020; P:GO:0042594; P:GO:0043491; P:GO:0044344; P:GO:0045577; P:GO:0045599; P:GO:0045600; P:GO:0045616; P:GO:00…	P:negative regulation of transcription by RNA polymerase II; P:vasculogenesis; P:proepicardium development; P:heart development; P:response to wounding; P:regulation of keratinocyte proliferation; P:phosphatidylinositol 3-kinase signaling; P:RNA interference; P:neural tube development; P:regulation of mRNA 3'-end processing; P:positive regulation of nuclease activity; P:regulation of tumor necros…			Coil (COILS); IPR000571 (SMART); G3DSA:4.10.1000.10 (GENE3D); IPR000571 (PFAM); PTHR12547 (PANTHER); PTHR12547:SF141 (PANTHER); IPR000571 (PROSITE_PROFILES); IPR000571 (PROSITE_PROFILES); IPR036855 (SUPERFAMILY); IPR036855 (SUPERFAMILY)	F:GO:0046872	F:metal ion binding
TRINITY_DN87202_c1_g2_i4	RecName: Full=mRNA decay activator protein ZFP36; AltName: Full=Tristetraprolin; Short=TTP; AltName: Full=Zinc finger protein 36; Short=Zfp-36	316	20	2.09559e-83	63.52	82	P:GO:0000122; P:GO:0001570; P:GO:0003342; P:GO:0007507; P:GO:0009611; P:GO:0010837; P:GO:0014065; P:GO:0016246; P:GO:0021915; P:GO:0031440; P:GO:0032680; P:GO:0032703; P:GO:0032869; P:GO:0032897; P:GO:0033077; P:GO:0035019; P:GO:0035264; P:GO:0035278; P:GO:0038066; P:GO:0039020; P:GO:0042594; P:GO:0043491; P:GO:0044344; P:GO:0045577; P:GO:0045599; P:GO:0045600; P:GO:0045616; P:GO:0045647; P:GO:00…	P:negative regulation of transcription by RNA polymerase II; P:vasculogenesis; P:proepicardium development; P:heart development; P:response to wounding; P:regulation of keratinocyte proliferation; P:phosphatidylinositol 3-kinase signaling; P:RNA interference; P:neural tube development; P:regulation of mRNA 3'-end processing; P:regulation of tumor necrosis factor production; P:negative regulation …			Coil (COILS); IPR000571 (SMART); IPR000571 (PFAM); G3DSA:4.10.1000.10 (GENE3D); mobidb-lite (MOBIDB_LITE); mobidb-lite (MOBIDB_LITE); mobidb-lite (MOBIDB_LITE); PTHR12547:SF139 (PANTHER); PTHR12547 (PANTHER); IPR000571 (PROSITE_PROFILES); IPR000571 (PROSITE_PROFILES); IPR036855 (SUPERFAMILY); IPR036855 (SUPERFAMILY)	F:GO:0046872	F:metal ion binding
TRINITY_DN87202_c1_g2_i3	RecName: Full=mRNA decay activator protein ZFP36; AltName: Full=Tristetraprolin; Short=TTP; AltName: Full=Zinc finger protein 36; Short=Zfp-36	316	20	2.09559e-83	63.52	82	P:GO:0000122; P:GO:0001570; P:GO:0003342; P:GO:0007507; P:GO:0009611; P:GO:0010837; P:GO:0014065; P:GO:0016246; P:GO:0021915; P:GO:0031440; P:GO:0032680; P:GO:0032703; P:GO:0032869; P:GO:0032897; P:GO:0033077; P:GO:0035019; P:GO:0035264; P:GO:0035278; P:GO:0038066; P:GO:0039020; P:GO:0042594; P:GO:0043491; P:GO:0044344; P:GO:0045577; P:GO:0045599; P:GO:0045600; P:GO:0045616; P:GO:0045647; P:GO:00…	P:negative regulation of transcription by RNA polymerase II; P:vasculogenesis; P:proepicardium development; P:heart development; P:response to wounding; P:regulation of keratinocyte proliferation; P:phosphatidylinositol 3-kinase signaling; P:RNA interference; P:neural tube development; P:regulation of mRNA 3'-end processing; P:regulation of tumor necrosis factor production; P:negative regulation …			Coil (COILS); IPR000571 (SMART); IPR000571 (PFAM); G3DSA:4.10.1000.10 (GENE3D); mobidb-lite (MOBIDB_LITE); mobidb-lite (MOBIDB_LITE); mobidb-lite (MOBIDB_LITE); PTHR12547:SF139 (PANTHER); PTHR12547 (PANTHER); IPR000571 (PROSITE_PROFILES); IPR000571 (PROSITE_PROFILES); IPR036855 (SUPERFAMILY); IPR036855 (SUPERFAMILY)	F:GO:0046872	F:metal ion binding
TRINITY_DN87454_c0_g1_i4	RecName: Full=Mitochondrial proton/calcium exchanger protein; AltName: Full=Leucine zipper-EF-hand-containing transmembrane protein 1; Flags: Precursor	468	17	6.13004e-54	64.38	23	P:GO:0007269; P:GO:0032979; P:GO:0034214; P:GO:0035725; P:GO:0042407; P:GO:0051260; P:GO:0051562; P:GO:0070584; P:GO:0071456; P:GO:0071805; P:GO:0098656; P:GO:0099093; P:GO:1900069; P:GO:1902600; F:GO:0005432; F:GO:0005509; F:GO:0005515; F:GO:0015369; F:GO:0015386; F:GO:0043022; C:GO:0016021; C:GO:0098793; C:GO:0099617	P:neurotransmitter secretion; P:protein insertion into mitochondrial inner membrane from matrix; P:protein hexamerization; P:sodium ion transmembrane transport; P:cristae formation; P:protein homooligomerization; P:negative regulation of mitochondrial calcium ion concentration; P:mitochondrion morphogenesis; P:cellular response to hypoxia; P:potassium ion transmembrane transport; P:anion transmem…			Coil (COILS); Coil (COILS); Coil (COILS); G3DSA:1.10.238.10 (GENE3D); IPR011685 (PFAM); mobidb-lite (MOBIDB_LITE); PTHR14009:SF36 (PANTHER); PTHR14009 (PANTHER); IPR002048 (PROSITE_PROFILES); IPR002048 (PROSITE_PROFILES); IPR033122 (PROSITE_PROFILES); IPR011992 (SUPERFAMILY)	F:GO:0005509; F:GO:0043022	F:calcium ion binding; F:ribosome binding
TRINITY_DN75457_c0_g3_i2	RecName: Full=WRKY transcription factor WRKY51; Short=OsWRKY51	345	20	1.3212e-120	74.61	30	P:GO:0007263; P:GO:0009409; P:GO:0009414; P:GO:0009555; P:GO:0009627; P:GO:0009651; P:GO:0009682; P:GO:0009737; P:GO:0009793; P:GO:0009863; P:GO:0009938; P:GO:0010120; P:GO:0010150; P:GO:0010200; P:GO:0010508; P:GO:0019760; P:GO:0045892; P:GO:0045893; P:GO:0050832; P:GO:0070370; P:GO:2000022; F:GO:0000976; F:GO:0003700; F:GO:0005516; F:GO:0005524; F:GO:0008270; F:GO:0043531; F:GO:1990841; C:GO:00…	P:nitric oxide mediated signal transduction; P:response to cold; P:response to water deprivation; P:pollen development; P:systemic acquired resistance; P:response to salt stress; P:induced systemic resistance; P:response to abscisic acid; P:embryo development ending in seed dormancy; P:salicylic acid mediated signaling pathway; P:negative regulation of gibberellic acid mediated signaling pathway;…			IPR003657 (SMART); IPR018872 (PFAM); IPR036576 (G3DSA:2.20.25.GENE3D); IPR003657 (PFAM); mobidb-lite (MOBIDB_LITE); mobidb-lite (MOBIDB_LITE); mobidb-lite (MOBIDB_LITE); PTHR31282:SF129 (PANTHER); PTHR31282 (PANTHER); IPR003657 (PROSITE_PROFILES); IPR036576 (SUPERFAMILY)	P:GO:0006355; F:GO:0003700; F:GO:0043565	P:regulation of transcription, DNA-templated; F:DNA-binding transcription factor activity; F:sequence-specific DNA binding
TRINITY_DN63884_c0_g1_i1	RecName: Full=High affinity nitrate transporter 2.5; Short=AtNRT2:5	278	18	2.05744e-123	66.49	14	P:GO:0015707; P:GO:0042128; P:GO:0048527; P:GO:0055085; P:GO:0071249; P:GO:0080167; P:GO:1902025; F:GO:0005515; F:GO:0015112; F:GO:0015113; C:GO:0005886; C:GO:0009705; C:GO:0016021; C:GO:1990351	P:nitrite transport; P:nitrate assimilation; P:lateral root development; P:transmembrane transport; P:cellular response to nitrate; P:response to karrikin; P:nitrate import; F:protein binding; F:nitrate transmembrane transporter activity; F:nitrite transmembrane transporter activity; C:plasma membrane; C:plant-type vacuole membrane; C:integral component of membrane; C:transporter complex			G3DSA:1.20.1250.20 (GENE3D); mobidb-lite (MOBIDB_LITE); mobidb-lite (MOBIDB_LITE); mobidb-lite (MOBIDB_LITE); PTHR23515 (PANTHER); PTHR23515:SF13 (PANTHER); TRANSMEMBRANE (PHOBIUS); TRANSMEMBRANE (PHOBIUS); CYTOPLASMIC_DOMAIN (PHOBIUS); TRANSMEMBRANE (PHOBIUS); NON_CYTOPLASMIC_DOMAIN (PHOBIUS); TRANSMEMBRANE (PHOBIUS); TRANSMEMBRANE (PHOBIUS); CYTOPLASMIC_DOMAIN (PHOBIUS); CYTOPLASMIC_DOMAIN (PHO…	no GO terms	no GO terms
TRINITY_DN89848_c0_g1_i3	RecName: Full=Protein MLN51 homolog; AltName: Full=Protein CASC3 homolog; AltName: Full=Protein barentsz; Short=Btz	692	1	3.82562e-81	54.46	8	P:GO:0000184; P:GO:0006397; P:GO:0006417; P:GO:0008380; P:GO:0051028; F:GO:0003729; C:GO:0005634; C:GO:0005737	P:nuclear-transcribed mRNA catabolic process, nonsense-mediated decay; P:mRNA processing; P:regulation of translation; P:RNA splicing; P:mRNA transport; F:mRNA binding; C:nucleus; C:cytoplasm			Coil (COILS); IPR018545 (SMART); IPR018545 (PFAM); mobidb-lite (MOBIDB_LITE); mobidb-lite (MOBIDB_LITE); mobidb-lite (MOBIDB_LITE); mobidb-lite (MOBIDB_LITE); mobidb-lite (MOBIDB_LITE); mobidb-lite (MOBIDB_LITE); mobidb-lite (MOBIDB_LITE); mobidb-lite (MOBIDB_LITE); mobidb-lite (MOBIDB_LITE); mobidb-lite (MOBIDB_LITE); mobidb-lite (MOBIDB_LITE); mobidb-lite (MOBIDB_LITE); mobidb-lite (MOBIDB_LITE…	no GO terms	no GO terms
TRINITY_DN78652_c0_g2_i2	RecName: Full=Solute carrier family 23 member 2; AltName: Full=Na(+)/L-ascorbic acid transporter 2; AltName: Full=Sodium-dependent vitamin C transporter 2	363	20	0	61.9	31	P:GO:0006139; P:GO:0006979; P:GO:0007420; P:GO:0009636; P:GO:0015882; P:GO:0019852; P:GO:0030324; P:GO:0035344; P:GO:0035725; P:GO:0070837; P:GO:0070904; P:GO:0098702; P:GO:0098710; P:GO:0098721; P:GO:1901215; P:GO:1903861; F:GO:0005515; F:GO:0008520; F:GO:0015207; F:GO:0015208; F:GO:0015210; F:GO:0015229; F:GO:0033300; C:GO:0005618; C:GO:0005773; C:GO:0005783; C:GO:0005887; C:GO:0005903; C:GO:00…	P:nucleobase-containing compound metabolic process; P:response to oxidative stress; P:brain development; P:response to toxic substance; P:L-ascorbic acid transmembrane transport; P:L-ascorbic acid metabolic process; P:lung development; P:hypoxanthine transport; P:sodium ion transmembrane transport; P:dehydroascorbic acid transport; P:transepithelial L-ascorbic acid transport; P:adenine import acr…			IPR006043 (PFAM); PTHR11119 (PANTHER); IPR029943 (PTHR11119:PANTHER); NON_CYTOPLASMIC_DOMAIN (PHOBIUS); CYTOPLASMIC_DOMAIN (PHOBIUS); TRANSMEMBRANE (PHOBIUS); NON_CYTOPLASMIC_DOMAIN (PHOBIUS); NON_CYTOPLASMIC_DOMAIN (PHOBIUS); TRANSMEMBRANE (PHOBIUS); CYTOPLASMIC_DOMAIN (PHOBIUS); TRANSMEMBRANE (PHOBIUS); NON_CYTOPLASMIC_DOMAIN (PHOBIUS); TRANSMEMBRANE (PHOBIUS); CYTOPLASMIC_DOMAIN (PHOBIUS); TRA…	P:GO:0055085; F:GO:0022857; C:GO:0016020	P:transmembrane transport; F:transmembrane transporter activity; C:membrane
TRINITY_DN71376_c0_g1_i1	RecName: Full=Cyclin-dependent kinase-like 3	355	20	4.08573e-178	47.52	106	P:GO:0001503; P:GO:0002052; P:GO:0002119; P:GO:0006356; P:GO:0006359; P:GO:0006367; P:GO:0006954; P:GO:0006974; P:GO:0007258; P:GO:0007535; P:GO:0009408; P:GO:0009411; P:GO:0009643; P:GO:0009792; P:GO:0010444; P:GO:0010608; P:GO:0010628; P:GO:0010666; P:GO:0010971; P:GO:0016241; P:GO:0018105; P:GO:0018107; P:GO:0019216; P:GO:0030448; P:GO:0030517; P:GO:0030588; P:GO:0031116; P:GO:0031167; P:GO:00…	P:ossification; P:positive regulation of neuroblast proliferation; P:nematode larval development; P:regulation of transcription by RNA polymerase I; P:regulation of transcription by RNA polymerase III; P:transcription initiation from RNA polymerase II promoter; P:inflammatory response; P:cellular response to DNA damage stimulus; P:JUN phosphorylation; P:donor selection; P:response to heat; P:resp…	EC:2.7.11; EC:2.7.11.23; EC:2.7.12.1; EC:2.7.11.24; EC:2.7.11.22	Transferring phosphorus-containing groups; [RNA-polymerase]-subunit kinase; Dual-specificity kinase; Mitogen-activated protein kinase; Cyclin-dependent kinase	IPR000719 (SMART); G3DSA:1.10.510.10 (GENE3D); IPR000719 (PFAM); PTHR46699 (PANTHER); PTHR46699:SF4 (PANTHER); IPR008271 (PROSITE_PATTERNS); IPR000719 (PROSITE_PROFILES); IPR011009 (SUPERFAMILY)	P:GO:0006468; F:GO:0004672; F:GO:0005524	P:protein phosphorylation; F:protein kinase activity; F:ATP binding
TRINITY_DN73952_c0_g1_i4	RecName: Full=Matrix metalloproteinase-20; Short=MMP-20; AltName: Full=Enamel metalloproteinase; AltName: Full=Enamelysin; Flags: Precursor	57	20	1.36771e-15	68.42	88	P:GO:0001541; P:GO:0001542; P:GO:0001553; P:GO:0001666; P:GO:0001933; P:GO:0001934; P:GO:0001955; P:GO:0001957; P:GO:0002687; P:GO:0006954; P:GO:0007507; P:GO:0007566; P:GO:0007567; P:GO:0009612; P:GO:0009651; P:GO:0009753; P:GO:0010952; P:GO:0014012; P:GO:0014823; P:GO:0019087; P:GO:0022617; P:GO:0030163; P:GO:0030574; P:GO:0032526; P:GO:0034614; P:GO:0035094; P:GO:0035987; P:GO:0042493; P:GO:00…	P:ovarian follicle development; P:ovulation from ovarian follicle; P:luteinization; P:response to hypoxia; P:negative regulation of protein phosphorylation; P:positive regulation of protein phosphorylation; P:blood vessel maturation; P:intramembranous ossification; P:positive regulation of leukocyte migration; P:inflammatory response; P:heart development; P:embryo implantation; P:parturition; P:r…	EC:3.4.24.61; EC:3.4.24.23; EC:3.4.21.73; EC:3.4.24.7; EC:3.4.24.24; EC:3.4.24.69; EC:3.4.21.71; EC:3.4.24.3; EC:3.4.24.64; EC:3.4.21.34; EC:3.4.21.78; EC:3.4.24.21; EC:3.4.21.75; EC:3.4.24.22; EC:3.4.21.26; EC:3.4.21.27; EC:3.4.21.68; EC:3.4.21.69; EC:3.4.24.17; EC:3.4.24.18; EC:3.4.24.19; EC:3.4.24.70; EC:3.4.24.71; EC:3.4.24.72; EC:3.4.24.34; EC:3.4.24.35; EC:3.4.21.41; EC:3.4.24.37; EC:3.4.21…	Nardilysin; Matrilysin; U-plasminogen activator; Interstitial collagenase; Gelatinase A; Bontoxilysin; Pancreatic elastase II; Microbial collagenase; Mitochondrial processing peptidase; Plasma kallikrein; Granzyme A; Astacin; Furin; Stromelysin 2; Prolyl oligopeptidase; Coagulation factor XIa; T-plasminogen activator; Protein C (activated); Stromelysin 1; Meprin A; Procollagen C-endopeptidase; Ol…	IPR021190 (PRINTS); IPR001818 (PFAM); IPR024079 (G3DSA:3.40.390.GENE3D); PTHR10201 (PANTHER); PTHR10201:SF268 (PANTHER); SSF55486 (SUPERFAMILY)	P:GO:0006508; F:GO:0004222; F:GO:0008237; F:GO:0008270; C:GO:0031012	P:proteolysis; F:metalloendopeptidase activity; F:metallopeptidase activity; F:zinc ion binding; C:extracellular matrix
TRINITY_DN82036_c0_g1_i3	RecName: Full=Ethanolamine-phosphate cytidylyltransferase; AltName: Full=CTP:phosphoethanolamine cytidylyltransferase; AltName: Full=Phosphorylethanolamine transferase	251	20	1.77437e-109	74.64	18	P:GO:0001541; P:GO:0006646; P:GO:0006657; P:GO:0007283; P:GO:1904116; F:GO:0004105; F:GO:0004306; F:GO:0005516; F:GO:0031210; F:GO:0042803; C:GO:0005635; C:GO:0005789; C:GO:0005829; C:GO:0005886; C:GO:0019898; C:GO:0031307; C:GO:0042564; C:GO:0042587	P:ovarian follicle development; P:phosphatidylethanolamine biosynthetic process; P:CDP-choline pathway; P:spermatogenesis; P:response to vasopressin; F:choline-phosphate cytidylyltransferase activity; F:ethanolamine-phosphate cytidylyltransferase activity; F:calmodulin binding; F:phosphatidylcholine binding; F:protein homodimerization activity; C:nuclear envelope; C:endoplasmic reticulum membrane…	EC:2.7.7.15; EC:2.7.7.14	Choline-phosphate cytidylyltransferase; Ethanolamine-phosphate cytidylyltransferase	IPR004821 (TIGRFAM); IPR014729 (G3DSA:3.40.50.GENE3D); IPR004821 (PFAM); PTHR10739:SF52 (PANTHER); PTHR10739 (PANTHER); IPR041723 (CDD); SSF52374 (SUPERFAMILY)	P:GO:0009058; F:GO:0003824	P:biosynthetic process; F:catalytic activity
TRINITY_DN85690_c0_g1_i3	RecName: Full=Inactive receptor-like serine/threonine-protein kinase At2g40270; Flags: Precursor	224	20	1.67845e-89	56.41	32	P:GO:0002221; P:GO:0007166; P:GO:0009664; P:GO:0009755; P:GO:0009826; P:GO:0009934; P:GO:0010068; P:GO:0010075; P:GO:0030244; P:GO:0042335; P:GO:0045087; P:GO:0046777; P:GO:0048229; P:GO:0048354; P:GO:0048437; P:GO:0048765; P:GO:0080142; P:GO:1900426; P:GO:1905393; F:GO:0004674; F:GO:0005509; F:GO:0005524; F:GO:0030957; F:GO:0033612; F:GO:0042802; F:GO:0043621; C:GO:0005634; C:GO:0005886; C:GO:00…	P:pattern recognition receptor signaling pathway; P:cell surface receptor signaling pathway; P:plant-type cell wall organization; P:hormone-mediated signaling pathway; P:unidimensional cell growth; P:regulation of meristem structural organization; P:protoderm histogenesis; P:regulation of meristem growth; P:cellulose biosynthetic process; P:cuticle development; P:innate immune response; P:protein…	EC:2.7.11	Transferring phosphorus-containing groups	G3DSA:3.30.200.20 (GENE3D); IPR001245 (PFAM); G3DSA:1.10.510.10 (GENE3D); PIRSF000654 (PIRSF); PTHR46084:SF14 (PANTHER); PTHR46084 (PANTHER); IPR000719 (PROSITE_PROFILES); IPR011009 (SUPERFAMILY)	P:GO:0006468; F:GO:0004672; F:GO:0005524	P:protein phosphorylation; F:protein kinase activity; F:ATP binding
TRINITY_DN91202_c1_g2_i4	RecName: Full=G-type lectin S-receptor-like serine/threonine-protein kinase At1g61370; Flags: Precursor	377	20	7.86467e-145	73.22	18	P:GO:0002221; P:GO:0007178; P:GO:0009816; P:GO:0031663; P:GO:0032497; P:GO:0034613; P:GO:0046777; P:GO:0048544; P:GO:0071446; F:GO:0004675; F:GO:0005516; F:GO:0005524; F:GO:0030246; F:GO:0031625; F:GO:0038187; C:GO:0005829; C:GO:0005886; C:GO:0016021	P:pattern recognition receptor signaling pathway; P:transmembrane receptor protein serine/threonine kinase signaling pathway; P:defense response to bacterium, incompatible interaction; P:lipopolysaccharide-mediated signaling pathway; P:detection of lipopolysaccharide; P:cellular protein localization; P:protein autophosphorylation; P:recognition of pollen; P:cellular response to salicylic acid sti…	EC:2.7.11; EC:2.7.11.30	Transferring phosphorus-containing groups; Receptor protein serine/threonine kinase	IPR000719 (SMART); G3DSA:3.30.200.20 (GENE3D); IPR001245 (PFAM); IPR021820 (PFAM); G3DSA:1.10.510.10 (GENE3D); PTHR27002 (PANTHER); PTHR27002:SF836 (PANTHER); IPR008271 (PROSITE_PATTERNS); IPR000719 (PROSITE_PROFILES); cd14066 (CDD); IPR011009 (SUPERFAMILY)	P:GO:0006468; F:GO:0004672; F:GO:0004674; F:GO:0005524	P:protein phosphorylation; F:protein kinase activity; F:protein serine/threonine kinase activity; F:ATP binding
TRINITY_DN87284_c0_g2_i4	RecName: Full=Sulfate transporter 1.3	662	20	0	69.89	12	P:GO:0006817; P:GO:0009877; P:GO:0009970; P:GO:1902434; F:GO:0005515; F:GO:0008271; F:GO:0015293; F:GO:0015301; F:GO:0019001; C:GO:0005887; C:GO:0009506; C:GO:0031969	P:phosphate ion transport; P:nodulation; P:cellular response to sulfate starvation; P:sulfate import across plasma membrane; F:protein binding; F:secondary active sulfate transmembrane transporter activity; F:symporter activity; F:anion:anion antiporter activity; F:guanyl nucleotide binding; C:integral component of plasma membrane; C:plasmodesma; C:chloroplast membrane			IPR011547 (PFAM); IPR002645 (PFAM); IPR001902 (TIGRFAM); IPR036513 (G3DSA:3.30.750.GENE3D); mobidb-lite (MOBIDB_LITE); mobidb-lite (MOBIDB_LITE); PTHR11814:SF237 (PANTHER); IPR001902 (PANTHER); IPR018045 (PROSITE_PATTERNS); TRANSMEMBRANE (PHOBIUS); CYTOPLASMIC_DOMAIN (PHOBIUS); NON_CYTOPLASMIC_DOMAIN (PHOBIUS); CYTOPLASMIC_DOMAIN (PHOBIUS); TRANSMEMBRANE (PHOBIUS); TRANSMEMBRANE (PHOBIUS); TRANSM…	P:GO:0008272; P:GO:0055085; F:GO:0008271; F:GO:0015116; C:GO:0016020; C:GO:0016021	P:sulfate transport; P:transmembrane transport; F:secondary active sulfate transmembrane transporter activity; F:sulfate transmembrane transporter activity; C:membrane; C:integral component of membrane
TRINITY_DN91713_c1_g2_i2	RecName: Full=Sulfate transporter 1.3	313	20	3.42262e-150	68.66	15	P:GO:0006817; P:GO:0009877; P:GO:0009970; P:GO:1902434; F:GO:0005515; F:GO:0008271; F:GO:0015293; F:GO:0015301; C:GO:0005654; C:GO:0005765; C:GO:0005783; C:GO:0005794; C:GO:0005887; C:GO:0009506; C:GO:0031969	P:phosphate ion transport; P:nodulation; P:cellular response to sulfate starvation; P:sulfate import across plasma membrane; F:protein binding; F:secondary active sulfate transmembrane transporter activity; F:symporter activity; F:anion:anion antiporter activity; C:nucleoplasm; C:lysosomal membrane; C:endoplasmic reticulum; C:Golgi apparatus; C:integral component of plasma membrane; C:plasmodesma…			IPR011547 (PFAM); mobidb-lite (MOBIDB_LITE); mobidb-lite (MOBIDB_LITE); IPR001902 (PANTHER); PTHR11814:SF236 (PANTHER); IPR018045 (PROSITE_PATTERNS); TRANSMEMBRANE (PHOBIUS); CYTOPLASMIC_DOMAIN (PHOBIUS); TRANSMEMBRANE (PHOBIUS); TRANSMEMBRANE (PHOBIUS); CYTOPLASMIC_DOMAIN (PHOBIUS); TRANSMEMBRANE (PHOBIUS); CYTOPLASMIC_DOMAIN (PHOBIUS); NON_CYTOPLASMIC_DOMAIN (PHOBIUS); TRANSMEMBRANE (PHOBIUS); …	P:GO:0008272; P:GO:0055085; F:GO:0008271; F:GO:0015116; C:GO:0016020; C:GO:0016021	P:sulfate transport; P:transmembrane transport; F:secondary active sulfate transmembrane transporter activity; F:sulfate transmembrane transporter activity; C:membrane; C:integral component of membrane
TRINITY_DN89894_c1_g1_i4	RecName: Full=EGF domain-specific O-linked N-acetylglucosamine transferase; AltName: Full=Extracellular O-linked N-acetylglucosamine transferase; Flags: Precursor	520	14	1.69818e-114	50.16	5	P:GO:0009664; F:GO:0035252; F:GO:0052636; C:GO:0000139; C:GO:0016021	P:plant-type cell wall organization; F:UDP-xylosyltransferase activity; F:arabinosyltransferase activity; C:Golgi membrane; C:integral component of membrane			IPR007657 (PFAM); IPR007657 (PANTHER); PTHR20961:SF132 (PANTHER); TRANSMEMBRANE (PHOBIUS); CYTOPLASMIC_DOMAIN (PHOBIUS); NON_CYTOPLASMIC_DOMAIN (PHOBIUS); TMhelix (TMHMM)	F:GO:0016757	F:transferase activity, transferring glycosyl groups
TRINITY_DN80365_c0_g2_i2	RecName: Full=Putative disease resistance protein RGA1; AltName: Full=RGA3-blb	721	20	3.63825e-107	48.98	13	P:GO:0009626; P:GO:0009817; P:GO:0050776; P:GO:0050829; F:GO:0004016; F:GO:0005524; F:GO:0043531; F:GO:0043621; C:GO:0005634; C:GO:0005737; C:GO:0009506; C:GO:0012505; C:GO:0019897	P:plant-type hypersensitive response; P:defense response to fungus, incompatible interaction; P:regulation of immune response; P:defense response to Gram-negative bacterium; F:adenylate cyclase activity; F:ATP binding; F:ADP binding; F:protein self-association; C:nucleus; C:cytoplasm; C:plasmodesma; C:endomembrane system; C:extrinsic component of plasma membrane	EC:4.6.1.1	Adenylate cyclase	PR00364 (PRINTS); IPR032675 (G3DSA:3.80.10.GENE3D); IPR002182 (PFAM); PTHR23155:SF1055 (PANTHER); PTHR23155 (PANTHER); IPR027417 (SUPERFAMILY); SSF52058 (SUPERFAMILY)	F:GO:0043531	F:ADP binding
TRINITY_DN78799_c1_g1_i1	RecName: Full=Patatin-like protein 1	294	20	5.89406e-100	61.53	15	P:GO:0009626; P:GO:0009737; P:GO:0010311; P:GO:0016042; P:GO:0031408; P:GO:0046686; P:GO:0051607; P:GO:0071456; F:GO:0004620; F:GO:0016740; F:GO:0042802; F:GO:0045735; F:GO:0047372; C:GO:0005773; C:GO:0016020	P:plant-type hypersensitive response; P:response to abscisic acid; P:lateral root formation; P:lipid catabolic process; P:oxylipin biosynthetic process; P:response to cadmium ion; P:defense response to virus; P:cellular response to hypoxia; F:phospholipase activity; F:transferase activity; F:identical protein binding; F:nutrient reservoir activity; F:acylglycerol lipase activity; C:vacuole; C:mem…	EC:3.1.1.23; EC:3.1.1.1	Acylglycerol lipase; Carboxylesterase	G3DSA:3.40.1090.10 (GENE3D); IPR002641 (PFAM); PTHR32176:SF49 (PANTHER); PTHR32176 (PANTHER); IPR002641 (PROSITE_PROFILES); IPR016035 (SUPERFAMILY)	P:GO:0006629	P:lipid metabolic process
TRINITY_DN78799_c1_g1_i5	RecName: Full=Patatin-like protein 2; Short=AtPLP2; AltName: Full=Patatin-related phospholipase A IIalpha; Short=pPLAIIa; AltName: Full=Phospholipase A IIA; Short=AtPLAIIA	124	20	5.48507e-49	70.88	14	P:GO:0009626; P:GO:0009737; P:GO:0010311; P:GO:0016042; P:GO:0031408; P:GO:0046686; P:GO:0051607; P:GO:0071456; F:GO:0004620; F:GO:0042802; F:GO:0045735; F:GO:0047372; C:GO:0005773; C:GO:0016020	P:plant-type hypersensitive response; P:response to abscisic acid; P:lateral root formation; P:lipid catabolic process; P:oxylipin biosynthetic process; P:response to cadmium ion; P:defense response to virus; P:cellular response to hypoxia; F:phospholipase activity; F:identical protein binding; F:nutrient reservoir activity; F:acylglycerol lipase activity; C:vacuole; C:membrane	EC:3.1.1.23; EC:3.1.1.1	Acylglycerol lipase; Carboxylesterase	G3DSA:3.40.1090.10 (GENE3D); IPR002641 (PFAM); PTHR32176:SF72 (PANTHER); PTHR32176 (PANTHER); IPR002641 (PROSITE_PROFILES); IPR016035 (SUPERFAMILY); TMhelix (TMHMM); TMhelix (TMHMM)	P:GO:0006629	P:lipid metabolic process
TRINITY_DN66633_c0_g1_i2	RecName: Full=MACPF domain-containing protein CAD1; AltName: Full=Protein CONSTITUTIVELY ACTIVATED CELL DEATH 1; Short=Protein CAD1	428	4	0	62.83	5	P:GO:0009626; P:GO:0009651; P:GO:0010337; P:GO:0052542; C:GO:0005886	P:plant-type hypersensitive response; P:response to salt stress; P:regulation of salicylic acid metabolic process; P:defense response by callose deposition; C:plasma membrane			IPR020864 (PFAM); mobidb-lite (MOBIDB_LITE); mobidb-lite (MOBIDB_LITE); PTHR33199 (PANTHER); PTHR33199:SF3 (PANTHER); IPR020864 (PROSITE_PROFILES)	no GO terms	no GO terms
TRINITY_DN75178_c0_g1_i2	RecName: Full=Protein TIFY 9; AltName: Full=Jasmonate ZIM domain-containing protein 10; AltName: Full=Protein JASMONATE-ASSOCIATED 1; AltName: Full=Protein JAZ10	192	20	7.64869e-43	57.43	12	P:GO:0009555; P:GO:0009611; P:GO:0009733; P:GO:0009751; P:GO:0009908; P:GO:0010112; P:GO:0042742; P:GO:1900067; P:GO:2000022; F:GO:0042803; C:GO:0005634; C:GO:0005829	P:pollen development; P:response to wounding; P:response to auxin; P:response to salicylic acid; P:flower development; P:regulation of systemic acquired resistance; P:defense response to bacterium; P:regulation of cellular response to alkaline pH; P:regulation of jasmonic acid mediated signaling pathway; F:protein homodimerization activity; C:nucleus; C:cytosol			IPR010399 (SMART); IPR018467 (PFAM); IPR010399 (PFAM); mobidb-lite (MOBIDB_LITE); IPR040390 (PANTHER); PTHR33077:SF5 (PANTHER); IPR010399 (PROSITE_PROFILES)	no GO terms	no GO terms
TRINITY_DN84119_c0_g1_i2	RecName: Full=Benzyl alcohol O-benzoyltransferase; AltName: Full=Benzoyl coenzyme A:benzyl alcohol benzoyl transferase	279	20	4.28853e-101	53.18	16	P:GO:0006595; P:GO:0009821; P:GO:0010345; P:GO:0010597; P:GO:0042617; P:GO:0052325; P:GO:0090431; F:GO:0010327; F:GO:0047203; F:GO:0050266; F:GO:0050642; F:GO:0050734; F:GO:0080073; F:GO:0090430; F:GO:0102165; F:GO:0102406	P:polyamine metabolic process; P:alkaloid biosynthetic process; P:suberin biosynthetic process; P:green leaf volatile biosynthetic process; P:paclitaxel biosynthetic process; P:cell wall pectin biosynthetic process; P:alkyl caffeate ester biosynthetic process; F:acetyl CoA:(Z)-3-hexen-1-ol acetyltransferase activity; F:13-hydroxylupinine O-tigloyltransferase activity; F:rosmarinate synthase activ…	EC:2.3.1.195; EC:2.3.1.140; EC:2.3.1.93; EC:2.3.1.188; EC:2.3.1.166	(Z)-3-hexen-1-ol acetyltransferase; Rosmarinate synthase; 13-hydroxylupanine O-tigloyltransferase; Omega-hydroxypalmitate O-feruloyl transferase; 2-alpha-hydroxytaxane 2-O-benzoyltransferase	IPR023213 (G3DSA:3.30.559.GENE3D); IPR023213 (G3DSA:3.30.559.GENE3D); IPR003480 (PFAM); PTHR31642:SF242 (PANTHER); PTHR31642 (PANTHER)	F:GO:0016747	F:transferase activity, transferring acyl groups other than amino-acyl groups
TRINITY_DN91258_c1_g1_i2	RecName: Full=Casein kinase I isoform delta; Short=CKI-delta; Short=CKId; AltName: Full=Tau-protein kinase CSNK1D	154	20	3.18999e-42	82.75	54	P:GO:0001934; P:GO:0006897; P:GO:0007020; P:GO:0007030; P:GO:0009409; P:GO:0009640; P:GO:0009741; P:GO:0009785; P:GO:0009850; P:GO:0010389; P:GO:0018105; P:GO:0030178; P:GO:0032091; P:GO:0032436; P:GO:0032922; P:GO:0034067; P:GO:0042752; P:GO:0043622; P:GO:0046777; P:GO:0048208; P:GO:0048364; P:GO:0048512; P:GO:0051225; P:GO:0051510; P:GO:0061512; P:GO:0071539; P:GO:0090263; P:GO:0097711; P:GO:19…	P:positive regulation of protein phosphorylation; P:endocytosis; P:microtubule nucleation; P:Golgi organization; P:response to cold; P:photomorphogenesis; P:response to brassinosteroid; P:blue light signaling pathway; P:auxin metabolic process; P:regulation of G2/M transition of mitotic cell cycle; P:peptidyl-serine phosphorylation; P:negative regulation of Wnt signaling pathway; P:negative regul…	EC:2.7.11; EC:2.7.11.26; EC:2.7.12.1	Transferring phosphorus-containing groups; [Tau protein] kinase; Dual-specificity kinase	G3DSA:1.10.510.10 (GENE3D); PTHR11909:SF396 (PANTHER); PTHR11909 (PANTHER); IPR011009 (SUPERFAMILY)	no GO terms	no GO terms
TRINITY_DN90504_c0_g1_i2	RecName: Full=Bifunctional epoxide hydrolase 2; Includes: RecName: Full=Cytosolic epoxide hydrolase 2; Short=CEH; AltName: Full=Epoxide hydratase; AltName: Full=Soluble epoxide hydrolase; Short=SEH; Includes: RecName: Full=Lipid-phosphate phosphatase	371	20	1.00643e-24	52.88	48	P:GO:0002539; P:GO:0006625; P:GO:0006654; P:GO:0009102; P:GO:0009636; P:GO:0010628; P:GO:0015996; P:GO:0016042; P:GO:0019233; P:GO:0019373; P:GO:0036152; P:GO:0042203; P:GO:0042632; P:GO:0042759; P:GO:0043640; P:GO:0043651; P:GO:0045150; P:GO:0045777; P:GO:0046232; P:GO:0046272; P:GO:0046839; P:GO:0070292; P:GO:0090181; P:GO:0097176; F:GO:0000287; F:GO:0004301; F:GO:0004622; F:GO:0004742; F:GO:00…	P:prostaglandin production involved in inflammatory response; P:protein targeting to peroxisome; P:phosphatidic acid biosynthetic process; P:biotin biosynthetic process; P:response to toxic substance; P:positive regulation of gene expression; P:chlorophyll catabolic process; P:lipid catabolic process; P:sensory perception of pain; P:epoxygenase P450 pathway; P:phosphatidylethanolamine acyl-chain …	EC:3.3.2.10; EC:3.3.2.9; EC:3.1.3.76; EC:2.3.1.38; EC:3.1.1.5; EC:3.7.1.9; EC:2.3.1.12; EC:3.1.1.1; EC:3.7.1.13	Soluble epoxide hydrolase; Microsomal epoxide hydrolase; Lipid-phosphate phosphatase; [Acyl-carrier-protein] S-acetyltransferase; Lysophospholipase; 2-hydroxymuconate-6-semialdehyde hydrolase; Dihydrolipoyllysine-residue acetyltransferase; Carboxylesterase; 2-hydroxy-6-oxo-6-(2-aminophenyl)hexa-2,4-dienoate hydrolase	IPR000639 (PRINTS); IPR000073 (PRINTS); IPR000073 (PFAM); IPR029058 (G3DSA:3.40.50.GENE3D); PTHR46438 (PANTHER); PTHR46438:SF8 (PANTHER); IPR029058 (SUPERFAMILY)	F:GO:0003824	F:catalytic activity
TRINITY_DN65636_c0_g1_i1	RecName: Full=G-type lectin S-receptor-like serine/threonine-protein kinase LECRK2; Short=OsLecRK2; Flags: Precursor	825	20	0	49.87	10	P:GO:0046777; P:GO:0048544; P:GO:1900459; F:GO:0004674; F:GO:0005516; F:GO:0005524; F:GO:0030246; F:GO:0031625; C:GO:0005886; C:GO:0016021	P:protein autophosphorylation; P:recognition of pollen; P:positive regulation of brassinosteroid mediated signaling pathway; F:protein serine/threonine kinase activity; F:calmodulin binding; F:ATP binding; F:carbohydrate binding; F:ubiquitin protein ligase binding; C:plasma membrane; C:integral component of membrane	EC:2.7.11	Transferring phosphorus-containing groups	IPR000719 (SMART); IPR003609 (SMART); IPR001480 (SMART); IPR000719 (PFAM); IPR000858 (PFAM); IPR001480 (PFAM); IPR036426 (G3DSA:2.90.10.GENE3D); G3DSA:3.50.4.10 (GENE3D); G3DSA:3.30.200.20 (GENE3D); IPR024171 (PIRSF); PTHR47974:SF3 (PANTHER); PTHR47974:SF3 (PANTHER); PTHR47974 (PANTHER); IPR008271 (PROSITE_PATTERNS); NON_CYTOPLASMIC_DOMAIN (PHOBIUS); SIGNAL_PEPTIDE_H_REGION (PHOBIUS); SIGNAL_PEPT…	P:GO:0006468; P:GO:0048544; F:GO:0004672; F:GO:0004674; F:GO:0005524	P:protein phosphorylation; P:recognition of pollen; F:protein kinase activity; F:protein serine/threonine kinase activity; F:ATP binding
TRINITY_DN90095_c0_g1_i1	RecName: Full=Probable protein phosphatase 2C 12; Short=AtPP2C12	179	8	9.81673e-79	72.12	5	P:GO:0006470; F:GO:0004722; F:GO:0046872; C:GO:0005829; C:GO:0005886	P:protein dephosphorylation; F:protein serine/threonine phosphatase activity; F:metal ion binding; C:cytosol; C:plasma membrane	EC:3.1.3.16	Protein-serine/threonine phosphatase	PTHR47992 (PANTHER); PTHR47992:SF51 (PANTHER); NON_CYTOPLASMIC_DOMAIN (PHOBIUS); TRANSMEMBRANE (PHOBIUS); CYTOPLASMIC_DOMAIN (PHOBIUS); SignalP-noTM (SIGNALP_EUK)	no GO terms	no GO terms
TRINITY_DN92189_c0_g2_i6	RecName: Full=Arf-GAP with coiled-coil, ANK repeat and PH domain-containing protein 2; AltName: Full=Centaurin-beta-2; Short=Cnt-b2	793	20	0	48.76	33	P:GO:0006606; P:GO:0007010; P:GO:0007165; P:GO:0009733; P:GO:0009965; P:GO:0010051; P:GO:0010087; P:GO:0032456; P:GO:0034614; P:GO:0043161; P:GO:0048259; P:GO:0048768; P:GO:0055059; P:GO:0060582; P:GO:0072375; P:GO:0090630; P:GO:1990090; F:GO:0003924; F:GO:0005096; F:GO:0005525; F:GO:0017137; F:GO:0031593; F:GO:0046872; F:GO:0080025; C:GO:0001726; C:GO:0005634; C:GO:0005794; C:GO:0005829; C:GO:00…	P:protein import into nucleus; P:cytoskeleton organization; P:signal transduction; P:response to auxin; P:leaf morphogenesis; P:xylem and phloem pattern formation; P:phloem or xylem histogenesis; P:endocytic recycling; P:cellular response to reactive oxygen species; P:proteasome-mediated ubiquitin-dependent protein catabolic process; P:regulation of receptor-mediated endocytosis; P:root hair cell…	EC:3.6.1.15	Nucleoside-triphosphate phosphatase	Coil (COILS); Coil (COILS); IPR001164 (PRINTS); IPR004148 (SMART); IPR002110 (SMART); IPR001849 (SMART); IPR001164 (SMART); IPR001849 (PFAM); IPR001164 (PFAM); IPR027267 (G3DSA:1.20.1270.GENE3D); IPR038508 (G3DSA:3.30.40.GENE3D); PF16746 (PFAM); PF13637 (PFAM); IPR036770 (G3DSA:1.25.40.GENE3D); mobidb-lite (MOBIDB_LITE); mobidb-lite (MOBIDB_LITE); mobidb-lite (MOBIDB_LITE); mobidb-lite (MOBIDB_LI…	F:GO:0005096; F:GO:0005515; C:GO:0005737	F:GTPase activator activity; F:protein binding; C:cytoplasm
TRINITY_DN87202_c3_g3_i1	RecName: Full=CBL-interacting protein kinase 5; AltName: Full=OsCIPK05	411	20	0	75.02	19	P:GO:0006468; P:GO:0007275; P:GO:0007584; P:GO:0009414; P:GO:0009788; P:GO:0010118; P:GO:0010540; P:GO:0035556; P:GO:0042538; P:GO:0071805; F:GO:0004674; F:GO:0005267; F:GO:0005515; F:GO:0005524; C:GO:0005634; C:GO:0005783; C:GO:0005829; C:GO:0005886; C:GO:0009536	P:protein phosphorylation; P:multicellular organism development; P:response to nutrient; P:response to water deprivation; P:negative regulation of abscisic acid-activated signaling pathway; P:stomatal movement; P:basipetal auxin transport; P:intracellular signal transduction; P:hyperosmotic salinity response; P:potassium ion transmembrane transport; F:protein serine/threonine kinase activity; F:p…	EC:2.7.11	Transferring phosphorus-containing groups	IPR000719 (SMART); IPR000719 (PFAM); G3DSA:1.10.510.10 (GENE3D); G3DSA:3.30.310.80 (GENE3D); IPR004041 (PFAM); mobidb-lite (MOBIDB_LITE); mobidb-lite (MOBIDB_LITE); PTHR43895 (PANTHER); PTHR43895:SF3 (PANTHER); IPR008271 (PROSITE_PATTERNS); IPR017441 (PROSITE_PATTERNS); NON_CYTOPLASMIC_DOMAIN (PHOBIUS); TRANSMEMBRANE (PHOBIUS); CYTOPLASMIC_DOMAIN (PHOBIUS); IPR018451 (PROSITE_PROFILES); IPR000719…	P:GO:0006468; P:GO:0007165; F:GO:0004672; F:GO:0005524	P:protein phosphorylation; P:signal transduction; F:protein kinase activity; F:ATP binding
TRINITY_DN75921_c0_g1_i7	RecName: Full=Probable plastid-lipid-associated protein 14, chloroplastic; Short=AtPap14; AltName: Full=Fibrillin-11; AltName: Full=OBP3-responsive protein 1; Flags: Precursor	316	4	1.21285e-150	52.68	8	P:GO:0006468; P:GO:0051726; F:GO:0004693; F:GO:0005515; F:GO:0005524; F:GO:0008353; C:GO:0009507; C:GO:0016592	P:protein phosphorylation; P:regulation of cell cycle; F:cyclin-dependent protein serine/threonine kinase activity; F:protein binding; F:ATP binding; F:RNA polymerase II CTD heptapeptide repeat kinase activity; C:chloroplast; C:mediator complex	EC:2.7.11; EC:2.7.11.23; EC:2.7.11.22	Transferring phosphorus-containing groups; [RNA-polymerase]-subunit kinase; Cyclin-dependent kinase	G3DSA:1.10.510.10 (GENE3D); PTHR24056:SF422 (PANTHER); PTHR24056 (PANTHER); IPR000719 (PROSITE_PROFILES); IPR011009 (SUPERFAMILY)	P:GO:0006468; F:GO:0004672; F:GO:0005524	P:protein phosphorylation; F:protein kinase activity; F:ATP binding
TRINITY_DN79465_c0_g3_i3	RecName: Full=Thaumatin-like protein 1; Flags: Precursor	315	20	3.95291e-95	63.89	35	P:GO:0006468; P:GO:0007178; P:GO:0009615; P:GO:0009627; P:GO:0009651; P:GO:0009682; P:GO:0009723; P:GO:0009737; P:GO:0009751; P:GO:0010224; P:GO:0010951; P:GO:0031540; P:GO:0046686; P:GO:0050832; P:GO:0051841; P:GO:0090501; P:GO:1904550; F:GO:0004338; F:GO:0004540; F:GO:0004563; F:GO:0004567; F:GO:0004568; F:GO:0004629; F:GO:0004675; F:GO:0004867; F:GO:0005524; F:GO:0008233; F:GO:0019863; F:GO:00…	P:protein phosphorylation; P:transmembrane receptor protein serine/threonine kinase signaling pathway; P:response to virus; P:systemic acquired resistance; P:response to salt stress; P:induced systemic resistance; P:response to ethylene; P:response to abscisic acid; P:response to salicylic acid; P:response to UV-B; P:negative regulation of endopeptidase activity; P:regulation of anthocyanin biosy…	EC:2.7.11; EC:3.2.1.21; EC:3.2.1.52; EC:3.1.4.3; EC:3.2.1.58; EC:3.2.1.14; EC:3.2.1.25; EC:3.2.1.39; EC:2.7.11.30	Transferring phosphorus-containing groups; Beta-glucosidase; Beta-N-acetylhexosaminidase; Phospholipase C; Glucan 1,3-beta-glucosidase; Chitinase; Beta-mannosidase; Glucan endo-1,3-beta-D-glucosidase; Receptor protein serine/threonine kinase	IPR001938 (PRINTS); IPR001938 (SMART); IPR001938 (PIRSF); IPR001938 (PFAM); IPR037176 (G3DSA:2.60.110.GENE3D); PTHR31048:SF143 (PANTHER); IPR001938 (PANTHER); IPR017949 (PROSITE_PATTERNS); SIGNAL_PEPTIDE_N_REGION (PHOBIUS); NON_CYTOPLASMIC_DOMAIN (PHOBIUS); SIGNAL_PEPTIDE_C_REGION (PHOBIUS); SIGNAL_PEPTIDE_H_REGION (PHOBIUS); TRANSMEMBRANE (PHOBIUS); SIGNAL_PEPTIDE (PHOBIUS); CYTOPLASMIC_DOMAIN (…	no GO terms	no GO terms
TRINITY_DN89542_c4_g6_i8	RecName: Full=E3 ubiquitin-protein ligase sina; AltName: Full=RING-type E3 ubiquitin transferase sina; AltName: Full=Seven in absentia protein	192	20	1.35128e-111	68.13	43	P:GO:0000209; P:GO:0007093; P:GO:0007141; P:GO:0007264; P:GO:0007283; P:GO:0007411; P:GO:0007601; P:GO:0009791; P:GO:0016579; P:GO:0031396; P:GO:0031648; P:GO:0032436; P:GO:0035883; P:GO:0040014; P:GO:0042752; P:GO:0043154; P:GO:0045500; P:GO:0045676; P:GO:0051402; P:GO:0080148; P:GO:0090090; P:GO:1902842; P:GO:1903507; P:GO:2000785; P:GO:2001237; P:GO:2001244; F:GO:0003714; F:GO:0008022; F:GO:00…	P:protein polyubiquitination; P:mitotic cell cycle checkpoint; P:male meiosis I; P:small GTPase mediated signal transduction; P:spermatogenesis; P:axon guidance; P:visual perception; P:post-embryonic development; P:protein deubiquitination; P:regulation of protein ubiquitination; P:protein destabilization; P:positive regulation of proteasomal ubiquitin-dependent protein catabolic process; P:enter…			IPR018121 (PFAM); IPR013083 (G3DSA:3.30.40.GENE3D); IPR013083 (G3DSA:3.30.40.GENE3D); PTHR10315 (PANTHER); PTHR10315:SF77 (PANTHER); TRANSMEMBRANE (PHOBIUS); NON_CYTOPLASMIC_DOMAIN (PHOBIUS); CYTOPLASMIC_DOMAIN (PHOBIUS); IPR001841 (PROSITE_PROFILES); IPR013010 (PROSITE_PROFILES); cd16571 (CDD); IPR008974 (SUPERFAMILY); SSF57850 (SUPERFAMILY)	P:GO:0006511; P:GO:0007275; F:GO:0005515; F:GO:0008270; C:GO:0005737	P:ubiquitin-dependent protein catabolic process; P:multicellular organism development; F:protein binding; F:zinc ion binding; C:cytoplasm
TRINITY_DN85109_c0_g5_i1	RecName: Full=Ankyrin repeat, SAM and basic leucine zipper domain-containing protein 1; AltName: Full=Germ cell-specific ankyrin, SAM and basic leucine zipper domain-containing protein	62	20	3.72144e-32	64.53	39	P:GO:0000209; P:GO:0006355; P:GO:0007140; P:GO:0007283; P:GO:0007409; P:GO:0018345; P:GO:0031047; P:GO:0032436; P:GO:0034058; P:GO:0034587; P:GO:0042147; P:GO:0043046; P:GO:0045036; P:GO:0048549; P:GO:0090160; P:GO:1903830; F:GO:0015095; F:GO:0017137; F:GO:0019706; F:GO:0030941; F:GO:0031624; F:GO:0046872; F:GO:0051861; F:GO:0061630; F:GO:1901981; C:GO:0000139; C:GO:0000151; C:GO:0005634; C:GO:00…	P:protein polyubiquitination; P:regulation of transcription, DNA-templated; P:male meiotic nuclear division; P:spermatogenesis; P:axonogenesis; P:protein palmitoylation; P:gene silencing by RNA; P:positive regulation of proteasomal ubiquitin-dependent protein catabolic process; P:endosomal vesicle fusion; P:piRNA metabolic process; P:retrograde transport, endosome to Golgi; P:DNA methylation invo…	EC:2.3.1.225	Protein S-acyltransferase	IPR002110 (SMART); PF13857 (PFAM); IPR036770 (G3DSA:1.25.40.GENE3D); PTHR24203 (PANTHER); PTHR24203:SF58 (PANTHER); IPR002110 (PROSITE_PROFILES); IPR020683 (PROSITE_PROFILES); IPR036770 (SUPERFAMILY)	F:GO:0005515	F:protein binding
TRINITY_DN83295_c0_g1_i4	RecName: Full=Protein YhjJ; Flags: Precursor	1009	20	0	48.51	8	P:GO:0006627; P:GO:0006851; F:GO:0004222; F:GO:0046872; C:GO:0005743; C:GO:0005829; C:GO:0009570; C:GO:0017087	P:protein processing involved in protein targeting to mitochondrion; P:mitochondrial calcium ion transmembrane transport; F:metalloendopeptidase activity; F:metal ion binding; C:mitochondrial inner membrane; C:cytosol; C:chloroplast stroma; C:mitochondrial processing peptidase complex	EC:3.4.24.70; EC:3.4.99; EC:3.4.24.71; EC:3.4.24; EC:3.4.24.61; EC:3.4.24.72; EC:3.4.24.23; EC:3.4.24.56; EC:3.4.24.24; EC:3.4.24.35; EC:3.4.24.57; EC:3.4.24.14; EC:3.4.24.69; EC:3.4.24.37; EC:3.4.24.59; EC:3.4.24.64; EC:3.4.24.21; EC:3.4.24.11; EC:3.4.24.22; EC:3.4.24.55; EC:3.4.24.17; EC:3.4.24.18; EC:3.4.24.19	Oligopeptidase A; Acting on peptide bonds (peptidases); Endothelin-converting enzyme 1; Acting on peptide bonds (peptidases); Nardilysin; Fibrolase; Matrilysin; Insulysin; Gelatinase A; Gelatinase B; O-sialoglycoprotein endopeptidase; Procollagen N-endopeptidase; Bontoxilysin; Saccharolysin; Mitochondrial intermediate peptidase; Mitochondrial processing peptidase; Astacin; Neprilysin; Stromelysin…	G3DSA:3.30.830.10 (GENE3D); IPR011765 (PFAM); G3DSA:3.30.830.10 (GENE3D); IPR007863 (PFAM); G3DSA:3.30.830.10 (GENE3D); G3DSA:3.30.830.10 (GENE3D); PTHR43690 (PANTHER); PTHR43690:SF20 (PANTHER); IPR001431 (PROSITE_PATTERNS); NON_CYTOPLASMIC_DOMAIN (PHOBIUS); CYTOPLASMIC_DOMAIN (PHOBIUS); TRANSMEMBRANE (PHOBIUS); IPR011249 (SUPERFAMILY); IPR011249 (SUPERFAMILY); IPR011249 (SUPERFAMILY)	P:GO:0006508; F:GO:0046872	P:proteolysis; F:metal ion binding
TRINITY_DN82124_c1_g1_i2	RecName: Full=Aspartic proteinase Asp1; Short=OSAP1; Short=OsAsp1; AltName: Full=Nucellin-like protein; Flags: Precursor	78	4	8.66928e-16	66.97	5	P:GO:0006508; P:GO:0050832; F:GO:0004190; F:GO:0005515; C:GO:0016021	P:proteolysis; P:defense response to fungus; F:aspartic-type endopeptidase activity; F:protein binding; C:integral component of membrane	EC:3.4.99; EC:3.4.23.1; EC:3.4.23; EC:3.4.23.32; EC:3.4.23.43; EC:3.4.23.20; EC:3.4.23.25; EC:3.4.23.36; EC:3.4.23.4; EC:3.4.23.35; EC:3.4.23.5; EC:3.4.23.34; EC:3.4.23.15	Acting on peptide bonds (peptidases); Pepsin A; Acting on peptide bonds (peptidases); Scytalidopepsin B; Prepilin peptidase; Penicillopepsin; Saccharopepsin; Signal peptidase II; Chymosin; Barrierpepsin; Cathepsin D; Cathepsin E; Renin	IPR032861 (PFAM); IPR021109 (G3DSA:2.40.70.GENE3D); PTHR13683:SF227 (PANTHER); IPR001461 (PANTHER); IPR021109 (SUPERFAMILY)	P:GO:0006508; F:GO:0004190	P:proteolysis; F:aspartic-type endopeptidase activity
TRINITY_DN84893_c2_g2_i6	RecName: Full=Histone H2A deubiquitinase MYSM1; Short=2A-DUB; AltName: Full=Myb-like, SWIRM and MPN domain-containing protein 1	763	20	2.58389e-84	73.97	24	P:GO:0006508; P:GO:0009409; P:GO:0009734; P:GO:0009845; P:GO:0009909; P:GO:0010243; P:GO:0010600; P:GO:0032922; P:GO:0042753; P:GO:0042754; P:GO:0043254; P:GO:0043433; P:GO:0043966; P:GO:0045892; P:GO:0045944; P:GO:0048574; F:GO:0000976; F:GO:0003700; F:GO:0005515; F:GO:0008237; F:GO:0046872; F:GO:0070122; C:GO:0005737; C:GO:0016514	P:proteolysis; P:response to cold; P:auxin-activated signaling pathway; P:seed germination; P:regulation of flower development; P:response to organonitrogen compound; P:regulation of auxin biosynthetic process; P:circadian regulation of gene expression; P:positive regulation of circadian rhythm; P:negative regulation of circadian rhythm; P:regulation of protein-containing complex assembly; P:nega…			Coil (COILS); IPR001005 (SMART); IPR001005 (PFAM); IPR006447 (TIGRFAM); G3DSA:1.10.10.60 (GENE3D); mobidb-lite (MOBIDB_LITE); mobidb-lite (MOBIDB_LITE); mobidb-lite (MOBIDB_LITE); mobidb-lite (MOBIDB_LITE); mobidb-lite (MOBIDB_LITE); mobidb-lite (MOBIDB_LITE); mobidb-lite (MOBIDB_LITE); mobidb-lite (MOBIDB_LITE); mobidb-lite (MOBIDB_LITE); mobidb-lite (MOBIDB_LITE); PTHR12802:SF109 (PANTHER); PTH…	F:GO:0003677	F:DNA binding
TRINITY_DN56400_c0_g2_i2	RecName: Full=Glutamyl-tRNA reductase; Short=GluTR	273	20	7.42127e-127	69.35	8	P:GO:0006782; P:GO:0006979; P:GO:0015995; P:GO:0055114; F:GO:0005515; F:GO:0008883; F:GO:0050661; C:GO:0031969	P:protoporphyrinogen IX biosynthetic process; P:response to oxidative stress; P:chlorophyll biosynthetic process; P:oxidation-reduction process; F:protein binding; F:glutamyl-tRNA reductase activity; F:NADP binding; C:chloroplast membrane	EC:1.2.1.70	Glutamyl-tRNA reductase	Coil (COILS); IPR006151 (PFAM); IPR015896 (PFAM); G3DSA:3.40.50.720 (GENE3D); PTHR43120 (PANTHER); PTHR43120:SF13 (PANTHER); IPR036453 (SUPERFAMILY); IPR036291 (SUPERFAMILY)	P:GO:0033014; P:GO:0055114; F:GO:0008883; F:GO:0050661	P:tetrapyrrole biosynthetic process; P:oxidation-reduction process; F:glutamyl-tRNA reductase activity; F:NADP binding
TRINITY_DN81153_c0_g2_i1	RecName: Full=Glutamyl-tRNA reductase; Short=GluTR	534	20	0	76.92	9	P:GO:0006782; P:GO:0006979; P:GO:0015995; P:GO:0055114; F:GO:0005515; F:GO:0008883; F:GO:0050661; C:GO:0009842; C:GO:0031969	P:protoporphyrinogen IX biosynthetic process; P:response to oxidative stress; P:chlorophyll biosynthetic process; P:oxidation-reduction process; F:protein binding; F:glutamyl-tRNA reductase activity; F:NADP binding; C:cyanelle; C:chloroplast membrane	EC:1.2.1.70	Glutamyl-tRNA reductase	Coil (COILS); IPR015896 (PFAM); IPR000343 (TIGRFAM); IPR006151 (PFAM); IPR015895 (PFAM); G3DSA:3.40.50.720 (GENE3D); IPR036343 (G3DSA:3.30.460.GENE3D); PTHR43120 (PANTHER); PTHR43120:SF13 (PANTHER); IPR018214 (PROSITE_PATTERNS); IPR000343 (HAMAP); cd05213 (CDD); IPR036291 (SUPERFAMILY); IPR036453 (SUPERFAMILY); IPR036343 (SUPERFAMILY)	P:GO:0033014; P:GO:0055114; F:GO:0008883; F:GO:0050661	P:tetrapyrrole biosynthetic process; P:oxidation-reduction process; F:glutamyl-tRNA reductase activity; F:NADP binding
TRINITY_DN34770_c0_g2_i1	RecName: Full=Protein EARLY FLOWERING 4; AltName: Full=Protein ARRHYTHMIC 44	100	5	3.61706e-24	77.82	9	P:GO:0009585; P:GO:0009649; P:GO:0009909; P:GO:0010114; P:GO:0042753; P:GO:0048573; P:GO:0080167; F:GO:0042803; C:GO:0005634	P:red, far-red light phototransduction; P:entrainment of circadian clock; P:regulation of flower development; P:response to red light; P:positive regulation of circadian rhythm; P:photoperiodism, flowering; P:response to karrikin; F:protein homodimerization activity; C:nucleus			IPR009741 (PFAM); mobidb-lite (MOBIDB_LITE); PTHR33469:SF5 (PANTHER); IPR040462 (PANTHER)	P:GO:0042753	P:positive regulation of circadian rhythm
TRINITY_DN92404_c0_g2_i6	RecName: Full=Probable leucine-rich repeat receptor-like serine/threonine-protein kinase At3g14840; Flags: Precursor	351	20	2.34187e-125	55.69	41	P:GO:0001558; P:GO:0006898; P:GO:0007178; P:GO:0009553; P:GO:0009664; P:GO:0009755; P:GO:0009861; P:GO:0009944; P:GO:0009965; P:GO:0010067; P:GO:0010089; P:GO:0010103; P:GO:0010148; P:GO:0010183; P:GO:0010223; P:GO:0010359; P:GO:0016045; P:GO:0030154; P:GO:0030155; P:GO:0042742; P:GO:0045088; P:GO:0046777; P:GO:0048281; P:GO:0048481; P:GO:0050832; P:GO:0051302; P:GO:0052544; P:GO:0070370; P:GO:19…	P:regulation of cell growth; P:receptor-mediated endocytosis; P:transmembrane receptor protein serine/threonine kinase signaling pathway; P:embryo sac development; P:plant-type cell wall organization; P:hormone-mediated signaling pathway; P:jasmonic acid and ethylene-dependent systemic resistance; P:polarity specification of adaxial/abaxial axis; P:leaf morphogenesis; P:procambium histogenesis; P…	EC:2.7.11; EC:2.7.11.30	Transferring phosphorus-containing groups; Receptor protein serine/threonine kinase	IPR032675 (G3DSA:3.80.10.GENE3D); IPR032675 (G3DSA:3.80.10.GENE3D); IPR001611 (PFAM); PTHR27006 (PANTHER); PTHR27006:SF388 (PANTHER); SIGNAL_PEPTIDE_N_REGION (PHOBIUS); SIGNAL_PEPTIDE (PHOBIUS); SIGNAL_PEPTIDE_C_REGION (PHOBIUS); SIGNAL_PEPTIDE_H_REGION (PHOBIUS); NON_CYTOPLASMIC_DOMAIN (PHOBIUS); SignalP-noTM (SIGNALP_EUK); SignalP-noTM (SIGNALP_GRAM_NEGATIVE); SignalP-TM (SIGNALP_GRAM_POSITIVE)…	F:GO:0005515	F:protein binding
TRINITY_DN46750_c0_g1_i1	RecName: Full=Protein SULFUR DEFICIENCY-INDUCED 1; Short=AtSDI1	297	5	3.70551e-141	75.34	10	P:GO:0006792; P:GO:0007140; P:GO:0009556; P:GO:0009658; P:GO:0010438; P:GO:0010439; P:GO:0051301; F:GO:0005515; C:GO:0005634; C:GO:0017053	P:regulation of sulfur utilization; P:male meiotic nuclear division; P:microsporogenesis; P:chloroplast organization; P:cellular response to sulfur starvation; P:regulation of glucosinolate biosynthetic process; P:cell division; F:protein binding; C:nucleus; C:transcription repressor complex			IPR019734 (PFAM); IPR011990 (G3DSA:1.25.40.GENE3D); PTHR36326:SF14 (PANTHER); PTHR36326 (PANTHER); IPR011990 (SUPERFAMILY)	F:GO:0005515	F:protein binding
TRINITY_DN86302_c1_g1_i2	RecName: Full=Protein SULFUR DEFICIENCY-INDUCED 2	297	5	3.86688e-128	76.02	10	P:GO:0006792; P:GO:0007140; P:GO:0009556; P:GO:0009658; P:GO:0010438; P:GO:0010439; P:GO:0051301; F:GO:0005515; C:GO:0005634; C:GO:0017053	P:regulation of sulfur utilization; P:male meiotic nuclear division; P:microsporogenesis; P:chloroplast organization; P:cellular response to sulfur starvation; P:regulation of glucosinolate biosynthetic process; P:cell division; F:protein binding; C:nucleus; C:transcription repressor complex			Coil (COILS); Coil (COILS); IPR019734 (SMART); IPR011990 (G3DSA:1.25.40.GENE3D); IPR019734 (PFAM); mobidb-lite (MOBIDB_LITE); PTHR36326:SF14 (PANTHER); PTHR36326 (PANTHER); IPR019734 (PROSITE_PROFILES); IPR013026 (PROSITE_PROFILES); IPR011990 (SUPERFAMILY)	F:GO:0005515	F:protein binding
TRINITY_DN86302_c1_g1_i4	RecName: Full=Protein SULFUR DEFICIENCY-INDUCED 1; Short=AtSDI1	300	5	3.05145e-134	76.27	10	P:GO:0006792; P:GO:0007140; P:GO:0009556; P:GO:0009658; P:GO:0010438; P:GO:0010439; P:GO:0051301; F:GO:0005515; C:GO:0005634; C:GO:0017053	P:regulation of sulfur utilization; P:male meiotic nuclear division; P:microsporogenesis; P:chloroplast organization; P:cellular response to sulfur starvation; P:regulation of glucosinolate biosynthetic process; P:cell division; F:protein binding; C:nucleus; C:transcription repressor complex			Coil (COILS); IPR019734 (SMART); IPR011990 (G3DSA:1.25.40.GENE3D); IPR019734 (PFAM); mobidb-lite (MOBIDB_LITE); PTHR36326 (PANTHER); PTHR36326:SF14 (PANTHER); IPR013026 (PROSITE_PROFILES); IPR019734 (PROSITE_PROFILES); IPR011990 (SUPERFAMILY)	F:GO:0005515	F:protein binding
TRINITY_DN82661_c0_g1_i2	RecName: Full=Homeobox-leucine zipper protein HOX4; AltName: Full=HD-ZIP protein HOX4; AltName: Full=Homeodomain transcription factor HOX4; AltName: Full=OsHox4	154	20	2.7032e-51	77.04	20	P:GO:0006357; P:GO:0009414; P:GO:0009637; P:GO:0009651; P:GO:0009733; P:GO:0009739; P:GO:0009744; P:GO:0009788; P:GO:0010311; P:GO:0017148; P:GO:0030308; P:GO:0045893; P:GO:0048510; P:GO:0048573; P:GO:0048826; P:GO:0080022; F:GO:0000976; F:GO:0000981; F:GO:0042803; C:GO:0005634	P:regulation of transcription by RNA polymerase II; P:response to water deprivation; P:response to blue light; P:response to salt stress; P:response to auxin; P:response to gibberellin; P:response to sucrose; P:negative regulation of abscisic acid-activated signaling pathway; P:lateral root formation; P:negative regulation of translation; P:negative regulation of cell growth; P:positive regulatio…			Coil (COILS); IPR000047 (PRINTS); IPR001356 (SMART); IPR001356 (PFAM); G3DSA:1.10.10.60 (GENE3D); IPR003106 (PFAM); mobidb-lite (MOBIDB_LITE); PTHR24326:SF589 (PANTHER); PTHR24326 (PANTHER); IPR017970 (PROSITE_PATTERNS); NON_CYTOPLASMIC_DOMAIN (PHOBIUS); SIGNAL_PEPTIDE_C_REGION (PHOBIUS); SIGNAL_PEPTIDE (PHOBIUS); SIGNAL_PEPTIDE_H_REGION (PHOBIUS); SIGNAL_PEPTIDE_N_REGION (PHOBIUS); IPR001356 (PR…	P:GO:0006355; F:GO:0000981; F:GO:0003677; F:GO:0043565	P:regulation of transcription, DNA-templated; F:DNA-binding transcription factor activity, RNA polymerase II-specific; F:DNA binding; F:sequence-specific DNA binding
TRINITY_DN82661_c0_g1_i1	RecName: Full=Homeobox-leucine zipper protein HOX4; AltName: Full=HD-ZIP protein HOX4; AltName: Full=Homeodomain transcription factor HOX4; AltName: Full=OsHox4	113	20	2.31431e-48	79.63	20	P:GO:0006357; P:GO:0009414; P:GO:0009637; P:GO:0009651; P:GO:0009733; P:GO:0009739; P:GO:0009744; P:GO:0009788; P:GO:0010311; P:GO:0017148; P:GO:0030308; P:GO:0045893; P:GO:0048510; P:GO:0048573; P:GO:0048826; P:GO:0080022; F:GO:0000976; F:GO:0000981; F:GO:0042803; C:GO:0005634	P:regulation of transcription by RNA polymerase II; P:response to water deprivation; P:response to blue light; P:response to salt stress; P:response to auxin; P:response to gibberellin; P:response to sucrose; P:negative regulation of abscisic acid-activated signaling pathway; P:lateral root formation; P:negative regulation of translation; P:negative regulation of cell growth; P:positive regulatio…			Coil (COILS); IPR000047 (PRINTS); IPR001356 (SMART); IPR003106 (PFAM); G3DSA:1.10.10.60 (GENE3D); IPR001356 (PFAM); PTHR24326:SF547 (PANTHER); PTHR24326 (PANTHER); IPR017970 (PROSITE_PATTERNS); IPR001356 (PROSITE_PROFILES); IPR001356 (CDD); IPR009057 (SUPERFAMILY)	P:GO:0006355; F:GO:0000981; F:GO:0003677; F:GO:0043565	P:regulation of transcription, DNA-templated; F:DNA-binding transcription factor activity, RNA polymerase II-specific; F:DNA binding; F:sequence-specific DNA binding
TRINITY_DN80534_c2_g1_i1	RecName: Full=WRKY transcription factor WRKY24; Short=OsWRKY24	96	20	4.92913e-23	76.68	36	P:GO:0009409; P:GO:0009414; P:GO:0009555; P:GO:0009611; P:GO:0009624; P:GO:0009627; P:GO:0009723; P:GO:0009733; P:GO:0009753; P:GO:0009788; P:GO:0009846; P:GO:0009863; P:GO:0009938; P:GO:0009942; P:GO:0009957; P:GO:0009961; P:GO:0010120; P:GO:0010200; P:GO:0010214; P:GO:0010228; P:GO:0010508; P:GO:0030010; P:GO:0042659; P:GO:0045893; P:GO:0051607; P:GO:0070301; P:GO:0070370; P:GO:1900150; P:GO:19…	P:response to cold; P:response to water deprivation; P:pollen development; P:response to wounding; P:response to nematode; P:systemic acquired resistance; P:response to ethylene; P:response to auxin; P:response to jasmonic acid; P:negative regulation of abscisic acid-activated signaling pathway; P:pollen germination; P:salicylic acid mediated signaling pathway; P:negative regulation of gibberelli…			IPR003657 (SMART); IPR036576 (G3DSA:2.20.25.GENE3D); IPR003657 (PFAM); mobidb-lite (MOBIDB_LITE); mobidb-lite (MOBIDB_LITE); PTHR31221 (PANTHER); PTHR31221:SF180 (PANTHER); IPR003657 (PROSITE_PROFILES); IPR036576 (SUPERFAMILY)	P:GO:0006355; F:GO:0003700; F:GO:0043565	P:regulation of transcription, DNA-templated; F:DNA-binding transcription factor activity; F:sequence-specific DNA binding
TRINITY_DN97044_c0_g1_i1	RecName: Full=Sucrose synthase; AltName: Full=Sucrose-UDP glucosyltransferase	81	20	3.49333e-43	88.99	12	P:GO:0001666; P:GO:0005985; P:GO:0006970; P:GO:0009877; P:GO:0010037; P:GO:0010431; P:GO:0034059; P:GO:0051262; F:GO:0016157; C:GO:0005773; C:GO:0005829; C:GO:0005886	P:response to hypoxia; P:sucrose metabolic process; P:response to osmotic stress; P:nodulation; P:response to carbon dioxide; P:seed maturation; P:response to anoxia; P:protein tetramerization; F:sucrose synthase activity; C:vacuole; C:cytosol; C:plasma membrane	EC:2.4.1.13	Sucrose synthase	G3DSA:3.40.50.2000 (GENE3D); PTHR45839 (PANTHER); PTHR45839:SF12 (PANTHER); cd03800 (CDD)	no GO terms	no GO terms
TRINITY_DN77666_c0_g1_i6	RecName: Full=Probable serine/threonine-protein kinase CST; AltName: Full=Protein CAST AWAY	123	20	2.11622e-31	72.87	16	P:GO:0002237; P:GO:0018108; P:GO:0045087; P:GO:0050777; P:GO:0060862; P:GO:1900426; P:GO:1902458; F:GO:0004674; F:GO:0004713; F:GO:0005524; F:GO:0030957; C:GO:0005634; C:GO:0005886; C:GO:0009506; C:GO:0009507; C:GO:0016021	P:response to molecule of bacterial origin; P:peptidyl-tyrosine phosphorylation; P:innate immune response; P:negative regulation of immune response; P:negative regulation of floral organ abscission; P:positive regulation of defense response to bacterium; P:positive regulation of stomatal opening; F:protein serine/threonine kinase activity; F:protein tyrosine kinase activity; F:ATP binding; F:Tat …	EC:2.7.10; EC:2.7.11	Transferring phosphorus-containing groups; Transferring phosphorus-containing groups	IPR001245 (PFAM); G3DSA:1.10.510.10 (GENE3D); PTHR45621 (PANTHER); PTHR45621:SF75 (PANTHER); IPR008271 (PROSITE_PATTERNS); IPR000719 (PROSITE_PROFILES); IPR011009 (SUPERFAMILY)	P:GO:0006468; F:GO:0004672; F:GO:0005524	P:protein phosphorylation; F:protein kinase activity; F:ATP binding
TRINITY_DN70979_c0_g2_i3	RecName: Full=WRKY transcription factor WRKY71; Short=OsWRKY71	98	20	2.73474e-35	79.46	26	P:GO:0002237; P:GO:0002238; P:GO:0009409; P:GO:0009414; P:GO:0009611; P:GO:0009651; P:GO:0009685; P:GO:0009737; P:GO:0009751; P:GO:0009753; P:GO:0009873; P:GO:0009938; P:GO:0010200; P:GO:0010228; P:GO:0016036; P:GO:0045892; P:GO:0045893; P:GO:0080169; P:GO:1900425; P:GO:1905034; F:GO:0000976; F:GO:0003700; F:GO:0005524; F:GO:0042802; F:GO:1990841; C:GO:0005634	P:response to molecule of bacterial origin; P:response to molecule of fungal origin; P:response to cold; P:response to water deprivation; P:response to wounding; P:response to salt stress; P:gibberellin metabolic process; P:response to abscisic acid; P:response to salicylic acid; P:response to jasmonic acid; P:ethylene-activated signaling pathway; P:negative regulation of gibberellic acid mediate…			IPR003657 (SMART); IPR036576 (G3DSA:2.20.25.GENE3D); IPR003657 (PFAM); mobidb-lite (MOBIDB_LITE); PTHR31429:SF3 (PANTHER); PTHR31429 (PANTHER); IPR003657 (PROSITE_PROFILES); IPR036576 (SUPERFAMILY)	P:GO:0006355; F:GO:0003700; F:GO:0043565	P:regulation of transcription, DNA-templated; F:DNA-binding transcription factor activity; F:sequence-specific DNA binding
TRINITY_DN143799_c0_g1_i1	RecName: Full=WRKY transcription factor WRKY28; Short=OsWRKY28	142	4	1.381e-15	56.96	12	P:GO:0002237; P:GO:0009611; P:GO:0009751; P:GO:0010200; P:GO:0031347; P:GO:0042742; P:GO:0045892; P:GO:0050832; F:GO:0000976; F:GO:0003700; F:GO:0042802; C:GO:0005634	P:response to molecule of bacterial origin; P:response to wounding; P:response to salicylic acid; P:response to chitin; P:regulation of defense response; P:defense response to bacterium; P:negative regulation of transcription, DNA-templated; P:defense response to fungus; F:transcription regulatory region sequence-specific DNA binding; F:DNA-binding transcription factor activity; F:identical prote…			Coil (COILS); mobidb-lite (MOBIDB_LITE); mobidb-lite (MOBIDB_LITE); PTHR31429:SF71 (PANTHER); PTHR31429 (PANTHER)	no GO terms	no GO terms
TRINITY_DN88082_c1_g3_i1	RecName: Full=Light-inducible protein CPRF2; AltName: Full=Common plant regulatory factor 2; Short=CPRF-2	236	5	4.22259e-46	46.51	16	P:GO:0002240; P:GO:0009267; P:GO:0009626; P:GO:0009649; P:GO:0045893; P:GO:0071215; P:GO:0071333; P:GO:2000693; F:GO:0000976; F:GO:0003700; F:GO:0019900; F:GO:0042802; F:GO:0043621; F:GO:0046982; C:GO:0005634; C:GO:0005737	P:response to molecule of oomycetes origin; P:cellular response to starvation; P:plant-type hypersensitive response; P:entrainment of circadian clock; P:positive regulation of transcription, DNA-templated; P:cellular response to abscisic acid stimulus; P:cellular response to glucose stimulus; P:positive regulation of seed maturation; F:transcription regulatory region sequence-specific DNA binding…			mobidb-lite (MOBIDB_LITE); mobidb-lite (MOBIDB_LITE); mobidb-lite (MOBIDB_LITE); mobidb-lite (MOBIDB_LITE); mobidb-lite (MOBIDB_LITE); PTHR46408 (PANTHER); PTHR46408:SF10 (PANTHER)	no GO terms	no GO terms
TRINITY_DN66222_c0_g1_i1	RecName: Full=Protein DETOXIFICATION 49; Short=AtDTX49; AltName: Full=Multidrug and toxic compound extrusion protein 49; Short=MATE protein 49; AltName: Full=Protein NOVEL ION CARRIER 1; Short=Protein NIC1	228	20	1.0299e-94	61.02	31	P:GO:0006970; P:GO:0009408; P:GO:0009611; P:GO:0009646; P:GO:0009737; P:GO:0010015; P:GO:0010150; P:GO:0010252; P:GO:0031348; P:GO:0034755; P:GO:0042908; P:GO:0046620; P:GO:0055072; P:GO:0071244; P:GO:0080168; P:GO:1902456; P:GO:1905428; P:GO:2000070; F:GO:0005381; F:GO:0005515; F:GO:0015297; F:GO:0042910; F:GO:0090440; C:GO:0000139; C:GO:0005774; C:GO:0005778; C:GO:0005886; C:GO:0009507; C:GO:00…	P:response to osmotic stress; P:response to heat; P:response to wounding; P:response to absence of light; P:response to abscisic acid; P:root morphogenesis; P:leaf senescence; P:auxin homeostasis; P:negative regulation of defense response; P:iron ion transmembrane transport; P:xenobiotic transport; P:regulation of organ growth; P:iron ion homeostasis; P:cellular response to carbon dioxide; P:absc…			IPR002528 (PFAM); PTHR11206:SF387 (PANTHER); PTHR11206 (PANTHER); SIGNAL_PEPTIDE_H_REGION (PHOBIUS); NON_CYTOPLASMIC_DOMAIN (PHOBIUS); CYTOPLASMIC_DOMAIN (PHOBIUS); CYTOPLASMIC_DOMAIN (PHOBIUS); NON_CYTOPLASMIC_DOMAIN (PHOBIUS); SIGNAL_PEPTIDE_N_REGION (PHOBIUS); SIGNAL_PEPTIDE (PHOBIUS); SIGNAL_PEPTIDE_C_REGION (PHOBIUS); TRANSMEMBRANE (PHOBIUS); TRANSMEMBRANE (PHOBIUS); TRANSMEMBRANE (PHOBIUS);…	P:GO:0055085; F:GO:0015297; F:GO:0042910; C:GO:0016020	P:transmembrane transport; F:antiporter activity; F:xenobiotic transmembrane transporter activity; C:membrane
TRINITY_DN91512_c4_g2_i1	RecName: Full=Phospholipase D alpha 1; Short=PLD alpha 1; AltName: Full=Choline phosphatase 1; AltName: Full=Phosphatidylcholine-hydrolyzing phospholipase D 1	633	20	0	66.57	26	P:GO:0006979; P:GO:0009409; P:GO:0009414; P:GO:0009651; P:GO:0009789; P:GO:0009793; P:GO:0009816; P:GO:0010044; P:GO:0012501; P:GO:0034638; P:GO:0046466; P:GO:0046473; P:GO:0046686; P:GO:0090333; F:GO:0004630; F:GO:0005509; F:GO:0005515; F:GO:0005546; F:GO:0070290; C:GO:0005773; C:GO:0005783; C:GO:0005886; C:GO:0009506; C:GO:0009941; C:GO:0022626; C:GO:0090395	P:response to oxidative stress; P:response to cold; P:response to water deprivation; P:response to salt stress; P:positive regulation of abscisic acid-activated signaling pathway; P:embryo development ending in seed dormancy; P:defense response to bacterium, incompatible interaction; P:response to aluminum ion; P:programmed cell death; P:phosphatidylcholine catabolic process; P:membrane lipid cat…	EC:3.1.4.4	Phospholipase D	IPR000008 (SMART); IPR000008 (PFAM); G3DSA:3.30.870.10 (GENE3D); IPR001736 (PFAM); IPR035892 (G3DSA:2.60.40.GENE3D); G3DSA:3.30.870.10 (GENE3D); PTHR18896:SF130 (PANTHER); IPR015679 (PANTHER); IPR001736 (PROSITE_PROFILES); IPR000008 (PROSITE_PROFILES); cd04015 (CDD); SSF56024 (SUPERFAMILY); SSF49562 (SUPERFAMILY); SSF56024 (SUPERFAMILY)	F:GO:0003824	F:catalytic activity
TRINITY_DN89044_c0_g2_i2	RecName: Full=Phospholipase D alpha 1; Short=PLD alpha 1; AltName: Full=Choline phosphatase 1; AltName: Full=Phosphatidylcholine-hydrolyzing phospholipase D 1	279	20	1.63584e-151	72.63	26	P:GO:0006979; P:GO:0009409; P:GO:0009414; P:GO:0009651; P:GO:0009789; P:GO:0009793; P:GO:0009816; P:GO:0010044; P:GO:0012501; P:GO:0034638; P:GO:0046466; P:GO:0046473; P:GO:0046686; P:GO:0090333; F:GO:0004630; F:GO:0005509; F:GO:0005515; F:GO:0005546; F:GO:0070290; C:GO:0005773; C:GO:0005783; C:GO:0005886; C:GO:0009506; C:GO:0009941; C:GO:0022626; C:GO:0090395	P:response to oxidative stress; P:response to cold; P:response to water deprivation; P:response to salt stress; P:positive regulation of abscisic acid-activated signaling pathway; P:embryo development ending in seed dormancy; P:defense response to bacterium, incompatible interaction; P:response to aluminum ion; P:programmed cell death; P:phosphatidylcholine catabolic process; P:membrane lipid cat…	EC:3.1.4.4	Phospholipase D	IPR001736 (SMART); IPR025202 (PFAM); G3DSA:3.30.870.10 (GENE3D); IPR024632 (PFAM); PTHR18896:SF130 (PANTHER); IPR015679 (PANTHER); IPR001736 (PROSITE_PROFILES); SSF56024 (SUPERFAMILY)	F:GO:0003824	F:catalytic activity
TRINITY_DN72820_c0_g1_i1	RecName: Full=Receptor-like protein kinase 7; Flags: Precursor	93	20	3.60567e-16	61.07	44	P:GO:0006979; P:GO:0007178; P:GO:0009738; P:GO:0009816; P:GO:0009826; P:GO:0009845; P:GO:0009934; P:GO:0009960; P:GO:0010067; P:GO:0010082; P:GO:0010089; P:GO:0010102; P:GO:0010183; P:GO:0010223; P:GO:0010227; P:GO:0010468; P:GO:0016032; P:GO:0018108; P:GO:0030154; P:GO:0031347; P:GO:0034613; P:GO:0045490; P:GO:0045851; P:GO:0046777; P:GO:0048229; P:GO:0050829; P:GO:0051301; P:GO:0060320; P:GO:00…	P:response to oxidative stress; P:transmembrane receptor protein serine/threonine kinase signaling pathway; P:abscisic acid-activated signaling pathway; P:defense response to bacterium, incompatible interaction; P:unidimensional cell growth; P:seed germination; P:regulation of meristem structural organization; P:endosperm development; P:procambium histogenesis; P:regulation of root meristem growt…	EC:2.7.10; EC:2.7.10.1; EC:2.7.11; EC:2.7.11.30	Transferring phosphorus-containing groups; Receptor protein-tyrosine kinase; Transferring phosphorus-containing groups; Receptor protein serine/threonine kinase	IPR001245 (PFAM); G3DSA:1.10.510.10 (GENE3D); PTHR48054 (PANTHER); PTHR48054:SF25 (PANTHER); IPR000719 (PROSITE_PROFILES); IPR011009 (SUPERFAMILY)	P:GO:0006468; F:GO:0004672; F:GO:0005524	P:protein phosphorylation; F:protein kinase activity; F:ATP binding
TRINITY_DN61085_c0_g3_i1	RecName: Full=Probable WRKY transcription factor 70; AltName: Full=WRKY DNA-binding protein 70	149	2	4.28697e-07	55.15	21	P:GO:0000302; P:GO:0002229; P:GO:0009625; P:GO:0009862; P:GO:0009864; P:GO:0010104; P:GO:0010200; P:GO:0045892; P:GO:0047484; P:GO:0050832; P:GO:0080151; P:GO:0080187; P:GO:0090333; P:GO:1900056; P:GO:1900457; P:GO:2000022; P:GO:2000070; F:GO:0000976; F:GO:0003700; F:GO:0005515; C:GO:0005634	P:response to reactive oxygen species; P:defense response to oomycetes; P:response to insect; P:systemic acquired resistance, salicylic acid mediated signaling pathway; P:induced systemic resistance, jasmonic acid mediated signaling pathway; P:regulation of ethylene-activated signaling pathway; P:response to chitin; P:negative regulation of transcription, DNA-templated; P:regulation of response t…			mobidb-lite (MOBIDB_LITE); mobidb-lite (MOBIDB_LITE); PTHR31282 (PANTHER); PTHR31282:SF110 (PANTHER)	no GO terms	no GO terms
TRINITY_DN90702_c0_g1_i3	RecName: Full=IQ domain-containing protein IQM3; AltName: Full=IQ motif-containing protein 3	243	6	1.10012e-69	77.89	6	P:GO:0009651; P:GO:0009737; P:GO:0010119; F:GO:0005516; C:GO:0005634; C:GO:0009507	P:response to salt stress; P:response to abscisic acid; P:regulation of stomatal movement; F:calmodulin binding; C:nucleus; C:chloroplast			PTHR31250:SF43 (PANTHER); PTHR31250 (PANTHER); SIGNAL_PEPTIDE_C_REGION (PHOBIUS); NON_CYTOPLASMIC_DOMAIN (PHOBIUS); SIGNAL_PEPTIDE (PHOBIUS); SIGNAL_PEPTIDE_H_REGION (PHOBIUS); SIGNAL_PEPTIDE_N_REGION (PHOBIUS)	no GO terms	no GO terms
TRINITY_DN71515_c0_g3_i1	RecName: Full=Peptide methionine sulfoxide reductase MsrB; AltName: Full=Peptide-methionine (R)-S-oxide reductase	133	20	5.25986e-78	74.34	13	P:GO:0000304; P:GO:0009631; P:GO:0030091; P:GO:0034599; P:GO:0055114; F:GO:0008270; F:GO:0033743; F:GO:0070191; C:GO:0005634; C:GO:0005739; C:GO:0005783; C:GO:0005829; C:GO:0009570	P:response to singlet oxygen; P:cold acclimation; P:protein repair; P:cellular response to oxidative stress; P:oxidation-reduction process; F:zinc ion binding; F:peptide-methionine (R)-S-oxide reductase activity; F:methionine-R-sulfoxide reductase activity; C:nucleus; C:mitochondrion; C:endoplasmic reticulum; C:cytosol; C:chloroplast stroma	EC:1.8.4.12	Peptide-methionine (R)-S-oxide reductase	IPR002579 (PFAM); G3DSA:2.170.150.20 (GENE3D); IPR002579 (TIGRFAM); PTHR46081:SF4 (PANTHER); IPR028427 (PANTHER); IPR002579 (PROSITE_PROFILES); IPR011057 (SUPERFAMILY)	P:GO:0006979; P:GO:0030091; P:GO:0055114; F:GO:0016671; F:GO:0033743	P:response to oxidative stress; P:protein repair; P:oxidation-reduction process; F:oxidoreductase activity, acting on a sulfur group of donors, disulfide as acceptor; F:peptide-methionine (R)-S-oxide reductase activity
TRINITY_DN143481_c0_g1_i1	RecName: Full=Laccase-2; AltName: Full=Benzenediol:oxygen oxidoreductase 2; AltName: Full=Diphenol oxidase 2; AltName: Full=Urishiol oxidase 2; Flags: Precursor	73	20	2.52957e-42	85.49	8	P:GO:0009414; P:GO:0009809; P:GO:0009834; P:GO:0046274; P:GO:0055114; F:GO:0005507; F:GO:0052716; C:GO:0048046	P:response to water deprivation; P:lignin biosynthetic process; P:plant-type secondary cell wall biogenesis; P:lignin catabolic process; P:oxidation-reduction process; F:copper ion binding; F:hydroquinone:oxygen oxidoreductase activity; C:apoplast	EC:1.10.3; EC:1.10.3.2	Acting on diphenols and related substances as donors; Laccase	IPR008972 (G3DSA:2.60.40.GENE3D); IPR011706 (PFAM); PTHR11709 (PANTHER); PTHR11709:SF406 (PANTHER); IPR033138 (PROSITE_PATTERNS); IPR002355 (PROSITE_PATTERNS); IPR008972 (SUPERFAMILY)	P:GO:0055114; F:GO:0005507; F:GO:0016491	P:oxidation-reduction process; F:copper ion binding; F:oxidoreductase activity
TRINITY_DN7299_c0_g1_i1	RecName: Full=Laccase-10; AltName: Full=Benzenediol:oxygen oxidoreductase 10; AltName: Full=Diphenol oxidase 10; AltName: Full=Urishiol oxidase 10; Flags: Precursor	58	20	3.85989e-29	81.29	8	P:GO:0009414; P:GO:0009809; P:GO:0009834; P:GO:0046274; P:GO:0055114; F:GO:0005507; F:GO:0052716; C:GO:0048046	P:response to water deprivation; P:lignin biosynthetic process; P:plant-type secondary cell wall biogenesis; P:lignin catabolic process; P:oxidation-reduction process; F:copper ion binding; F:hydroquinone:oxygen oxidoreductase activity; C:apoplast	EC:1.10.3; EC:1.10.3.2	Acting on diphenols and related substances as donors; Laccase	IPR011706 (PFAM); IPR008972 (G3DSA:2.60.40.GENE3D); PTHR11709 (PANTHER); PTHR11709:SF342 (PANTHER); IPR002355 (PROSITE_PATTERNS); IPR033138 (PROSITE_PATTERNS); IPR008972 (SUPERFAMILY)	P:GO:0055114; F:GO:0005507; F:GO:0016491	P:oxidation-reduction process; F:copper ion binding; F:oxidoreductase activity
TRINITY_DN89212_c2_g1_i2	RecName: Full=Laccase-12; AltName: Full=Benzenediol:oxygen oxidoreductase 12; AltName: Full=Diphenol oxidase 12; AltName: Full=Urishiol oxidase 12; Flags: Precursor	582	20	0	72.38	9	P:GO:0009414; P:GO:0009809; P:GO:0009834; P:GO:0046274; P:GO:0046688; P:GO:0055114; F:GO:0005507; F:GO:0052716; C:GO:0048046	P:response to water deprivation; P:lignin biosynthetic process; P:plant-type secondary cell wall biogenesis; P:lignin catabolic process; P:response to copper ion; P:oxidation-reduction process; F:copper ion binding; F:hydroquinone:oxygen oxidoreductase activity; C:apoplast	EC:1.10.3; EC:1.10.3.2	Acting on diphenols and related substances as donors; Laccase	IPR001117 (PFAM); IPR017761 (TIGRFAM); IPR008972 (G3DSA:2.60.40.GENE3D); IPR008972 (G3DSA:2.60.40.GENE3D); IPR011706 (PFAM); IPR008972 (G3DSA:2.60.40.GENE3D); IPR011707 (PFAM); PTHR11709 (PANTHER); PTHR11709:SF355 (PANTHER); IPR033138 (PROSITE_PATTERNS); IPR002355 (PROSITE_PATTERNS); SIGNAL_PEPTIDE_H_REGION (PHOBIUS); SIGNAL_PEPTIDE_C_REGION (PHOBIUS); SIGNAL_PEPTIDE_N_REGION (PHOBIUS); NON_CYTOP…	P:GO:0046274; P:GO:0055114; F:GO:0005507; F:GO:0016491; F:GO:0052716; C:GO:0048046	P:lignin catabolic process; P:oxidation-reduction process; F:copper ion binding; F:oxidoreductase activity; F:hydroquinone:oxygen oxidoreductase activity; C:apoplast
TRINITY_DN89815_c1_g3_i1	RecName: Full=Hexose carrier protein HEX6	350	20	0	76.08	21	P:GO:0009414; P:GO:0009651; P:GO:0009737; P:GO:0015757; P:GO:0015761; P:GO:0015770; P:GO:0042882; P:GO:0071333; P:GO:1904659; F:GO:0005354; F:GO:0005358; F:GO:0008506; F:GO:0015578; F:GO:0042900; F:GO:0055055; C:GO:0005634; C:GO:0005773; C:GO:0005887; C:GO:0009506; C:GO:0012505; C:GO:0090406	P:response to water deprivation; P:response to salt stress; P:response to abscisic acid; P:galactose transmembrane transport; P:mannose transmembrane transport; P:sucrose transport; P:L-arabinose transmembrane transport; P:cellular response to glucose stimulus; P:glucose transmembrane transport; F:galactose transmembrane transporter activity; F:high-affinity glucose:proton symporter activity; F:s…			IPR005828 (PFAM); IPR003663 (TIGRFAM); G3DSA:1.20.1250.20 (GENE3D); PTHR23500 (PANTHER); PTHR23500:SF421 (PANTHER); IPR005829 (PROSITE_PATTERNS); TRANSMEMBRANE (PHOBIUS); CYTOPLASMIC_DOMAIN (PHOBIUS); CYTOPLASMIC_DOMAIN (PHOBIUS); TRANSMEMBRANE (PHOBIUS); NON_CYTOPLASMIC_DOMAIN (PHOBIUS); CYTOPLASMIC_DOMAIN (PHOBIUS); TRANSMEMBRANE (PHOBIUS); TRANSMEMBRANE (PHOBIUS); NON_CYTOPLASMIC_DOMAIN (PHOBI…	P:GO:0055085; F:GO:0022857; C:GO:0016020; C:GO:0016021	P:transmembrane transport; F:transmembrane transporter activity; C:membrane; C:integral component of membrane
TRINITY_DN54842_c0_g2_i1	RecName: Full=Protein NRT1/ PTR FAMILY 3.1; Short=AtNPF3.1	454	20	0	61.72	40	P:GO:0009414; P:GO:0009611; P:GO:0009635; P:GO:0009734; P:GO:0009737; P:GO:0009751; P:GO:0009753; P:GO:0009793; P:GO:0009860; P:GO:0010098; P:GO:0010167; P:GO:0010336; P:GO:0010540; P:GO:0015031; P:GO:0035672; P:GO:0042128; P:GO:0042538; P:GO:0042742; P:GO:0042938; P:GO:0042939; P:GO:0043201; P:GO:0043562; P:GO:0048527; P:GO:0048573; P:GO:0080052; P:GO:0080053; P:GO:0080167; P:GO:0090408; P:GO:00…	P:response to water deprivation; P:response to wounding; P:response to herbicide; P:auxin-activated signaling pathway; P:response to abscisic acid; P:response to salicylic acid; P:response to jasmonic acid; P:embryo development ending in seed dormancy; P:pollen tube growth; P:suspensor development; P:response to nitrate; P:gibberellic acid homeostasis; P:basipetal auxin transport; P:protein trans…			IPR000109 (PFAM); G3DSA:1.20.1250.20 (GENE3D); IPR000109 (PANTHER); PTHR11654:SF461 (PANTHER); CYTOPLASMIC_DOMAIN (PHOBIUS); NON_CYTOPLASMIC_DOMAIN (PHOBIUS); NON_CYTOPLASMIC_DOMAIN (PHOBIUS); NON_CYTOPLASMIC_DOMAIN (PHOBIUS); TRANSMEMBRANE (PHOBIUS); CYTOPLASMIC_DOMAIN (PHOBIUS); TRANSMEMBRANE (PHOBIUS); CYTOPLASMIC_DOMAIN (PHOBIUS); TRANSMEMBRANE (PHOBIUS); TRANSMEMBRANE (PHOBIUS); TRANSMEMBRAN…	P:GO:0055085; F:GO:0022857; C:GO:0016020	P:transmembrane transport; F:transmembrane transporter activity; C:membrane
TRINITY_DN75869_c0_g2_i1	RecName: Full=Probable GTP diphosphokinase RSH3, chloroplastic; AltName: Full=RelA/SpoT homolog 3; Short=AtRSH3; AltName: Full=ppGpp synthetase RSH3; Flags: Precursor	120	6	2.56898e-42	77.75	11	P:GO:0009611; P:GO:0009737; P:GO:0010150; P:GO:0015970; P:GO:0015979; P:GO:0016310; F:GO:0005524; F:GO:0005525; F:GO:0008728; F:GO:0016301; C:GO:0009507	P:response to wounding; P:response to abscisic acid; P:leaf senescence; P:guanosine tetraphosphate biosynthetic process; P:photosynthesis; P:phosphorylation; F:ATP binding; F:GTP binding; F:GTP diphosphokinase activity; F:kinase activity; C:chloroplast	EC:2.7.6.5	GTP diphosphokinase	PTHR21262 (PANTHER); PTHR21262:SF35 (PANTHER); NON_CYTOPLASMIC_DOMAIN (PHOBIUS); SIGNAL_PEPTIDE_H_REGION (PHOBIUS); SIGNAL_PEPTIDE_C_REGION (PHOBIUS); SIGNAL_PEPTIDE_N_REGION (PHOBIUS); SIGNAL_PEPTIDE (PHOBIUS); SignalP-noTM (SIGNALP_EUK); SignalP-TM (SIGNALP_GRAM_POSITIVE)	no GO terms	no GO terms
TRINITY_DN79069_c2_g3_i1	RecName: Full=Protein TIFY 5A; AltName: Full=Jasmonate ZIM domain-containing protein 8	131	13	8.78789e-21	53.33	8	P:GO:0009611; P:GO:0009733; P:GO:0009751; P:GO:0010112; P:GO:0010200; P:GO:2000022; F:GO:0042803; C:GO:0005634	P:response to wounding; P:response to auxin; P:response to salicylic acid; P:regulation of systemic acquired resistance; P:response to chitin; P:regulation of jasmonic acid mediated signaling pathway; F:protein homodimerization activity; C:nucleus			IPR010399 (SMART); IPR010399 (PFAM); IPR018467 (PFAM); mobidb-lite (MOBIDB_LITE); PTHR33077:SF99 (PANTHER); IPR040390 (PANTHER); IPR010399 (PROSITE_PROFILES)	no GO terms	no GO terms
TRINITY_DN89419_c2_g1_i1	RecName: Full=Probable serine/threonine-protein kinase At1g01540	279	20	5.52969e-133	67.18	19	P:GO:0009611; P:GO:0009620; P:GO:0009742; P:GO:0009826; P:GO:0031347; P:GO:0045851; P:GO:0046777; F:GO:0000976; F:GO:0001653; F:GO:0004674; F:GO:0004888; F:GO:0005524; F:GO:0019901; F:GO:0042802; C:GO:0005886; C:GO:0009506; C:GO:0009507; C:GO:0009514; C:GO:0016021	P:response to wounding; P:response to fungus; P:brassinosteroid mediated signaling pathway; P:unidimensional cell growth; P:regulation of defense response; P:pH reduction; P:protein autophosphorylation; F:transcription regulatory region sequence-specific DNA binding; F:peptide receptor activity; F:protein serine/threonine kinase activity; F:transmembrane signaling receptor activity; F:ATP binding…	EC:2.7.11	Transferring phosphorus-containing groups	IPR020635 (SMART); IPR001245 (PFAM); G3DSA:3.30.200.20 (GENE3D); PTHR47984 (PANTHER); PTHR47984:SF29 (PANTHER); IPR017441 (PROSITE_PATTERNS); CYTOPLASMIC_DOMAIN (PHOBIUS); NON_CYTOPLASMIC_DOMAIN (PHOBIUS); TRANSMEMBRANE (PHOBIUS); IPR000719 (PROSITE_PROFILES); IPR011009 (SUPERFAMILY); TMhelix (TMHMM)	P:GO:0006468; F:GO:0004672; F:GO:0004713; F:GO:0005524	P:protein phosphorylation; F:protein kinase activity; F:protein tyrosine kinase activity; F:ATP binding
TRINITY_DN78516_c0_g1_i2	RecName: Full=Putative pentatricopeptide repeat-containing protein At5g65820	494	20	0	54.5	6	P:GO:0008380; P:GO:0009793; P:GO:0032543; F:GO:0008270; C:GO:0005739; C:GO:0009507	P:RNA splicing; P:embryo development ending in seed dormancy; P:mitochondrial translation; F:zinc ion binding; C:mitochondrion; C:chloroplast			Coil (COILS); IPR011990 (G3DSA:1.25.40.GENE3D); IPR011990 (G3DSA:1.25.40.GENE3D); IPR011990 (G3DSA:1.25.40.GENE3D); IPR002885 (TIGRFAM); IPR002885 (PFAM); IPR002885 (PFAM); IPR011990 (G3DSA:1.25.40.GENE3D); IPR002885 (PFAM); IPR002885 (PFAM); mobidb-lite (MOBIDB_LITE); mobidb-lite (MOBIDB_LITE); PTHR47933 (PANTHER); PTHR47933:SF9 (PANTHER); SIGNAL_PEPTIDE_C_REGION (PHOBIUS); NON_CYTOPLASMIC_DOMAI…	F:GO:0005515	F:protein binding
TRINITY_DN89965_c0_g3_i11	RecName: Full=Pentatricopeptide repeat-containing protein At4g25270, chloroplastic; Flags: Precursor	523	20	0	57.99	14	P:GO:0008380; P:GO:0010087; P:GO:0010305; P:GO:0010588; P:GO:0016554; P:GO:0031425; P:GO:0031426; P:GO:0080156; P:GO:1900865; F:GO:0003723; F:GO:0005515; F:GO:0008270; C:GO:0005739; C:GO:0009507	P:RNA splicing; P:phloem or xylem histogenesis; P:leaf vascular tissue pattern formation; P:cotyledon vascular tissue pattern formation; P:cytidine to uridine editing; P:chloroplast RNA processing; P:polycistronic mRNA processing; P:mitochondrial mRNA modification; P:chloroplast RNA modification; F:RNA binding; F:protein binding; F:zinc ion binding; C:mitochondrion; C:chloroplast			IPR011990 (G3DSA:1.25.40.GENE3D); IPR011990 (G3DSA:1.25.40.GENE3D); IPR002885 (PFAM); IPR002885 (PFAM); IPR002885 (TIGRFAM); IPR002885 (PFAM); PTHR47925 (PANTHER); PTHR47925:SF105 (PANTHER); IPR002885 (PROSITE_PROFILES); IPR002885 (PROSITE_PROFILES); IPR002885 (PROSITE_PROFILES); IPR002885 (PROSITE_PROFILES); IPR002885 (PROSITE_PROFILES); IPR002885 (PROSITE_PROFILES); IPR002885 (PROSITE_PROFILES)…	F:GO:0005515	F:protein binding
TRINITY_DN86837_c1_g2_i5	RecName: Full=GTPase Obg; AltName: Full=GTP-binding protein Obg	474	20	0	66	10	P:GO:0006364; P:GO:0009416; P:GO:0009658; P:GO:0009793; P:GO:0010027; F:GO:0000287; F:GO:0003924; F:GO:0005525; C:GO:0009570; C:GO:0009706	P:rRNA processing; P:response to light stimulus; P:chloroplast organization; P:embryo development ending in seed dormancy; P:thylakoid membrane organization; F:magnesium ion binding; F:GTPase activity; F:GTP binding; C:chloroplast stroma; C:chloroplast inner membrane	EC:3.6.1.15	Nucleoside-triphosphate phosphatase	IPR006073 (PRINTS); IPR006169 (PFAM); G3DSA:3.40.50.300 (GENE3D); IPR015349 (PFAM); IPR015349 (TIGRFAM); IPR036346 (G3DSA:2.40.240.GENE3D); IPR014100 (TIGRFAM); IPR036726 (G3DSA:2.70.210.GENE3D); IPR006073 (PFAM); mobidb-lite (MOBIDB_LITE); mobidb-lite (MOBIDB_LITE); PTHR11702 (PANTHER); PTHR11702:SF31 (PANTHER); IPR006074 (PROSITE_PATTERNS); IPR014100 (HAMAP); IPR006169 (PROSITE_PROFILES); IPR01…	F:GO:0000166; F:GO:0000287; F:GO:0003924; F:GO:0005525	F:nucleotide binding; F:magnesium ion binding; F:GTPase activity; F:GTP binding
TRINITY_DN55096_c0_g3_i1	RecName: Full=Cystathionine gamma-synthase; Short=CGS; AltName: Full=O-succinylhomoserine (thiol)-lyase	453	20	0	54.19	24	P:GO:0001887; P:GO:0008284; P:GO:0009405; P:GO:0009970; P:GO:0019279; P:GO:0019343; P:GO:0019346; P:GO:0019458; P:GO:0042631; P:GO:0043418; P:GO:0046677; P:GO:0051289; P:GO:0071268; F:GO:0003962; F:GO:0004121; F:GO:0004123; F:GO:0018826; F:GO:0030170; F:GO:0044540; F:GO:0047804; F:GO:0047982; F:GO:0080146; C:GO:0005829; C:GO:0009570	P:selenium compound metabolic process; P:positive regulation of cell population proliferation; P:pathogenesis; P:cellular response to sulfate starvation; P:L-methionine biosynthetic process from L-homoserine via cystathionine; P:cysteine biosynthetic process via cystathionine; P:transsulfuration; P:methionine catabolic process via 2-oxobutanoate; P:cellular response to water deprivation; P:homocy…	EC:2.5.1.48; EC:4.4.1.8; EC:4.4.1.11; EC:4.4.1.1; EC:4.4.1.2; EC:4.4.1.13	Cystathionine gamma-synthase; Cystathionine beta-lyase; Methionine gamma-lyase; Cystathionine gamma-lyase; Homocysteine desulfhydrase; Cysteine-S-conjugate beta-lyase	IPR000277 (PIRSF); IPR015421 (G3DSA:3.40.640.GENE3D); IPR015422 (G3DSA:3.90.1150.GENE3D); IPR000277 (PFAM); PTHR11808:SF76 (PANTHER); IPR000277 (PANTHER); IPR015424 (SUPERFAMILY)	P:GO:0019346; F:GO:0003824; F:GO:0030170	P:transsulfuration; F:catalytic activity; F:pyridoxal phosphate binding
TRINITY_DN29548_c0_g2_i1	RecName: Full=Glutaredoxin domain-containing cysteine-rich protein 1	222	6	1.59385e-34	54.97	14	P:GO:0007605; P:GO:0010923; P:GO:0022900; P:GO:0042491; P:GO:0048563; P:GO:0060118; P:GO:0060122; F:GO:0005515; F:GO:0009055; F:GO:0015035; C:GO:0005886; C:GO:0005902; C:GO:0032420; C:GO:0060091	P:sensory perception of sound; P:negative regulation of phosphatase activity; P:electron transport chain; P:inner ear auditory receptor cell differentiation; P:post-embryonic animal organ morphogenesis; P:vestibular receptor cell development; P:inner ear receptor cell stereocilium organization; F:protein binding; F:electron transfer activity; F:protein disulfide oxidoreductase activity; C:plasma …			IPR036249 (G3DSA:3.40.30.GENE3D); IPR002109 (PFAM); PTHR45669 (PANTHER); PTHR45669:SF7 (PANTHER); IPR002109 (PROSITE_PROFILES); cd03031 (CDD); IPR036249 (SUPERFAMILY)	F:GO:0015035	F:protein disulfide oxidoreductase activity
TRINITY_DN92113_c1_g7_i18	RecName: Full=Phosphatidylcholine:ceramide cholinephosphotransferase 2; AltName: Full=Sphingomyelin synthase 2	206	20	2.63602e-101	55.94	22	P:GO:0006686; P:GO:0006954; P:GO:0010628; P:GO:0016310; P:GO:0030500; P:GO:0046513; P:GO:0071222; P:GO:0071356; P:GO:1905373; P:GO:2001237; P:GO:2001242; F:GO:0002950; F:GO:0016301; F:GO:0033188; F:GO:0045140; F:GO:0047493; C:GO:0000138; C:GO:0005634; C:GO:0005802; C:GO:0005887; C:GO:0030173; C:GO:0030176	P:sphingomyelin biosynthetic process; P:inflammatory response; P:positive regulation of gene expression; P:phosphorylation; P:regulation of bone mineralization; P:ceramide biosynthetic process; P:cellular response to lipopolysaccharide; P:cellular response to tumor necrosis factor; P:ceramide phosphoethanolamine biosynthetic process; P:negative regulation of extrinsic apoptotic signaling pathway;…	EC:2.7.8.3; EC:2.7.1.227; EC:2.7.8.27	Ceramide cholinephosphotransferase; Inositol phosphorylceramide synthase; Sphingomyelin synthase	IPR025749 (PFAM); PTHR21290:SF54 (PANTHER); PTHR21290 (PANTHER); SIGNAL_PEPTIDE_C_REGION (PHOBIUS); TRANSMEMBRANE (PHOBIUS); TRANSMEMBRANE (PHOBIUS); SIGNAL_PEPTIDE_H_REGION (PHOBIUS); SIGNAL_PEPTIDE_N_REGION (PHOBIUS); TRANSMEMBRANE (PHOBIUS); CYTOPLASMIC_DOMAIN (PHOBIUS); SIGNAL_PEPTIDE (PHOBIUS); CYTOPLASMIC_DOMAIN (PHOBIUS); NON_CYTOPLASMIC_DOMAIN (PHOBIUS); NON_CYTOPLASMIC_DOMAIN (PHOBIUS); …	no GO terms	no GO terms
TRINITY_DN91686_c0_g1_i7	RecName: Full=Signal recognition particle receptor subunit alpha; Short=SR-alpha; AltName: Full=Docking protein alpha; Short=DP-alpha	305	20	3.83802e-123	61.44	12	P:GO:0006614; P:GO:0007409; P:GO:0050708; F:GO:0003924; F:GO:0005047; F:GO:0005515; F:GO:0005525; F:GO:0008312; C:GO:0005785; C:GO:0005786; C:GO:0009570; C:GO:0031226	P:SRP-dependent cotranslational protein targeting to membrane; P:axonogenesis; P:regulation of protein secretion; F:GTPase activity; F:signal recognition particle binding; F:protein binding; F:GTP binding; F:7S RNA binding; C:signal recognition particle receptor complex; C:signal recognition particle, endoplasmic reticulum targeting; C:chloroplast stroma; C:intrinsic component of plasma membrane	EC:3.6.1.15	Nucleoside-triphosphate phosphatase	IPR003593 (SMART); IPR000897 (SMART); IPR013822 (PFAM); IPR000897 (PFAM); G3DSA:3.40.50.300 (GENE3D); IPR042101 (G3DSA:1.20.120.GENE3D); PTHR43134:SF6 (PANTHER); PTHR43134 (PANTHER); IPR000897 (PROSITE_PATTERNS); SIGNAL_PEPTIDE_H_REGION (PHOBIUS); NON_CYTOPLASMIC_DOMAIN (PHOBIUS); SIGNAL_PEPTIDE_C_REGION (PHOBIUS); SIGNAL_PEPTIDE_N_REGION (PHOBIUS); SIGNAL_PEPTIDE (PHOBIUS); cd17876 (CDD); IPR036…	P:GO:0006614; F:GO:0005525	P:SRP-dependent cotranslational protein targeting to membrane; F:GTP binding
TRINITY_DN85797_c0_g2_i1	RecName: Full=Acid beta-fructofuranosidase; AltName: Full=Acid invertase; Short=AI; AltName: Full=Acid sucrose hydrolase; AltName: Full=Vacuolar invertase; Flags: Precursor	660	20	0	74.15	24	P:GO:0005985; P:GO:0009611; P:GO:0009617; P:GO:0009651; P:GO:0009738; P:GO:0050832; P:GO:0071370; P:GO:0080167; F:GO:0004575; F:GO:0005515; F:GO:0033841; F:GO:0033949; F:GO:0047207; F:GO:0050306; F:GO:0051669; C:GO:0000325; C:GO:0005618; C:GO:0005774; C:GO:0005775; C:GO:0005789; C:GO:0005794; C:GO:0005886; C:GO:0016021; C:GO:0048046	P:sucrose metabolic process; P:response to wounding; P:response to bacterium; P:response to salt stress; P:abscisic acid-activated signaling pathway; P:defense response to fungus; P:cellular response to gibberellin stimulus; P:response to karrikin; F:sucrose alpha-glucosidase activity; F:protein binding; F:6G-fructosyltransferase activity; F:fructan beta-(2,6)-fructosidase activity; F:1,2-beta-fr…	EC:3.2.1.80; EC:3.2.1.20; EC:3.2.1.154; EC:2.4.1.100; EC:2.4.1.243; EC:2.4.1.99; EC:3.2.1.26; EC:3.2.1.48	Fructan beta-fructosidase; Alpha-glucosidase; Fructan beta-(2,6)-fructosidase; 2,1-fructan:2,1-fructan 1-fructosyltransferase; 6(G)-fructosyltransferase; Sucrose:sucrose fructosyltransferase; Beta-fructofuranosidase; Sucrose alpha-glucosidase	IPR001362 (SMART); IPR021792 (PFAM); IPR023296 (G3DSA:2.115.10.GENE3D); G3DSA:2.60.120.560 (GENE3D); IPR013189 (PFAM); IPR013148 (PFAM); PTHR31953 (PANTHER); PTHR31953:SF93 (PANTHER); IPR018053 (PROSITE_PATTERNS); CYTOPLASMIC_DOMAIN (PHOBIUS); NON_CYTOPLASMIC_DOMAIN (PHOBIUS); TRANSMEMBRANE (PHOBIUS); cd18624 (CDD); IPR023296 (SUPERFAMILY); IPR013320 (SUPERFAMILY); TMhelix (TMHMM)	P:GO:0005975; F:GO:0004553; F:GO:0004564; F:GO:0004575	P:carbohydrate metabolic process; F:hydrolase activity, hydrolyzing O-glycosyl compounds; F:beta-fructofuranosidase activity; F:sucrose alpha-glucosidase activity
TRINITY_DN85797_c0_g1_i2	RecName: Full=Acid beta-fructofuranosidase; AltName: Full=Acid invertase; Short=AI; AltName: Full=Acid sucrose hydrolase; AltName: Full=Vacuolar invertase; Flags: Precursor	656	20	0	74.19	24	P:GO:0005985; P:GO:0009611; P:GO:0009651; P:GO:0009738; P:GO:0042742; P:GO:0050832; P:GO:0052576; P:GO:0071370; P:GO:0080167; F:GO:0004575; F:GO:0005515; F:GO:0033841; F:GO:0033949; F:GO:0047207; F:GO:0050306; C:GO:0000325; C:GO:0005618; C:GO:0005774; C:GO:0005775; C:GO:0005789; C:GO:0005794; C:GO:0005886; C:GO:0016021; C:GO:0048046	P:sucrose metabolic process; P:response to wounding; P:response to salt stress; P:abscisic acid-activated signaling pathway; P:defense response to bacterium; P:defense response to fungus; P:carbohydrate storage; P:cellular response to gibberellin stimulus; P:response to karrikin; F:sucrose alpha-glucosidase activity; F:protein binding; F:6G-fructosyltransferase activity; F:fructan beta-(2,6)-fruc…	EC:3.2.1.20; EC:3.2.1.154; EC:2.4.1.100; EC:2.4.1.243; EC:2.4.1.99; EC:3.2.1.26; EC:3.2.1.48	Alpha-glucosidase; Fructan beta-(2,6)-fructosidase; 2,1-fructan:2,1-fructan 1-fructosyltransferase; 6(G)-fructosyltransferase; Sucrose:sucrose fructosyltransferase; Beta-fructofuranosidase; Sucrose alpha-glucosidase	IPR001362 (SMART); IPR021792 (PFAM); IPR013189 (PFAM); G3DSA:2.60.120.560 (GENE3D); IPR013148 (PFAM); IPR023296 (G3DSA:2.115.10.GENE3D); PTHR31953 (PANTHER); PTHR31953:SF93 (PANTHER); IPR018053 (PROSITE_PATTERNS); CYTOPLASMIC_DOMAIN (PHOBIUS); NON_CYTOPLASMIC_DOMAIN (PHOBIUS); TRANSMEMBRANE (PHOBIUS); cd18624 (CDD); IPR013320 (SUPERFAMILY); IPR023296 (SUPERFAMILY); TMhelix (TMHMM)	P:GO:0005975; F:GO:0004553; F:GO:0004564; F:GO:0004575	P:carbohydrate metabolic process; F:hydrolase activity, hydrolyzing O-glycosyl compounds; F:beta-fructofuranosidase activity; F:sucrose alpha-glucosidase activity
TRINITY_DN88683_c0_g1_i2	RecName: Full=Sulfate adenylyltransferase; AltName: Full=ATP-sulfurylase; AltName: Full=Sulfate adenylate transferase; Short=SAT	463	20	0	64.7	19	P:GO:0000103; P:GO:0001887; P:GO:0007596; P:GO:0009970; P:GO:0016310; P:GO:0046686; P:GO:0050428; P:GO:0060348; P:GO:0070206; P:GO:0070814; F:GO:0004020; F:GO:0004781; F:GO:0005524; F:GO:0042803; C:GO:0005739; C:GO:0005829; C:GO:0005886; C:GO:0009336; C:GO:0009570	P:sulfate assimilation; P:selenium compound metabolic process; P:blood coagulation; P:cellular response to sulfate starvation; P:phosphorylation; P:response to cadmium ion; P:3'-phosphoadenosine 5'-phosphosulfate biosynthetic process; P:bone development; P:protein trimerization; P:hydrogen sulfide biosynthetic process; F:adenylylsulfate kinase activity; F:sulfate adenylyltransferase (ATP) activit…	EC:2.7.7.4; EC:2.7.1.25	Sulfate adenylyltransferase; Adenylyl-sulfate kinase	IPR024951 (PFAM); IPR025980 (PFAM); IPR014729 (G3DSA:3.40.50.GENE3D); G3DSA:3.10.400.10 (GENE3D); IPR002650 (TIGRFAM); PTHR11055:SF41 (PANTHER); PTHR11055 (PANTHER); IPR002650 (CDD); SSF52374 (SUPERFAMILY); IPR015947 (SUPERFAMILY)	P:GO:0000103; F:GO:0004781	P:sulfate assimilation; F:sulfate adenylyltransferase (ATP) activity
TRINITY_DN86669_c7_g6_i9	RecName: Full=Transcription initiation factor IIB; AltName: Full=General transcription factor TFIIB	278	20	1.21232e-172	65.22	29	P:GO:0000769; P:GO:0001113; P:GO:0001174; P:GO:0009960; P:GO:0010183; P:GO:0016573; P:GO:0042789; P:GO:0042795; P:GO:0043923; P:GO:0046686; P:GO:0051123; P:GO:0060261; P:GO:0080092; P:GO:1904798; P:GO:1990114; F:GO:0000979; F:GO:0001139; F:GO:0003700; F:GO:0004402; F:GO:0008270; F:GO:0016251; F:GO:0017025; F:GO:0046966; F:GO:1990841; C:GO:0005669; C:GO:0005694; C:GO:0005737; C:GO:0016604; C:GO:00…	P:syncytium formation by mitosis without cytokinesis; P:transcription open complex formation at RNA polymerase II promoter; P:transcriptional start site selection at RNA polymerase II promoter; P:endosperm development; P:pollen tube guidance; P:histone acetylation; P:mRNA transcription by RNA polymerase II; P:snRNA transcription by RNA polymerase II; P:positive regulation by host of viral transcr…	EC:2.3.1.48	Histone acetyltransferase	IPR000812 (PRINTS); IPR013763 (SMART); IPR013137 (PFAM); IPR013150 (PFAM); G3DSA:1.10.472.170 (GENE3D); IPR000812 (PANTHER); PTHR11618:SF69 (PANTHER); IPR023486 (PROSITE_PATTERNS); IPR013137 (PROSITE_PROFILES); IPR013763 (CDD); IPR036915 (SUPERFAMILY); IPR036915 (SUPERFAMILY); SSF57783 (SUPERFAMILY)	P:GO:0006352; P:GO:0070897; F:GO:0017025	P:DNA-templated transcription, initiation; P:transcription preinitiation complex assembly; F:TBP-class protein binding
TRINITY_DN86669_c7_g6_i11	RecName: Full=Transcription initiation factor IIB; AltName: Full=General transcription factor TFIIB	172	20	4.27428e-119	67	29	P:GO:0000769; P:GO:0001113; P:GO:0001174; P:GO:0009960; P:GO:0010183; P:GO:0016573; P:GO:0042789; P:GO:0042795; P:GO:0043923; P:GO:0046686; P:GO:0051123; P:GO:0060261; P:GO:0080092; P:GO:1904798; P:GO:1990114; F:GO:0000979; F:GO:0001139; F:GO:0003700; F:GO:0004402; F:GO:0008270; F:GO:0016251; F:GO:0017025; F:GO:0046966; F:GO:1990841; C:GO:0005669; C:GO:0005694; C:GO:0005737; C:GO:0016604; C:GO:00…	P:syncytium formation by mitosis without cytokinesis; P:transcription open complex formation at RNA polymerase II promoter; P:transcriptional start site selection at RNA polymerase II promoter; P:endosperm development; P:pollen tube guidance; P:histone acetylation; P:mRNA transcription by RNA polymerase II; P:snRNA transcription by RNA polymerase II; P:positive regulation by host of viral transcr…	EC:2.3.1.48	Histone acetyltransferase	IPR000812 (PRINTS); IPR013137 (PFAM); IPR013150 (PFAM); G3DSA:1.10.472.170 (GENE3D); PTHR11618:SF69 (PANTHER); IPR000812 (PANTHER); IPR023486 (PROSITE_PATTERNS); IPR013137 (PROSITE_PROFILES); IPR013763 (CDD); IPR036915 (SUPERFAMILY); SSF57783 (SUPERFAMILY)	P:GO:0006352; P:GO:0070897; F:GO:0017025	P:DNA-templated transcription, initiation; P:transcription preinitiation complex assembly; F:TBP-class protein binding
TRINITY_DN86669_c7_g6_i4	RecName: Full=Transcription initiation factor IIB; AltName: Full=General transcription factor TFIIB	109	20	4.97123e-58	67.23	28	P:GO:0000769; P:GO:0001174; P:GO:0009960; P:GO:0010183; P:GO:0016573; P:GO:0042789; P:GO:0042795; P:GO:0043923; P:GO:0046686; P:GO:0051123; P:GO:0060261; P:GO:0080092; P:GO:1904798; P:GO:1990114; F:GO:0000979; F:GO:0001139; F:GO:0003700; F:GO:0004402; F:GO:0008270; F:GO:0016251; F:GO:0017025; F:GO:0046966; F:GO:1990841; C:GO:0005669; C:GO:0005694; C:GO:0005737; C:GO:0016604; C:GO:0097550	P:syncytium formation by mitosis without cytokinesis; P:transcriptional start site selection at RNA polymerase II promoter; P:endosperm development; P:pollen tube guidance; P:histone acetylation; P:mRNA transcription by RNA polymerase II; P:snRNA transcription by RNA polymerase II; P:positive regulation by host of viral transcription; P:response to cadmium ion; P:RNA polymerase II preinitiation c…	EC:2.3.1.48	Histone acetyltransferase	IPR000812 (PRINTS); IPR013763 (SMART); IPR013150 (PFAM); G3DSA:1.10.472.10 (GENE3D); PTHR11618:SF59 (PANTHER); IPR000812 (PANTHER); IPR013763 (CDD); IPR036915 (SUPERFAMILY)	P:GO:0006352; P:GO:0070897; F:GO:0017025	P:DNA-templated transcription, initiation; P:transcription preinitiation complex assembly; F:TBP-class protein binding
TRINITY_DN15961_c0_g1_i1	RecName: Full=Probable exo-1,4-beta-xylosidase bxlB; AltName: Full=1,4-beta-D-xylan xylohydrolase bxlB; AltName: Full=Beta-xylosidase bxlB; AltName: Full=Xylobiase bxlB; Flags: Precursor	632	20	0	65.14	13	P:GO:0009627; P:GO:0010214; P:GO:0031222; P:GO:0042732; P:GO:0045493; F:GO:0009044; F:GO:0042285; F:GO:0046556; C:GO:0005774; C:GO:0009505; C:GO:0009506; C:GO:0009507; C:GO:0048046	P:systemic acquired resistance; P:seed coat development; P:arabinan catabolic process; P:D-xylose metabolic process; P:xylan catabolic process; F:xylan 1,4-beta-xylosidase activity; F:xylosyltransferase activity; F:alpha-L-arabinofuranosidase activity; C:vacuolar membrane; C:plant-type cell wall; C:plasmodesma; C:chloroplast; C:apoplast	EC:3.2.1.55; EC:3.2.1.37	Non-reducing end alpha-L-arabinofuranosidase; Xylan 1,4-beta-xylosidase	IPR001764 (PRINTS); IPR026891 (SMART); IPR002772 (PFAM); IPR036881 (G3DSA:3.40.50.GENE3D); IPR013783 (G3DSA:2.60.40.GENE3D); IPR036962 (G3DSA:3.20.20.GENE3D); IPR001764 (PFAM); IPR026891 (PFAM); PTHR42721:SF30 (PANTHER); PTHR42721 (PANTHER); IPR017853 (SUPERFAMILY); IPR036881 (SUPERFAMILY)	P:GO:0005975; F:GO:0004553	P:carbohydrate metabolic process; F:hydrolase activity, hydrolyzing O-glycosyl compounds
TRINITY_DN76609_c1_g1_i2	RecName: Full=1-deoxy-D-xylulose-5-phosphate synthase; AltName: Full=1-deoxyxylulose-5-phosphate synthase; Short=DXP synthase; Short=DXPS	718	20	0	75.93	10	P:GO:0009228; P:GO:0015995; P:GO:0016114; P:GO:0019288; P:GO:0052865; F:GO:0000287; F:GO:0008661; F:GO:0030976; F:GO:0042802; C:GO:0009570	P:thiamine biosynthetic process; P:chlorophyll biosynthetic process; P:terpenoid biosynthetic process; P:isopentenyl diphosphate biosynthetic process, methylerythritol 4-phosphate pathway; P:1-deoxy-D-xylulose 5-phosphate biosynthetic process; F:magnesium ion binding; F:1-deoxy-D-xylulose-5-phosphate synthase activity; F:thiamine pyrophosphate binding; F:identical protein binding; C:chloroplast s…	EC:2.2.1.7	1-deoxy-D-xylulose-5-phosphate synthase	IPR005475 (SMART); IPR005477 (TIGRFAM); IPR005477 (PFAM); IPR009014 (G3DSA:3.40.50.GENE3D); IPR005475 (PFAM); IPR033248 (PFAM); G3DSA:3.40.50.970 (GENE3D); PTHR43322:SF6 (PANTHER); IPR005477 (PANTHER); IPR020826 (PROSITE_PATTERNS); IPR005477 (HAMAP); cd07033 (CDD); IPR005477 (CDD); SignalP-TM (SIGNALP_GRAM_POSITIVE); IPR009014 (SUPERFAMILY); IPR029061 (SUPERFAMILY); IPR029061 (SUPERFAMILY)	P:GO:0016114; F:GO:0003824; F:GO:0008661	P:terpenoid biosynthetic process; F:catalytic activity; F:1-deoxy-D-xylulose-5-phosphate synthase activity
TRINITY_DN72227_c0_g1_i1	RecName: Full=Pirin; AltName: Full=Probable quercetin 2,3-dioxygenase PIR; Short=Probable quercetinase	219	20	9.70792e-120	61.91	17	P:GO:0006366; P:GO:0007586; P:GO:0009738; P:GO:0009785; P:GO:0010466; P:GO:0030224; P:GO:0042742; P:GO:0055114; P:GO:1903506; F:GO:0003712; F:GO:0005515; F:GO:0008127; F:GO:0030414; F:GO:0046872; C:GO:0005654; C:GO:0005829; C:GO:0005886	P:transcription by RNA polymerase II; P:digestion; P:abscisic acid-activated signaling pathway; P:blue light signaling pathway; P:negative regulation of peptidase activity; P:monocyte differentiation; P:defense response to bacterium; P:oxidation-reduction process; P:regulation of nucleic acid-templated transcription; F:transcription coregulator activity; F:protein binding; F:quercetin 2,3-dioxyge…	EC:1.13.11; EC:1.13.11.24	Acting on single donors with incorporation of molecular oxygen (oxygenases). The oxygen incorporated need not be derived from O(2); Quercetin 2,3-dioxygenase	IPR014710 (G3DSA:2.60.120.GENE3D); IPR014710 (G3DSA:2.60.120.GENE3D); IPR012093 (PIRSF); IPR008778 (PFAM); IPR003829 (PFAM); PTHR13903:SF21 (PANTHER); PTHR13903 (PANTHER); IPR011051 (SUPERFAMILY)	no GO terms	no GO terms
TRINITY_DN86669_c7_g6_i8	RecName: Full=Transcription initiation factor IIB; AltName: Full=General transcription factor TFIIB	75	6	5.19413e-26	85.21	12	P:GO:0001174; P:GO:0009960; P:GO:0010183; P:GO:0051123; P:GO:0080092; F:GO:0000979; F:GO:0001139; F:GO:0017025; F:GO:0046872; C:GO:0005634; C:GO:0005737; C:GO:0097550	P:transcriptional start site selection at RNA polymerase II promoter; P:endosperm development; P:pollen tube guidance; P:RNA polymerase II preinitiation complex assembly; P:regulation of pollen tube growth; F:RNA polymerase II core promoter sequence-specific DNA binding; F:RNA polymerase II complex recruiting activity; F:TBP-class protein binding; F:metal ion binding; C:nucleus; C:cytoplasm; C:tr…			IPR000812 (PRINTS); G3DSA:1.10.472.10 (GENE3D); IPR013150 (PFAM); IPR000812 (PANTHER); PTHR11618:SF69 (PANTHER); IPR013763 (CDD); IPR036915 (SUPERFAMILY)	P:GO:0006352; P:GO:0070897; F:GO:0017025	P:DNA-templated transcription, initiation; P:transcription preinitiation complex assembly; F:TBP-class protein binding
TRINITY_DN86005_c3_g1_i1	RecName: Full=Transcription factor MYB46; AltName: Full=Myb-related protein 46; Short=AtMYB46	285	20	2.03186e-57	85.04	24	P:GO:0000162; P:GO:0002213; P:GO:0009611; P:GO:0009737; P:GO:0009759; P:GO:0009800; P:GO:0010089; P:GO:0010091; P:GO:0010119; P:GO:0010214; P:GO:0010438; P:GO:0035017; P:GO:0045892; P:GO:0045893; P:GO:0048364; P:GO:0050832; P:GO:1900384; P:GO:1901002; P:GO:1901348; P:GO:1901957; F:GO:0000987; F:GO:0003700; F:GO:0005515; C:GO:0005634	P:tryptophan biosynthetic process; P:defense response to insect; P:response to wounding; P:response to abscisic acid; P:indole glucosinolate biosynthetic process; P:cinnamic acid biosynthetic process; P:xylem development; P:trichome branching; P:regulation of stomatal movement; P:seed coat development; P:cellular response to sulfur starvation; P:cuticle pattern formation; P:negative regulation of…			IPR001005 (SMART); G3DSA:1.10.10.60 (GENE3D); G3DSA:1.10.10.60 (GENE3D); IPR001005 (PFAM); mobidb-lite (MOBIDB_LITE); PTHR47997 (PANTHER); PTHR47997:SF44 (PANTHER); PTHR47997:SF44 (PANTHER); IPR017930 (PROSITE_PROFILES); IPR017930 (PROSITE_PROFILES); IPR001005 (CDD); IPR001005 (CDD); IPR009057 (SUPERFAMILY)	no GO terms	no GO terms
TRINITY_DN82894_c0_g1_i3	RecName: Full=Triose phosphate/phosphate translocator, chloroplastic; Short=cTPT; Flags: Precursor	396	20	0	64.83	25	P:GO:0007033; P:GO:0007276; P:GO:0009624; P:GO:0009643; P:GO:0009744; P:GO:0009749; P:GO:0010109; P:GO:0010152; P:GO:0015713; P:GO:0015760; P:GO:0035436; P:GO:0080167; P:GO:0089722; F:GO:0005315; F:GO:0009670; F:GO:0015120; F:GO:0015121; F:GO:0015152; F:GO:0019904; C:GO:0005739; C:GO:0005774; C:GO:0005794; C:GO:0009528; C:GO:0016021; C:GO:0031969	P:vacuole organization; P:gamete generation; P:response to nematode; P:photosynthetic acclimation; P:response to sucrose; P:response to glucose; P:regulation of photosynthesis; P:pollen maturation; P:phosphoglycerate transmembrane transport; P:glucose-6-phosphate transport; P:triose phosphate transmembrane transport; P:response to karrikin; P:phosphoenolpyruvate transmembrane transport; F:inorgan…			IPR004853 (PFAM); IPR004696 (TIGRFAM); PTHR11132 (PANTHER); PTHR11132:SF399 (PANTHER); CYTOPLASMIC_DOMAIN (PHOBIUS); NON_CYTOPLASMIC_DOMAIN (PHOBIUS); TRANSMEMBRANE (PHOBIUS); TRANSMEMBRANE (PHOBIUS); TRANSMEMBRANE (PHOBIUS); TRANSMEMBRANE (PHOBIUS); TRANSMEMBRANE (PHOBIUS); CYTOPLASMIC_DOMAIN (PHOBIUS); NON_CYTOPLASMIC_DOMAIN (PHOBIUS); NON_CYTOPLASMIC_DOMAIN (PHOBIUS); TRANSMEMBRANE (PHOBIUS); …	P:GO:0055085; F:GO:0022857; C:GO:0016021	P:transmembrane transport; F:transmembrane transporter activity; C:integral component of membrane
TRINITY_DN88136_c0_g1_i1	RecName: Full=Long-chain-fatty-acid--CoA ligase 5; AltName: Full=Arachidonate--CoA ligase; AltName: Full=Long-chain acyl-CoA synthetase 5; Short=LACS 5	378	20	0	64.82	57	P:GO:0000038; P:GO:0001666; P:GO:0007405; P:GO:0007584; P:GO:0008654; P:GO:0009629; P:GO:0009651; P:GO:0009744; P:GO:0009749; P:GO:0010025; P:GO:0010143; P:GO:0010193; P:GO:0010311; P:GO:0010747; P:GO:0010867; P:GO:0010976; P:GO:0032024; P:GO:0032307; P:GO:0032869; P:GO:0033211; P:GO:0034201; P:GO:0035338; P:GO:0036109; P:GO:0042178; P:GO:0042493; P:GO:0043651; P:GO:0048545; P:GO:0050766; P:GO:00…	P:very long-chain fatty acid metabolic process; P:response to hypoxia; P:neuroblast proliferation; P:response to nutrient; P:phospholipid biosynthetic process; P:response to gravity; P:response to salt stress; P:response to sucrose; P:response to glucose; P:wax biosynthetic process; P:cutin biosynthetic process; P:response to ozone; P:lateral root formation; P:positive regulation of long-chain fa…	EC:6.2.1.24; EC:6.2.1.3; EC:6.2.1.1; EC:6.2.1.15	Phytanate--CoA ligase; Long-chain-fatty-acid--CoA ligase; Acetate--CoA ligase; Arachidonate--CoA ligase	IPR042099 (G3DSA:3.40.50.GENE3D); IPR000873 (PFAM); PTHR43272 (PANTHER); PTHR43272:SF4 (PANTHER); cd05927 (CDD); SSF56801 (SUPERFAMILY)	no GO terms	no GO terms
TRINITY_DN87676_c4_g8_i3	RecName: Full=Uncharacterized oxidoreductase At1g06690, chloroplastic; Flags: Precursor	105	2	1.06685e-23	74.45	8	P:GO:0042820; P:GO:0042821; P:GO:0055114; F:GO:0050236; F:GO:0070402; C:GO:0009535; C:GO:0009941; C:GO:0010287	P:vitamin B6 catabolic process; P:pyridoxal biosynthetic process; P:oxidation-reduction process; F:pyridoxine:NADP 4-dehydrogenase activity; F:NADPH binding; C:chloroplast thylakoid membrane; C:chloroplast envelope; C:plastoglobule	EC:1.1.1.65	Pyridoxine 4-dehydrogenase	IPR036812 (G3DSA:3.20.20.GENE3D); PTHR43625:SF22 (PANTHER); PTHR43625 (PANTHER); NON_CYTOPLASMIC_DOMAIN (PHOBIUS); CYTOPLASMIC_DOMAIN (PHOBIUS); TRANSMEMBRANE (PHOBIUS); IPR036812 (SUPERFAMILY)	no GO terms	no GO terms
TRINITY_DN55211_c0_g2_i1	RecName: Full=L-glyceraldehyde 3-phosphate reductase; Short=GAP reductase	89	17	2.23408e-47	64.31	9	P:GO:0042820; P:GO:0042821; P:GO:0055114; F:GO:0050236; F:GO:0070402; C:GO:0005634; C:GO:0009535; C:GO:0009941; C:GO:0010287	P:vitamin B6 catabolic process; P:pyridoxal biosynthetic process; P:oxidation-reduction process; F:pyridoxine:NADP 4-dehydrogenase activity; F:NADPH binding; C:nucleus; C:chloroplast thylakoid membrane; C:chloroplast envelope; C:plastoglobule	EC:1.1.1.65	Pyridoxine 4-dehydrogenase	IPR023210 (PFAM); IPR036812 (G3DSA:3.20.20.GENE3D); PTHR43625 (PANTHER); PTHR43625:SF16 (PANTHER); IPR036812 (SUPERFAMILY)	no GO terms	no GO terms
TRINITY_DN57115_c0_g1_i2	RecName: Full=L-glyceraldehyde 3-phosphate reductase; Short=GAP reductase	111	20	5.04125e-58	57.62	9	P:GO:0042820; P:GO:0042821; P:GO:0055114; F:GO:0050236; F:GO:0070402; C:GO:0005634; C:GO:0009535; C:GO:0009941; C:GO:0010287	P:vitamin B6 catabolic process; P:pyridoxal biosynthetic process; P:oxidation-reduction process; F:pyridoxine:NADP 4-dehydrogenase activity; F:NADPH binding; C:nucleus; C:chloroplast thylakoid membrane; C:chloroplast envelope; C:plastoglobule	EC:1.1.1.65	Pyridoxine 4-dehydrogenase	IPR023210 (PFAM); IPR036812 (G3DSA:3.20.20.GENE3D); PTHR43625 (PANTHER); PTHR43625:SF16 (PANTHER); IPR036812 (SUPERFAMILY)	no GO terms	no GO terms
TRINITY_DN70841_c0_g1_i1	RecName: Full=Aquaporin TIP1-3; AltName: Full=Gamma-tonoplast intrinsic protein 3; Short=Gamma-TIP3; AltName: Full=Tonoplast intrinsic protein 1-3; Short=AtTIP1;3	196	20	2.40366e-113	80.57	24	P:GO:0006833; P:GO:0006914; P:GO:0007033; P:GO:0009826; P:GO:0030104; P:GO:0042742; P:GO:0048366; P:GO:0071918; P:GO:0072489; P:GO:0080170; F:GO:0015200; F:GO:0015204; F:GO:0015250; F:GO:0042802; C:GO:0005783; C:GO:0005794; C:GO:0005886; C:GO:0009505; C:GO:0009506; C:GO:0009941; C:GO:0016021; C:GO:0032586; C:GO:0042807; C:GO:0043674	P:water transport; P:autophagy; P:vacuole organization; P:unidimensional cell growth; P:water homeostasis; P:defense response to bacterium; P:leaf development; P:urea transmembrane transport; P:methylammonium transmembrane transport; P:hydrogen peroxide transmembrane transport; F:methylammonium transmembrane transporter activity; F:urea transmembrane transporter activity; F:water channel activity…			IPR000425 (PRINTS); IPR023271 (G3DSA:1.20.1080.GENE3D); IPR000425 (PFAM); PTHR45665:SF2 (PANTHER); IPR034294 (PANTHER); IPR022357 (PROSITE_PATTERNS); TRANSMEMBRANE (PHOBIUS); TRANSMEMBRANE (PHOBIUS); CYTOPLASMIC_DOMAIN (PHOBIUS); NON_CYTOPLASMIC_DOMAIN (PHOBIUS); TRANSMEMBRANE (PHOBIUS); NON_CYTOPLASMIC_DOMAIN (PHOBIUS); NON_CYTOPLASMIC_DOMAIN (PHOBIUS); TRANSMEMBRANE (PHOBIUS); TRANSMEMBRANE (PH…	P:GO:0055085; F:GO:0015267; C:GO:0016020	P:transmembrane transport; F:channel activity; C:membrane
TRINITY_DN88241_c0_g1_i3	RecName: Full=LRR receptor-like serine/threonine-protein kinase FLS2; AltName: Full=Protein FLAGELLIN-SENSING 2; AltName: Full=Protein FLAGELLIN-SENSITIVE 2; Flags: Precursor	924	20	0	53.36	45	P:GO:0006833; P:GO:0006898; P:GO:0007178; P:GO:0009553; P:GO:0009556; P:GO:0009611; P:GO:0009755; P:GO:0009934; P:GO:0010067; P:GO:0010082; P:GO:0010089; P:GO:0010103; P:GO:0010183; P:GO:0010223; P:GO:0010234; P:GO:0010359; P:GO:0016032; P:GO:0016045; P:GO:0030104; P:GO:0042659; P:GO:0042742; P:GO:0045184; P:GO:0046777; P:GO:0048481; P:GO:0051302; P:GO:0052544; P:GO:0055075; P:GO:0090708; P:GO:19…	P:water transport; P:receptor-mediated endocytosis; P:transmembrane receptor protein serine/threonine kinase signaling pathway; P:embryo sac development; P:microsporogenesis; P:response to wounding; P:hormone-mediated signaling pathway; P:regulation of meristem structural organization; P:procambium histogenesis; P:regulation of root meristem growth; P:xylem development; P:stomatal complex morphog…	EC:2.7.11; EC:2.7.11.30	Transferring phosphorus-containing groups; Receptor protein serine/threonine kinase	PR00019 (PRINTS); IPR003591 (SMART); SM00365 (SMART); IPR000719 (SMART); IPR032675 (G3DSA:3.80.10.GENE3D); IPR032675 (G3DSA:3.80.10.GENE3D); G3DSA:1.10.510.10 (GENE3D); IPR001611 (PFAM); IPR000719 (PFAM); G3DSA:3.30.200.20 (GENE3D); IPR032675 (G3DSA:3.80.10.GENE3D); PTHR27000:SF616 (PANTHER); PTHR27000 (PANTHER); PTHR27000 (PANTHER); PTHR27000 (PANTHER); PTHR27000:SF616 (PANTHER); PTHR27000:SF616…	P:GO:0006468; F:GO:0004672; F:GO:0005515; F:GO:0005524	P:protein phosphorylation; F:protein kinase activity; F:protein binding; F:ATP binding
TRINITY_DN56393_c1_g4_i1	RecName: Full=Probable aquaporin PIP1-4; AltName: Full=Plasma membrane intrinsic protein 1-4; Short=AtPIP1;4; AltName: Full=Transmembrane protein C; Short=TMP-C	287	20	0	88.86	16	P:GO:0006833; P:GO:0009414; P:GO:0051289; P:GO:0051290; P:GO:0055085; F:GO:0005515; F:GO:0015250; C:GO:0005739; C:GO:0005773; C:GO:0005783; C:GO:0005829; C:GO:0005886; C:GO:0009506; C:GO:0009941; C:GO:0016021; C:GO:0032991	P:water transport; P:response to water deprivation; P:protein homotetramerization; P:protein heterotetramerization; P:transmembrane transport; F:protein binding; F:water channel activity; C:mitochondrion; C:vacuole; C:endoplasmic reticulum; C:cytosol; C:plasma membrane; C:plasmodesma; C:chloroplast envelope; C:integral component of membrane; C:protein-containing complex			IPR000425 (PRINTS); IPR023271 (G3DSA:1.20.1080.GENE3D); IPR000425 (PFAM); IPR000425 (TIGRFAM); mobidb-lite (MOBIDB_LITE); PTHR45687:SF57 (PANTHER); IPR034294 (PANTHER); IPR022357 (PROSITE_PATTERNS); CYTOPLASMIC_DOMAIN (PHOBIUS); NON_CYTOPLASMIC_DOMAIN (PHOBIUS); CYTOPLASMIC_DOMAIN (PHOBIUS); CYTOPLASMIC_DOMAIN (PHOBIUS); NON_CYTOPLASMIC_DOMAIN (PHOBIUS); NON_CYTOPLASMIC_DOMAIN (PHOBIUS); TRANSMEM…	P:GO:0055085; F:GO:0015267; C:GO:0016020	P:transmembrane transport; F:channel activity; C:membrane
TRINITY_DN65565_c0_g3_i1	RecName: Full=Aquaporin PIP2-1; AltName: Full=Plasma membrane intrinsic protein 2-1; AltName: Full=ZmPIP2-1; AltName: Full=ZmPIP2;1	71	20	4.97857e-39	90.52	16	P:GO:0006833; P:GO:0009414; P:GO:0009737; P:GO:0048767; P:GO:0051289; P:GO:0051290; P:GO:0080170; F:GO:0003729; F:GO:0015250; F:GO:0031625; C:GO:0005634; C:GO:0005773; C:GO:0005886; C:GO:0009506; C:GO:0016021; C:GO:0032991	P:water transport; P:response to water deprivation; P:response to abscisic acid; P:root hair elongation; P:protein homotetramerization; P:protein heterotetramerization; P:hydrogen peroxide transmembrane transport; F:mRNA binding; F:water channel activity; F:ubiquitin protein ligase binding; C:nucleus; C:vacuole; C:plasma membrane; C:plasmodesma; C:integral component of membrane; C:protein-contain…			IPR023271 (G3DSA:1.20.1080.GENE3D); IPR000425 (PFAM); IPR034294 (PANTHER); PTHR45687:SF64 (PANTHER); CYTOPLASMIC_DOMAIN (PHOBIUS); TRANSMEMBRANE (PHOBIUS); NON_CYTOPLASMIC_DOMAIN (PHOBIUS); IPR023271 (SUPERFAMILY); TMhelix (TMHMM)	P:GO:0055085; F:GO:0015267; C:GO:0016020	P:transmembrane transport; F:channel activity; C:membrane
TRINITY_DN81203_c1_g3_i4	RecName: Full=Sugar transporter ERD6-like 7	481	20	0	67.57	22	P:GO:0006829; P:GO:0009409; P:GO:0009414; P:GO:0009651; P:GO:0009737; P:GO:0010030; P:GO:0010200; P:GO:0015749; P:GO:0015767; P:GO:0015768; P:GO:0015770; P:GO:0015771; P:GO:0042593; F:GO:0005515; F:GO:0015145; F:GO:0015574; C:GO:0005634; C:GO:0005783; C:GO:0005794; C:GO:0005886; C:GO:0009705; C:GO:0016021	P:zinc ion transport; P:response to cold; P:response to water deprivation; P:response to salt stress; P:response to abscisic acid; P:positive regulation of seed germination; P:response to chitin; P:monosaccharide transmembrane transport; P:lactose transport; P:maltose transport; P:sucrose transport; P:trehalose transport; P:glucose homeostasis; F:protein binding; F:monosaccharide transmembrane tr…			IPR003663 (PRINTS); IPR005828 (PFAM); IPR003663 (TIGRFAM); G3DSA:1.20.1250.20 (GENE3D); mobidb-lite (MOBIDB_LITE); PTHR48021:SF13 (PANTHER); PTHR48021 (PANTHER); IPR005829 (PROSITE_PATTERNS); CYTOPLASMIC_DOMAIN (PHOBIUS); CYTOPLASMIC_DOMAIN (PHOBIUS); NON_CYTOPLASMIC_DOMAIN (PHOBIUS); CYTOPLASMIC_DOMAIN (PHOBIUS); TRANSMEMBRANE (PHOBIUS); TRANSMEMBRANE (PHOBIUS); TRANSMEMBRANE (PHOBIUS); NON_CYTO…	P:GO:0055085; F:GO:0022857; C:GO:0016020; C:GO:0016021	P:transmembrane transport; F:transmembrane transporter activity; C:membrane; C:integral component of membrane
TRINITY_DN90286_c0_g7_i4	---NA---	126									IPR012595 (PFAM); PTHR34951 (PANTHER); NON_CYTOPLASMIC_DOMAIN (PHOBIUS); TRANSMEMBRANE (PHOBIUS); CYTOPLASMIC_DOMAIN (PHOBIUS); IPR012595 (HAMAP); SSF103441 (SUPERFAMILY); TMhelix (TMHMM)	C:GO:0009512	C:cytochrome b6f complex
TRINITY_DN107467_c0_g1_i1	---NA---	274									IPR016804 (PIRSF); IPR005134 (PFAM); mobidb-lite (MOBIDB_LITE); PTHR31721:SF5 (PANTHER); PTHR31721 (PANTHER); NON_CYTOPLASMIC_DOMAIN (PHOBIUS); TRANSMEMBRANE (PHOBIUS); SIGNAL_PEPTIDE_H_REGION (PHOBIUS); CYTOPLASMIC_DOMAIN (PHOBIUS); CYTOPLASMIC_DOMAIN (PHOBIUS); TRANSMEMBRANE (PHOBIUS); SIGNAL_PEPTIDE_C_REGION (PHOBIUS); SIGNAL_PEPTIDE_N_REGION (PHOBIUS); NON_CYTOPLASMIC_DOMAIN (PHOBIUS); SIGNAL…	no GO terms	no GO terms
TRINITY_DN86982_c0_g3_i3	---NA---	161									no IPS match	no IPS match	no IPS match
TRINITY_DN90504_c0_g1_i4	---NA---	154									IPR029058 (G3DSA:3.40.50.GENE3D); PTHR46438 (PANTHER); IPR029058 (SUPERFAMILY)	no GO terms	no GO terms
TRINITY_DN90599_c3_g1_i2	---NA---	80									no IPS match	no IPS match	no IPS match
TRINITY_DN154877_c0_g1_i1	---NA---	138									mobidb-lite (MOBIDB_LITE); mobidb-lite (MOBIDB_LITE)	no GO terms	no GO terms
TRINITY_DN86201_c0_g1_i6	---NA---	172									mobidb-lite (MOBIDB_LITE); mobidb-lite (MOBIDB_LITE); mobidb-lite (MOBIDB_LITE); mobidb-lite (MOBIDB_LITE); mobidb-lite (MOBIDB_LITE)	no GO terms	no GO terms
TRINITY_DN88319_c0_g2_i5	---NA---	87									mobidb-lite (MOBIDB_LITE); mobidb-lite (MOBIDB_LITE)	no GO terms	no GO terms
TRINITY_DN29855_c0_g1_i1	---NA---	299									IPR026961 (PFAM); PTHR24177:SF218 (PANTHER); PTHR24177 (PANTHER); CYTOPLASMIC_DOMAIN (PHOBIUS); NON_CYTOPLASMIC_DOMAIN (PHOBIUS); CYTOPLASMIC_DOMAIN (PHOBIUS); TRANSMEMBRANE (PHOBIUS); NON_CYTOPLASMIC_DOMAIN (PHOBIUS); TRANSMEMBRANE (PHOBIUS); CYTOPLASMIC_DOMAIN (PHOBIUS); TRANSMEMBRANE (PHOBIUS); TRANSMEMBRANE (PHOBIUS); TMhelix (TMHMM); TMhelix (TMHMM); TMhelix (TMHMM); TMhelix (TMHMM)	no GO terms	no GO terms
TRINITY_DN88159_c0_g1_i3	---NA---	217									IPR025131 (PFAM); PTHR31132:SF2 (PANTHER); PTHR31132 (PANTHER)	no GO terms	no GO terms
TRINITY_DN90694_c6_g5_i2	---NA---	65									PTHR38146 (PANTHER); PTHR38146:SF11 (PANTHER)	no GO terms	no GO terms
TRINITY_DN72282_c0_g1_i1	---NA---	84									no IPS match	no IPS match	no IPS match
TRINITY_DN79266_c1_g1_i3	---NA---	131									IPR003435 (PANTHER); PTHR33791:SF1 (PANTHER); CYTOPLASMIC_DOMAIN (PHOBIUS); SIGNAL_PEPTIDE_C_REGION (PHOBIUS); SIGNAL_PEPTIDE (PHOBIUS); SIGNAL_PEPTIDE_H_REGION (PHOBIUS); TRANSMEMBRANE (PHOBIUS); SIGNAL_PEPTIDE_N_REGION (PHOBIUS); NON_CYTOPLASMIC_DOMAIN (PHOBIUS)	no GO terms	no GO terms
TRINITY_DN57508_c0_g1_i1	---NA---	50									NON_CYTOPLASMIC_DOMAIN (PHOBIUS); CYTOPLASMIC_DOMAIN (PHOBIUS); TRANSMEMBRANE (PHOBIUS); TMhelix (TMHMM)	no GO terms	no GO terms
TRINITY_DN77527_c2_g1_i2	---NA---	81									Coil (COILS)	no GO terms	no GO terms
TRINITY_DN29679_c0_g1_i1	---NA---	214									Coil (COILS)	no GO terms	no GO terms
TRINITY_DN108003_c0_g1_i1	---NA---	46									no IPS match	no IPS match	no IPS match
TRINITY_DN87339_c0_g1_i1	---NA---	43									no IPS match	no IPS match	no IPS match
TRINITY_DN82874_c1_g1_i1	---NA---	64									IPR029068 (G3DSA:3.10.180.GENE3D); PTHR46142 (PANTHER); PTHR46142:SF4 (PANTHER); IPR029068 (SUPERFAMILY)	no GO terms	no GO terms
TRINITY_DN73393_c2_g7_i1	---NA---	117									PTHR31236 (PANTHER); PTHR31236:SF56 (PANTHER); SIGNAL_PEPTIDE (PHOBIUS); SIGNAL_PEPTIDE_N_REGION (PHOBIUS); NON_CYTOPLASMIC_DOMAIN (PHOBIUS); SIGNAL_PEPTIDE_H_REGION (PHOBIUS); SIGNAL_PEPTIDE_C_REGION (PHOBIUS); SignalP-noTM (SIGNALP_GRAM_NEGATIVE); SignalP-TM (SIGNALP_GRAM_POSITIVE); SignalP-noTM (SIGNALP_EUK)	no GO terms	no GO terms
TRINITY_DN83710_c1_g8_i1	---NA---	55									PTHR38146:SF8 (PANTHER); PTHR38146 (PANTHER); CYTOPLASMIC_DOMAIN (PHOBIUS); TRANSMEMBRANE (PHOBIUS); NON_CYTOPLASMIC_DOMAIN (PHOBIUS); TMhelix (TMHMM)	no GO terms	no GO terms
TRINITY_DN79125_c0_g1_i1	---NA---	121									mobidb-lite (MOBIDB_LITE); IPR034577 (PANTHER); PTHR35735:SF5 (PANTHER)	P:GO:0010112	P:regulation of systemic acquired resistance
TRINITY_DN73980_c0_g1_i2	---NA---	268									Coil (COILS); mobidb-lite (MOBIDB_LITE); mobidb-lite (MOBIDB_LITE); mobidb-lite (MOBIDB_LITE); mobidb-lite (MOBIDB_LITE); PTHR33785:SF2 (PANTHER); PTHR33785 (PANTHER)	no GO terms	no GO terms
TRINITY_DN73936_c0_g2_i1	---NA---	115									mobidb-lite (MOBIDB_LITE); mobidb-lite (MOBIDB_LITE); mobidb-lite (MOBIDB_LITE)	no GO terms	no GO terms
TRINITY_DN15112_c0_g2_i1	---NA---	127									PTHR31282 (PANTHER); PTHR31282:SF110 (PANTHER)	no GO terms	no GO terms
TRINITY_DN13420_c0_g1_i1	---NA---	80									no IPS match	no IPS match	no IPS match
TRINITY_DN85194_c1_g1_i9	---NA---	64									no IPS match	no IPS match	no IPS match
TRINITY_DN79513_c1_g1_i4	---NA---	144									CYTOPLASMIC_DOMAIN (PHOBIUS); TRANSMEMBRANE (PHOBIUS); NON_CYTOPLASMIC_DOMAIN (PHOBIUS); CYTOPLASMIC_DOMAIN (PHOBIUS); TRANSMEMBRANE (PHOBIUS); TRANSMEMBRANE (PHOBIUS); NON_CYTOPLASMIC_DOMAIN (PHOBIUS); TMhelix (TMHMM)	no GO terms	no GO terms
TRINITY_DN91060_c0_g1_i1	---NA---	67									TRANSMEMBRANE (PHOBIUS); TRANSMEMBRANE (PHOBIUS); NON_CYTOPLASMIC_DOMAIN (PHOBIUS); CYTOPLASMIC_DOMAIN (PHOBIUS); CYTOPLASMIC_DOMAIN (PHOBIUS); TMhelix (TMHMM); TMhelix (TMHMM)	no GO terms	no GO terms
TRINITY_DN78168_c0_g2_i1	---NA---	64									NON_CYTOPLASMIC_DOMAIN (PHOBIUS); CYTOPLASMIC_DOMAIN (PHOBIUS); TRANSMEMBRANE (PHOBIUS); TMhelix (TMHMM)	no GO terms	no GO terms
TRINITY_DN5874_c0_g1_i1	---NA---	68									no IPS match	no IPS match	no IPS match
TRINITY_DN66042_c0_g2_i1	---NA---	67									TRANSMEMBRANE (PHOBIUS); SIGNAL_PEPTIDE_H_REGION (PHOBIUS); NON_CYTOPLASMIC_DOMAIN (PHOBIUS); SIGNAL_PEPTIDE_C_REGION (PHOBIUS); SIGNAL_PEPTIDE (PHOBIUS); CYTOPLASMIC_DOMAIN (PHOBIUS); SIGNAL_PEPTIDE_N_REGION (PHOBIUS); SignalP-TM (SIGNALP_EUK)	no GO terms	no GO terms
TRINITY_DN83772_c0_g1_i4	---NA---	122									Coil (COILS); Coil (COILS)	no GO terms	no GO terms
TRINITY_DN87380_c0_g1_i2	---NA---	53									no IPS match	no IPS match	no IPS match
TRINITY_DN71860_c0_g1_i1	---NA---	121									Coil (COILS); IPR027329 (PFAM); mobidb-lite (MOBIDB_LITE); mobidb-lite (MOBIDB_LITE); mobidb-lite (MOBIDB_LITE); IPR009675 (PANTHER); PTHR14326:SF39 (PANTHER)	P:GO:0032147; P:GO:0060236; C:GO:0005819; C:GO:0005874	P:activation of protein kinase activity; P:regulation of mitotic spindle organization; C:spindle; C:microtubule
TRINITY_DN86669_c7_g6_i1	---NA---	77									NON_CYTOPLASMIC_DOMAIN (PHOBIUS); TRANSMEMBRANE (PHOBIUS); CYTOPLASMIC_DOMAIN (PHOBIUS)	no GO terms	no GO terms
TRINITY_DN70556_c0_g1_i3	---NA---	165									PTHR15157:SF23 (PANTHER); PTHR15157 (PANTHER); IPR036412 (SUPERFAMILY)	no GO terms	no GO terms
TRINITY_DN82364_c0_g1_i1	---NA---	283									IPR025322 (PFAM); mobidb-lite (MOBIDB_LITE); mobidb-lite (MOBIDB_LITE); mobidb-lite (MOBIDB_LITE); mobidb-lite (MOBIDB_LITE); PTHR33052 (PANTHER); PTHR33052:SF91 (PANTHER)	no GO terms	no GO terms
TRINITY_DN81699_c0_g1_i1	---NA---	88									no IPS match	no IPS match	no IPS match
TRINITY_DN7577_c0_g1_i1	---NA---	127									NON_CYTOPLASMIC_DOMAIN (PHOBIUS); CYTOPLASMIC_DOMAIN (PHOBIUS); TRANSMEMBRANE (PHOBIUS); TMhelix (TMHMM)	no GO terms	no GO terms
TRINITY_DN84834_c2_g3_i7	---NA---	150									PTHR43329:SF109 (PANTHER); PTHR43329 (PANTHER); CYTOPLASMIC_DOMAIN (PHOBIUS); TRANSMEMBRANE (PHOBIUS); NON_CYTOPLASMIC_DOMAIN (PHOBIUS)	no GO terms	no GO terms
TRINITY_DN82992_c1_g1_i6	---NA---	125									no IPS match	no IPS match	no IPS match
TRINITY_DN67578_c0_g1_i1	---NA---	44									no IPS match	no IPS match	no IPS match
TRINITY_DN92403_c1_g1_i3	---NA---	43									no IPS match	no IPS match	no IPS match
TRINITY_DN101767_c0_g1_i1	---NA---	57									no IPS match	no IPS match	no IPS match
TRINITY_DN88474_c1_g3_i1	---NA---	42									no IPS match	no IPS match	no IPS match
TRINITY_DN82894_c0_g1_i1	---NA---	61									no IPS match	no IPS match	no IPS match
TRINITY_DN121931_c0_g1_i1	---NA---	41									CYTOPLASMIC_DOMAIN (PHOBIUS); NON_CYTOPLASMIC_DOMAIN (PHOBIUS); TRANSMEMBRANE (PHOBIUS); TMhelix (TMHMM)	no GO terms	no GO terms
TRINITY_DN28116_c0_g1_i1	---NA---	193									mobidb-lite (MOBIDB_LITE); PTHR33985 (PANTHER); PTHR33985:SF2 (PANTHER); SIGNAL_PEPTIDE_H_REGION (PHOBIUS); SIGNAL_PEPTIDE_N_REGION (PHOBIUS); NON_CYTOPLASMIC_DOMAIN (PHOBIUS); SIGNAL_PEPTIDE_C_REGION (PHOBIUS); SIGNAL_PEPTIDE (PHOBIUS); IPR036378 (SUPERFAMILY)	no GO terms	no GO terms
TRINITY_DN90003_c3_g4_i4	---NA---	77									TRANSMEMBRANE (PHOBIUS); NON_CYTOPLASMIC_DOMAIN (PHOBIUS); CYTOPLASMIC_DOMAIN (PHOBIUS)	no GO terms	no GO terms
TRINITY_DN89839_c3_g2_i3	---NA---	153									NON_CYTOPLASMIC_DOMAIN (PHOBIUS); CYTOPLASMIC_DOMAIN (PHOBIUS); NON_CYTOPLASMIC_DOMAIN (PHOBIUS); TRANSMEMBRANE (PHOBIUS); CYTOPLASMIC_DOMAIN (PHOBIUS); TRANSMEMBRANE (PHOBIUS); TRANSMEMBRANE (PHOBIUS); TRANSMEMBRANE (PHOBIUS); CYTOPLASMIC_DOMAIN (PHOBIUS); TMhelix (TMHMM); TMhelix (TMHMM); TMhelix (TMHMM); TMhelix (TMHMM)	no GO terms	no GO terms
TRINITY_DN75515_c0_g2_i1	---NA---	40									no IPS match	no IPS match	no IPS match
TRINITY_DN81481_c0_g1_i3	---NA---	473									IPR007789 (PFAM); mobidb-lite (MOBIDB_LITE); mobidb-lite (MOBIDB_LITE); mobidb-lite (MOBIDB_LITE); PTHR33671:SF2 (PANTHER); PTHR33671 (PANTHER)	no GO terms	no GO terms
TRINITY_DN80553_c0_g1_i4	---NA---	94									no IPS match	no IPS match	no IPS match
TRINITY_DN90003_c3_g4_i6	---NA---	77									TRANSMEMBRANE (PHOBIUS); NON_CYTOPLASMIC_DOMAIN (PHOBIUS); CYTOPLASMIC_DOMAIN (PHOBIUS)	no GO terms	no GO terms
TRINITY_DN85969_c1_g2_i1	---NA---	618									mobidb-lite (MOBIDB_LITE); mobidb-lite (MOBIDB_LITE); mobidb-lite (MOBIDB_LITE); mobidb-lite (MOBIDB_LITE); mobidb-lite (MOBIDB_LITE); mobidb-lite (MOBIDB_LITE); mobidb-lite (MOBIDB_LITE); mobidb-lite (MOBIDB_LITE); mobidb-lite (MOBIDB_LITE); mobidb-lite (MOBIDB_LITE); mobidb-lite (MOBIDB_LITE); mobidb-lite (MOBIDB_LITE); mobidb-lite (MOBIDB_LITE); mobidb-lite (MOBIDB_LITE); mobidb-lite (MOBIDB_L…	no GO terms	no GO terms

## Sheet: B
Enzyme Codes	GO Names
	C:basal plasma membrane
	C:cytosol; C:plasma membrane; C:centriolar satellite
	F:protein binding; C:integral component of membrane
EC:1.1.2.4; EC:1.1.99.39; EC:2.5.1.26; EC:1.1.3.15; EC:1.1.99.14; EC:1.1.99.6; EC:1.1.1.28; EC:1.1.99.2	P:2-oxoglutarate metabolic process; P:ATP biosynthetic process; P:cellular response to DNA damage stimulus; P:ether lipid biosynthetic process; P:response to manganese ion; P:response to zinc ion; P:response to cobalt ion; P:response to magnesium ion; P:cellular protein metabolic process; P:glycolate catabolic process; P:response to calcium ion; P:methylglyoxal catabolic process; P:oxidation-redu…
	P:abscission; P:protein transport; P:viral release from host cell; P:multivesicular body assembly; P:neutrophil degranulation; P:positive regulation of proteolysis; P:viral capsid secondary envelopment; P:positive regulation of collateral sprouting; P:cytoskeleton-dependent cytokinesis; P:ESCRT III complex disassembly; F:identical protein binding; F:protein-containing complex binding; F:MIT domai…
	P:activation of immune response; P:defense response; P:alkaloid metabolic process; P:response to zinc ion; F:carbon-oxygen lyase activity; F:protein homodimerization activity; C:chloroplast
EC:2.7.11.25; EC:2.7.11; EC:2.7.11.24	P:activation of MAPKK activity; P:activation of MAPK activity; P:actomyosin contractile ring assembly; P:cell plate assembly; P:pattern recognition receptor signaling pathway; P:regulation of transcription, DNA-templated; P:response to oxidative stress; P:response to wounding; P:cold acclimation; P:response to salt stress; P:suspensor development; P:stomatal complex morphogenesis; P:inflorescence…
	P:amino acid transmembrane transport; P:defense response; P:vacuolar transport; P:neurotransmitter secretion; P:aging; P:aromatic amino acid transport; P:gamma-aminobutyric acid transport; P:glycine transport; P:proline transport; P:hippocampus development; P:amino acid import; P:response to karrikin; P:neurotransmitter loading into synaptic vesicle; F:L-tyrosine transmembrane transporter activit…
	P:amino acid transport; C:vacuolar membrane; C:plasma membrane; C:integral component of membrane
EC:1.6.3.1; EC:1.11.1.7	P:angiogenesis; P:respiratory burst involved in defense response; P:thyroid hormone generation; P:NADP metabolic process; P:ion transport; P:inflammatory response; P:response to oxidative stress; P:osmosensory signaling pathway; P:regulation of blood pressure; P:aerobic respiration; P:response to heat; P:fertilization; P:response to virus; P:abscisic acid-activated signaling pathway; P:seed germi…
	P:apoptotic process; P:brain development; P:cell population proliferation; P:neutrophil degranulation; P:positive regulation of cellular senescence; F:protein binding; F:metal ion binding; C:ubiquitin ligase complex; C:extracellular region; C:nucleolus; C:centrosome; C:midbody; C:mitotic spindle pole; C:tertiary granule lumen; C:ficolin-1-rich granule lumen
EC:3.4.22; EC:3.4.22.1; EC:3.4.99; EC:3.4.22.41; EC:3.4.22.40; EC:3.4.22.34; EC:3.4.22.8; EC:3.4.22.28; EC:3.4.22.16; EC:3.4.22.27; EC:3.4.22.38; EC:3.4.22.15; EC:3.4.22.14	P:attachment of GPI anchor to protein; F:GPI-anchor transamidase activity; F:protein binding; C:GPI-anchor transamidase complex
EC:3.6.1.3; EC:3.6.4.13; EC:2.7.7.7; EC:2.7.7.19; EC:3.6.1.15	P:base-excision repair; P:double-strand break repair; P:rRNA processing; P:mRNA polyadenylation; P:tRNA modification; P:sister chromatid cohesion; P:mitotic chromosome condensation; P:multicellular organism development; P:miRNA catabolic process; P:heterochromatin assembly by small RNA; P:negative regulation of telomere maintenance via telomerase; P:carbohydrate homeostasis; P:U4 snRNA 3'-end pro…
	P:biological_process; F:molecular_function; C:cellular_component
	P:blue light signaling pathway; P:response to karrikin; F:protein binding; C:nucleus
EC:3.4.17.11; EC:3.4.17.22; EC:3.4.17.10; EC:3.4.17.21; EC:3.4.17; EC:3.4.17.2; EC:3.4.17.1; EC:3.4.17.17; EC:3.4.17.6; EC:3.4.17.4; EC:3.4.17.3	P:cardiac left ventricle morphogenesis; P:bradykinin catabolic process; P:Wnt signaling pathway; P:insulin processing; P:peptide hormone secretion; P:regulation of complement activation; P:protein localization to secretory granule; P:enkephalin processing; P:response to glucocorticoid; P:cellular response to interleukin-2; P:protein localization to membrane; P:negative regulation of branching mor…
EC:2.7.7.15	P:CDP-choline pathway; F:choline-phosphate cytidylyltransferase activity; F:phosphatidylcholine binding
EC:2.4.1.43	P:cell adhesion; P:pollen development; P:pollen tube growth; P:homogalacturonan biosynthetic process; P:glucuronoxylan biosynthetic process; P:mucilage pectin biosynthetic process; P:mucilage extrusion from seed coat; F:polygalacturonate 4-alpha-galacturonosyltransferase activity; C:Golgi cis cisterna; C:Golgi membrane; C:mitochondrion; C:endosome; C:trans-Golgi network; C:integral component of m…
	P:cell adhesion; P:response to salt stress; P:abscisic acid-activated signaling pathway; P:multidimensional cell growth; P:plant-type secondary cell wall biogenesis; P:mucilage biosynthetic process involved in seed coat development; F:polysaccharide binding; C:plasmodesma; C:external side of plasma membrane; C:anchored component of plasma membrane
	P:cell redox homeostasis; C:chloroplast
EC:1.1.1.95	P:cellular amino acid metabolic process; P:oxidation-reduction process; F:phosphoglycerate dehydrogenase activity; C:integral component of membrane
	P:cellular calcium ion homeostasis; P:defense response; P:response to bacterium; P:response to fungus; P:pollen tube growth; P:nodulation; P:calcium-mediated signaling; P:arbuscular mycorrhizal association; P:response to cadmium ion; P:calcium ion transmembrane transport; P:potassium ion transmembrane transport; P:response to herbivore; F:intracellular cGMP-activated cation channel activity; F:vo…
	P:cellular copper ion homeostasis; P:defense response; P:carbohydrate transmembrane transport; P:pollen sperm cell differentiation; P:root development; P:copper ion import across plasma membrane; F:high-affinity copper ion transmembrane transporter activity; F:protein self-association; F:sugar transmembrane transporter activity; C:vacuole; C:integral component of plasma membrane
	P:cellular metal ion homeostasis; P:protein transport; P:vacuole fusion, non-autophagic; P:regulation of vacuole organization; P:cell redox homeostasis; P:pollen sperm cell differentiation; P:positive regulation of monopolar cell growth; P:iron ion homeostasis; P:regulation of phospholipid translocation; P:response to karrikin; P:glutathione import across plasma membrane; P:tetrapeptide transmemb…
	P:cellular response to copper ion starvation; P:defense response to bacterium; P:positive regulation of transcription, DNA-templated; P:regulation of developmental growth; F:transcription regulatory region sequence-specific DNA binding; F:DNA-binding transcription factor activity; F:protein homodimerization activity; F:metal ion binding; C:cytoplasm; C:plasma membrane; C:nuclear speck; C:host cel…
EC:2.1.1.13; EC:2.1.1.280; EC:2.1.1.5	P:cellular response to DNA damage stimulus; P:methionine biosynthetic process; P:response to selenium ion; P:methylation; P:S-methylmethionine cycle; P:pteridine-containing compound metabolic process; P:S-adenosylhomocysteine metabolic process; P:homocysteine metabolic process; F:zinc ion binding; F:methionine synthase activity; F:S-adenosylmethionine-homocysteine S-methyltransferase activity; F:…
	P:chloroplast organization; P:cytokinin-activated signaling pathway; P:ethylene-activated signaling pathway; P:negative regulation of flower development; P:regulation of root meristem growth; P:regulation of stomatal movement; P:regulation of chlorophyll biosynthetic process; P:positive regulation of organelle organization; P:positive regulation of circadian rhythm; P:positive regulation of trans…
	P:circadian rhythm; P:chloroplast organization; P:blue light signaling pathway; P:regulation of flower development; P:regulation of photomorphogenesis; P:red light signaling pathway; P:response to chitin; P:response to UV-B; P:negative regulation of transcription, DNA-templated; P:negative regulation of long-day photoperiodism, flowering; F:transcription regulatory region sequence-specific DNA bi…
EC:1.15.1.1	P:circadian rhythm; P:response to UV; P:response to light intensity; P:response to ozone; P:removal of superoxide radicals; P:response to cadmium ion; P:response to copper ion; P:oxidation-reduction process; F:superoxide dismutase activity; F:protein domain specific binding; F:metal ion binding; C:mitochondrion; C:cytosol; C:plasma membrane; C:chloroplast thylakoid; C:chloroplast envelope; C:chlo…
	P:circadian rhythm; P:shade avoidance; P:chloroplast organization; P:blue light signaling pathway; P:regulation of flower development; P:far-red light signaling pathway; P:regulation of photomorphogenesis; P:red light signaling pathway; P:response to chitin; P:secondary shoot formation; P:response to UV-B; P:cell differentiation; P:negative regulation of transcription, DNA-templated; P:positive r…
	P:circadian rhythm; P:shade avoidance; P:chloroplast organization; P:blue light signaling pathway; P:regulation of flower development; P:far-red light signaling pathway; P:regulation of photomorphogenesis; P:red light signaling pathway; P:response to chitin; P:secondary shoot formation; P:response to UV-B; P:cell differentiation; P:negative regulation of transcription, DNA-templated; P:positive r…
EC:1.8.4.9; EC:1.8.99.2; EC:1.8.4.8	P:cysteine biosynthetic process; P:sulfate assimilation, phosphoadenylyl sulfate reduction by phosphoadenylyl-sulfate reductase (thioredoxin); F:phosphoadenylyl-sulfate reductase (thioredoxin) activity; F:protein binding; F:adenylyl-sulfate reductase activity; F:adenylyl-sulfate reductase (glutathione) activity; F:metal ion binding; F:4 iron, 4 sulfur cluster binding; C:chloroplast thylakoid; C:c…
EC:1.8.4.9; EC:1.8.99.2; EC:1.8.4.8; EC:1.8.4.10	P:cysteine biosynthetic process; P:sulfate assimilation, phosphoadenylyl sulfate reduction by phosphoadenylyl-sulfate reductase (thioredoxin); P:hydrogen sulfide biosynthetic process; F:phosphoadenylyl-sulfate reductase (thioredoxin) activity; F:protein binding; F:adenylyl-sulfate reductase activity; F:adenylyl-sulfate reductase (glutathione) activity; F:adenylyl-sulfate reductase (thioredoxin) a…
EC:1.8.4.9; EC:1.8.99.2; EC:1.8.4.8; EC:1.8.4.10	P:cysteine biosynthetic process; P:sulfate assimilation, phosphoadenylyl sulfate reduction by phosphoadenylyl-sulfate reductase (thioredoxin); P:hydrogen sulfide biosynthetic process; F:phosphoadenylyl-sulfate reductase (thioredoxin) activity; F:protein binding; F:adenylyl-sulfate reductase activity; F:adenylyl-sulfate reductase (glutathione) activity; F:adenylyl-sulfate reductase (thioredoxin) a…
	P:cytoplasmic translation; P:poly(A)+ mRNA export from nucleus; P:cytokine-mediated signaling pathway; P:positive regulation of GTPase activity; F:DNA binding; F:protein binding; F:metal ion binding; C:nucleolus; C:cytosol
EC:4.3.1.17; EC:4.3.1.19	P:defense response to insect; P:L-serine catabolic process; P:threonine catabolic process; P:isoleucine biosynthetic process; P:pathogenesis; P:response to insect; P:positive regulation of defense response; P:protein homotetramerization; P:response to herbivore; F:L-serine ammonia-lyase activity; F:L-threonine ammonia-lyase activity; F:amino acid binding; F:pyridoxal phosphate binding; F:identica…
EC:4.3.1.17; EC:4.3.1.19	P:defense response to insect; P:L-serine catabolic process; P:threonine catabolic process; P:isoleucine biosynthetic process; P:response to wounding; P:response to insect; P:response to abscisic acid; P:response to jasmonic acid; P:positive regulation of defense response; P:protein homotetramerization; P:response to herbivore; F:L-serine ammonia-lyase activity; F:L-threonine ammonia-lyase activit…
EC:1.14.14.82; EC:1.14.14.81; EC:1.14.14.97; EC:1.14.13; EC:1.14.14.98	P:defense response to insect; P:response to bacterium; P:anthocyanin-containing compound biosynthetic process; P:response to auxin; P:terpenoid biosynthetic process; P:isoquinoline alkaloid biosynthetic process; P:terpene biosynthetic process; P:defense response to fungus; P:oxidation-reduction process; P:cellular response to iron ion; P:cellular response to hypoxia; P:sideretin biosynthesis; P:n…
EC:1.14.15.3; EC:1.14.14.1; EC:1.14.15; EC:1.14.14; EC:1.14.13	P:defense response to insect; P:response to wounding; P:jasmonic acid metabolic process; P:alkaloid metabolic process; P:wax biosynthetic process; P:fruit development; P:suberin biosynthetic process; P:long-chain fatty-acyl-CoA metabolic process; P:very long-chain fatty acid biosynthetic process; P:stigma development; P:anther development; P:oxidation-reduction process; P:cell wall organization; …
	P:defense response to nematode; P:defense response to oomycetes; P:response to nematode; P:response to insect; P:abscisic acid-activated signaling pathway; P:defense response to bacterium, incompatible interaction; P:systemic acquired resistance, salicylic acid mediated signaling pathway; P:induced systemic resistance, jasmonic acid mediated signaling pathway; P:regulation of ethylene-activated s…
EC:2.7.11; EC:2.7.11.30	P:defense response to nematode; P:water transport; P:receptor-mediated endocytosis; P:transmembrane receptor protein serine/threonine kinase signaling pathway; P:response to wounding; P:brassinosteroid mediated signaling pathway; P:embryo development ending in seed dormancy; P:multidimensional cell growth; P:seed germination; P:regulation of meristem structural organization; P:regulation of root …
EC:1.14.11; EC:1.14.20.6; EC:1.14.11.9; EC:1.14.13; EC:1.14.11.31; EC:1.14.20.5; EC:1.14.11.32	P:defense response to oomycetes; P:response to flooding; P:response to fungus; P:response to red or far red light; P:gibberellin biosynthetic process; P:gibberellic acid mediated signaling pathway; P:response to salicylic acid; P:unidimensional cell growth; P:flower development; P:leaf senescence; P:methylation; P:regulation of growth; P:defense response to bacterium; P:salicylic acid catabolic p…
EC:3.6.1.3; EC:3.6.1.15	P:defense response to oomycetes; P:response to heat; P:response to cold; P:response to ethylene; P:abscisic acid-activated signaling pathway; P:response to salicylic acid; P:response to jasmonic acid; P:hormone transport; P:response to ozone; P:intercellular transport; P:lead ion transport; P:cuticle development; P:cellular response to water deprivation; P:xenobiotic transport; P:negative regulat…
	P:defense response to oomycetes; P:response to salt stress; P:chloroplast organization; P:regulation of flower development; P:cellular response to sulfur starvation; P:regulation of defense response; P:defense response to bacterium; P:positive regulation of transcription, DNA-templated; P:regulation of response to osmotic stress; P:regulation of short-day photoperiodism, flowering; P:cellular oxi…
	P:defense response to oomycetes; P:response to salt stress; P:chloroplast organization; P:regulation of flower development; P:cellular response to sulfur starvation; P:regulation of defense response; P:defense response to bacterium; P:positive regulation of transcription, DNA-templated; P:regulation of response to osmotic stress; P:regulation of short-day photoperiodism, flowering; P:cellular oxi…
	P:defense response; F:ATP binding; F:ADP binding
	P:defense response; F:ATP binding; F:ADP binding
EC:1.14.13; EC:4.99.1.6; EC:1.14.14.141	P:defense response; P:fruit ripening; P:terpenoid biosynthetic process; P:indole alkaloid biosynthetic process; P:sesquiterpene biosynthetic process; P:oxidation-reduction process; F:iron ion binding; F:protein binding; F:heme binding; F:indoleacetaldoxime dehydratase activity; F:parthenolide 3beta-hydroxylase activity; F:costunolide 3beta-hydroxylase activity; F:psoralen synthase activity; C:end…
EC:1.14.13; EC:4.99.1.6	P:defense response; P:fruit ripening; P:terpenoid biosynthetic process; P:indole alkaloid biosynthetic process; P:sesquiterpene biosynthetic process; P:oxidation-reduction process; F:iron ion binding; F:protein binding; F:heme binding; F:indoleacetaldoxime dehydratase activity; F:parthenolide 3beta-hydroxylase activity; F:costunolide 3beta-hydroxylase activity; C:endoplasmic reticulum membrane; C…
EC:4.2.3.54; EC:4.2.3.35; EC:4.2.3.50; EC:4.2.3.30; EC:4.2.3.53; EC:4.2.3.29; EC:4.2.3.19; EC:4.2.3.28	P:defense response; P:gibberellin biosynthetic process; P:gibberellic acid mediated signaling pathway; P:diterpene phytoalexin biosynthetic process; P:copal-8-ol diphosphate(3-) catabolic process; P:cis-abienol biosynthetic process; F:magnesium ion binding; F:ent-kaurene synthase activity; F:hydrolase activity; F:ent-cassa-12,15-diene synthase activity; F:syn-pimara-7,15-diene synthase activity; …
EC:4.2.3.54; EC:4.2.3.33; EC:4.2.3.35; EC:4.2.3.50; EC:4.2.3.30; EC:4.2.3.53; EC:4.2.3.29; EC:4.2.3.19; EC:4.2.3.28	P:defense response; P:gibberellin biosynthetic process; P:gibberellic acid mediated signaling pathway; P:diterpene phytoalexin biosynthetic process; P:copal-8-ol diphosphate(3-) catabolic process; P:cis-abienol biosynthetic process; F:magnesium ion binding; F:ent-kaurene synthase activity; F:hydrolase activity; F:ent-cassa-12,15-diene synthase activity; F:stemar-13-ene synthase activity; F:syn-pi…
EC:2.7.11	P:defense response; P:protein autophosphorylation; P:recognition of pollen; F:protein serine/threonine kinase activity; F:calmodulin binding; F:ATP binding; F:carbohydrate binding; F:ubiquitin protein ligase binding; C:plasma membrane; C:plasmodesma; C:glyoxysome; C:integral component of membrane
	P:defense response; P:response to water deprivation; P:response to fungus; P:response to salt stress; P:plant-type cell wall modification; P:plant-type secondary cell wall biogenesis; P:cellulose biosynthetic process; P:pectin biosynthetic process; P:xylan biosynthetic process; P:positive regulation of transcription, DNA-templated; P:response to freezing; P:xylan acetylation; F:xylan O-acetyltran…
EC:1.3.1.42; EC:1.6.99.1	P:defense response; P:response to wounding; P:response to fungus; P:jasmonic acid biosynthetic process; P:response to ozone; P:oxylipin biosynthetic process; P:stamen development; P:oxidation-reduction process; F:NADPH dehydrogenase activity; F:FMN binding; F:12-oxophytodienoate reductase activity; F:pentaerythritol trinitrate reductase activity; F:identical protein binding; C:peroxisome; C:cytos…
	P:defense response; P:signal transduction; P:regulation of pollen tube growth; F:RNA binding; F:protein binding; C:nucleus; C:chloroplast
EC:1.14.13; EC:4.99.1.6; EC:1.14.14.141	P:defense response; P:terpenoid biosynthetic process; P:indole alkaloid biosynthetic process; P:sesquiterpene biosynthetic process; P:oxidation-reduction process; F:iron ion binding; F:protein binding; F:heme binding; F:indoleacetaldoxime dehydratase activity; F:parthenolide 3beta-hydroxylase activity; F:costunolide 3beta-hydroxylase activity; F:psoralen synthase activity; C:endoplasmic reticulum…
EC:2.7.10; EC:2.7.10.1; EC:2.7.11; EC:2.7.11.30	P:defense response; P:transmembrane receptor protein serine/threonine kinase signaling pathway; P:homeostasis of number of meristem cells; P:detection of brassinosteroid stimulus; P:brassinosteroid mediated signaling pathway; P:leaf senescence; P:response to chitin; P:peptidyl-tyrosine phosphorylation; P:protein autophosphorylation; P:recognition of pollen; P:anther development; P:negative regula…
EC:1.14.13; EC:1.14.14.37	P:dhurrin biosynthetic process; P:heat acclimation; P:oxidation-reduction process; F:iron ion binding; F:protein binding; F:heme binding; F:4-hydroxyphenylacetaldehyde oxime monooxygenase activity; C:endoplasmic reticulum membrane; C:plasma membrane; C:integral component of membrane
EC:2.3.1.43; EC:3.1.1.32; EC:3.1.1.5; EC:2.3.1.158; EC:3.1.1.1; EC:2.3.1.149; EC:3.1.1.4	P:diacylglycerol biosynthetic process; P:phosphatidylcholine biosynthetic process; P:ceramide metabolic process; P:cholesterol metabolic process; P:fatty acid catabolic process; P:leaf senescence; P:positive regulation of lipid storage; P:sterol catabolic process; P:triglyceride biosynthetic process; P:cholesterol transport; P:very-low-density lipoprotein particle remodeling; P:high-density lipop…
EC:3.1.30; EC:3.6.1.3; EC:3.1.21; EC:3.6.4.12; EC:3.6.4.13; EC:3.1.25; EC:3.6.1.15	P:DNA replication checkpoint; P:negative regulation of transcription by RNA polymerase II; P:nuclear-transcribed mRNA catabolic process, endonucleolytic cleavage-dependent decay; P:DNA double-strand break processing; P:mitochondrial DNA replication; P:base-excision repair; P:DNA recombination; P:mRNA export from nucleus; P:regulation of translational termination; P:intracellular mRNA localization…
EC:3.1.30; EC:3.6.1.3; EC:3.1.21; EC:3.6.4.12; EC:3.6.4.13; EC:3.1.25; EC:3.6.1.15	P:DNA replication checkpoint; P:negative regulation of transcription by RNA polymerase II; P:nuclear-transcribed mRNA catabolic process, endonucleolytic cleavage-dependent decay; P:DNA double-strand break processing; P:mitochondrial DNA replication; P:base-excision repair; P:DNA recombination; P:mRNA export from nucleus; P:regulation of translational termination; P:intracellular mRNA localization…
	P:DNA replication; P:response to heat; P:protein refolding; P:chaperone cofactor-dependent protein refolding; F:bent DNA binding; F:ATP binding; F:zinc ion binding; F:heat shock protein binding; F:quinone binding; F:unfolded protein binding; F:chaperone binding; C:cytosol; C:nucleoid; C:chloroplast thylakoid membrane; C:NAD(P)H dehydrogenase complex (plastoquinone); C:integral component of membra…
	P:DNA replication; P:rRNA processing; P:response to heat; P:regulation of isopentenyl diphosphate biosynthetic process, methylerythritol 4-phosphate pathway; P:actin cytoskeleton organization; P:extracellular matrix organization; P:positive regulation of ATPase activity; P:regulation of protein localization; P:protein localization to nucleus; P:protein refolding; P:negative regulation of cysteine…
	P:embryo development ending in seed dormancy; P:pollen tube growth; P:suspensor development; P:gibberellic acid homeostasis; P:response to acidic pH; P:pollen exine formation; P:protein transport; P:oligopeptide transmembrane transport; P:nitrate assimilation; P:dipeptide transport; P:tripeptide transport; P:cellular response to nitrogen levels; P:cellular response to salt stress; P:response to k…
	P:epithelial cell development; P:regulation of systemic arterial blood pressure; P:protein targeting to vacuole; P:chloride transport; P:spermatogenesis; P:blood coagulation; P:circadian rhythm; P:response to water deprivation; P:response to carbon dioxide; P:response to alkaline pH; P:response to acidic pH; P:regulation of gene expression; P:response to activity; P:bicarbonate transport; P:plasm…
	P:ethanol metabolic process; P:negative regulation of cellular process; P:mitochondrial ribosome assembly; P:positive regulation of mitochondrial translation; F:protein binding; C:mitochondrial inner membrane; C:mitochondrial large ribosomal subunit; C:integral component of peroxisomal membrane
EC:2.3.1.85; EC:3.1.2.14; EC:3.1.2.21	P:fatty acid biosynthetic process; F:acyl carrier activity; F:oleoyl-[acyl-carrier-protein] hydrolase activity; F:myristoyl-[acyl-carrier-protein] hydrolase activity; F:palmitoyl-[acyl-carrier-protein] hydrolase activity; F:dodecanoyl-[acyl-carrier-protein] hydrolase activity; C:chloroplast
EC:6.2.1.1; EC:6.2.1.17	P:fatty acid metabolic process; P:auxin metabolic process; P:peptidyl-lysine acetylation; P:post-translational protein acetylation; P:acetate catabolic process; F:acetate-CoA ligase activity; F:adenyl ribonucleotide binding; F:protein deacetylase activity; F:anion binding; F:cation binding; F:propionate-CoA ligase activity; C:peroxisome; C:cytosol
EC:3.1.1.49; EC:3.2.1.51; EC:3.1.1.6; EC:3.1.1.8; EC:3.1.1.1	P:fatty acid metabolic process; P:systemic acquired resistance; P:lipid catabolic process; F:cholinesterase activity; F:alpha-L-fucosidase activity; F:acetylesterase activity; F:lipase activity; F:IgE binding; F:sinapine esterase activity; C:vacuole; C:plant-type cell wall; C:plasmodesma; C:chloroplast stroma; C:apoplast
	P:flavonoid biosynthetic process; P:proanthocyanidin biosynthetic process; P:maintenance of seed dormancy; P:auxin homeostasis; P:xenobiotic transport; P:root hair elongation; P:response to karrikin; P:proton transmembrane transport; F:solute:proton antiporter activity; F:xenobiotic transmembrane transporter activity; C:plasma membrane; C:plant-type vacuole membrane; C:integral component of membr…
EC:3.6.1.3; EC:3.6.4.13; EC:3.6.1.15	P:generation of catalytic spliceosome for first transesterification step; P:spliceosomal complex disassembly; P:translational initiation; P:germ cell development; P:embryo development ending in seed dormancy; P:embryonic body morphogenesis; P:positive regulation of type I interferon production; P:snoRNA splicing; P:post-transcriptional gene silencing by RNA; P:feminization of hermaphroditic germ-…
EC:2.6.1.44; EC:4.2.3.2; EC:2.6.1.40; EC:2.6.1.62; EC:4.1.1.64	P:glycerol metabolic process; P:lysine catabolic process; P:phosphatidylethanolamine biosynthetic process; P:biotin biosynthetic process; P:glyoxylate catabolic process; P:photorespiration; P:glycine biosynthetic process, by transamination of glyoxylate; P:L-alanine catabolic process, by transamination; P:collagen catabolic process; P:response to nicotine; P:embryonic hemopoiesis; P:cellular resp…
	P:glycosphingolipid metabolic process; P:lipid transport; P:intracellular protein transport; P:biological_process; P:pollen development; P:positive regulation of GTPase activity; P:endoplasmic reticulum-plasma membrane tethering; F:GTPase activator activity; F:calcium ion binding; F:protein binding; F:phospholipid binding; F:calcium-dependent phospholipid binding; F:lipid binding; F:phosphatidyle…
EC:1.1.1.205	P:GMP biosynthetic process; P:cell redox homeostasis; P:oxidation-reduction process; F:nucleotide binding; F:IMP dehydrogenase activity; F:metal ion binding; C:chloroplast stroma
EC:2.7.4.4; EC:2.7.4.8	P:GTP biosynthetic process; P:dGDP biosynthetic process; P:xenobiotic metabolic process; P:nucleobase-containing small molecule interconversion; P:GDP-mannose metabolic process; P:glycoprotein transport; P:ATP metabolic process; P:GMP metabolic process; P:dGMP metabolic process; P:dATP metabolic process; P:GDP biosynthetic process; P:nucleotide phosphorylation; P:nucleoside monophosphate phosphor…
EC:4.99.1.1	P:heme biosynthetic process; P:response to oxidative stress; F:ferrochelatase activity; C:mitochondrion; C:chloroplast thylakoid membrane; C:chloroplast membrane
EC:3.1.3.19; EC:3.1.3.25; EC:3.1.3.23; EC:3.1.3.11	P:inositol biosynthetic process; P:phosphatidylinositol biosynthetic process; P:signal transduction; P:response to lithium ion; P:L-ascorbic acid biosynthetic process; P:phosphatidylinositol phosphorylation; P:inositol phosphate dephosphorylation; F:magnesium ion binding; F:inositol monophosphate 1-phosphatase activity; F:L-galactose-1-phosphate phosphatase activity; F:manganese ion binding; F:li…
EC:3.2.1.55; EC:3.2.1.37	P:iron ion transport; P:cellular iron ion homeostasis; P:systemic acquired resistance; P:seed coat development; P:arabinan catabolic process; P:xylan catabolic process; F:ferric iron binding; F:xylan 1,4-beta-xylosidase activity; F:alpha-L-arabinofuranosidase activity; C:vacuolar membrane; C:plant-type cell wall; C:plasmodesma; C:chloroplast; C:apoplast
	P:iron ion transport; P:regulation of abscisic acid-activated signaling pathway; P:seed germination; P:response to manganese ion; P:cellular manganese ion homeostasis; P:response to copper ion; P:seed development; P:manganese ion transmembrane transport; P:sequestering of iron ion; P:proton transmembrane transport; P:regulation of jasmonic acid mediated signaling pathway; P:regulation of salicyli…
	P:leaf senescence; P:vegetative to reproductive phase transition of meristem; P:cellular response to oxidative stress; P:reactive oxygen species metabolic process; C:chloroplast
EC:1.1.1.305; EC:2.1.2.13	P:lipopolysaccharide biosynthetic process; P:lipid A biosynthetic process; P:response to antibiotic; P:oxidation-reduction process; P:cell wall organization; F:UDP-glucuronic acid dehydrogenase activity; F:UDP-4-amino-4-deoxy-L-arabinose formyltransferase activity; C:cytosol
EC:3.1.30; EC:3.1.26	P:male meiotic nuclear division; P:female meiotic nuclear division; P:megagametogenesis; P:response to auxin; P:post-embryonic development; P:defense response, incompatible interaction; P:auxin metabolic process; P:regulation of meristem structural organization; P:RNA secondary structure unwinding; P:miRNA metabolic process; P:pre-miRNA processing; P:histone H3-K9 demethylation; P:somatic stem ce…
EC:3.2.1.20; EC:3.2.1.21; EC:3.2.1.177; EC:3.2.1.55; EC:3.2.1.37	P:maltose metabolic process; P:regulation of the force of heart contraction; P:diaphragm contraction; P:heart morphogenesis; P:glycogen catabolic process; P:starch catabolic process; P:sucrose metabolic process; P:lysosome organization; P:locomotory behavior; P:tissue development; P:xyloglucan metabolic process; P:vacuolar sequestering; P:neutrophil degranulation; P:xylan catabolic process; P:res…
EC:3.2.1.20; EC:3.2.1.84	P:maltose metabolic process; P:regulation of the force of heart contraction; P:diaphragm contraction; P:heart morphogenesis; P:glycogen catabolic process; P:sucrose metabolic process; P:glucose metabolic process; P:protein folding; P:N-glycan processing; P:lysosome organization; P:locomotory behavior; P:unidimensional cell growth; P:tissue development; P:cellulose biosynthetic process; P:sorocarp…
EC:3.2.2.6	P:MAPK cascade; P:cell morphogenesis; P:cell fate specification; P:establishment of imaginal disc-derived wing hair orientation; P:pole plasm protein localization; P:dorsal closure; P:R3/R4 cell fate commitment; P:memory; P:response to light stimulus; P:response to auxin; P:defense response to bacterium, incompatible interaction; P:defense response to fungus, incompatible interaction; P:systemic …
	P:megasporogenesis; P:microsporogenesis; P:positive regulation of flower development; P:vegetative to reproductive phase transition of meristem; P:inflorescence development; P:regulation of vegetative phase change; P:leaf shaping; P:cell differentiation; P:defense response to bacterium; P:positive regulation of transcription, DNA-templated; P:regulation of timing of transition from vegetative to …
	P:methylation; P:lipid homeostasis; F:mRNA binding; F:S-adenosylmethionine-dependent methyltransferase activity; C:cytoplasm
EC:1.14.14.137; EC:1.14.13	P:microtubule bundle formation; P:response to water deprivation; P:skotomorphogenesis; P:gibberellin biosynthetic process; P:response to auxin; P:response to abscisic acid; P:fruit ripening; P:pollination; P:positive regulation of flower development; P:response to red light; P:response to UV-B; P:brassinosteroid homeostasis; P:pollen exine formation; P:sterol metabolic process; P:brassinosteroid …
EC:3.1.3.16	P:microtubule cytoskeleton organization; P:protein dephosphorylation; P:drought recovery; P:negative regulation of growth; P:regulation of microtubule binding; F:protein serine/threonine phosphatase activity; F:protein binding; F:metal ion binding; C:nucleus; C:cytosol; C:plasma membrane
EC:2.7.11; EC:2.7.11.17; EC:2.7.11.7	P:mitotic cytokinesis; P:peptidyl-threonine phosphorylation; P:myosin II filament disassembly; P:protein autophosphorylation; F:ATP binding; F:myosin heavy chain kinase activity; F:myosin II binding; C:actomyosin contractile ring
EC:1.7.99.4; EC:4.4.1.16; EC:2.8.1.9	P:Mo-molybdopterin cofactor biosynthetic process; P:xenobiotic metabolic process; P:toxin catabolic process; P:response to heat; P:response to cold; P:response to salt stress; P:abscisic acid biosynthetic process; P:auxin-activated signaling pathway; P:stomatal movement; P:sugar mediated signaling pathway; P:molybdenum incorporation into molybdenum-molybdopterin complex; P:molybdopterin cofactor …
	P:mRNA catabolic process; P:vegetative to reproductive phase transition of meristem; P:viral process; P:oxidative RNA demethylation; P:response to karrikin; F:mRNA binding; F:protein binding; F:metal ion binding; F:dioxygenase activity; F:RNA N6-methyladenosine dioxygenase activity; C:P-body; C:plasmodesma
	P:mRNA catabolic process; P:vegetative to reproductive phase transition of meristem; P:viral process; P:oxidative RNA demethylation; P:response to karrikin; F:mRNA binding; F:protein binding; F:metal ion binding; F:dioxygenase activity; F:RNA N6-methyladenosine dioxygenase activity; C:P-body; C:plasmodesma
	P:mRNA export from nucleus; P:RNA splicing; P:ethylene-activated signaling pathway; P:production of ta-siRNAs involved in RNA interference; P:mRNA 3'-end processing; P:replication fork processing; P:positive regulation of DNA-templated transcription, elongation; P:regulation of apoptotic process; P:viral mRNA export from host cell nucleus; P:negative regulation of isotype switching to IgA isotype…
EC:2.7.11; EC:2.1.1.43; EC:2.3.1.48	P:mRNA splicing, via spliceosome; P:eye development; P:chondrocyte development; P:DNA repair; P:chromatin remodeling; P:activation of cysteine-type endopeptidase activity involved in apoptotic process; P:endoplasmic reticulum organization; P:haltere development; P:heart development; P:lactation; P:red, far-red light phototransduction; P:response to blue light; P:shade avoidance; P:skotomorphogene…
	P:negative regulation of auxin mediated signaling pathway; P:galactose transmembrane transport; P:protein homooligomerization; P:auxin transport; F:identical protein binding; F:sugar transmembrane transporter activity; C:endoplasmic reticulum membrane; C:integral component of plasma membrane
EC:1.5.3.17; EC:1.5.3.16; EC:1.5.3.13; EC:1.5.3.11; EC:1.14.11.65; EC:1.14.11.66; EC:1.14.11.67	P:negative regulation of transcription by RNA polymerase II; P:alternative mRNA splicing, via spliceosome; P:positive regulation of neuroblast proliferation; P:chromatin silencing; P:regulation of gene expression by genetic imprinting; P:blood coagulation; P:vegetative to reproductive phase transition of meristem; P:regulation of double-strand break repair via homologous recombination; P:regulati…
EC:1.1.1.105; EC:1.1.1.300; EC:1.2.1.5; EC:1.2.1.4; EC:1.1.1.2	P:negative regulation of transcription by RNA polymerase II; P:osteoblast differentiation; P:cellular calcium ion homeostasis; P:visual perception; P:response to high light intensity; P:retina layer formation; P:protein transport; P:adaptation of rhodopsin mediated signaling; P:negative regulation of Wnt signaling pathway; P:eye photoreceptor cell development; P:retinol metabolic process; P:retin…
	P:negative regulation of transcription by RNA polymerase II; P:vasculogenesis; P:proepicardium development; P:heart development; P:response to wounding; P:regulation of keratinocyte proliferation; P:phosphatidylinositol 3-kinase signaling; P:RNA interference; P:neural tube development; P:regulation of mRNA 3'-end processing; P:positive regulation of nuclease activity; P:regulation of tumor necros…
	P:negative regulation of transcription by RNA polymerase II; P:vasculogenesis; P:proepicardium development; P:heart development; P:response to wounding; P:regulation of keratinocyte proliferation; P:phosphatidylinositol 3-kinase signaling; P:RNA interference; P:neural tube development; P:regulation of mRNA 3'-end processing; P:regulation of tumor necrosis factor production; P:negative regulation …
	P:negative regulation of transcription by RNA polymerase II; P:vasculogenesis; P:proepicardium development; P:heart development; P:response to wounding; P:regulation of keratinocyte proliferation; P:phosphatidylinositol 3-kinase signaling; P:RNA interference; P:neural tube development; P:regulation of mRNA 3'-end processing; P:regulation of tumor necrosis factor production; P:negative regulation …
	P:neurotransmitter secretion; P:protein insertion into mitochondrial inner membrane from matrix; P:protein hexamerization; P:sodium ion transmembrane transport; P:cristae formation; P:protein homooligomerization; P:negative regulation of mitochondrial calcium ion concentration; P:mitochondrion morphogenesis; P:cellular response to hypoxia; P:potassium ion transmembrane transport; P:anion transmem…
	P:nitric oxide mediated signal transduction; P:response to cold; P:response to water deprivation; P:pollen development; P:systemic acquired resistance; P:response to salt stress; P:induced systemic resistance; P:response to abscisic acid; P:embryo development ending in seed dormancy; P:salicylic acid mediated signaling pathway; P:negative regulation of gibberellic acid mediated signaling pathway;…
	P:nitrite transport; P:nitrate assimilation; P:lateral root development; P:transmembrane transport; P:cellular response to nitrate; P:response to karrikin; P:nitrate import; F:protein binding; F:nitrate transmembrane transporter activity; F:nitrite transmembrane transporter activity; C:plasma membrane; C:plant-type vacuole membrane; C:integral component of membrane; C:transporter complex
	P:nuclear-transcribed mRNA catabolic process, nonsense-mediated decay; P:mRNA processing; P:regulation of translation; P:RNA splicing; P:mRNA transport; F:mRNA binding; C:nucleus; C:cytoplasm
	P:nucleobase-containing compound metabolic process; P:response to oxidative stress; P:brain development; P:response to toxic substance; P:L-ascorbic acid transmembrane transport; P:L-ascorbic acid metabolic process; P:lung development; P:hypoxanthine transport; P:sodium ion transmembrane transport; P:dehydroascorbic acid transport; P:transepithelial L-ascorbic acid transport; P:adenine import acr…
EC:2.7.11; EC:2.7.11.23; EC:2.7.12.1; EC:2.7.11.24; EC:2.7.11.22	P:ossification; P:positive regulation of neuroblast proliferation; P:nematode larval development; P:regulation of transcription by RNA polymerase I; P:regulation of transcription by RNA polymerase III; P:transcription initiation from RNA polymerase II promoter; P:inflammatory response; P:cellular response to DNA damage stimulus; P:JUN phosphorylation; P:donor selection; P:response to heat; P:resp…
EC:3.4.24.61; EC:3.4.24.23; EC:3.4.21.73; EC:3.4.24.7; EC:3.4.24.24; EC:3.4.24.69; EC:3.4.21.71; EC:3.4.24.3; EC:3.4.24.64; EC:3.4.21.34; EC:3.4.21.78; EC:3.4.24.21; EC:3.4.21.75; EC:3.4.24.22; EC:3.4.21.26; EC:3.4.21.27; EC:3.4.21.68; EC:3.4.21.69; EC:3.4.24.17; EC:3.4.24.18; EC:3.4.24.19; EC:3.4.24.70; EC:3.4.24.71; EC:3.4.24.72; EC:3.4.24.34; EC:3.4.24.35; EC:3.4.21.41; EC:3.4.24.37; EC:3.4.21…	P:ovarian follicle development; P:ovulation from ovarian follicle; P:luteinization; P:response to hypoxia; P:negative regulation of protein phosphorylation; P:positive regulation of protein phosphorylation; P:blood vessel maturation; P:intramembranous ossification; P:positive regulation of leukocyte migration; P:inflammatory response; P:heart development; P:embryo implantation; P:parturition; P:r…
EC:2.7.7.15; EC:2.7.7.14	P:ovarian follicle development; P:phosphatidylethanolamine biosynthetic process; P:CDP-choline pathway; P:spermatogenesis; P:response to vasopressin; F:choline-phosphate cytidylyltransferase activity; F:ethanolamine-phosphate cytidylyltransferase activity; F:calmodulin binding; F:phosphatidylcholine binding; F:protein homodimerization activity; C:nuclear envelope; C:endoplasmic reticulum membrane…
EC:2.7.11	P:pattern recognition receptor signaling pathway; P:cell surface receptor signaling pathway; P:plant-type cell wall organization; P:hormone-mediated signaling pathway; P:unidimensional cell growth; P:regulation of meristem structural organization; P:protoderm histogenesis; P:regulation of meristem growth; P:cellulose biosynthetic process; P:cuticle development; P:innate immune response; P:protein…
EC:2.7.11; EC:2.7.11.30	P:pattern recognition receptor signaling pathway; P:transmembrane receptor protein serine/threonine kinase signaling pathway; P:defense response to bacterium, incompatible interaction; P:lipopolysaccharide-mediated signaling pathway; P:detection of lipopolysaccharide; P:cellular protein localization; P:protein autophosphorylation; P:recognition of pollen; P:cellular response to salicylic acid sti…
	P:phosphate ion transport; P:nodulation; P:cellular response to sulfate starvation; P:sulfate import across plasma membrane; F:protein binding; F:secondary active sulfate transmembrane transporter activity; F:symporter activity; F:anion:anion antiporter activity; F:guanyl nucleotide binding; C:integral component of plasma membrane; C:plasmodesma; C:chloroplast membrane
	P:phosphate ion transport; P:nodulation; P:cellular response to sulfate starvation; P:sulfate import across plasma membrane; F:protein binding; F:secondary active sulfate transmembrane transporter activity; F:symporter activity; F:anion:anion antiporter activity; C:nucleoplasm; C:lysosomal membrane; C:endoplasmic reticulum; C:Golgi apparatus; C:integral component of plasma membrane; C:plasmodesma…
	P:plant-type cell wall organization; F:UDP-xylosyltransferase activity; F:arabinosyltransferase activity; C:Golgi membrane; C:integral component of membrane
EC:4.6.1.1	P:plant-type hypersensitive response; P:defense response to fungus, incompatible interaction; P:regulation of immune response; P:defense response to Gram-negative bacterium; F:adenylate cyclase activity; F:ATP binding; F:ADP binding; F:protein self-association; C:nucleus; C:cytoplasm; C:plasmodesma; C:endomembrane system; C:extrinsic component of plasma membrane
EC:3.1.1.23; EC:3.1.1.1	P:plant-type hypersensitive response; P:response to abscisic acid; P:lateral root formation; P:lipid catabolic process; P:oxylipin biosynthetic process; P:response to cadmium ion; P:defense response to virus; P:cellular response to hypoxia; F:phospholipase activity; F:transferase activity; F:identical protein binding; F:nutrient reservoir activity; F:acylglycerol lipase activity; C:vacuole; C:mem…
EC:3.1.1.23; EC:3.1.1.1	P:plant-type hypersensitive response; P:response to abscisic acid; P:lateral root formation; P:lipid catabolic process; P:oxylipin biosynthetic process; P:response to cadmium ion; P:defense response to virus; P:cellular response to hypoxia; F:phospholipase activity; F:identical protein binding; F:nutrient reservoir activity; F:acylglycerol lipase activity; C:vacuole; C:membrane
	P:plant-type hypersensitive response; P:response to salt stress; P:regulation of salicylic acid metabolic process; P:defense response by callose deposition; C:plasma membrane
	P:pollen development; P:response to wounding; P:response to auxin; P:response to salicylic acid; P:flower development; P:regulation of systemic acquired resistance; P:defense response to bacterium; P:regulation of cellular response to alkaline pH; P:regulation of jasmonic acid mediated signaling pathway; F:protein homodimerization activity; C:nucleus; C:cytosol
EC:2.3.1.195; EC:2.3.1.140; EC:2.3.1.93; EC:2.3.1.188; EC:2.3.1.166	P:polyamine metabolic process; P:alkaloid biosynthetic process; P:suberin biosynthetic process; P:green leaf volatile biosynthetic process; P:paclitaxel biosynthetic process; P:cell wall pectin biosynthetic process; P:alkyl caffeate ester biosynthetic process; F:acetyl CoA:(Z)-3-hexen-1-ol acetyltransferase activity; F:13-hydroxylupinine O-tigloyltransferase activity; F:rosmarinate synthase activ…
EC:2.7.11; EC:2.7.11.26; EC:2.7.12.1	P:positive regulation of protein phosphorylation; P:endocytosis; P:microtubule nucleation; P:Golgi organization; P:response to cold; P:photomorphogenesis; P:response to brassinosteroid; P:blue light signaling pathway; P:auxin metabolic process; P:regulation of G2/M transition of mitotic cell cycle; P:peptidyl-serine phosphorylation; P:negative regulation of Wnt signaling pathway; P:negative regul…
EC:3.3.2.10; EC:3.3.2.9; EC:3.1.3.76; EC:2.3.1.38; EC:3.1.1.5; EC:3.7.1.9; EC:2.3.1.12; EC:3.1.1.1; EC:3.7.1.13	P:prostaglandin production involved in inflammatory response; P:protein targeting to peroxisome; P:phosphatidic acid biosynthetic process; P:biotin biosynthetic process; P:response to toxic substance; P:positive regulation of gene expression; P:chlorophyll catabolic process; P:lipid catabolic process; P:sensory perception of pain; P:epoxygenase P450 pathway; P:phosphatidylethanolamine acyl-chain …
EC:2.7.11	P:protein autophosphorylation; P:recognition of pollen; P:positive regulation of brassinosteroid mediated signaling pathway; F:protein serine/threonine kinase activity; F:calmodulin binding; F:ATP binding; F:carbohydrate binding; F:ubiquitin protein ligase binding; C:plasma membrane; C:integral component of membrane
EC:3.1.3.16	P:protein dephosphorylation; F:protein serine/threonine phosphatase activity; F:metal ion binding; C:cytosol; C:plasma membrane
EC:3.6.1.15	P:protein import into nucleus; P:cytoskeleton organization; P:signal transduction; P:response to auxin; P:leaf morphogenesis; P:xylem and phloem pattern formation; P:phloem or xylem histogenesis; P:endocytic recycling; P:cellular response to reactive oxygen species; P:proteasome-mediated ubiquitin-dependent protein catabolic process; P:regulation of receptor-mediated endocytosis; P:root hair cell…
EC:2.7.11	P:protein phosphorylation; P:multicellular organism development; P:response to nutrient; P:response to water deprivation; P:negative regulation of abscisic acid-activated signaling pathway; P:stomatal movement; P:basipetal auxin transport; P:intracellular signal transduction; P:hyperosmotic salinity response; P:potassium ion transmembrane transport; F:protein serine/threonine kinase activity; F:p…
EC:2.7.11; EC:2.7.11.23; EC:2.7.11.22	P:protein phosphorylation; P:regulation of cell cycle; F:cyclin-dependent protein serine/threonine kinase activity; F:protein binding; F:ATP binding; F:RNA polymerase II CTD heptapeptide repeat kinase activity; C:chloroplast; C:mediator complex
EC:2.7.11; EC:3.2.1.21; EC:3.2.1.52; EC:3.1.4.3; EC:3.2.1.58; EC:3.2.1.14; EC:3.2.1.25; EC:3.2.1.39; EC:2.7.11.30	P:protein phosphorylation; P:transmembrane receptor protein serine/threonine kinase signaling pathway; P:response to virus; P:systemic acquired resistance; P:response to salt stress; P:induced systemic resistance; P:response to ethylene; P:response to abscisic acid; P:response to salicylic acid; P:response to UV-B; P:negative regulation of endopeptidase activity; P:regulation of anthocyanin biosy…
	P:protein polyubiquitination; P:mitotic cell cycle checkpoint; P:male meiosis I; P:small GTPase mediated signal transduction; P:spermatogenesis; P:axon guidance; P:visual perception; P:post-embryonic development; P:protein deubiquitination; P:regulation of protein ubiquitination; P:protein destabilization; P:positive regulation of proteasomal ubiquitin-dependent protein catabolic process; P:enter…
EC:2.3.1.225	P:protein polyubiquitination; P:regulation of transcription, DNA-templated; P:male meiotic nuclear division; P:spermatogenesis; P:axonogenesis; P:protein palmitoylation; P:gene silencing by RNA; P:positive regulation of proteasomal ubiquitin-dependent protein catabolic process; P:endosomal vesicle fusion; P:piRNA metabolic process; P:retrograde transport, endosome to Golgi; P:DNA methylation invo…
EC:3.4.24.70; EC:3.4.99; EC:3.4.24.71; EC:3.4.24; EC:3.4.24.61; EC:3.4.24.72; EC:3.4.24.23; EC:3.4.24.56; EC:3.4.24.24; EC:3.4.24.35; EC:3.4.24.57; EC:3.4.24.14; EC:3.4.24.69; EC:3.4.24.37; EC:3.4.24.59; EC:3.4.24.64; EC:3.4.24.21; EC:3.4.24.11; EC:3.4.24.22; EC:3.4.24.55; EC:3.4.24.17; EC:3.4.24.18; EC:3.4.24.19	P:protein processing involved in protein targeting to mitochondrion; P:mitochondrial calcium ion transmembrane transport; F:metalloendopeptidase activity; F:metal ion binding; C:mitochondrial inner membrane; C:cytosol; C:chloroplast stroma; C:mitochondrial processing peptidase complex
EC:3.4.99; EC:3.4.23.1; EC:3.4.23; EC:3.4.23.32; EC:3.4.23.43; EC:3.4.23.20; EC:3.4.23.25; EC:3.4.23.36; EC:3.4.23.4; EC:3.4.23.35; EC:3.4.23.5; EC:3.4.23.34; EC:3.4.23.15	P:proteolysis; P:defense response to fungus; F:aspartic-type endopeptidase activity; F:protein binding; C:integral component of membrane
	P:proteolysis; P:response to cold; P:auxin-activated signaling pathway; P:seed germination; P:regulation of flower development; P:response to organonitrogen compound; P:regulation of auxin biosynthetic process; P:circadian regulation of gene expression; P:positive regulation of circadian rhythm; P:negative regulation of circadian rhythm; P:regulation of protein-containing complex assembly; P:nega…
EC:1.2.1.70	P:protoporphyrinogen IX biosynthetic process; P:response to oxidative stress; P:chlorophyll biosynthetic process; P:oxidation-reduction process; F:protein binding; F:glutamyl-tRNA reductase activity; F:NADP binding; C:chloroplast membrane
EC:1.2.1.70	P:protoporphyrinogen IX biosynthetic process; P:response to oxidative stress; P:chlorophyll biosynthetic process; P:oxidation-reduction process; F:protein binding; F:glutamyl-tRNA reductase activity; F:NADP binding; C:cyanelle; C:chloroplast membrane
	P:red, far-red light phototransduction; P:entrainment of circadian clock; P:regulation of flower development; P:response to red light; P:positive regulation of circadian rhythm; P:photoperiodism, flowering; P:response to karrikin; F:protein homodimerization activity; C:nucleus
EC:2.7.11; EC:2.7.11.30	P:regulation of cell growth; P:receptor-mediated endocytosis; P:transmembrane receptor protein serine/threonine kinase signaling pathway; P:embryo sac development; P:plant-type cell wall organization; P:hormone-mediated signaling pathway; P:jasmonic acid and ethylene-dependent systemic resistance; P:polarity specification of adaxial/abaxial axis; P:leaf morphogenesis; P:procambium histogenesis; P…
	P:regulation of sulfur utilization; P:male meiotic nuclear division; P:microsporogenesis; P:chloroplast organization; P:cellular response to sulfur starvation; P:regulation of glucosinolate biosynthetic process; P:cell division; F:protein binding; C:nucleus; C:transcription repressor complex
	P:regulation of sulfur utilization; P:male meiotic nuclear division; P:microsporogenesis; P:chloroplast organization; P:cellular response to sulfur starvation; P:regulation of glucosinolate biosynthetic process; P:cell division; F:protein binding; C:nucleus; C:transcription repressor complex
	P:regulation of sulfur utilization; P:male meiotic nuclear division; P:microsporogenesis; P:chloroplast organization; P:cellular response to sulfur starvation; P:regulation of glucosinolate biosynthetic process; P:cell division; F:protein binding; C:nucleus; C:transcription repressor complex
	P:regulation of transcription by RNA polymerase II; P:response to water deprivation; P:response to blue light; P:response to salt stress; P:response to auxin; P:response to gibberellin; P:response to sucrose; P:negative regulation of abscisic acid-activated signaling pathway; P:lateral root formation; P:negative regulation of translation; P:negative regulation of cell growth; P:positive regulatio…
	P:regulation of transcription by RNA polymerase II; P:response to water deprivation; P:response to blue light; P:response to salt stress; P:response to auxin; P:response to gibberellin; P:response to sucrose; P:negative regulation of abscisic acid-activated signaling pathway; P:lateral root formation; P:negative regulation of translation; P:negative regulation of cell growth; P:positive regulatio…
	P:response to cold; P:response to water deprivation; P:pollen development; P:response to wounding; P:response to nematode; P:systemic acquired resistance; P:response to ethylene; P:response to auxin; P:response to jasmonic acid; P:negative regulation of abscisic acid-activated signaling pathway; P:pollen germination; P:salicylic acid mediated signaling pathway; P:negative regulation of gibberelli…
EC:2.4.1.13	P:response to hypoxia; P:sucrose metabolic process; P:response to osmotic stress; P:nodulation; P:response to carbon dioxide; P:seed maturation; P:response to anoxia; P:protein tetramerization; F:sucrose synthase activity; C:vacuole; C:cytosol; C:plasma membrane
EC:2.7.10; EC:2.7.11	P:response to molecule of bacterial origin; P:peptidyl-tyrosine phosphorylation; P:innate immune response; P:negative regulation of immune response; P:negative regulation of floral organ abscission; P:positive regulation of defense response to bacterium; P:positive regulation of stomatal opening; F:protein serine/threonine kinase activity; F:protein tyrosine kinase activity; F:ATP binding; F:Tat …
	P:response to molecule of bacterial origin; P:response to molecule of fungal origin; P:response to cold; P:response to water deprivation; P:response to wounding; P:response to salt stress; P:gibberellin metabolic process; P:response to abscisic acid; P:response to salicylic acid; P:response to jasmonic acid; P:ethylene-activated signaling pathway; P:negative regulation of gibberellic acid mediate…
	P:response to molecule of bacterial origin; P:response to wounding; P:response to salicylic acid; P:response to chitin; P:regulation of defense response; P:defense response to bacterium; P:negative regulation of transcription, DNA-templated; P:defense response to fungus; F:transcription regulatory region sequence-specific DNA binding; F:DNA-binding transcription factor activity; F:identical prote…
	P:response to molecule of oomycetes origin; P:cellular response to starvation; P:plant-type hypersensitive response; P:entrainment of circadian clock; P:positive regulation of transcription, DNA-templated; P:cellular response to abscisic acid stimulus; P:cellular response to glucose stimulus; P:positive regulation of seed maturation; F:transcription regulatory region sequence-specific DNA binding…
	P:response to osmotic stress; P:response to heat; P:response to wounding; P:response to absence of light; P:response to abscisic acid; P:root morphogenesis; P:leaf senescence; P:auxin homeostasis; P:negative regulation of defense response; P:iron ion transmembrane transport; P:xenobiotic transport; P:regulation of organ growth; P:iron ion homeostasis; P:cellular response to carbon dioxide; P:absc…
EC:3.1.4.4	P:response to oxidative stress; P:response to cold; P:response to water deprivation; P:response to salt stress; P:positive regulation of abscisic acid-activated signaling pathway; P:embryo development ending in seed dormancy; P:defense response to bacterium, incompatible interaction; P:response to aluminum ion; P:programmed cell death; P:phosphatidylcholine catabolic process; P:membrane lipid cat…
EC:3.1.4.4	P:response to oxidative stress; P:response to cold; P:response to water deprivation; P:response to salt stress; P:positive regulation of abscisic acid-activated signaling pathway; P:embryo development ending in seed dormancy; P:defense response to bacterium, incompatible interaction; P:response to aluminum ion; P:programmed cell death; P:phosphatidylcholine catabolic process; P:membrane lipid cat…
EC:2.7.10; EC:2.7.10.1; EC:2.7.11; EC:2.7.11.30	P:response to oxidative stress; P:transmembrane receptor protein serine/threonine kinase signaling pathway; P:abscisic acid-activated signaling pathway; P:defense response to bacterium, incompatible interaction; P:unidimensional cell growth; P:seed germination; P:regulation of meristem structural organization; P:endosperm development; P:procambium histogenesis; P:regulation of root meristem growt…
	P:response to reactive oxygen species; P:defense response to oomycetes; P:response to insect; P:systemic acquired resistance, salicylic acid mediated signaling pathway; P:induced systemic resistance, jasmonic acid mediated signaling pathway; P:regulation of ethylene-activated signaling pathway; P:response to chitin; P:negative regulation of transcription, DNA-templated; P:regulation of response t…
	P:response to salt stress; P:response to abscisic acid; P:regulation of stomatal movement; F:calmodulin binding; C:nucleus; C:chloroplast
EC:1.8.4.12	P:response to singlet oxygen; P:cold acclimation; P:protein repair; P:cellular response to oxidative stress; P:oxidation-reduction process; F:zinc ion binding; F:peptide-methionine (R)-S-oxide reductase activity; F:methionine-R-sulfoxide reductase activity; C:nucleus; C:mitochondrion; C:endoplasmic reticulum; C:cytosol; C:chloroplast stroma
EC:1.10.3; EC:1.10.3.2	P:response to water deprivation; P:lignin biosynthetic process; P:plant-type secondary cell wall biogenesis; P:lignin catabolic process; P:oxidation-reduction process; F:copper ion binding; F:hydroquinone:oxygen oxidoreductase activity; C:apoplast
EC:1.10.3; EC:1.10.3.2	P:response to water deprivation; P:lignin biosynthetic process; P:plant-type secondary cell wall biogenesis; P:lignin catabolic process; P:oxidation-reduction process; F:copper ion binding; F:hydroquinone:oxygen oxidoreductase activity; C:apoplast
EC:1.10.3; EC:1.10.3.2	P:response to water deprivation; P:lignin biosynthetic process; P:plant-type secondary cell wall biogenesis; P:lignin catabolic process; P:response to copper ion; P:oxidation-reduction process; F:copper ion binding; F:hydroquinone:oxygen oxidoreductase activity; C:apoplast
	P:response to water deprivation; P:response to salt stress; P:response to abscisic acid; P:galactose transmembrane transport; P:mannose transmembrane transport; P:sucrose transport; P:L-arabinose transmembrane transport; P:cellular response to glucose stimulus; P:glucose transmembrane transport; F:galactose transmembrane transporter activity; F:high-affinity glucose:proton symporter activity; F:s…
	P:response to water deprivation; P:response to wounding; P:response to herbicide; P:auxin-activated signaling pathway; P:response to abscisic acid; P:response to salicylic acid; P:response to jasmonic acid; P:embryo development ending in seed dormancy; P:pollen tube growth; P:suspensor development; P:response to nitrate; P:gibberellic acid homeostasis; P:basipetal auxin transport; P:protein trans…
EC:2.7.6.5	P:response to wounding; P:response to abscisic acid; P:leaf senescence; P:guanosine tetraphosphate biosynthetic process; P:photosynthesis; P:phosphorylation; F:ATP binding; F:GTP binding; F:GTP diphosphokinase activity; F:kinase activity; C:chloroplast
	P:response to wounding; P:response to auxin; P:response to salicylic acid; P:regulation of systemic acquired resistance; P:response to chitin; P:regulation of jasmonic acid mediated signaling pathway; F:protein homodimerization activity; C:nucleus
EC:2.7.11	P:response to wounding; P:response to fungus; P:brassinosteroid mediated signaling pathway; P:unidimensional cell growth; P:regulation of defense response; P:pH reduction; P:protein autophosphorylation; F:transcription regulatory region sequence-specific DNA binding; F:peptide receptor activity; F:protein serine/threonine kinase activity; F:transmembrane signaling receptor activity; F:ATP binding…
	P:RNA splicing; P:embryo development ending in seed dormancy; P:mitochondrial translation; F:zinc ion binding; C:mitochondrion; C:chloroplast
	P:RNA splicing; P:phloem or xylem histogenesis; P:leaf vascular tissue pattern formation; P:cotyledon vascular tissue pattern formation; P:cytidine to uridine editing; P:chloroplast RNA processing; P:polycistronic mRNA processing; P:mitochondrial mRNA modification; P:chloroplast RNA modification; F:RNA binding; F:protein binding; F:zinc ion binding; C:mitochondrion; C:chloroplast
EC:3.6.1.15	P:rRNA processing; P:response to light stimulus; P:chloroplast organization; P:embryo development ending in seed dormancy; P:thylakoid membrane organization; F:magnesium ion binding; F:GTPase activity; F:GTP binding; C:chloroplast stroma; C:chloroplast inner membrane
EC:2.5.1.48; EC:4.4.1.8; EC:4.4.1.11; EC:4.4.1.1; EC:4.4.1.2; EC:4.4.1.13	P:selenium compound metabolic process; P:positive regulation of cell population proliferation; P:pathogenesis; P:cellular response to sulfate starvation; P:L-methionine biosynthetic process from L-homoserine via cystathionine; P:cysteine biosynthetic process via cystathionine; P:transsulfuration; P:methionine catabolic process via 2-oxobutanoate; P:cellular response to water deprivation; P:homocy…
	P:sensory perception of sound; P:negative regulation of phosphatase activity; P:electron transport chain; P:inner ear auditory receptor cell differentiation; P:post-embryonic animal organ morphogenesis; P:vestibular receptor cell development; P:inner ear receptor cell stereocilium organization; F:protein binding; F:electron transfer activity; F:protein disulfide oxidoreductase activity; C:plasma …
EC:2.7.8.3; EC:2.7.1.227; EC:2.7.8.27	P:sphingomyelin biosynthetic process; P:inflammatory response; P:positive regulation of gene expression; P:phosphorylation; P:regulation of bone mineralization; P:ceramide biosynthetic process; P:cellular response to lipopolysaccharide; P:cellular response to tumor necrosis factor; P:ceramide phosphoethanolamine biosynthetic process; P:negative regulation of extrinsic apoptotic signaling pathway;…
EC:3.6.1.15	P:SRP-dependent cotranslational protein targeting to membrane; P:axonogenesis; P:regulation of protein secretion; F:GTPase activity; F:signal recognition particle binding; F:protein binding; F:GTP binding; F:7S RNA binding; C:signal recognition particle receptor complex; C:signal recognition particle, endoplasmic reticulum targeting; C:chloroplast stroma; C:intrinsic component of plasma membrane
EC:3.2.1.80; EC:3.2.1.20; EC:3.2.1.154; EC:2.4.1.100; EC:2.4.1.243; EC:2.4.1.99; EC:3.2.1.26; EC:3.2.1.48	P:sucrose metabolic process; P:response to wounding; P:response to bacterium; P:response to salt stress; P:abscisic acid-activated signaling pathway; P:defense response to fungus; P:cellular response to gibberellin stimulus; P:response to karrikin; F:sucrose alpha-glucosidase activity; F:protein binding; F:6G-fructosyltransferase activity; F:fructan beta-(2,6)-fructosidase activity; F:1,2-beta-fr…
EC:3.2.1.20; EC:3.2.1.154; EC:2.4.1.100; EC:2.4.1.243; EC:2.4.1.99; EC:3.2.1.26; EC:3.2.1.48	P:sucrose metabolic process; P:response to wounding; P:response to salt stress; P:abscisic acid-activated signaling pathway; P:defense response to bacterium; P:defense response to fungus; P:carbohydrate storage; P:cellular response to gibberellin stimulus; P:response to karrikin; F:sucrose alpha-glucosidase activity; F:protein binding; F:6G-fructosyltransferase activity; F:fructan beta-(2,6)-fruc…
EC:2.7.7.4; EC:2.7.1.25	P:sulfate assimilation; P:selenium compound metabolic process; P:blood coagulation; P:cellular response to sulfate starvation; P:phosphorylation; P:response to cadmium ion; P:3'-phosphoadenosine 5'-phosphosulfate biosynthetic process; P:bone development; P:protein trimerization; P:hydrogen sulfide biosynthetic process; F:adenylylsulfate kinase activity; F:sulfate adenylyltransferase (ATP) activit…
EC:2.3.1.48	P:syncytium formation by mitosis without cytokinesis; P:transcription open complex formation at RNA polymerase II promoter; P:transcriptional start site selection at RNA polymerase II promoter; P:endosperm development; P:pollen tube guidance; P:histone acetylation; P:mRNA transcription by RNA polymerase II; P:snRNA transcription by RNA polymerase II; P:positive regulation by host of viral transcr…
EC:2.3.1.48	P:syncytium formation by mitosis without cytokinesis; P:transcription open complex formation at RNA polymerase II promoter; P:transcriptional start site selection at RNA polymerase II promoter; P:endosperm development; P:pollen tube guidance; P:histone acetylation; P:mRNA transcription by RNA polymerase II; P:snRNA transcription by RNA polymerase II; P:positive regulation by host of viral transcr…
EC:2.3.1.48	P:syncytium formation by mitosis without cytokinesis; P:transcriptional start site selection at RNA polymerase II promoter; P:endosperm development; P:pollen tube guidance; P:histone acetylation; P:mRNA transcription by RNA polymerase II; P:snRNA transcription by RNA polymerase II; P:positive regulation by host of viral transcription; P:response to cadmium ion; P:RNA polymerase II preinitiation c…
EC:3.2.1.55; EC:3.2.1.37	P:systemic acquired resistance; P:seed coat development; P:arabinan catabolic process; P:D-xylose metabolic process; P:xylan catabolic process; F:xylan 1,4-beta-xylosidase activity; F:xylosyltransferase activity; F:alpha-L-arabinofuranosidase activity; C:vacuolar membrane; C:plant-type cell wall; C:plasmodesma; C:chloroplast; C:apoplast
EC:2.2.1.7	P:thiamine biosynthetic process; P:chlorophyll biosynthetic process; P:terpenoid biosynthetic process; P:isopentenyl diphosphate biosynthetic process, methylerythritol 4-phosphate pathway; P:1-deoxy-D-xylulose 5-phosphate biosynthetic process; F:magnesium ion binding; F:1-deoxy-D-xylulose-5-phosphate synthase activity; F:thiamine pyrophosphate binding; F:identical protein binding; C:chloroplast s…
EC:1.13.11; EC:1.13.11.24	P:transcription by RNA polymerase II; P:digestion; P:abscisic acid-activated signaling pathway; P:blue light signaling pathway; P:negative regulation of peptidase activity; P:monocyte differentiation; P:defense response to bacterium; P:oxidation-reduction process; P:regulation of nucleic acid-templated transcription; F:transcription coregulator activity; F:protein binding; F:quercetin 2,3-dioxyge…
	P:transcriptional start site selection at RNA polymerase II promoter; P:endosperm development; P:pollen tube guidance; P:RNA polymerase II preinitiation complex assembly; P:regulation of pollen tube growth; F:RNA polymerase II core promoter sequence-specific DNA binding; F:RNA polymerase II complex recruiting activity; F:TBP-class protein binding; F:metal ion binding; C:nucleus; C:cytoplasm; C:tr…
	P:tryptophan biosynthetic process; P:defense response to insect; P:response to wounding; P:response to abscisic acid; P:indole glucosinolate biosynthetic process; P:cinnamic acid biosynthetic process; P:xylem development; P:trichome branching; P:regulation of stomatal movement; P:seed coat development; P:cellular response to sulfur starvation; P:cuticle pattern formation; P:negative regulation of…
	P:vacuole organization; P:gamete generation; P:response to nematode; P:photosynthetic acclimation; P:response to sucrose; P:response to glucose; P:regulation of photosynthesis; P:pollen maturation; P:phosphoglycerate transmembrane transport; P:glucose-6-phosphate transport; P:triose phosphate transmembrane transport; P:response to karrikin; P:phosphoenolpyruvate transmembrane transport; F:inorgan…
EC:6.2.1.24; EC:6.2.1.3; EC:6.2.1.1; EC:6.2.1.15	P:very long-chain fatty acid metabolic process; P:response to hypoxia; P:neuroblast proliferation; P:response to nutrient; P:phospholipid biosynthetic process; P:response to gravity; P:response to salt stress; P:response to sucrose; P:response to glucose; P:wax biosynthetic process; P:cutin biosynthetic process; P:response to ozone; P:lateral root formation; P:positive regulation of long-chain fa…
EC:1.1.1.65	P:vitamin B6 catabolic process; P:pyridoxal biosynthetic process; P:oxidation-reduction process; F:pyridoxine:NADP 4-dehydrogenase activity; F:NADPH binding; C:chloroplast thylakoid membrane; C:chloroplast envelope; C:plastoglobule
EC:1.1.1.65	P:vitamin B6 catabolic process; P:pyridoxal biosynthetic process; P:oxidation-reduction process; F:pyridoxine:NADP 4-dehydrogenase activity; F:NADPH binding; C:nucleus; C:chloroplast thylakoid membrane; C:chloroplast envelope; C:plastoglobule
EC:1.1.1.65	P:vitamin B6 catabolic process; P:pyridoxal biosynthetic process; P:oxidation-reduction process; F:pyridoxine:NADP 4-dehydrogenase activity; F:NADPH binding; C:nucleus; C:chloroplast thylakoid membrane; C:chloroplast envelope; C:plastoglobule
	P:water transport; P:autophagy; P:vacuole organization; P:unidimensional cell growth; P:water homeostasis; P:defense response to bacterium; P:leaf development; P:urea transmembrane transport; P:methylammonium transmembrane transport; P:hydrogen peroxide transmembrane transport; F:methylammonium transmembrane transporter activity; F:urea transmembrane transporter activity; F:water channel activity…
EC:2.7.11; EC:2.7.11.30	P:water transport; P:receptor-mediated endocytosis; P:transmembrane receptor protein serine/threonine kinase signaling pathway; P:embryo sac development; P:microsporogenesis; P:response to wounding; P:hormone-mediated signaling pathway; P:regulation of meristem structural organization; P:procambium histogenesis; P:regulation of root meristem growth; P:xylem development; P:stomatal complex morphog…
	P:water transport; P:response to water deprivation; P:protein homotetramerization; P:protein heterotetramerization; P:transmembrane transport; F:protein binding; F:water channel activity; C:mitochondrion; C:vacuole; C:endoplasmic reticulum; C:cytosol; C:plasma membrane; C:plasmodesma; C:chloroplast envelope; C:integral component of membrane; C:protein-containing complex
	P:water transport; P:response to water deprivation; P:response to abscisic acid; P:root hair elongation; P:protein homotetramerization; P:protein heterotetramerization; P:hydrogen peroxide transmembrane transport; F:mRNA binding; F:water channel activity; F:ubiquitin protein ligase binding; C:nucleus; C:vacuole; C:plasma membrane; C:plasmodesma; C:integral component of membrane; C:protein-contain…
	P:zinc ion transport; P:response to cold; P:response to water deprivation; P:response to salt stress; P:response to abscisic acid; P:positive regulation of seed germination; P:response to chitin; P:monosaccharide transmembrane transport; P:lactose transport; P:maltose transport; P:sucrose transport; P:trehalose transport; P:glucose homeostasis; F:protein binding; F:monosaccharide transmembrane tr…

## Sheet: C
SeqName	Description	Length	#Hits	e-Value	sim mean	#GO	GO IDs	GO Names	Enzyme Codes	Enzyme Names	InterPro IDs	InterPro GO IDs	InterPro GO Names
TRINITY_DN69697_c0_g1_i1	RecName: Full=Thylakoid protein sll1769	140	2	6.03431e-22	66.03	3	C:GO:0009535; C:GO:0010287; C:GO:0031969	C:chloroplast thylakoid membrane; C:plastoglobule; C:chloroplast membrane			IPR040003 (PANTHER)	P:GO:0010027	P:thylakoid membrane organization
TRINITY_DN66072_c0_g2_i1	RecName: Full=Uncharacterized protein At5g48480	163	3	1.51819e-33	47.87	1	C:GO:0005829	C:cytosol			IPR028973 (PFAM); IPR029068 (G3DSA:3.10.180.GENE3D); PTHR34109 (PANTHER); cd07246 (CDD); IPR029068 (SUPERFAMILY)	no GO terms	no GO terms
TRINITY_DN80586_c0_g2_i1	RecName: Full=Myosin-binding protein 7	409	7	1.13832e-22	65.19	3	F:GO:0080115; C:GO:0016021; C:GO:0030133	F:myosin XI tail binding; C:integral component of membrane; C:transport vesicle			Coil (COILS); Coil (COILS); IPR007656 (PFAM); PTHR31422 (PANTHER); PTHR31422:SF1 (PANTHER); IPR007656 (PROSITE_PROFILES)	no GO terms	no GO terms
TRINITY_DN82727_c0_g1_i1	RecName: Full=Hypersensitive-induced response protein 2; Short=AtHIR2	145	8	6.3251e-68	75.08	6	F:GO:0043424; C:GO:0005794; C:GO:0005829; C:GO:0005886; C:GO:0009506; C:GO:0009705	F:protein histidine kinase binding; C:Golgi apparatus; C:cytosol; C:plasma membrane; C:plasmodesma; C:plant-type vacuole membrane			IPR001107 (PFAM); PTHR43327:SF39 (PANTHER); PTHR43327 (PANTHER); IPR036013 (SUPERFAMILY)	no GO terms	no GO terms
TRINITY_DN88036_c0_g1_i2	RecName: Full=Serine/threonine-protein kinase OSR1; AltName: Full=Oxidative stress-responsive 1 protein	420	20	4.24021e-114	64.83	64	P:GO:0000187; P:GO:0001933; P:GO:0006972; P:GO:0007163; P:GO:0007231; P:GO:0007283; P:GO:0008217; P:GO:0009267; P:GO:0010628; P:GO:0010820; P:GO:0018105; P:GO:0018107; P:GO:0023016; P:GO:0030033; P:GO:0030336; P:GO:0031156; P:GO:0032414; P:GO:0032874; P:GO:0032956; P:GO:0035329; P:GO:0036438; P:GO:0036481; P:GO:0038116; P:GO:0038146; P:GO:0042981; P:GO:0043268; P:GO:0046777; P:GO:0048680; P:GO:00…	P:activation of MAPK activity; P:negative regulation of protein phosphorylation; P:hyperosmotic response; P:establishment or maintenance of cell polarity; P:osmosensory signaling pathway; P:spermatogenesis; P:regulation of blood pressure; P:cellular response to starvation; P:positive regulation of gene expression; P:positive regulation of T cell chemotaxis; P:peptidyl-serine phosphorylation; P:pe…	EC:2.7.11	Transferring phosphorus-containing groups	IPR000719 (SMART); G3DSA:1.10.510.10 (GENE3D); IPR000719 (PFAM); G3DSA:3.30.200.20 (GENE3D); mobidb-lite (MOBIDB_LITE); mobidb-lite (MOBIDB_LITE); PTHR48014:SF24 (PANTHER); PTHR48014 (PANTHER); IPR017441 (PROSITE_PATTERNS); IPR000719 (PROSITE_PROFILES); cd06610 (CDD); IPR011009 (SUPERFAMILY)	P:GO:0006468; F:GO:0004672; F:GO:0005524	P:protein phosphorylation; F:protein kinase activity; F:ATP binding
TRINITY_DN92574_c0_g1_i2	RecName: Full=Tyrosine--tRNA ligase, cytoplasmic; AltName: Full=Tyrosyl-tRNA synthetase; Short=TyrRS; Contains: RecName: Full=Tyrosine--tRNA ligase, cytoplasmic, N-terminally processed	397	20	0	65.39	34	P:GO:0001525; P:GO:0001731; P:GO:0001937; P:GO:0006431; P:GO:0006437; P:GO:0006915; P:GO:0006954; P:GO:0006974; P:GO:0007165; P:GO:0050900; P:GO:0051351; P:GO:0051607; P:GO:0070094; F:GO:0000049; F:GO:0004825; F:GO:0004831; F:GO:0005125; F:GO:0005524; F:GO:0008047; F:GO:0032266; F:GO:0042803; F:GO:0051020; F:GO:0080025; C:GO:0005615; C:GO:0005783; C:GO:0005794; C:GO:0005829; C:GO:0005844; C:GO:00…	P:angiogenesis; P:formation of translation preinitiation complex; P:negative regulation of endothelial cell proliferation; P:methionyl-tRNA aminoacylation; P:tyrosyl-tRNA aminoacylation; P:apoptotic process; P:inflammatory response; P:cellular response to DNA damage stimulus; P:signal transduction; P:leukocyte migration; P:positive regulation of ligase activity; P:defense response to virus; P:pos…	EC:6.1.1.1; EC:6.1.1.10	Tyrosine--tRNA ligase; Methionine--tRNA ligase	Coil (COILS); IPR002547 (PFAM); G3DSA:2.40.50.140 (GENE3D); G3DSA:1.10.730.10 (GENE3D); mobidb-lite (MOBIDB_LITE); PTHR45765 (PANTHER); PTHR45765:SF7 (PANTHER); IPR002547 (PROSITE_PROFILES); IPR041872 (CDD); cd02799 (CDD); IPR009080 (SUPERFAMILY); IPR012340 (SUPERFAMILY)	P:GO:0006418; F:GO:0000049; F:GO:0000166; F:GO:0004812; F:GO:0005524	P:tRNA aminoacylation for protein translation; F:tRNA binding; F:nucleotide binding; F:aminoacyl-tRNA ligase activity; F:ATP binding
TRINITY_DN85894_c1_g4_i1	RecName: Full=Ubiquitin-conjugating enzyme E2 2; AltName: Full=E2 ubiquitin-conjugating enzyme 2; AltName: Full=Ubiquitin carrier protein ubc2; AltName: Full=Ubiquitin-protein ligase ubc2	152	20	7.21029e-111	89.98	74	P:GO:0000422; P:GO:0000722; P:GO:0000724; P:GO:0001666; P:GO:0001835; P:GO:0006348; P:GO:0006353; P:GO:0007288; P:GO:0007507; P:GO:0008284; P:GO:0009411; P:GO:0010228; P:GO:0010390; P:GO:0010845; P:GO:0030433; P:GO:0030435; P:GO:0031571; P:GO:0032436; P:GO:0032456; P:GO:0032508; P:GO:0032869; P:GO:0033128; P:GO:0033522; P:GO:0042138; P:GO:0042275; P:GO:0042276; P:GO:0042493; P:GO:0042769; P:GO:00…	P:autophagy of mitochondrion; P:telomere maintenance via recombination; P:double-strand break repair via homologous recombination; P:response to hypoxia; P:blastocyst hatching; P:chromatin silencing at telomere; P:DNA-templated transcription, termination; P:sperm axoneme assembly; P:heart development; P:positive regulation of cell population proliferation; P:response to UV; P:vegetative to reprod…	EC:3.6.1.3; EC:3.6.4.12; EC:3.6.1.15; EC:2.3.2.23	Adenosinetriphosphatase; DNA helicase; Nucleoside-triphosphate phosphatase; E2 ubiquitin-conjugating enzyme	SM00212 (SMART); IPR016135 (G3DSA:3.10.110.GENE3D); IPR000608 (PFAM); PTHR24067 (PANTHER); PTHR24067:SF319 (PANTHER); IPR023313 (PROSITE_PATTERNS); IPR000608 (PROSITE_PROFILES); IPR000608 (CDD); IPR016135 (SUPERFAMILY)	no GO terms	no GO terms
TRINITY_DN79524_c0_g1_i2	RecName: Full=Pollen-specific protein-like At4g18596; Flags: Precursor	337	1	0.000155331	61.82	3	P:GO:0008150; C:GO:0005576; C:GO:0005615	P:biological_process; C:extracellular region; C:extracellular space			PF01190 (PFAM); mobidb-lite (MOBIDB_LITE); mobidb-lite (MOBIDB_LITE); mobidb-lite (MOBIDB_LITE); mobidb-lite (MOBIDB_LITE); mobidb-lite (MOBIDB_LITE); PTHR47273 (PANTHER); PTHR47273:SF4 (PANTHER); SIGNAL_PEPTIDE_N_REGION (PHOBIUS); NON_CYTOPLASMIC_DOMAIN (PHOBIUS); SIGNAL_PEPTIDE_C_REGION (PHOBIUS); SIGNAL_PEPTIDE (PHOBIUS); SIGNAL_PEPTIDE_H_REGION (PHOBIUS); SignalP-TM (SIGNALP_GRAM_POSITIVE); S…	no GO terms	no GO terms
TRINITY_DN89518_c2_g1_i1	RecName: Full=Pollen-specific protein-like At4g18596; Flags: Precursor	165	3	2.42618e-06	52.12	5	P:GO:0008150; F:GO:0008270; F:GO:0046872; C:GO:0005576; C:GO:0005615	P:biological_process; F:zinc ion binding; F:metal ion binding; C:extracellular region; C:extracellular space			PF01190 (PFAM); PTHR46995 (PANTHER); NON_CYTOPLASMIC_DOMAIN (PHOBIUS); SIGNAL_PEPTIDE_N_REGION (PHOBIUS); SIGNAL_PEPTIDE (PHOBIUS); SIGNAL_PEPTIDE_C_REGION (PHOBIUS); SIGNAL_PEPTIDE_H_REGION (PHOBIUS); SignalP-noTM (SIGNALP_EUK); SignalP-TM (SIGNALP_GRAM_POSITIVE)	no GO terms	no GO terms
TRINITY_DN65733_c0_g1_i1	RecName: Full=Aspartyl protease AED3; AltName: Full=Apoplastic EDS1-dependent protein 3; Flags: Precursor	439	18	1.2032e-174	47.01	26	P:GO:0005975; P:GO:0006508; P:GO:0007623; P:GO:0009414; P:GO:0009627; P:GO:0009737; P:GO:0009744; P:GO:0009860; P:GO:0010019; P:GO:0010183; P:GO:0010310; P:GO:0010337; P:GO:0030163; P:GO:0042742; P:GO:0043067; P:GO:0080167; F:GO:0000166; F:GO:0004190; C:GO:0005783; C:GO:0005829; C:GO:0005886; C:GO:0009505; C:GO:0009507; C:GO:0031225; C:GO:0048046; C:GO:0090406	P:carbohydrate metabolic process; P:proteolysis; P:circadian rhythm; P:response to water deprivation; P:systemic acquired resistance; P:response to abscisic acid; P:response to sucrose; P:pollen tube growth; P:chloroplast-nucleus signaling pathway; P:pollen tube guidance; P:regulation of hydrogen peroxide metabolic process; P:regulation of salicylic acid metabolic process; P:protein catabolic pro…	EC:3.4.99; EC:3.4.23.1; EC:3.4.23; EC:3.4.23.32; EC:3.4.23.43; EC:3.4.23.20; EC:3.4.23.25; EC:3.4.23.36; EC:3.4.23.4; EC:3.4.23.35; EC:3.4.23.5; EC:3.4.23.34; EC:3.4.23.15	Acting on peptide bonds (peptidases); Pepsin A; Acting on peptide bonds (peptidases); Scytalidopepsin B; Prepilin peptidase; Penicillopepsin; Saccharopepsin; Signal peptidase II; Chymosin; Barrierpepsin; Cathepsin D; Cathepsin E; Renin	IPR021109 (G3DSA:2.40.70.GENE3D); IPR021109 (G3DSA:2.40.70.GENE3D); IPR032861 (PFAM); IPR032799 (PFAM); IPR001461 (PANTHER); PTHR13683:SF839 (PANTHER); NON_CYTOPLASMIC_DOMAIN (PHOBIUS); SIGNAL_PEPTIDE_C_REGION (PHOBIUS); SIGNAL_PEPTIDE (PHOBIUS); SIGNAL_PEPTIDE_N_REGION (PHOBIUS); SIGNAL_PEPTIDE_H_REGION (PHOBIUS); IPR033121 (PROSITE_PROFILES); SignalP-noTM (SIGNALP_GRAM_NEGATIVE); SignalP-noTM (…	P:GO:0006508; F:GO:0004190	P:proteolysis; F:aspartic-type endopeptidase activity
TRINITY_DN82327_c0_g2_i4	RecName: Full=CBS domain-containing protein CBSX1, chloroplastic; AltName: Full=CBS domain-containing protein 2; Short=AtCDCP2; AltName: Full=Protein LOSS OF THE TIMING OF ET AND JA BIOSYNTHESIS 2; Short=AtLEJ2; Flags: Precursor	189	3	9.84993e-34	74.47	2	P:GO:0045454; C:GO:0009570	P:cell redox homeostasis; C:chloroplast stroma			IPR000644 (SMART); IPR000644 (PFAM); G3DSA:3.10.580.10 (GENE3D); PTHR48108 (PANTHER); PTHR48108:SF12 (PANTHER); IPR000644 (PROSITE_PROFILES); cd17789 (CDD); SSF54631 (SUPERFAMILY)	no GO terms	no GO terms
TRINITY_DN89040_c0_g1_i13	RecName: Full=Formin-like protein 2; AltName: Full=OsFH2; Flags: Precursor	918	20	0	67.29	15	P:GO:0009932; P:GO:0009960; P:GO:0010497; P:GO:0045010; P:GO:0048317; P:GO:0051016; F:GO:0005522; F:GO:0051015; C:GO:0005618; C:GO:0005730; C:GO:0005819; C:GO:0005886; C:GO:0009506; C:GO:0009524; C:GO:0016021	P:cell tip growth; P:endosperm development; P:plasmodesmata-mediated intercellular transport; P:actin nucleation; P:seed morphogenesis; P:barbed-end actin filament capping; F:profilin binding; F:actin filament binding; C:cell wall; C:nucleolus; C:spindle; C:plasma membrane; C:plasmodesma; C:phragmoplast; C:integral component of membrane			IPR015425 (SMART); IPR015425 (PFAM); IPR042201 (G3DSA:1.20.58.GENE3D); IPR042201 (G3DSA:1.20.58.GENE3D); mobidb-lite (MOBIDB_LITE); mobidb-lite (MOBIDB_LITE); mobidb-lite (MOBIDB_LITE); mobidb-lite (MOBIDB_LITE); mobidb-lite (MOBIDB_LITE); mobidb-lite (MOBIDB_LITE); mobidb-lite (MOBIDB_LITE); PTHR23213:SF362 (PANTHER); PTHR23213 (PANTHER); PTHR23213:SF362 (PANTHER); TRANSMEMBRANE (PHOBIUS); NON_C…	no GO terms	no GO terms
TRINITY_DN63792_c0_g1_i1	RecName: Full=Heparanase; AltName: Full=Endo-glucoronidase; Contains: RecName: Full=Heparanase 8 kDa subunit; Contains: RecName: Full=Heparanase 50 kDa subunit; Flags: Precursor	472	12	0	51.47	27	P:GO:0007160; P:GO:0009826; P:GO:0010575; P:GO:0030194; P:GO:0030198; P:GO:0030200; P:GO:0030214; P:GO:0033690; P:GO:0043312; P:GO:0051798; P:GO:0051897; P:GO:0061042; F:GO:0004566; F:GO:0030305; F:GO:0033906; F:GO:0043395; F:GO:0045545; F:GO:0052748; C:GO:0005654; C:GO:0005765; C:GO:0005886; C:GO:0009505; C:GO:0031012; C:GO:0035580; C:GO:0043202; C:GO:0045121; C:GO:1904974	P:cell-matrix adhesion; P:unidimensional cell growth; P:positive regulation of vascular endothelial growth factor production; P:positive regulation of blood coagulation; P:extracellular matrix organization; P:heparan sulfate proteoglycan catabolic process; P:hyaluronan catabolic process; P:positive regulation of osteoblast proliferation; P:neutrophil degranulation; P:positive regulation of hair f…	EC:3.2.1.167; EC:3.2.1.31; EC:3.2.1.36	Baicalin-beta-D-glucuronidase; Beta-glucuronidase; Hyaluronoglucuronidase	G3DSA:3.20.20.80 (GENE3D); IPR005199 (PFAM); PTHR14363 (PANTHER); PTHR14363:SF34 (PANTHER); IPR017853 (SUPERFAMILY)	F:GO:0016798; C:GO:0016020	F:hydrolase activity, acting on glycosyl bonds; C:membrane
TRINITY_DN86460_c0_g2_i3	RecName: Full=Sodium/calcium exchanger NCL2; AltName: Full=Na(+)/Ca(2+)-exchange protein NCL2; AltName: Full=OsEFCAX2; AltName: Full=Protein NCX-like 2; Short=OsNCL2	103	3	5.60491e-21	67.97	12	P:GO:0006874; P:GO:0035725; P:GO:0070588; P:GO:0071472; F:GO:0005432; F:GO:0005509; F:GO:0015369; C:GO:0000325; C:GO:0005774; C:GO:0005886; C:GO:0009506; C:GO:0016021	P:cellular calcium ion homeostasis; P:sodium ion transmembrane transport; P:calcium ion transmembrane transport; P:cellular response to salt stress; F:calcium:sodium antiporter activity; F:calcium ion binding; F:calcium:proton antiporter activity; C:plant-type vacuole; C:vacuolar membrane; C:plasma membrane; C:plasmodesma; C:integral component of membrane			PTHR10891 (PANTHER); PTHR10891:SF848 (PANTHER); NON_CYTOPLASMIC_DOMAIN (PHOBIUS); NON_CYTOPLASMIC_DOMAIN (PHOBIUS); TRANSMEMBRANE (PHOBIUS); TRANSMEMBRANE (PHOBIUS); TRANSMEMBRANE (PHOBIUS); CYTOPLASMIC_DOMAIN (PHOBIUS); CYTOPLASMIC_DOMAIN (PHOBIUS); TMhelix (TMHMM); TMhelix (TMHMM); TMhelix (TMHMM)	no GO terms	no GO terms
TRINITY_DN91219_c2_g3_i3	RecName: Full=Squamosa promoter-binding-like protein 15	805	9	0	57.32	12	P:GO:0035874; P:GO:0042742; P:GO:0045893; P:GO:0048638; F:GO:0000976; F:GO:0003700; F:GO:0042803; F:GO:0046872; C:GO:0005737; C:GO:0005886; C:GO:0016607; C:GO:0042025	P:cellular response to copper ion starvation; P:defense response to bacterium; P:positive regulation of transcription, DNA-templated; P:regulation of developmental growth; F:transcription regulatory region sequence-specific DNA binding; F:DNA-binding transcription factor activity; F:protein homodimerization activity; F:metal ion binding; C:cytoplasm; C:plasma membrane; C:nuclear speck; C:host cel…			mobidb-lite (MOBIDB_LITE); mobidb-lite (MOBIDB_LITE); mobidb-lite (MOBIDB_LITE); mobidb-lite (MOBIDB_LITE); PTHR31251 (PANTHER); PTHR31251:SF110 (PANTHER); TRANSMEMBRANE (PHOBIUS); NON_CYTOPLASMIC_DOMAIN (PHOBIUS); CYTOPLASMIC_DOMAIN (PHOBIUS); TMhelix (TMHMM)	no GO terms	no GO terms
TRINITY_DN86620_c0_g1_i1	RecName: Full=QWRF motif-containing protein 9	126	9	1.0069e-36	64.68	8	P:GO:0009658; P:GO:0009960; P:GO:0010342; P:GO:0051225; P:GO:0051301; F:GO:0008017; C:GO:0005777; C:GO:0005880	P:chloroplast organization; P:endosperm development; P:endosperm cellularization; P:spindle assembly; P:cell division; F:microtubule binding; C:peroxisome; C:nuclear microtubule			IPR007573 (PFAM); PTHR31807:SF38 (PANTHER); PTHR31807 (PANTHER)	no GO terms	no GO terms
TRINITY_DN91623_c4_g3_i3	RecName: Full=Zinc finger protein CONSTANS-LIKE 14	316	20	9.58026e-62	55.88	27	P:GO:0007623; P:GO:0009658; P:GO:0009909; P:GO:0010018; P:GO:0010100; P:GO:0010117; P:GO:0010161; P:GO:0010200; P:GO:0030154; P:GO:0045892; P:GO:0048576; P:GO:0048579; P:GO:0080167; P:GO:0090351; P:GO:1900458; P:GO:1902448; P:GO:1905157; P:GO:2000032; P:GO:2000306; F:GO:0000976; F:GO:0003700; F:GO:0003712; F:GO:0008270; F:GO:0030674; F:GO:0042802; C:GO:0005634; C:GO:0005886	P:circadian rhythm; P:chloroplast organization; P:regulation of flower development; P:far-red light signaling pathway; P:negative regulation of photomorphogenesis; P:photoprotection; P:red light signaling pathway; P:response to chitin; P:cell differentiation; P:negative regulation of transcription, DNA-templated; P:positive regulation of short-day photoperiodism, flowering; P:negative regulation …			IPR000315 (SMART); mobidb-lite (MOBIDB_LITE); PTHR31717:SF45 (PANTHER); PTHR31717 (PANTHER); IPR000315 (PROSITE_PROFILES); IPR000315 (PROSITE_PROFILES); IPR000315 (CDD); IPR000315 (CDD)	F:GO:0008270	F:zinc ion binding
TRINITY_DN89672_c0_g1_i5	RecName: Full=Aspartate--tRNA ligase, cytoplasmic; AltName: Full=Aspartyl-tRNA synthetase; Short=AspRS	98	20	8.38028e-55	73.68	19	P:GO:0002181; P:GO:0006422; P:GO:0046686; P:GO:0050832; P:GO:0065003; F:GO:0000287; F:GO:0003677; F:GO:0003723; F:GO:0004046; F:GO:0004815; F:GO:0005515; F:GO:0005524; F:GO:0050560; C:GO:0005634; C:GO:0005783; C:GO:0005829; C:GO:0009506; C:GO:0017101; C:GO:0045202	P:cytoplasmic translation; P:aspartyl-tRNA aminoacylation; P:response to cadmium ion; P:defense response to fungus; P:protein-containing complex assembly; F:magnesium ion binding; F:DNA binding; F:RNA binding; F:aminoacylase activity; F:aspartate-tRNA ligase activity; F:protein binding; F:ATP binding; F:aspartate-tRNA(Asn) ligase activity; C:nucleus; C:endoplasmic reticulum; C:cytosol; C:plasmode…	EC:6.1.1.12; EC:6.1.1.23; EC:3.5.1.14	Aspartate--tRNA ligase; Aspartate--tRNA(Asn) ligase; N-acyl-aliphatic-L-amino acid amidohydrolase	IPR002312 (PRINTS); G3DSA:3.30.930.10 (GENE3D); IPR004364 (PFAM); IPR004523 (PANTHER); PTHR43450:SF8 (PANTHER); IPR006195 (PROSITE_PROFILES); SSF55681 (SUPERFAMILY)	P:GO:0006418; P:GO:0006422; F:GO:0000166; F:GO:0004812; F:GO:0004815; F:GO:0005524; C:GO:0005737	P:tRNA aminoacylation for protein translation; P:aspartyl-tRNA aminoacylation; F:nucleotide binding; F:aminoacyl-tRNA ligase activity; F:aspartate-tRNA ligase activity; F:ATP binding; C:cytoplasm
TRINITY_DN27025_c0_g2_i1	RecName: Full=Protopine 6-monooxygenase; AltName: Full=Protopine 6-hydroxylase; Short=P6H	130	20	1.41017e-59	70.58	24	P:GO:0002213; P:GO:0009617; P:GO:0016114; P:GO:0046246; P:GO:0050832; P:GO:0055114; P:GO:0071281; P:GO:0071456; P:GO:0097295; P:GO:0106146; P:GO:1901045; F:GO:0005506; F:GO:0016717; F:GO:0020037; F:GO:0047084; F:GO:0047087; F:GO:0047128; F:GO:0052582; F:GO:0097007; F:GO:0097008; F:GO:0106144; F:GO:0106149; C:GO:0005789; C:GO:0016021	P:defense response to insect; P:response to bacterium; P:terpenoid biosynthetic process; P:terpene biosynthetic process; P:defense response to fungus; P:oxidation-reduction process; P:cellular response to iron ion; P:cellular response to hypoxia; P:morphine biosynthetic process; P:sideretin biosynthesis; P:negative regulation of oviposition; F:iron ion binding; F:oxidoreductase activity, acting o…	EC:1.5.1.27; EC:1.14.14.97; EC:1.14.13; EC:1.14.14.143; EC:1.14.19; EC:1.14.14.98	1,2-dehydroreticulinium reductase (NADPH); Methyltetrahydroprotoberberine 14-monooxygenase; Acting on paired donors, with incorporation or reduction of molecular oxygen. The oxygen incorporated need not be derived from O(2); (+)-menthofuran synthase; Acting on paired donors, with incorporation or reduction of molecular oxygen. The oxygen incorporated need not be derived from O(2); Protopine 6-mon…	IPR002401 (PRINTS); IPR036396 (G3DSA:1.10.630.GENE3D); IPR001128 (PFAM); PTHR47947 (PANTHER); PTHR47947:SF1 (PANTHER); IPR017972 (PROSITE_PATTERNS); IPR036396 (SUPERFAMILY)	P:GO:0055114; F:GO:0005506; F:GO:0016705; F:GO:0020037	P:oxidation-reduction process; F:iron ion binding; F:oxidoreductase activity, acting on paired donors, with incorporation or reduction of molecular oxygen; F:heme binding
TRINITY_DN62654_c1_g2_i1	RecName: Full=Peroxidase 2; Flags: Precursor	130	20	1.49262e-72	72.55	22	P:GO:0002215; P:GO:0006979; P:GO:0009809; P:GO:0009827; P:GO:0010228; P:GO:0042744; P:GO:0044347; P:GO:0048511; P:GO:0048658; P:GO:0055114; P:GO:0080001; P:GO:0098869; F:GO:0004601; F:GO:0020037; F:GO:0046872; C:GO:0005576; C:GO:0005634; C:GO:0005773; C:GO:0005794; C:GO:0005829; C:GO:0009505; C:GO:0009506	P:defense response to nematode; P:response to oxidative stress; P:lignin biosynthetic process; P:plant-type cell wall modification; P:vegetative to reproductive phase transition of meristem; P:hydrogen peroxide catabolic process; P:cell wall polysaccharide catabolic process; P:rhythmic process; P:anther wall tapetum development; P:oxidation-reduction process; P:mucilage extrusion from seed coat; …	EC:1.11.1.7	Peroxidase	IPR002016 (PRINTS); IPR000823 (PRINTS); G3DSA:1.10.520.10 (GENE3D); G3DSA:1.10.420.10 (GENE3D); IPR002016 (PFAM); PTHR31388 (PANTHER); PTHR31388:SF188 (PANTHER); IPR019793 (PROSITE_PATTERNS); IPR002016 (PROSITE_PROFILES); IPR010255 (SUPERFAMILY)	P:GO:0006979; P:GO:0055114; F:GO:0004601; F:GO:0020037	P:response to oxidative stress; P:oxidation-reduction process; F:peroxidase activity; F:heme binding
TRINITY_DN90324_c3_g7_i1	RecName: Full=Isoflavone reductase; Short=IFR; AltName: Full=2'-hydroxyisoflavone reductase; AltName: Full=NADPH:isoflavone oxidoreductase	309	20	5.85433e-165	75.95	16	P:GO:0006952; P:GO:0006995; P:GO:0009807; P:GO:0010438; P:GO:0016036; P:GO:0033194; P:GO:0046686; P:GO:0055114; P:GO:1900057; F:GO:0010283; F:GO:0032442; F:GO:0047526; F:GO:0050664; F:GO:0070402; C:GO:0005737; C:GO:0005886	P:defense response; P:cellular response to nitrogen starvation; P:lignan biosynthetic process; P:cellular response to sulfur starvation; P:cellular response to phosphate starvation; P:response to hydroperoxide; P:response to cadmium ion; P:oxidation-reduction process; P:positive regulation of leaf senescence; F:pinoresinol reductase activity; F:phenylcoumaran benzylic ether reductase activity; F:…	EC:1.3.1.45	2'-hydroxyisoflavone reductase	Coil (COILS); G3DSA:3.40.50.720 (GENE3D); IPR008030 (PFAM); G3DSA:3.90.25.10 (GENE3D); PTHR43349:SF76 (PANTHER); PTHR43349 (PANTHER); cd05259 (CDD); IPR036291 (SUPERFAMILY)	no GO terms	no GO terms
TRINITY_DN151508_c0_g1_i1	RecName: Full=Gibberellin-regulated protein 9; AltName: Full=GAST1 protein homolog 9; Flags: Precursor	115	19	9.11902e-29	61.94	20	P:GO:0006952; P:GO:0009651; P:GO:0009737; P:GO:0009740; P:GO:0009741; P:GO:0009744; P:GO:0009749; P:GO:0009750; P:GO:0009751; P:GO:0009826; P:GO:0010286; P:GO:0045454; P:GO:0080167; P:GO:2000377; F:GO:0005515; C:GO:0005576; C:GO:0005737; C:GO:0005886; C:GO:0009505; C:GO:0009506	P:defense response; P:response to salt stress; P:response to abscisic acid; P:gibberellic acid mediated signaling pathway; P:response to brassinosteroid; P:response to sucrose; P:response to glucose; P:response to fructose; P:response to salicylic acid; P:unidimensional cell growth; P:heat acclimation; P:cell redox homeostasis; P:response to karrikin; P:regulation of reactive oxygen species metab…			IPR003854 (PFAM); PTHR23201:SF20 (PANTHER); PTHR23201 (PANTHER); SIGNAL_PEPTIDE_H_REGION (PHOBIUS); SIGNAL_PEPTIDE_N_REGION (PHOBIUS); NON_CYTOPLASMIC_DOMAIN (PHOBIUS); SIGNAL_PEPTIDE (PHOBIUS); SIGNAL_PEPTIDE_C_REGION (PHOBIUS); SignalP-noTM (SIGNALP_EUK); SignalP-TM (SIGNALP_GRAM_NEGATIVE); SignalP-TM (SIGNALP_GRAM_POSITIVE); TMhelix (TMHMM)	no GO terms	no GO terms
TRINITY_DN77507_c0_g2_i1	RecName: Full=Gibberellin-regulated protein 14; AltName: Full=GAST1 protein homolog 14; Flags: Precursor	235	17	1.68028e-26	57.94	12	P:GO:0006952; P:GO:0009651; P:GO:0009737; P:GO:0009740; P:GO:0009741; P:GO:0009826; P:GO:0045454; P:GO:2000377; F:GO:0005515; C:GO:0005576; C:GO:0005886; C:GO:0009505	P:defense response; P:response to salt stress; P:response to abscisic acid; P:gibberellic acid mediated signaling pathway; P:response to brassinosteroid; P:unidimensional cell growth; P:cell redox homeostasis; P:regulation of reactive oxygen species metabolic process; F:protein binding; C:extracellular region; C:plasma membrane; C:plant-type cell wall			PR01217 (PRINTS); IPR003854 (PFAM); mobidb-lite (MOBIDB_LITE); PTHR23201 (PANTHER); PTHR23201:SF53 (PANTHER); SIGNAL_PEPTIDE_H_REGION (PHOBIUS); SIGNAL_PEPTIDE (PHOBIUS); SIGNAL_PEPTIDE_N_REGION (PHOBIUS); SIGNAL_PEPTIDE_C_REGION (PHOBIUS); NON_CYTOPLASMIC_DOMAIN (PHOBIUS); SignalP-noTM (SIGNALP_EUK); SignalP-noTM (SIGNALP_GRAM_NEGATIVE)	no GO terms	no GO terms
TRINITY_DN71175_c0_g1_i1	RecName: Full=Retrovirus-related Pol polyprotein from transposon TNT 1-94; Includes: RecName: Full=Protease; Includes: RecName: Full=Reverse transcriptase; Includes: RecName: Full=Endonuclease	481	4	3.79038e-24	40.05	4	P:GO:0006259; F:GO:0005488; F:GO:0016740; F:GO:0016787	P:DNA metabolic process; F:binding; F:transferase activity; F:hydrolase activity			IPR001878 (SMART); PF14223 (PFAM); G3DSA:4.10.60.10 (GENE3D); mobidb-lite (MOBIDB_LITE); mobidb-lite (MOBIDB_LITE); mobidb-lite (MOBIDB_LITE); PTHR47592 (PANTHER); PTHR47592:SF11 (PANTHER); IPR001878 (PROSITE_PROFILES); IPR036875 (SUPERFAMILY)	F:GO:0003676; F:GO:0008270	F:nucleic acid binding; F:zinc ion binding
TRINITY_DN78782_c0_g1_i5	RecName: Full=Transcription factor bHLH7; AltName: Full=Basic helix-loop-helix protein 7; Short=AtbHLH7; Short=bHLH 7; AltName: Full=Transcription factor EN 92; AltName: Full=bHLH transcription factor bHLH007	131	6	9.89652e-12	57.22	9	P:GO:0009567; P:GO:0031347; P:GO:0045944; P:GO:0048235; P:GO:0048767; F:GO:0000976; F:GO:0001228; F:GO:0046983; C:GO:0005634	P:double fertilization forming a zygote and endosperm; P:regulation of defense response; P:positive regulation of transcription by RNA polymerase II; P:pollen sperm cell differentiation; P:root hair elongation; F:transcription regulatory region sequence-specific DNA binding; F:DNA-binding transcription activator activity, RNA polymerase II-specific; F:protein dimerization activity; C:nucleus			PTHR16223:SF109 (PANTHER); PTHR16223 (PANTHER); TRANSMEMBRANE (PHOBIUS); CYTOPLASMIC_DOMAIN (PHOBIUS); NON_CYTOPLASMIC_DOMAIN (PHOBIUS); TMhelix (TMHMM)	no GO terms	no GO terms
TRINITY_DN88172_c1_g1_i1	RecName: Full=Peroxisomal adenine nucleotide transporter 1	320	20	3.93731e-164	51.24	32	P:GO:0001561; P:GO:0006635; P:GO:0007031; P:GO:0015866; P:GO:0015867; P:GO:0015908; P:GO:0035349; P:GO:0035352; P:GO:0044375; P:GO:0046655; P:GO:0080024; P:GO:0080121; P:GO:0090351; P:GO:1902559; P:GO:1904947; P:GO:1990548; F:GO:0005347; F:GO:0008517; F:GO:0015217; F:GO:0015228; F:GO:0015230; F:GO:0015297; F:GO:0044610; F:GO:0051087; F:GO:0051724; F:GO:0080122; F:GO:1902557; C:GO:0005743; C:GO:00…	P:fatty acid alpha-oxidation; P:fatty acid beta-oxidation; P:peroxisome organization; P:ADP transport; P:ATP transport; P:fatty acid transport; P:coenzyme A transmembrane transport; P:NAD transmembrane transport; P:regulation of peroxisome size; P:folic acid metabolic process; P:indolebutyric acid metabolic process; P:AMP transport; P:seedling development; P:3'-phospho-5'-adenylyl sulfate transme…			IPR002067 (PRINTS); IPR023395 (G3DSA:1.50.40.GENE3D); IPR018108 (PFAM); PTHR46650:SF4 (PANTHER); PTHR46650 (PANTHER); IPR018108 (PROSITE_PROFILES); IPR018108 (PROSITE_PROFILES); IPR018108 (PROSITE_PROFILES); IPR023395 (SUPERFAMILY)	P:GO:0055085	P:transmembrane transport
TRINITY_DN88083_c3_g2_i3	RecName: Full=Peroxisomal membrane protein 13; AltName: Full=ABSTINENCE BY MUTUAL CONSENT; AltName: Full=Peroxin-13; Short=AtPEX13; AltName: Full=Peroxisome biogenesis protein 13; AltName: Full=Pex13p; AltName: Full=Protein ABERRANT PEROXISOME MORPHOLOGY 2; AltName: Full=Protein AMC	290	1	2.76801e-59	84	6	P:GO:0006635; P:GO:0016560; F:GO:0005515; C:GO:0005778; C:GO:0016021; C:GO:1990429	P:fatty acid beta-oxidation; P:protein import into peroxisome matrix, docking; F:protein binding; C:peroxisomal membrane; C:integral component of membrane; C:peroxisomal importomer complex			mobidb-lite (MOBIDB_LITE); mobidb-lite (MOBIDB_LITE); PTHR19332:SF8 (PANTHER); IPR035463 (PANTHER)	P:GO:0016560; C:GO:0005777; C:GO:0016021	P:protein import into peroxisome matrix, docking; C:peroxisome; C:integral component of membrane
TRINITY_DN88083_c3_g2_i4	RecName: Full=Peroxisomal membrane protein 13; AltName: Full=ABSTINENCE BY MUTUAL CONSENT; AltName: Full=Peroxin-13; Short=AtPEX13; AltName: Full=Peroxisome biogenesis protein 13; AltName: Full=Pex13p; AltName: Full=Protein ABERRANT PEROXISOME MORPHOLOGY 2; AltName: Full=Protein AMC	289	1	2.85889e-59	85.04	6	P:GO:0006635; P:GO:0016560; F:GO:0005515; C:GO:0005778; C:GO:0016021; C:GO:1990429	P:fatty acid beta-oxidation; P:protein import into peroxisome matrix, docking; F:protein binding; C:peroxisomal membrane; C:integral component of membrane; C:peroxisomal importomer complex			mobidb-lite (MOBIDB_LITE); mobidb-lite (MOBIDB_LITE); mobidb-lite (MOBIDB_LITE); PTHR19332:SF8 (PANTHER); IPR035463 (PANTHER)	P:GO:0016560; C:GO:0005777; C:GO:0016021	P:protein import into peroxisome matrix, docking; C:peroxisome; C:integral component of membrane
TRINITY_DN91878_c1_g8_i11	RecName: Full=Non-lysosomal glucosylceramidase; Short=NLGase; AltName: Full=Beta-glucocerebrosidase 2; Short=Beta-glucosidase 2; AltName: Full=Bile acid beta-glucosidase GBA2; AltName: Full=Bile acid glucosyl transferase GBA2; AltName: Full=Cholesterol glucosyltransferase GBA2; AltName: Full=Cholesteryl-beta-glucosidase GBA2; AltName: Full=Glucosylceramidase 2	649	4	5.86341e-95	57.03	18	P:GO:0006680; P:GO:0008203; P:GO:0008206; P:GO:0016139; P:GO:0021954; P:GO:0030259; P:GO:0030833; P:GO:0031113; P:GO:0097035; F:GO:0004348; F:GO:0046527; F:GO:0050295; C:GO:0005790; C:GO:0005829; C:GO:0005886; C:GO:0016021; C:GO:0042406; C:GO:0090498	P:glucosylceramide catabolic process; P:cholesterol metabolic process; P:bile acid metabolic process; P:glycoside catabolic process; P:central nervous system neuron development; P:lipid glycosylation; P:regulation of actin filament polymerization; P:regulation of microtubule polymerization; P:regulation of membrane lipid distribution; F:glucosylceramidase activity; F:glucosyltransferase activity;…	EC:3.2.1.104; EC:3.2.1.21; EC:3.2.1.45	Steryl-beta-glucosidase; Beta-glucosidase; Glucosylceramidase	IPR006775 (PFAM); IPR012341 (G3DSA:1.50.10.GENE3D); IPR024462 (PFAM); PTHR12654 (PANTHER); PTHR12654:SF28 (PANTHER); IPR008928 (SUPERFAMILY)	P:GO:0005975; F:GO:0004553	P:carbohydrate metabolic process; F:hydrolase activity, hydrolyzing O-glycosyl compounds
TRINITY_DN79592_c0_g2_i3	RecName: Full=NAD-specific glutamate dehydrogenase; Short=NAD-GDH	246	20	1.42227e-150	80.8	19	P:GO:0006538; P:GO:0006995; P:GO:0009409; P:GO:0009646; P:GO:0009651; P:GO:0010446; P:GO:0046686; P:GO:0051171; P:GO:0055114; P:GO:1901698; F:GO:0004352; F:GO:0005507; F:GO:0005515; F:GO:0005524; F:GO:0008270; F:GO:0050897; C:GO:0005759; C:GO:0005774; C:GO:0005794	P:glutamate catabolic process; P:cellular response to nitrogen starvation; P:response to cold; P:response to absence of light; P:response to salt stress; P:response to alkaline pH; P:response to cadmium ion; P:regulation of nitrogen compound metabolic process; P:oxidation-reduction process; P:response to nitrogen compound; F:glutamate dehydrogenase (NAD+) activity; F:copper ion binding; F:protein…	EC:1.4.1.3; EC:1.4.1.2	Glutamate dehydrogenase (NAD(P)(+)); Glutamate dehydrogenase	IPR006095 (PRINTS); G3DSA:3.40.50.10860 (GENE3D); IPR006097 (PFAM); G3DSA:3.40.50.720 (GENE3D); PTHR11606 (PANTHER); PTHR11606:SF34 (PANTHER); IPR033524 (PROSITE_PATTERNS); SSF53223 (SUPERFAMILY)	P:GO:0006520; P:GO:0055114; F:GO:0016491	P:cellular amino acid metabolic process; P:oxidation-reduction process; F:oxidoreductase activity
TRINITY_DN76053_c0_g1_i7	RecName: Full=Alpha-N-acetylglucosaminidase; AltName: Full=N-acetyl-glucosaminidase; Short=AtNAGLU; AltName: Full=Protein CYCLOPS 1; Flags: Precursor	808	2	0	67.71	11	P:GO:0006027; P:GO:0007040; P:GO:0009793; P:GO:0042474; P:GO:0045475; P:GO:0046548; P:GO:0051781; P:GO:0060119; F:GO:0004561; C:GO:0005764; C:GO:0070062	P:glycosaminoglycan catabolic process; P:lysosome organization; P:embryo development ending in seed dormancy; P:middle ear morphogenesis; P:locomotor rhythm; P:retinal rod cell development; P:positive regulation of cell division; P:inner ear receptor cell development; F:alpha-N-acetylglucosaminidase activity; C:lysosome; C:extracellular exosome	EC:3.2.1.50	Alpha-N-acetylglucosaminidase	G3DSA:3.20.20.80 (GENE3D); IPR024732 (PFAM); IPR024240 (PFAM); IPR029018 (G3DSA:3.30.379.GENE3D); IPR024733 (PFAM); G3DSA:1.20.120.670 (GENE3D); IPR007781 (PANTHER); PTHR12872:SF3 (PANTHER); SIGNAL_PEPTIDE (PHOBIUS); SIGNAL_PEPTIDE_H_REGION (PHOBIUS); SIGNAL_PEPTIDE_C_REGION (PHOBIUS); NON_CYTOPLASMIC_DOMAIN (PHOBIUS); SIGNAL_PEPTIDE_N_REGION (PHOBIUS); SignalP-noTM (SIGNALP_EUK)	no GO terms	no GO terms
TRINITY_DN82855_c1_g1_i8	RecName: Full=Transcription factor PIF1; AltName: Full=Basic helix-loop-helix protein 15; Short=AtbHLH15; Short=bHLH 15; AltName: Full=Protein PHY-INTERACTING FACTOR 1; AltName: Full=Protein PHYTOCHROME INTERACTING FACTOR 3-LIKE 5; AltName: Full=Transcription factor EN 101; AltName: Full=bHLH transcription factor bHLH015	507	20	1.28275e-63	69.49	35	P:GO:0006783; P:GO:0007623; P:GO:0009409; P:GO:0009567; P:GO:0009585; P:GO:0009641; P:GO:0009693; P:GO:0009704; P:GO:0009740; P:GO:0009742; P:GO:0009959; P:GO:0010047; P:GO:0010100; P:GO:0010161; P:GO:0010187; P:GO:0010218; P:GO:0010244; P:GO:0010600; P:GO:0010928; P:GO:0015995; P:GO:0031539; P:GO:0045944; P:GO:0048235; P:GO:0048440; P:GO:0048767; P:GO:0080006; P:GO:0080113; P:GO:0090229; F:GO:00…	P:heme biosynthetic process; P:circadian rhythm; P:response to cold; P:double fertilization forming a zygote and endosperm; P:red, far-red light phototransduction; P:shade avoidance; P:ethylene biosynthetic process; P:de-etiolation; P:gibberellic acid mediated signaling pathway; P:brassinosteroid mediated signaling pathway; P:negative gravitropism; P:fruit dehiscence; P:negative regulation of pho…			Coil (COILS); IPR011598 (SMART); IPR036638 (G3DSA:4.10.280.GENE3D); IPR011598 (PFAM); mobidb-lite (MOBIDB_LITE); mobidb-lite (MOBIDB_LITE); mobidb-lite (MOBIDB_LITE); mobidb-lite (MOBIDB_LITE); mobidb-lite (MOBIDB_LITE); mobidb-lite (MOBIDB_LITE); mobidb-lite (MOBIDB_LITE); PTHR45855:SF34 (PANTHER); IPR031066 (PANTHER); IPR011598 (PROSITE_PROFILES); IPR011598 (CDD); IPR036638 (SUPERFAMILY)	F:GO:0046983	F:protein dimerization activity
TRINITY_DN157134_c0_g1_i1	RecName: Full=Defensin-like protein; AltName: Full=8.4 kDa sulfur-rich protein; AltName: Full=Probable proteinase inhibitor P322; AltName: Full=Protein SE60; Flags: Precursor	74	19	5.97356e-10	71.29	5	P:GO:0031640; P:GO:0050832; C:GO:0005576; C:GO:0005618; C:GO:0009506	P:killing of cells of other organism; P:defense response to fungus; C:extracellular region; C:cell wall; C:plasmodesma			IPR008176 (PRINTS); IPR003614 (SMART); IPR036574 (G3DSA:3.30.30.GENE3D); PF00304 (PFAM); PTHR33147 (PANTHER); PTHR33147:SF108 (PANTHER); IPR008176 (PROSITE_PATTERNS); SIGNAL_PEPTIDE_N_REGION (PHOBIUS); NON_CYTOPLASMIC_DOMAIN (PHOBIUS); SIGNAL_PEPTIDE (PHOBIUS); SIGNAL_PEPTIDE_C_REGION (PHOBIUS); SIGNAL_PEPTIDE_H_REGION (PHOBIUS); SignalP-noTM (SIGNALP_EUK); SignalP-noTM (SIGNALP_GRAM_NEGATIVE); S…	P:GO:0006952	P:defense response
TRINITY_DN86578_c5_g2_i1	RecName: Full=Prostaglandin reductase 1; Short=PRG-1; AltName: Full=15-oxoprostaglandin 13-reductase; AltName: Full=Dithiolethione-inducible gene 1 protein; Short=D3T-inducible gene 1 protein; Short=DIG-1; AltName: Full=Leukotriene B4 12-hydroxydehydrogenase; AltName: Full=NAD(P)H-dependent alkenal/one oxidoreductase	109	20	3.40585e-38	59.35	20	P:GO:0006691; P:GO:0006693; P:GO:0006979; P:GO:0009636; P:GO:0016114; P:GO:0019439; P:GO:0042214; P:GO:0055114; P:GO:0097327; F:GO:0032440; F:GO:0036132; F:GO:0036185; F:GO:0047522; F:GO:0052579; F:GO:0052580; F:GO:0070402; F:GO:0097257; C:GO:0005634; C:GO:0005829; C:GO:0005886	P:leukotriene metabolic process; P:prostaglandin metabolic process; P:response to oxidative stress; P:response to toxic substance; P:terpenoid biosynthetic process; P:aromatic compound catabolic process; P:terpene metabolic process; P:oxidation-reduction process; P:response to antineoplastic agent; F:2-alkenal reductase [NAD(P)+] activity; F:13-prostaglandin reductase activity; F:13-lipoxin reduc…	EC:1.3.1.74; EC:1.3.1.81; EC:1.3.1.48	2-alkenal reductase (NAD(P)(+)); (+)-pulegone reductase; 15-oxoprostaglandin 13-reductase	G3DSA:3.90.180.10 (GENE3D); PTHR43205:SF49 (PANTHER); PTHR43205 (PANTHER); IPR036291 (SUPERFAMILY); IPR011032 (SUPERFAMILY)	no GO terms	no GO terms
TRINITY_DN86578_c5_g3_i1	RecName: Full=Prostaglandin reductase 1; Short=PRG-1; AltName: Full=15-oxoprostaglandin 13-reductase; AltName: Full=Dithiolethione-inducible gene 1 protein; Short=D3T-inducible gene 1 protein; Short=DIG-1; AltName: Full=Leukotriene B4 12-hydroxydehydrogenase; AltName: Full=NAD(P)H-dependent alkenal/one oxidoreductase	353	20	1.25539e-153	59.07	22	P:GO:0006691; P:GO:0006693; P:GO:0006979; P:GO:0009636; P:GO:0016114; P:GO:0019439; P:GO:0042214; P:GO:0055114; P:GO:0097327; F:GO:0005515; F:GO:0008270; F:GO:0032440; F:GO:0036132; F:GO:0036185; F:GO:0047522; F:GO:0052579; F:GO:0052580; F:GO:0070402; F:GO:0097257; C:GO:0005634; C:GO:0005829; C:GO:0005886	P:leukotriene metabolic process; P:prostaglandin metabolic process; P:response to oxidative stress; P:response to toxic substance; P:terpenoid biosynthetic process; P:aromatic compound catabolic process; P:terpene metabolic process; P:oxidation-reduction process; P:response to antineoplastic agent; F:protein binding; F:zinc ion binding; F:2-alkenal reductase [NAD(P)+] activity; F:13-prostaglandin…	EC:1.3.1.74; EC:1.3.1.81; EC:1.3.1.48	2-alkenal reductase (NAD(P)(+)); (+)-pulegone reductase; 15-oxoprostaglandin 13-reductase	IPR020843 (SMART); IPR013149 (PFAM); IPR041694 (PFAM); G3DSA:3.90.180.10 (GENE3D); G3DSA:3.40.50.720 (GENE3D); PTHR43205 (PANTHER); PTHR43205:SF48 (PANTHER); IPR036291 (SUPERFAMILY); IPR011032 (SUPERFAMILY); IPR011032 (SUPERFAMILY)	P:GO:0055114; F:GO:0016491	P:oxidation-reduction process; F:oxidoreductase activity
TRINITY_DN88211_c0_g1_i3	RecName: Full=Lipase; AltName: Full=Lip 42; AltName: Full=Thermostable organic solvent tolerant lipase; AltName: Full=Triacylglycerol hydrolase; Flags: Precursor	200	1	6.15517e-05	51.49	6	P:GO:0006629; P:GO:0016042; F:GO:0004806; F:GO:0016787; F:GO:0046872; C:GO:0005576	P:lipid metabolic process; P:lipid catabolic process; F:triglyceride lipase activity; F:hydrolase activity; F:metal ion binding; C:extracellular region			IPR029058 (G3DSA:3.40.50.GENE3D); PTHR34043:SF6 (PANTHER); PTHR34043 (PANTHER); SIGNAL_PEPTIDE_N_REGION (PHOBIUS); NON_CYTOPLASMIC_DOMAIN (PHOBIUS); SIGNAL_PEPTIDE_H_REGION (PHOBIUS); SIGNAL_PEPTIDE_C_REGION (PHOBIUS); SIGNAL_PEPTIDE (PHOBIUS)	no GO terms	no GO terms
TRINITY_DN16821_c0_g2_i1	RecName: Full=Putative lipid-transfer protein DIR1; AltName: Full=Protein DEFECTIVE IN INDUCED RESISTANCE 1; Flags: Precursor	105	1	2.31705e-15	62.67	8	P:GO:0006869; P:GO:0009862; F:GO:0005504; F:GO:0008270; F:GO:0043621; C:GO:0005783; C:GO:0009506; C:GO:0048046	P:lipid transport; P:systemic acquired resistance, salicylic acid mediated signaling pathway; F:fatty acid binding; F:zinc ion binding; F:protein self-association; C:endoplasmic reticulum; C:plasmodesma; C:apoplast			IPR016140 (SMART); G3DSA:1.10.110.10 (GENE3D); IPR016140 (PFAM); IPR039265 (PANTHER); PTHR33122:SF36 (PANTHER); SIGNAL_PEPTIDE (PHOBIUS); SIGNAL_PEPTIDE_C_REGION (PHOBIUS); SIGNAL_PEPTIDE_N_REGION (PHOBIUS); NON_CYTOPLASMIC_DOMAIN (PHOBIUS); SIGNAL_PEPTIDE_H_REGION (PHOBIUS); cd04660 (CDD); SignalP-noTM (SIGNALP_GRAM_NEGATIVE); SignalP-TM (SIGNALP_GRAM_POSITIVE); SignalP-noTM (SIGNALP_EUK); IPR03…	P:GO:0009627; F:GO:0005504	P:systemic acquired resistance; F:fatty acid binding
TRINITY_DN60818_c0_g2_i1	RecName: Full=Putative lipid-transfer protein DIR1; AltName: Full=Protein DEFECTIVE IN INDUCED RESISTANCE 1; Flags: Precursor	99	1	6.99493e-14	62.16	8	P:GO:0006869; P:GO:0009862; F:GO:0005504; F:GO:0008270; F:GO:0043621; C:GO:0005783; C:GO:0009506; C:GO:0048046	P:lipid transport; P:systemic acquired resistance, salicylic acid mediated signaling pathway; F:fatty acid binding; F:zinc ion binding; F:protein self-association; C:endoplasmic reticulum; C:plasmodesma; C:apoplast			IPR016140 (SMART); G3DSA:1.10.110.10 (GENE3D); IPR016140 (PFAM); IPR039265 (PANTHER); PTHR33122:SF63 (PANTHER); SIGNAL_PEPTIDE_C_REGION (PHOBIUS); SIGNAL_PEPTIDE (PHOBIUS); SIGNAL_PEPTIDE_H_REGION (PHOBIUS); SIGNAL_PEPTIDE_N_REGION (PHOBIUS); NON_CYTOPLASMIC_DOMAIN (PHOBIUS); cd04660 (CDD); SignalP-noTM (SIGNALP_EUK); IPR036312 (SUPERFAMILY); TMhelix (TMHMM)	P:GO:0009627; F:GO:0005504	P:systemic acquired resistance; F:fatty acid binding
TRINITY_DN61493_c0_g1_i1	RecName: Full=Putative lipid-transfer protein DIR1; AltName: Full=Protein DEFECTIVE IN INDUCED RESISTANCE 1; Flags: Precursor	102	1	1.34383e-17	60.71	8	P:GO:0006869; P:GO:0009862; F:GO:0005504; F:GO:0008270; F:GO:0043621; C:GO:0005783; C:GO:0009506; C:GO:0048046	P:lipid transport; P:systemic acquired resistance, salicylic acid mediated signaling pathway; F:fatty acid binding; F:zinc ion binding; F:protein self-association; C:endoplasmic reticulum; C:plasmodesma; C:apoplast			IPR016140 (SMART); G3DSA:1.10.110.10 (GENE3D); IPR016140 (PFAM); PTHR33122:SF63 (PANTHER); IPR039265 (PANTHER); TRANSMEMBRANE (PHOBIUS); NON_CYTOPLASMIC_DOMAIN (PHOBIUS); CYTOPLASMIC_DOMAIN (PHOBIUS); cd04660 (CDD); SignalP-noTM (SIGNALP_EUK); IPR036312 (SUPERFAMILY)	P:GO:0009627; F:GO:0005504	P:systemic acquired resistance; F:fatty acid binding
TRINITY_DN89842_c2_g2_i1	RecName: Full=Probable alpha/beta-glucosidase agdC; Flags: Precursor	879	20	0	59.64	37	P:GO:0000023; P:GO:0002026; P:GO:0002086; P:GO:0003007; P:GO:0005980; P:GO:0005983; P:GO:0005985; P:GO:0007040; P:GO:0007626; P:GO:0009888; P:GO:0010411; P:GO:0043181; P:GO:0043312; P:GO:0045493; P:GO:0046686; P:GO:0046716; P:GO:0050884; P:GO:0050885; P:GO:0060048; P:GO:0071555; F:GO:0008422; F:GO:0009044; F:GO:0016160; F:GO:0030246; F:GO:0032450; F:GO:0046556; F:GO:0061634; F:GO:0080176; F:GO:01…	P:maltose metabolic process; P:regulation of the force of heart contraction; P:diaphragm contraction; P:heart morphogenesis; P:glycogen catabolic process; P:starch catabolic process; P:sucrose metabolic process; P:lysosome organization; P:locomotory behavior; P:tissue development; P:xyloglucan metabolic process; P:vacuolar sequestering; P:neutrophil degranulation; P:xylan catabolic process; P:res…	EC:3.2.1.20; EC:3.2.1.21; EC:3.2.1.177; EC:3.2.1.55; EC:3.2.1.37	Alpha-glucosidase; Beta-glucosidase; Alpha-D-xyloside xylohydrolase; Non-reducing end alpha-L-arabinofuranosidase; Xylan 1,4-beta-xylosidase	G3DSA:2.60.40.1760 (GENE3D); IPR025887 (PFAM); G3DSA:3.20.20.80 (GENE3D); IPR013780 (G3DSA:2.60.40.GENE3D); IPR013780 (G3DSA:2.60.40.GENE3D); IPR000322 (PFAM); IPR031727 (PFAM); PTHR22762:SF154 (PANTHER); PTHR22762 (PANTHER); PTHR22762 (PANTHER); IPR030458 (PROSITE_PATTERNS); IPR030459 (PROSITE_PATTERNS); SIGNAL_PEPTIDE_C_REGION (PHOBIUS); SIGNAL_PEPTIDE (PHOBIUS); SIGNAL_PEPTIDE_N_REGION (PHOBIU…	P:GO:0005975; F:GO:0003824; F:GO:0004553; F:GO:0030246	P:carbohydrate metabolic process; F:catalytic activity; F:hydrolase activity, hydrolyzing O-glycosyl compounds; F:carbohydrate binding
TRINITY_DN83994_c0_g1_i3	RecName: Full=Outer plastidial membrane protein porin; AltName: Full=Voltage-dependent anion-selective channel protein; Short=VDAC	276	20	2.9004e-171	71.16	24	P:GO:0006839; P:GO:0007602; P:GO:0009060; P:GO:0009409; P:GO:0009626; P:GO:0010029; P:GO:0015698; P:GO:0030382; P:GO:0040008; P:GO:0042742; P:GO:0098656; F:GO:0005515; F:GO:0008308; F:GO:0015288; C:GO:0005618; C:GO:0005730; C:GO:0005774; C:GO:0005794; C:GO:0005886; C:GO:0009527; C:GO:0009941; C:GO:0016006; C:GO:0031307; C:GO:0046930	P:mitochondrial transport; P:phototransduction; P:aerobic respiration; P:response to cold; P:plant-type hypersensitive response; P:regulation of seed germination; P:inorganic anion transport; P:sperm mitochondrion organization; P:regulation of growth; P:defense response to bacterium; P:anion transmembrane transport; F:protein binding; F:voltage-gated anion channel activity; F:porin activity; C:ce…			IPR023614 (G3DSA:2.40.160.GENE3D); IPR027246 (PFAM); PTHR11743:SF50 (PANTHER); IPR001925 (PANTHER); IPR001925 (PROSITE_PATTERNS); cd07306 (CDD)	P:GO:0055085; P:GO:0098656; F:GO:0008308; C:GO:0005741	P:transmembrane transport; P:anion transmembrane transport; F:voltage-gated anion channel activity; C:mitochondrial outer membrane
TRINITY_DN92067_c4_g1_i4	RecName: Full=Protein transport protein sec1	517	20	0	55.13	78	P:GO:0000281; P:GO:0001678; P:GO:0001909; P:GO:0001956; P:GO:0002576; P:GO:0006886; P:GO:0007009; P:GO:0007271; P:GO:0007274; P:GO:0007317; P:GO:0007412; P:GO:0007420; P:GO:0009416; P:GO:0010447; P:GO:0010807; P:GO:0014047; P:GO:0016081; P:GO:0016188; P:GO:0022615; P:GO:0030073; P:GO:0030707; P:GO:0031340; P:GO:0031629; P:GO:0032229; P:GO:0032868; P:GO:0035544; P:GO:0043306; P:GO:0043312; P:GO:00…	P:mitotic cytokinesis; P:cellular glucose homeostasis; P:leukocyte mediated cytotoxicity; P:positive regulation of neurotransmitter secretion; P:platelet degranulation; P:intracellular protein transport; P:plasma membrane organization; P:synaptic transmission, cholinergic; P:neuromuscular synaptic transmission; P:regulation of pole plasm oskar mRNA localization; P:axon target recognition; P:brain…			IPR001619 (PIRSF); IPR001619 (PFAM); mobidb-lite (MOBIDB_LITE); PTHR11679:SF80 (PANTHER); IPR001619 (PANTHER); IPR036045 (SUPERFAMILY)	P:GO:0006904; P:GO:0016192	P:vesicle docking involved in exocytosis; P:vesicle-mediated transport
TRINITY_DN88018_c1_g1_i6	RecName: Full=Molybdate-anion transporter; AltName: Full=Major facilitator superfamily domain-containing protein 5; AltName: Full=Molybdate transporter 2 homolog	460	8	1.12625e-65	57.05	5	P:GO:0015689; F:GO:0005515; F:GO:0015098; C:GO:0005886; C:GO:0016021	P:molybdate ion transport; F:protein binding; F:molybdate ion transmembrane transporter activity; C:plasma membrane; C:integral component of membrane			IPR008509 (PFAM); G3DSA:1.20.1250.20 (GENE3D); IPR008509 (PANTHER); PTHR23516:SF19 (PANTHER); CYTOPLASMIC_DOMAIN (PHOBIUS); TRANSMEMBRANE (PHOBIUS); NON_CYTOPLASMIC_DOMAIN (PHOBIUS); CYTOPLASMIC_DOMAIN (PHOBIUS); TRANSMEMBRANE (PHOBIUS); CYTOPLASMIC_DOMAIN (PHOBIUS); TRANSMEMBRANE (PHOBIUS); NON_CYTOPLASMIC_DOMAIN (PHOBIUS); NON_CYTOPLASMIC_DOMAIN (PHOBIUS); TRANSMEMBRANE (PHOBIUS); CYTOPLASMIC_D…	P:GO:0015689; F:GO:0015098; C:GO:0016021	P:molybdate ion transport; F:molybdate ion transmembrane transporter activity; C:integral component of membrane
TRINITY_DN85963_c0_g1_i2	RecName: Full=Protein ALTERED PHOSPHATE STARVATION RESPONSE 1	149	3	6.51791e-24	59.04	7	P:GO:0007275; P:GO:0015706; P:GO:0030154; P:GO:0071249; F:GO:0005515; C:GO:0005634; C:GO:0005886	P:multicellular organism development; P:nitrate transport; P:cell differentiation; P:cellular response to nitrate; F:protein binding; C:nucleus; C:plasma membrane			Coil (COILS); PTHR21450 (PANTHER); PTHR21450:SF21 (PANTHER); NON_CYTOPLASMIC_DOMAIN (PHOBIUS); SIGNAL_PEPTIDE_C_REGION (PHOBIUS); SIGNAL_PEPTIDE (PHOBIUS); SIGNAL_PEPTIDE_N_REGION (PHOBIUS); SIGNAL_PEPTIDE_H_REGION (PHOBIUS)	no GO terms	no GO terms
TRINITY_DN90517_c0_g1_i5	RecName: Full=Ankyrin-3; Short=ANK-3; AltName: Full=Ankyrin-G	328	20	9.64305e-142	58.53	175	P:GO:0000122; P:GO:0000281; P:GO:0001955; P:GO:0002268; P:GO:0002315; P:GO:0002455; P:GO:0002467; P:GO:0003283; P:GO:0006275; P:GO:0006779; P:GO:0006887; P:GO:0006888; P:GO:0006897; P:GO:0007010; P:GO:0007130; P:GO:0007286; P:GO:0007411; P:GO:0007492; P:GO:0007528; P:GO:0007616; P:GO:0009267; P:GO:0009566; P:GO:0010225; P:GO:0010424; P:GO:0010638; P:GO:0010650; P:GO:0010881; P:GO:0010960; P:GO:00…	P:negative regulation of transcription by RNA polymerase II; P:mitotic cytokinesis; P:blood vessel maturation; P:follicular dendritic cell differentiation; P:marginal zone B cell differentiation; P:humoral immune response mediated by circulating immunoglobulin; P:germinal center formation; P:atrial septum development; P:regulation of DNA replication; P:porphyrin-containing compound biosynthetic p…	EC:2.1.1.43	Transferring one-carbon groups	IPR002110 (SMART); PF13857 (PFAM); IPR036770 (G3DSA:1.25.40.GENE3D); PTHR24180 (PANTHER); PTHR24180:SF29 (PANTHER); TRANSMEMBRANE (PHOBIUS); NON_CYTOPLASMIC_DOMAIN (PHOBIUS); CYTOPLASMIC_DOMAIN (PHOBIUS); NON_CYTOPLASMIC_DOMAIN (PHOBIUS); TRANSMEMBRANE (PHOBIUS); IPR002110 (PROSITE_PROFILES); IPR002110 (PROSITE_PROFILES); IPR020683 (PROSITE_PROFILES); IPR036770 (SUPERFAMILY); TMhelix (TMHMM); TMh…	F:GO:0005515	F:protein binding
TRINITY_DN118614_c0_g1_i1	RecName: Full=Thioredoxin; Short=Trx	107	20	3.32506e-23	62.53	42	P:GO:0000122; P:GO:0006515; P:GO:0006516; P:GO:0006517; P:GO:0006662; P:GO:0008340; P:GO:0009314; P:GO:0009409; P:GO:0010497; P:GO:0019379; P:GO:0030433; P:GO:0032148; P:GO:0033138; P:GO:0042744; P:GO:0043086; P:GO:0043388; P:GO:0045454; P:GO:0046826; P:GO:0048671; P:GO:0050832; P:GO:0051897; P:GO:0061692; P:GO:0071731; P:GO:1900409; P:GO:1903206; P:GO:1990355; P:GO:2000170; F:GO:0000224; F:GO:00…	P:negative regulation of transcription by RNA polymerase II; P:protein quality control for misfolded or incompletely synthesized proteins; P:glycoprotein catabolic process; P:protein deglycosylation; P:glycerol ether metabolic process; P:determination of adult lifespan; P:response to radiation; P:response to cold; P:plasmodesmata-mediated intercellular transport; P:sulfate assimilation, phosphoad…	EC:3.5.1.52; EC:1.8.1.9; EC:1.8.1.8	Peptide-N(4)-(N-acetyl-beta-glucosaminyl)asparagine amidase; Thioredoxin-disulfide reductase; Protein-disulfide reductase	PR00421 (PRINTS); IPR036249 (G3DSA:3.40.30.GENE3D); IPR013766 (PFAM); IPR005746 (PIRSF); PTHR46115:SF1 (PANTHER); PTHR46115 (PANTHER); IPR017937 (PROSITE_PATTERNS); IPR013766 (PROSITE_PROFILES); cd02947 (CDD); IPR036249 (SUPERFAMILY)	P:GO:0006662; P:GO:0045454; F:GO:0015035	P:glycerol ether metabolic process; P:cell redox homeostasis; F:protein disulfide oxidoreductase activity
TRINITY_DN87643_c2_g1_i17	RecName: Full=Ion channel CASTOR	440	9	1.71806e-123	71.4	6	P:GO:0009877; P:GO:0034220; F:GO:0042802; C:GO:0009941; C:GO:0016021; C:GO:0031965	P:nodulation; P:ion transmembrane transport; F:identical protein binding; C:chloroplast envelope; C:integral component of membrane; C:nuclear membrane			G3DSA:3.40.50.720 (GENE3D); mobidb-lite (MOBIDB_LITE); mobidb-lite (MOBIDB_LITE); mobidb-lite (MOBIDB_LITE); mobidb-lite (MOBIDB_LITE); PTHR31563 (PANTHER); PTHR31563:SF1 (PANTHER); TRANSMEMBRANE (PHOBIUS); TRANSMEMBRANE (PHOBIUS); CYTOPLASMIC_DOMAIN (PHOBIUS); NON_CYTOPLASMIC_DOMAIN (PHOBIUS); CYTOPLASMIC_DOMAIN (PHOBIUS); CYTOPLASMIC_DOMAIN (PHOBIUS); NON_CYTOPLASMIC_DOMAIN (PHOBIUS); TRANSMEMB…	no GO terms	no GO terms
TRINITY_DN41592_c0_g1_i1	RecName: Full=Putative germin-like protein 2-3; Flags: Precursor	218	20	1.03248e-93	76.99	7	P:GO:0055114; F:GO:0030145; F:GO:0045735; F:GO:0050162; C:GO:0005618; C:GO:0031012; C:GO:0048046	P:oxidation-reduction process; F:manganese ion binding; F:nutrient reservoir activity; F:oxalate oxidase activity; C:cell wall; C:extracellular matrix; C:apoplast	EC:1.2.3.4	Oxalate oxidase	IPR001929 (PRINTS); IPR006045 (SMART); IPR006045 (PFAM); IPR014710 (G3DSA:2.60.120.GENE3D); PTHR31238:SF225 (PANTHER); PTHR31238 (PANTHER); IPR019780 (PROSITE_PATTERNS); NON_CYTOPLASMIC_DOMAIN (PHOBIUS); SIGNAL_PEPTIDE_C_REGION (PHOBIUS); SIGNAL_PEPTIDE (PHOBIUS); SIGNAL_PEPTIDE_H_REGION (PHOBIUS); SIGNAL_PEPTIDE_N_REGION (PHOBIUS); SignalP-noTM (SIGNALP_EUK); SignalP-noTM (SIGNALP_GRAM_NEGATIVE)…	F:GO:0030145	F:manganese ion binding
TRINITY_DN3022_c0_g1_i1	RecName: Full=Germin-like protein subfamily 1 member 17; Flags: Precursor	131	20	4.86276e-55	80.24	7	P:GO:0055114; F:GO:0030145; F:GO:0045735; F:GO:0050162; C:GO:0005618; C:GO:0031012; C:GO:0048046	P:oxidation-reduction process; F:manganese ion binding; F:nutrient reservoir activity; F:oxalate oxidase activity; C:cell wall; C:extracellular matrix; C:apoplast	EC:1.2.3.4	Oxalate oxidase	IPR001929 (PRINTS); IPR006045 (SMART); IPR014710 (G3DSA:2.60.120.GENE3D); IPR006045 (PFAM); PTHR31238 (PANTHER); PTHR31238:SF140 (PANTHER); IPR019780 (PROSITE_PATTERNS); IPR011051 (SUPERFAMILY)	F:GO:0030145	F:manganese ion binding
TRINITY_DN3022_c1_g1_i1	RecName: Full=Germin-like protein subfamily 1 member 20; AltName: Full=GLP2a copy 2; AltName: Full=GLP2b; AltName: Full=Germin type 2; Short=At-GERM2; Short=AtGER2; Flags: Precursor	134	20	2.8301e-48	68.78	9	P:GO:0055114; F:GO:0030145; F:GO:0045735; F:GO:0050162; C:GO:0000325; C:GO:0005618; C:GO:0005886; C:GO:0031012; C:GO:0048046	P:oxidation-reduction process; F:manganese ion binding; F:nutrient reservoir activity; F:oxalate oxidase activity; C:plant-type vacuole; C:cell wall; C:plasma membrane; C:extracellular matrix; C:apoplast	EC:1.2.3.4	Oxalate oxidase	IPR006045 (PFAM); IPR014710 (G3DSA:2.60.120.GENE3D); PTHR31238 (PANTHER); PTHR31238:SF140 (PANTHER); IPR019780 (PROSITE_PATTERNS); SIGNAL_PEPTIDE (PHOBIUS); SIGNAL_PEPTIDE_C_REGION (PHOBIUS); NON_CYTOPLASMIC_DOMAIN (PHOBIUS); SIGNAL_PEPTIDE_N_REGION (PHOBIUS); SIGNAL_PEPTIDE_H_REGION (PHOBIUS); SignalP-noTM (SIGNALP_GRAM_NEGATIVE); SignalP-TM (SIGNALP_GRAM_POSITIVE); SignalP-noTM (SIGNALP_EUK); I…	F:GO:0030145	F:manganese ion binding
TRINITY_DN91761_c6_g15_i1	RecName: Full=Germin-like protein subfamily 1 member 7; Flags: Precursor	140	20	1.57512e-56	78.06	9	P:GO:0055114; F:GO:0030145; F:GO:0045735; F:GO:0050162; C:GO:0000325; C:GO:0005618; C:GO:0005886; C:GO:0031012; C:GO:0048046	P:oxidation-reduction process; F:manganese ion binding; F:nutrient reservoir activity; F:oxalate oxidase activity; C:plant-type vacuole; C:cell wall; C:plasma membrane; C:extracellular matrix; C:apoplast	EC:1.2.3.4	Oxalate oxidase	IPR001929 (PRINTS); IPR006045 (SMART); IPR014710 (G3DSA:2.60.120.GENE3D); IPR006045 (PFAM); PTHR31238:SF178 (PANTHER); PTHR31238 (PANTHER); IPR019780 (PROSITE_PATTERNS); IPR011051 (SUPERFAMILY)	F:GO:0030145	F:manganese ion binding
TRINITY_DN80365_c0_g2_i2	RecName: Full=Putative disease resistance protein RGA1; AltName: Full=RGA3-blb	721	20	3.63825e-107	48.98	13	P:GO:0009626; P:GO:0009817; P:GO:0050776; P:GO:0050829; F:GO:0004016; F:GO:0005524; F:GO:0043531; F:GO:0043621; C:GO:0005634; C:GO:0005737; C:GO:0009506; C:GO:0012505; C:GO:0019897	P:plant-type hypersensitive response; P:defense response to fungus, incompatible interaction; P:regulation of immune response; P:defense response to Gram-negative bacterium; F:adenylate cyclase activity; F:ATP binding; F:ADP binding; F:protein self-association; C:nucleus; C:cytoplasm; C:plasmodesma; C:endomembrane system; C:extrinsic component of plasma membrane	EC:4.6.1.1	Adenylate cyclase	PR00364 (PRINTS); IPR032675 (G3DSA:3.80.10.GENE3D); IPR002182 (PFAM); PTHR23155:SF1055 (PANTHER); PTHR23155 (PANTHER); IPR027417 (SUPERFAMILY); SSF52058 (SUPERFAMILY)	F:GO:0043531	F:ADP binding
TRINITY_DN56627_c0_g1_i1	RecName: Full=Lipid transfer protein EARLI 1; AltName: Full=Protein EARLY ARABIDOPSIS ALUMINUM INDUCED 1; Short=pEARLI1; Flags: Precursor	118	11	1.28438e-33	80.45	17	P:GO:0009626; P:GO:0009627; P:GO:0009631; P:GO:0009651; P:GO:0009682; P:GO:0009733; P:GO:0009737; P:GO:0010102; P:GO:0050832; P:GO:0070417; F:GO:0043621; C:GO:0005783; C:GO:0009505; C:GO:0009506; C:GO:0009707; C:GO:0016021; C:GO:0048046	P:plant-type hypersensitive response; P:systemic acquired resistance; P:cold acclimation; P:response to salt stress; P:induced systemic resistance; P:response to auxin; P:response to abscisic acid; P:lateral root morphogenesis; P:defense response to fungus; P:cellular response to cold; F:protein self-association; C:endoplasmic reticulum; C:plant-type cell wall; C:plasmodesma; C:chloroplast outer …			IPR016140 (SMART); IPR027923 (PFAM); G3DSA:1.10.110.10 (GENE3D); mobidb-lite (MOBIDB_LITE); mobidb-lite (MOBIDB_LITE); PTHR31731:SF82 (PANTHER); PTHR31731 (PANTHER); IPR027923 (CDD); IPR036312 (SUPERFAMILY)	no GO terms	no GO terms
TRINITY_DN16507_c0_g1_i1	RecName: Full=Senescence-specific cysteine protease SAG39; AltName: Full=Cysteine proteinase SAG39; AltName: Full=Protein SENESCENCE-ASSOCIATED GENE 39; Flags: Precursor	342	20	8.77823e-153	69.27	30	P:GO:0009555; P:GO:0009626; P:GO:0009723; P:GO:0009733; P:GO:0009735; P:GO:0009737; P:GO:0009739; P:GO:0009744; P:GO:0009749; P:GO:0009750; P:GO:0009817; P:GO:0010150; P:GO:0010224; P:GO:0010623; P:GO:0031667; P:GO:0048658; P:GO:0051603; P:GO:0080187; P:GO:1990169; F:GO:0004197; F:GO:0005515; C:GO:0005615; C:GO:0005634; C:GO:0005764; C:GO:0005788; C:GO:0005829; C:GO:0005886; C:GO:0009505; C:GO:00…	P:pollen development; P:plant-type hypersensitive response; P:response to ethylene; P:response to auxin; P:response to cytokinin; P:response to abscisic acid; P:response to gibberellin; P:response to sucrose; P:response to glucose; P:response to fructose; P:defense response to fungus, incompatible interaction; P:leaf senescence; P:response to UV-B; P:programmed cell death involved in cell develop…	EC:3.4.22; EC:3.4.22.1; EC:3.4.99; EC:3.4.22.41; EC:3.4.22.40; EC:3.4.22.34; EC:3.4.22.8; EC:3.4.22.28; EC:3.4.22.16; EC:3.4.22.27; EC:3.4.22.38; EC:3.4.22.15; EC:3.4.22.14	Acting on peptide bonds (peptidases); Cathepsin B; Acting on peptide bonds (peptidases); Cathepsin F; Bleomycin hydrolase; Legumain; Clostripain; Picornain 3C; Cathepsin H; Cathepsin S; Cathepsin K; Cathepsin L; Actinidain	IPR000668 (PRINTS); IPR013201 (SMART); IPR000668 (SMART); G3DSA:3.90.70.10 (GENE3D); IPR000668 (PFAM); IPR013201 (PFAM); PTHR12411:SF723 (PANTHER); PTHR12411 (PANTHER); IPR000169 (PROSITE_PATTERNS); IPR025660 (PROSITE_PATTERNS); IPR025661 (PROSITE_PATTERNS); SIGNAL_PEPTIDE_C_REGION (PHOBIUS); SIGNAL_PEPTIDE_H_REGION (PHOBIUS); NON_CYTOPLASMIC_DOMAIN (PHOBIUS); SIGNAL_PEPTIDE_N_REGION (PHOBIUS); S…	P:GO:0006508; F:GO:0008234	P:proteolysis; F:cysteine-type peptidase activity
TRINITY_DN89905_c2_g3_i1	RecName: Full=UDP-N-acetylglucosamine--peptide N-acetylglucosaminyltransferase 110 kDa subunit; AltName: Full=O-GlcNAc transferase subunit p110; AltName: Full=O-linked N-acetylglucosamine transferase 110 kDa subunit; Short=OGT	157	8	3.27492e-51	62.38	67	P:GO:0001934; P:GO:0005977; P:GO:0006041; P:GO:0006110; P:GO:0006111; P:GO:0006470; P:GO:0006493; P:GO:0006915; P:GO:0007584; P:GO:0009266; P:GO:0009910; P:GO:0010228; P:GO:0010801; P:GO:0016032; P:GO:0016485; P:GO:0016579; P:GO:0019915; P:GO:0030900; P:GO:0031397; P:GO:0032435; P:GO:0032922; P:GO:0033137; P:GO:0035020; P:GO:0040024; P:GO:0043981; P:GO:0043982; P:GO:0043984; P:GO:0045793; P:GO:00…	P:positive regulation of protein phosphorylation; P:glycogen metabolic process; P:glucosamine metabolic process; P:regulation of glycolytic process; P:regulation of gluconeogenesis; P:protein dephosphorylation; P:protein O-linked glycosylation; P:apoptotic process; P:response to nutrient; P:response to temperature stimulus; P:negative regulation of flower development; P:vegetative to reproductive…	EC:3.1.3.16; EC:2.4.1.94; EC:2.3.1.48; EC:2.4.1.255	Protein-serine/threonine phosphatase; Protein N-acetylglucosaminyltransferase; Histone acetyltransferase; Protein O-GlcNAc transferase	IPR019734 (SMART); IPR019734 (PFAM); IPR011990 (G3DSA:1.25.40.GENE3D); PTHR44366:SF4 (PANTHER); IPR037919 (PANTHER); IPR019734 (PROSITE_PROFILES); IPR019734 (PROSITE_PROFILES); IPR019734 (PROSITE_PROFILES); IPR013026 (PROSITE_PROFILES); IPR011990 (SUPERFAMILY)	P:GO:0006493; F:GO:0005515; F:GO:0016757	P:protein O-linked glycosylation; F:protein binding; F:transferase activity, transferring glycosyl groups
TRINITY_DN88180_c0_g1_i2	RecName: Full=Casein kinase I isoform alpha; Short=CKI-alpha; AltName: Full=CK1	674	20	0	61.97	69	P:GO:0001934; P:GO:0006282; P:GO:0007020; P:GO:0007030; P:GO:0009740; P:GO:0009908; P:GO:0010389; P:GO:0010845; P:GO:0018105; P:GO:0030100; P:GO:0032091; P:GO:0032436; P:GO:0032922; P:GO:0034067; P:GO:0042752; P:GO:0043278; P:GO:0043622; P:GO:0045104; P:GO:0045143; P:GO:0046777; P:GO:0048208; P:GO:0048512; P:GO:0048586; P:GO:0051225; P:GO:0051301; P:GO:0051510; P:GO:0060069; P:GO:0061512; P:GO:00…	P:positive regulation of protein phosphorylation; P:regulation of DNA repair; P:microtubule nucleation; P:Golgi organization; P:gibberellic acid mediated signaling pathway; P:flower development; P:regulation of G2/M transition of mitotic cell cycle; P:positive regulation of reciprocal meiotic recombination; P:peptidyl-serine phosphorylation; P:regulation of endocytosis; P:negative regulation of p…	EC:2.7.11; EC:2.7.11.26	Transferring phosphorus-containing groups; [Tau protein] kinase	IPR000719 (SMART); G3DSA:1.10.510.10 (GENE3D); IPR000719 (PFAM); PTHR11909:SF387 (PANTHER); PTHR11909 (PANTHER); IPR017441 (PROSITE_PATTERNS); IPR008271 (PROSITE_PATTERNS); IPR000719 (PROSITE_PROFILES); cd14016 (CDD); IPR011009 (SUPERFAMILY)	P:GO:0006468; F:GO:0004672; F:GO:0005524	P:protein phosphorylation; F:protein kinase activity; F:ATP binding
TRINITY_DN17387_c0_g2_i1	RecName: Full=Palmitoyl-protein thioesterase 1; Short=PPT-1; AltName: Full=Palmitoyl-protein hydrolase 1; Flags: Precursor	93	7	7.59196e-09	66.84	8	P:GO:0002084; P:GO:0006898; P:GO:0007005; P:GO:0009791; P:GO:0018991; P:GO:0044257; F:GO:0008474; C:GO:0005764	P:protein depalmitoylation; P:receptor-mediated endocytosis; P:mitochondrion organization; P:post-embryonic development; P:oviposition; P:cellular protein catabolic process; F:palmitoyl-(protein) hydrolase activity; C:lysosome	EC:3.1.2.22	Palmitoyl-protein hydrolase	IPR029058 (G3DSA:3.40.50.GENE3D); PF02089 (PFAM); PTHR11247 (PANTHER); PTHR11247:SF58 (PANTHER); IPR029058 (SUPERFAMILY)	no GO terms	no GO terms
TRINITY_DN91872_c2_g1_i5	RecName: Full=Clathrin interactor EPSIN 3; AltName: Full=EPSIN-related 3	557	3	8.63141e-58	51.27	12	P:GO:0006623; P:GO:0006897; F:GO:0002020; F:GO:0005543; F:GO:0030276; C:GO:0005770; C:GO:0005774; C:GO:0005794; C:GO:0005884; C:GO:0005886; C:GO:0009579; C:GO:0030125	P:protein targeting to vacuole; P:endocytosis; F:protease binding; F:phospholipid binding; F:clathrin binding; C:late endosome; C:vacuolar membrane; C:Golgi apparatus; C:actin filament; C:plasma membrane; C:thylakoid; C:clathrin vesicle coat			mobidb-lite (MOBIDB_LITE); mobidb-lite (MOBIDB_LITE); mobidb-lite (MOBIDB_LITE); PTHR12276 (PANTHER); PTHR12276 (PANTHER); PTHR12276:SF102 (PANTHER)	no GO terms	no GO terms
TRINITY_DN31800_c0_g1_i1	RecName: Full=Cation/H(+) antiporter 15; AltName: Full=Protein CATION/H+ EXCHANGER 15; Short=AtCHX15	491	20	1.60539e-130	53.42	16	P:GO:0006623; P:GO:0006814; P:GO:0006885; P:GO:0010183; P:GO:0030007; P:GO:0030104; P:GO:0071805; P:GO:1902600; F:GO:0005451; F:GO:0015079; F:GO:0015293; C:GO:0005770; C:GO:0005789; C:GO:0005886; C:GO:0016021; C:GO:0031969	P:protein targeting to vacuole; P:sodium ion transport; P:regulation of pH; P:pollen tube guidance; P:cellular potassium ion homeostasis; P:water homeostasis; P:potassium ion transmembrane transport; P:proton transmembrane transport; F:monovalent cation:proton antiporter activity; F:potassium ion transmembrane transporter activity; F:symporter activity; C:late endosome; C:endoplasmic reticulum me…			IPR038770 (G3DSA:1.20.1530.GENE3D); mobidb-lite (MOBIDB_LITE); mobidb-lite (MOBIDB_LITE); PTHR32468:SF68 (PANTHER); PTHR32468 (PANTHER); TRANSMEMBRANE (PHOBIUS); NON_CYTOPLASMIC_DOMAIN (PHOBIUS); NON_CYTOPLASMIC_DOMAIN (PHOBIUS); CYTOPLASMIC_DOMAIN (PHOBIUS); TRANSMEMBRANE (PHOBIUS); TMhelix (TMHMM); TMhelix (TMHMM)	no GO terms	no GO terms
TRINITY_DN84893_c2_g2_i1	RecName: Full=Transcription factor MYBS2; AltName: Full=Myb-related protein S2; Short=OsMYBS2	765	20	1.57735e-74	75.54	24	P:GO:0006508; P:GO:0009409; P:GO:0009734; P:GO:0009845; P:GO:0009909; P:GO:0010243; P:GO:0010600; P:GO:0032922; P:GO:0042753; P:GO:0042754; P:GO:0043254; P:GO:0043433; P:GO:0043966; P:GO:0045892; P:GO:0045944; P:GO:0048574; F:GO:0000976; F:GO:0003700; F:GO:0005515; F:GO:0008237; F:GO:0046872; F:GO:0070122; C:GO:0005737; C:GO:0016514	P:proteolysis; P:response to cold; P:auxin-activated signaling pathway; P:seed germination; P:regulation of flower development; P:response to organonitrogen compound; P:regulation of auxin biosynthetic process; P:circadian regulation of gene expression; P:positive regulation of circadian rhythm; P:negative regulation of circadian rhythm; P:regulation of protein-containing complex assembly; P:nega…			IPR001005 (SMART); IPR001005 (PFAM); IPR006447 (TIGRFAM); G3DSA:1.10.10.60 (GENE3D); mobidb-lite (MOBIDB_LITE); mobidb-lite (MOBIDB_LITE); mobidb-lite (MOBIDB_LITE); mobidb-lite (MOBIDB_LITE); mobidb-lite (MOBIDB_LITE); mobidb-lite (MOBIDB_LITE); mobidb-lite (MOBIDB_LITE); mobidb-lite (MOBIDB_LITE); mobidb-lite (MOBIDB_LITE); mobidb-lite (MOBIDB_LITE); PTHR12802 (PANTHER); PTHR12802:SF109 (PANTHE…	F:GO:0003677	F:DNA binding
TRINITY_DN88206_c3_g1_i5	RecName: Full=Casein kinase 1-like protein HD16; AltName: Full=Os03g0793500 protein; AltName: Full=Protein EARLY FLOWERING 1; AltName: Full=Protein HEADING DATE 16	400	20	0	63.05	47	P:GO:0006282; P:GO:0007623; P:GO:0009409; P:GO:0009640; P:GO:0009740; P:GO:0009741; P:GO:0009785; P:GO:0009850; P:GO:0009908; P:GO:0010845; P:GO:0018105; P:GO:0030100; P:GO:0030242; P:GO:0032436; P:GO:0035331; P:GO:0038083; P:GO:0042593; P:GO:0043622; P:GO:0045143; P:GO:0045879; P:GO:0045880; P:GO:0048364; P:GO:0048586; P:GO:0051510; P:GO:0060069; P:GO:0060628; P:GO:0090090; P:GO:2001159; F:GO:00…	P:regulation of DNA repair; P:circadian rhythm; P:response to cold; P:photomorphogenesis; P:gibberellic acid mediated signaling pathway; P:response to brassinosteroid; P:blue light signaling pathway; P:auxin metabolic process; P:flower development; P:positive regulation of reciprocal meiotic recombination; P:peptidyl-serine phosphorylation; P:regulation of endocytosis; P:autophagy of peroxisome; …	EC:2.7.10; EC:2.7.11; EC:2.7.12.1	Transferring phosphorus-containing groups; Transferring phosphorus-containing groups; Dual-specificity kinase	G3DSA:1.10.510.10 (GENE3D); PTHR11909 (PANTHER); PTHR11909:SF401 (PANTHER); IPR011009 (SUPERFAMILY)	no GO terms	no GO terms
TRINITY_DN84814_c0_g1_i5	RecName: Full=Outer envelope pore protein 24, chloroplastic; AltName: Full=Chloroplastic outer envelope pore protein of 24 kDa	189	5	8.5316e-61	68.32	7	P:GO:0034765; F:GO:0015288; F:GO:0022843; C:GO:0005739; C:GO:0031359; C:GO:0034426; C:GO:0046930	P:regulation of ion transmembrane transport; F:porin activity; F:voltage-gated cation channel activity; C:mitochondrion; C:integral component of chloroplast outer membrane; C:etioplast membrane; C:pore complex			IPR034626 (PANTHER); PTHR35284:SF5 (PANTHER)	P:GO:0034765; F:GO:0022843	P:regulation of ion transmembrane transport; F:voltage-gated cation channel activity
TRINITY_DN90559_c2_g1_i3	RecName: Full=Transcription factor BPE; AltName: Full=Basic helix-loop-helix protein 31; Short=AtbHLH31; Short=bHLH 31; AltName: Full=Protein BIG PETAL; AltName: Full=Transcription factor EN 88; AltName: Full=bHLH transcription factor bHLH031	255	20	1.16469e-67	76.05	15	P:GO:0009637; P:GO:0009740; P:GO:0009742; P:GO:0009911; P:GO:0040008; P:GO:0045944; P:GO:0048235; P:GO:0048446; P:GO:0048767; P:GO:1902448; P:GO:2000488; F:GO:0000976; F:GO:0001228; F:GO:0046983; C:GO:0005634	P:response to blue light; P:gibberellic acid mediated signaling pathway; P:brassinosteroid mediated signaling pathway; P:positive regulation of flower development; P:regulation of growth; P:positive regulation of transcription by RNA polymerase II; P:pollen sperm cell differentiation; P:petal morphogenesis; P:root hair elongation; P:positive regulation of shade avoidance; P:positive regulation of…			Coil (COILS); IPR011598 (SMART); IPR011598 (PFAM); IPR036638 (G3DSA:4.10.280.GENE3D); mobidb-lite (MOBIDB_LITE); mobidb-lite (MOBIDB_LITE); mobidb-lite (MOBIDB_LITE); mobidb-lite (MOBIDB_LITE); mobidb-lite (MOBIDB_LITE); IPR024097 (PANTHER); PTHR12565:SF366 (PANTHER); IPR011598 (PROSITE_PROFILES); IPR011598 (CDD); IPR036638 (SUPERFAMILY)	P:GO:0006355; F:GO:0046983	P:regulation of transcription, DNA-templated; F:protein dimerization activity
TRINITY_DN92791_c4_g1_i1	RecName: Full=Ribulose bisphosphate carboxylase small chain, chloroplastic; Short=RuBisCO small subunit; Flags: Precursor	181	20	1.50065e-108	85.07	16	P:GO:0009409; P:GO:0009853; P:GO:0016032; P:GO:0019253; P:GO:0055114; P:GO:0110102; F:GO:0004497; F:GO:0016984; F:GO:0019904; C:GO:0009506; C:GO:0009535; C:GO:0009570; C:GO:0022626; C:GO:0031969; C:GO:0031977; C:GO:0048046	P:response to cold; P:photorespiration; P:viral process; P:reductive pentose-phosphate cycle; P:oxidation-reduction process; P:ribulose bisphosphate carboxylase complex assembly; F:monooxygenase activity; F:ribulose-bisphosphate carboxylase activity; F:protein domain specific binding; C:plasmodesma; C:chloroplast thylakoid membrane; C:chloroplast stroma; C:cytosolic ribosome; C:chloroplast membra…	EC:4.1.1.39	Ribulose-bisphosphate carboxylase	IPR024681 (PRINTS); IPR000894 (SMART); IPR000894 (PFAM); IPR024680 (PFAM); IPR036385 (G3DSA:3.30.190.GENE3D); PTHR31262 (PANTHER); PTHR31262:SF10 (PANTHER); SIGNAL_PEPTIDE_N_REGION (PHOBIUS); SIGNAL_PEPTIDE (PHOBIUS); SIGNAL_PEPTIDE_H_REGION (PHOBIUS); SIGNAL_PEPTIDE_C_REGION (PHOBIUS); NON_CYTOPLASMIC_DOMAIN (PHOBIUS); IPR000894 (CDD); SignalP-TM (SIGNALP_GRAM_POSITIVE); IPR036385 (SUPERFAMILY)	no GO terms	no GO terms
TRINITY_DN78395_c4_g1_i2	RecName: Full=Nectarin-1; AltName: Full=Superoxide dismutase [Mn]; Flags: Precursor	218	20	4.26486e-112	77.16	12	P:GO:0009409; P:GO:0010497; P:GO:0019430; P:GO:0055114; P:GO:2000280; F:GO:0004784; F:GO:0030145; F:GO:0045735; C:GO:0005634; C:GO:0009505; C:GO:0009506; C:GO:0048046	P:response to cold; P:plasmodesmata-mediated intercellular transport; P:removal of superoxide radicals; P:oxidation-reduction process; P:regulation of root development; F:superoxide dismutase activity; F:manganese ion binding; F:nutrient reservoir activity; C:nucleus; C:plant-type cell wall; C:plasmodesma; C:apoplast	EC:1.15.1.1	Superoxide dismutase	IPR001929 (PRINTS); IPR006045 (SMART); IPR014710 (G3DSA:2.60.120.GENE3D); IPR006045 (PFAM); PTHR31238 (PANTHER); PTHR31238:SF199 (PANTHER); IPR019780 (PROSITE_PATTERNS); SIGNAL_PEPTIDE_C_REGION (PHOBIUS); NON_CYTOPLASMIC_DOMAIN (PHOBIUS); SIGNAL_PEPTIDE (PHOBIUS); SIGNAL_PEPTIDE_H_REGION (PHOBIUS); SIGNAL_PEPTIDE_N_REGION (PHOBIUS); SignalP-noTM (SIGNALP_GRAM_NEGATIVE); SignalP-noTM (SIGNALP_EUK)…	F:GO:0030145	F:manganese ion binding
TRINITY_DN121596_c0_g1_i1	RecName: Full=Chlorophyll a-b binding protein 1, chloroplastic; AltName: Full=LHCII type I CAB-1; Short=LHCP; Flags: Precursor	285	20	3.11991e-165	55.01	16	P:GO:0009409; P:GO:0009644; P:GO:0009645; P:GO:0009768; P:GO:0010207; P:GO:0018298; P:GO:0042221; F:GO:0016168; F:GO:0019904; F:GO:0046872; C:GO:0009517; C:GO:0009522; C:GO:0009523; C:GO:0009941; C:GO:0010287; C:GO:0016021	P:response to cold; P:response to high light intensity; P:response to low light intensity stimulus; P:photosynthesis, light harvesting in photosystem I; P:photosystem II assembly; P:protein-chromophore linkage; P:response to chemical; F:chlorophyll binding; F:protein domain specific binding; F:metal ion binding; C:PSII associated light-harvesting complex II; C:photosystem I; C:photosystem II; C:c…			IPR022796 (PFAM); IPR023329 (G3DSA:1.10.3460.GENE3D); IPR023329 (G3DSA:1.10.3460.GENE3D); PTHR21649:SF71 (PANTHER); IPR001344 (PANTHER); TRANSMEMBRANE (PHOBIUS); CYTOPLASMIC_DOMAIN (PHOBIUS); NON_CYTOPLASMIC_DOMAIN (PHOBIUS); CYTOPLASMIC_DOMAIN (PHOBIUS); TRANSMEMBRANE (PHOBIUS); SSF103511 (SUPERFAMILY)	P:GO:0009765; C:GO:0016020	P:photosynthesis, light harvesting; C:membrane
TRINITY_DN69596_c0_g1_i1	RecName: Full=Pectinesterase 3; Short=PE 3; AltName: Full=Pectin methylesterase 3; Flags: Precursor	206	20	6.12078e-45	56.2	25	P:GO:0009620; P:GO:0009624; P:GO:0009641; P:GO:0009827; P:GO:0010119; P:GO:0010214; P:GO:0043086; P:GO:0045490; P:GO:0050829; P:GO:1902183; P:GO:2000280; F:GO:0005515; F:GO:0030599; F:GO:0045330; F:GO:0046910; F:GO:0051722; C:GO:0000139; C:GO:0005768; C:GO:0005774; C:GO:0005802; C:GO:0005886; C:GO:0009505; C:GO:0009506; C:GO:0016021; C:GO:0048046	P:response to fungus; P:response to nematode; P:shade avoidance; P:plant-type cell wall modification; P:regulation of stomatal movement; P:seed coat development; P:negative regulation of catalytic activity; P:pectin catabolic process; P:defense response to Gram-negative bacterium; P:regulation of shoot apical meristem development; P:regulation of root development; F:protein binding; F:pectinester…	EC:3.1.1.11; EC:3.1.1.1	Pectinesterase; Carboxylesterase	IPR006501 (SMART); IPR006501 (PFAM); IPR035513 (G3DSA:1.20.140.GENE3D); IPR006501 (TIGRFAM); PTHR31080:SF216 (PANTHER); PTHR31080 (PANTHER); SIGNAL_PEPTIDE_C_REGION (PHOBIUS); SIGNAL_PEPTIDE (PHOBIUS); SIGNAL_PEPTIDE_N_REGION (PHOBIUS); NON_CYTOPLASMIC_DOMAIN (PHOBIUS); SIGNAL_PEPTIDE_H_REGION (PHOBIUS); cd15798 (CDD); SignalP-noTM (SIGNALP_EUK); IPR035513 (SUPERFAMILY); TMhelix (TMHMM)	F:GO:0004857	F:enzyme inhibitor activity
TRINITY_DN91246_c0_g1_i4	RecName: Full=Sucrose synthase; AltName: Full=Sucrose-UDP glucosyltransferase	320	20	0	87.08	15	P:GO:0001666; P:GO:0005982; P:GO:0005985; P:GO:0009414; P:GO:0009877; P:GO:0010037; P:GO:0010431; P:GO:0010555; P:GO:0051262; F:GO:0016157; C:GO:0005773; C:GO:0005829; C:GO:0005886; C:GO:0009505; C:GO:0042170	P:response to hypoxia; P:starch metabolic process; P:sucrose metabolic process; P:response to water deprivation; P:nodulation; P:response to carbon dioxide; P:seed maturation; P:response to mannitol; P:protein tetramerization; F:sucrose synthase activity; C:vacuole; C:cytosol; C:plasma membrane; C:plant-type cell wall; C:plastid membrane	EC:2.4.1.13	Sucrose synthase	G3DSA:3.40.50.2000 (GENE3D); IPR000368 (PFAM); G3DSA:1.20.120.1230 (GENE3D); PTHR45839 (PANTHER); PTHR45839:SF13 (PANTHER); cd03800 (CDD); SSF53756 (SUPERFAMILY)	P:GO:0005985; F:GO:0016157	P:sucrose metabolic process; F:sucrose synthase activity
TRINITY_DN79922_c0_g2_i1	RecName: Full=Probable sulfate transporter 3.5	643	20	0	63.78	36	P:GO:0002931; P:GO:0006817; P:GO:0007605; P:GO:0009751; P:GO:0009877; P:GO:0009970; P:GO:0010996; P:GO:0015711; P:GO:0015755; P:GO:0034766; P:GO:0035864; P:GO:0042391; P:GO:0042493; P:GO:0045793; P:GO:0090102; P:GO:0097066; P:GO:1902074; P:GO:1902358; P:GO:1902476; P:GO:2000147; F:GO:0003774; F:GO:0008134; F:GO:0008271; F:GO:0015106; F:GO:0015108; F:GO:0015293; F:GO:0015301; F:GO:0019001; F:GO:00…	P:response to ischemia; P:phosphate ion transport; P:sensory perception of sound; P:response to salicylic acid; P:nodulation; P:cellular response to sulfate starvation; P:response to auditory stimulus; P:organic anion transport; P:fructose transmembrane transport; P:negative regulation of ion transmembrane transport; P:response to potassium ion; P:regulation of membrane potential; P:response to d…	EC:3.6.1.15	Nucleoside-triphosphate phosphatase	IPR036513 (G3DSA:3.30.750.GENE3D); IPR011547 (PFAM); IPR001902 (TIGRFAM); IPR002645 (PFAM); IPR030316 (PTHR11814:PANTHER); IPR001902 (PANTHER); TRANSMEMBRANE (PHOBIUS); CYTOPLASMIC_DOMAIN (PHOBIUS); TRANSMEMBRANE (PHOBIUS); CYTOPLASMIC_DOMAIN (PHOBIUS); TRANSMEMBRANE (PHOBIUS); CYTOPLASMIC_DOMAIN (PHOBIUS); NON_CYTOPLASMIC_DOMAIN (PHOBIUS); TRANSMEMBRANE (PHOBIUS); CYTOPLASMIC_DOMAIN (PHOBIUS); N…	P:GO:0008272; P:GO:0055085; P:GO:1902358; F:GO:0008271; F:GO:0015116; C:GO:0016020; C:GO:0016021	P:sulfate transport; P:transmembrane transport; P:sulfate transmembrane transport; F:secondary active sulfate transmembrane transporter activity; F:sulfate transmembrane transporter activity; C:membrane; C:integral component of membrane
TRINITY_DN89111_c0_g4_i4	RecName: Full=Chlorophyll a-b binding protein 40, chloroplastic; AltName: Full=LHCII type I CAB-40; Short=LHCP; Flags: Precursor	264	20	0	94.02	11	P:GO:0009416; P:GO:0009768; P:GO:0018298; F:GO:0016168; F:GO:0046872; C:GO:0009522; C:GO:0009523; C:GO:0009535; C:GO:0009941; C:GO:0010287; C:GO:0016021	P:response to light stimulus; P:photosynthesis, light harvesting in photosystem I; P:protein-chromophore linkage; F:chlorophyll binding; F:metal ion binding; C:photosystem I; C:photosystem II; C:chloroplast thylakoid membrane; C:chloroplast envelope; C:plastoglobule; C:integral component of membrane			IPR022796 (PFAM); IPR023329 (G3DSA:1.10.3460.GENE3D); IPR001344 (PANTHER); PTHR21649:SF88 (PANTHER); SIGNAL_PEPTIDE_C_REGION (PHOBIUS); SIGNAL_PEPTIDE_H_REGION (PHOBIUS); SIGNAL_PEPTIDE (PHOBIUS); NON_CYTOPLASMIC_DOMAIN (PHOBIUS); SIGNAL_PEPTIDE_N_REGION (PHOBIUS); SSF103511 (SUPERFAMILY)	P:GO:0009765; C:GO:0016020	P:photosynthesis, light harvesting; C:membrane
TRINITY_DN89111_c0_g4_i5	RecName: Full=Chlorophyll a-b binding protein 2, chloroplastic; AltName: Full=LHCII type I CAB-2; Short=LHCP; Flags: Precursor	264	20	2.45932e-179	94.09	11	P:GO:0009416; P:GO:0009768; P:GO:0018298; F:GO:0016168; F:GO:0046872; C:GO:0009522; C:GO:0009523; C:GO:0009535; C:GO:0009941; C:GO:0010287; C:GO:0016021	P:response to light stimulus; P:photosynthesis, light harvesting in photosystem I; P:protein-chromophore linkage; F:chlorophyll binding; F:metal ion binding; C:photosystem I; C:photosystem II; C:chloroplast thylakoid membrane; C:chloroplast envelope; C:plastoglobule; C:integral component of membrane			IPR023329 (G3DSA:1.10.3460.GENE3D); IPR022796 (PFAM); IPR001344 (PANTHER); PTHR21649:SF88 (PANTHER); SSF103511 (SUPERFAMILY)	P:GO:0009765; C:GO:0016020	P:photosynthesis, light harvesting; C:membrane
TRINITY_DN89111_c0_g4_i1	RecName: Full=Chlorophyll a-b binding protein 40, chloroplastic; AltName: Full=LHCII type I CAB-40; Short=LHCP; Flags: Precursor	264	20	0	94.51	12	P:GO:0009416; P:GO:0009768; P:GO:0018298; F:GO:0005515; F:GO:0016168; F:GO:0046872; C:GO:0009522; C:GO:0009523; C:GO:0009535; C:GO:0009941; C:GO:0010287; C:GO:0016021	P:response to light stimulus; P:photosynthesis, light harvesting in photosystem I; P:protein-chromophore linkage; F:protein binding; F:chlorophyll binding; F:metal ion binding; C:photosystem I; C:photosystem II; C:chloroplast thylakoid membrane; C:chloroplast envelope; C:plastoglobule; C:integral component of membrane			IPR022796 (PFAM); IPR023329 (G3DSA:1.10.3460.GENE3D); PTHR21649:SF88 (PANTHER); IPR001344 (PANTHER); SIGNAL_PEPTIDE_C_REGION (PHOBIUS); SIGNAL_PEPTIDE_N_REGION (PHOBIUS); SIGNAL_PEPTIDE_H_REGION (PHOBIUS); NON_CYTOPLASMIC_DOMAIN (PHOBIUS); SIGNAL_PEPTIDE (PHOBIUS); SignalP-TM (SIGNALP_GRAM_POSITIVE); SSF103511 (SUPERFAMILY)	P:GO:0009765; C:GO:0016020	P:photosynthesis, light harvesting; C:membrane
TRINITY_DN38557_c1_g1_i1	RecName: Full=Ribulose bisphosphate carboxylase/oxygenase activase, chloroplastic; Short=RA; Short=RuBisCO activase; Flags: Precursor	475	20	0	84.23	13	P:GO:0009416; P:GO:0009753; P:GO:0010150; P:GO:0042742; P:GO:0043085; F:GO:0005524; F:GO:0042802; F:GO:0046863; C:GO:0005618; C:GO:0009579; C:GO:0009941; C:GO:0010287; C:GO:0010319	P:response to light stimulus; P:response to jasmonic acid; P:leaf senescence; P:defense response to bacterium; P:positive regulation of catalytic activity; F:ATP binding; F:identical protein binding; F:ribulose-1,5-bisphosphate carboxylase/oxygenase activator activity; C:cell wall; C:thylakoid; C:chloroplast envelope; C:plastoglobule; C:stromule			G3DSA:3.40.50.300 (GENE3D); IPR003959 (PFAM); G3DSA:1.10.8.1070 (GENE3D); PTHR32429 (PANTHER); PTHR32429:SF19 (PANTHER); IPR027417 (SUPERFAMILY)	F:GO:0005524; F:GO:0016887	F:ATP binding; F:ATPase activity
TRINITY_DN124037_c0_g1_i1	RecName: Full=Calvin cycle protein CP12-3, chloroplastic; AltName: Full=CP12 domain-containing protein 3; AltName: Full=Chloroplast protein 12-3; Flags: Precursor	138	4	8.05938e-37	67.48	16	P:GO:0009416; P:GO:0009744; P:GO:0018316; P:GO:0031334; P:GO:0034605; P:GO:0070417; P:GO:0071454; P:GO:0080153; F:GO:0005507; F:GO:0016151; F:GO:0019899; F:GO:0030674; C:GO:0009570; C:GO:0009941; C:GO:0032991; C:GO:0099080	P:response to light stimulus; P:response to sucrose; P:peptide cross-linking via L-cystine; P:positive regulation of protein-containing complex assembly; P:cellular response to heat; P:cellular response to cold; P:cellular response to anoxia; P:negative regulation of reductive pentose-phosphate cycle; F:copper ion binding; F:nickel cation binding; F:enzyme binding; F:protein-macromolecule adaptor…			IPR003823 (SMART); IPR003823 (PFAM); IPR039314 (PANTHER); PTHR33921:SF16 (PANTHER)	no GO terms	no GO terms
TRINITY_DN90193_c7_g1_i1	RecName: Full=CBL-interacting serine/threonine-protein kinase 1; AltName: Full=SNF1-related kinase 3.16; AltName: Full=SOS2-like protein kinase PKS13	440	20	0	73.35	26	P:GO:0007584; P:GO:0009409; P:GO:0009414; P:GO:0009611; P:GO:0009651; P:GO:0009737; P:GO:0009749; P:GO:0010118; P:GO:0010167; P:GO:0010555; P:GO:0035556; P:GO:0043266; P:GO:0046777; P:GO:0048364; P:GO:0051365; P:GO:0055075; P:GO:0071805; F:GO:0004674; F:GO:0005267; F:GO:0005515; F:GO:0005524; C:GO:0005634; C:GO:0005829; C:GO:0005886; C:GO:0009536; C:GO:0009705	P:response to nutrient; P:response to cold; P:response to water deprivation; P:response to wounding; P:response to salt stress; P:response to abscisic acid; P:response to glucose; P:stomatal movement; P:response to nitrate; P:response to mannitol; P:intracellular signal transduction; P:regulation of potassium ion transport; P:protein autophosphorylation; P:root development; P:cellular response to…	EC:2.7.11	Transferring phosphorus-containing groups	IPR000719 (SMART); G3DSA:3.30.310.80 (GENE3D); G3DSA:1.10.510.10 (GENE3D); IPR000719 (PFAM); IPR004041 (PFAM); PTHR43895 (PANTHER); PTHR43895:SF67 (PANTHER); IPR008271 (PROSITE_PATTERNS); IPR017441 (PROSITE_PATTERNS); IPR000719 (PROSITE_PROFILES); IPR018451 (PROSITE_PROFILES); cd12195 (CDD); IPR011009 (SUPERFAMILY)	P:GO:0006468; P:GO:0007165; F:GO:0004672; F:GO:0005524	P:protein phosphorylation; P:signal transduction; F:protein kinase activity; F:ATP binding
TRINITY_DN79148_c0_g1_i1	RecName: Full=Protein EARLY-RESPONSIVE TO DEHYDRATION 7, chloroplastic; Flags: Precursor	435	3	4.36207e-173	72.94	10	P:GO:0002239; P:GO:0007623; P:GO:0009409; P:GO:0009414; P:GO:0009644; P:GO:0009651; P:GO:0009737; C:GO:0005886; C:GO:0009506; C:GO:0009507	P:response to oomycetes; P:circadian rhythm; P:response to cold; P:response to water deprivation; P:response to high light intensity; P:response to salt stress; P:response to abscisic acid; C:plasma membrane; C:plasmodesma; C:chloroplast			IPR009686 (PFAM); PTHR21068:SF43 (PANTHER); PTHR21068 (PANTHER)	no GO terms	no GO terms
TRINITY_DN86781_c3_g7_i1	RecName: Full=Protein EARLY-RESPONSIVE TO DEHYDRATION 7, chloroplastic; Flags: Precursor	435	3	4.36207e-173	72.94	10	P:GO:0002239; P:GO:0007623; P:GO:0009409; P:GO:0009414; P:GO:0009644; P:GO:0009651; P:GO:0009737; C:GO:0005886; C:GO:0009506; C:GO:0009507	P:response to oomycetes; P:circadian rhythm; P:response to cold; P:response to water deprivation; P:response to high light intensity; P:response to salt stress; P:response to abscisic acid; C:plasma membrane; C:plasmodesma; C:chloroplast			IPR009686 (PFAM); PTHR21068:SF43 (PANTHER); PTHR21068 (PANTHER)	no GO terms	no GO terms
TRINITY_DN93383_c0_g1_i1	RecName: Full=Blue copper protein; Flags: Precursor	189	20	1.43655e-48	55.4	19	P:GO:0002239; P:GO:0006979; P:GO:0009610; P:GO:0009646; P:GO:0009856; P:GO:0015690; P:GO:0022900; P:GO:0048653; P:GO:0070417; P:GO:1901141; F:GO:0005515; F:GO:0009055; F:GO:0046872; C:GO:0005773; C:GO:0009506; C:GO:0016021; C:GO:0031012; C:GO:0046658; C:GO:0048046	P:response to oomycetes; P:response to oxidative stress; P:response to symbiotic fungus; P:response to absence of light; P:pollination; P:aluminum cation transport; P:electron transport chain; P:anther development; P:cellular response to cold; P:regulation of lignin biosynthetic process; F:protein binding; F:electron transfer activity; F:metal ion binding; C:vacuole; C:plasmodesma; C:integral com…			IPR003245 (PFAM); IPR008972 (G3DSA:2.60.40.GENE3D); mobidb-lite (MOBIDB_LITE); PTHR33021:SF308 (PANTHER); IPR039391 (PANTHER); TRANSMEMBRANE (PHOBIUS); SIGNAL_PEPTIDE_N_REGION (PHOBIUS); SIGNAL_PEPTIDE (PHOBIUS); SIGNAL_PEPTIDE_H_REGION (PHOBIUS); SIGNAL_PEPTIDE_C_REGION (PHOBIUS); NON_CYTOPLASMIC_DOMAIN (PHOBIUS); CYTOPLASMIC_DOMAIN (PHOBIUS); IPR003245 (PROSITE_PROFILES); cd04216 (CDD); SignalP…	F:GO:0009055	F:electron transfer activity
TRINITY_DN87394_c0_g1_i1	RecName: Full=Peroxidase 27; Short=Atperox P27; AltName: Full=ATP12a; AltName: Full=PRXR7; Flags: Precursor	329	20	4.54296e-137	64.93	23	P:GO:0006979; P:GO:0009269; P:GO:0009409; P:GO:0009808; P:GO:0009827; P:GO:0042538; P:GO:0042744; P:GO:0044347; P:GO:0045730; P:GO:0050832; P:GO:0055114; P:GO:0071456; P:GO:0080001; P:GO:0098869; F:GO:0004601; F:GO:0020037; F:GO:0046872; C:GO:0005634; C:GO:0005783; C:GO:0005794; C:GO:0009505; C:GO:0009506; C:GO:0048046	P:response to oxidative stress; P:response to desiccation; P:response to cold; P:lignin metabolic process; P:plant-type cell wall modification; P:hyperosmotic salinity response; P:hydrogen peroxide catabolic process; P:cell wall polysaccharide catabolic process; P:respiratory burst; P:defense response to fungus; P:oxidation-reduction process; P:cellular response to hypoxia; P:mucilage extrusion f…	EC:1.11.1.7	Peroxidase	IPR002016 (PRINTS); IPR000823 (PRINTS); G3DSA:1.10.420.10 (GENE3D); G3DSA:1.10.520.10 (GENE3D); IPR002016 (PFAM); PTHR31235:SF279 (PANTHER); PTHR31235 (PANTHER); IPR019793 (PROSITE_PATTERNS); IPR019794 (PROSITE_PATTERNS); NON_CYTOPLASMIC_DOMAIN (PHOBIUS); SIGNAL_PEPTIDE (PHOBIUS); SIGNAL_PEPTIDE_H_REGION (PHOBIUS); SIGNAL_PEPTIDE_N_REGION (PHOBIUS); SIGNAL_PEPTIDE_C_REGION (PHOBIUS); IPR002016 (P…	P:GO:0006979; P:GO:0042744; P:GO:0055114; F:GO:0004601; F:GO:0020037	P:response to oxidative stress; P:hydrogen peroxide catabolic process; P:oxidation-reduction process; F:peroxidase activity; F:heme binding
TRINITY_DN61912_c0_g2_i1	RecName: Full=IQ domain-containing protein IQM1; AltName: Full=IQ motif-containing protein 1	233	6	1.83417e-76	71.32	6	P:GO:0009651; P:GO:0009737; P:GO:0010119; F:GO:0005516; C:GO:0005634; C:GO:0009507	P:response to salt stress; P:response to abscisic acid; P:regulation of stomatal movement; F:calmodulin binding; C:nucleus; C:chloroplast			PTHR31250 (PANTHER); PTHR31250:SF53 (PANTHER)	no GO terms	no GO terms
TRINITY_DN78483_c0_g1_i1	RecName: Full=Uclacyanin 1; Flags: Precursor	157	20	1.19183e-23	53.23	14	P:GO:0009610; P:GO:0009856; P:GO:0009877; P:GO:0022900; P:GO:0048653; F:GO:0009055; F:GO:0046872; C:GO:0005773; C:GO:0009506; C:GO:0016021; C:GO:0031012; C:GO:0043661; C:GO:0046658; C:GO:0048046	P:response to symbiotic fungus; P:pollination; P:nodulation; P:electron transport chain; P:anther development; F:electron transfer activity; F:metal ion binding; C:vacuole; C:plasmodesma; C:integral component of membrane; C:extracellular matrix; C:peribacteroid membrane; C:anchored component of plasma membrane; C:apoplast			IPR008972 (G3DSA:2.60.40.GENE3D); IPR003245 (PFAM); mobidb-lite (MOBIDB_LITE); mobidb-lite (MOBIDB_LITE); IPR039391 (PANTHER); PTHR33021:SF396 (PANTHER); SIGNAL_PEPTIDE_H_REGION (PHOBIUS); SIGNAL_PEPTIDE (PHOBIUS); NON_CYTOPLASMIC_DOMAIN (PHOBIUS); SIGNAL_PEPTIDE_N_REGION (PHOBIUS); SIGNAL_PEPTIDE_C_REGION (PHOBIUS); IPR003245 (PROSITE_PROFILES); cd04216 (CDD); SignalP-noTM (SIGNALP_EUK); IPR0089…	F:GO:0009055	F:electron transfer activity
TRINITY_DN76803_c0_g1_i1	RecName: Full=Laccase-10; AltName: Full=Benzenediol:oxygen oxidoreductase 10; AltName: Full=Diphenol oxidase 10; AltName: Full=Urishiol oxidase 10; Flags: Precursor	559	20	0	72.38	9	P:GO:0009414; P:GO:0009809; P:GO:0009834; P:GO:0046274; P:GO:0046688; P:GO:0055114; F:GO:0005507; F:GO:0052716; C:GO:0048046	P:response to water deprivation; P:lignin biosynthetic process; P:plant-type secondary cell wall biogenesis; P:lignin catabolic process; P:response to copper ion; P:oxidation-reduction process; F:copper ion binding; F:hydroquinone:oxygen oxidoreductase activity; C:apoplast	EC:1.10.3; EC:1.10.3.2	Acting on diphenols and related substances as donors; Laccase	IPR011707 (PFAM); IPR008972 (G3DSA:2.60.40.GENE3D); IPR008972 (G3DSA:2.60.40.GENE3D); IPR011706 (PFAM); IPR001117 (PFAM); IPR017761 (TIGRFAM); IPR008972 (G3DSA:2.60.40.GENE3D); PTHR11709:SF368 (PANTHER); PTHR11709 (PANTHER); IPR002355 (PROSITE_PATTERNS); IPR033138 (PROSITE_PATTERNS); SIGNAL_PEPTIDE_C_REGION (PHOBIUS); NON_CYTOPLASMIC_DOMAIN (PHOBIUS); SIGNAL_PEPTIDE_H_REGION (PHOBIUS); SIGNAL_PEP…	P:GO:0046274; P:GO:0055114; F:GO:0005507; F:GO:0016491; F:GO:0052716; C:GO:0048046	P:lignin catabolic process; P:oxidation-reduction process; F:copper ion binding; F:oxidoreductase activity; F:hydroquinone:oxygen oxidoreductase activity; C:apoplast
TRINITY_DN89943_c0_g1_i2	RecName: Full=Abnormal spindle-like microcephaly-associated protein homolog	996	20	6.09782e-149	52.1	25	P:GO:0009414; P:GO:0009733; P:GO:0010150; P:GO:0014898; P:GO:0035307; P:GO:0042742; P:GO:0045944; P:GO:0050826; P:GO:0050832; P:GO:0050885; P:GO:0070417; P:GO:0070886; P:GO:0071275; P:GO:0106167; P:GO:1900367; F:GO:0000976; F:GO:0000981; F:GO:0003682; F:GO:0003713; F:GO:0005516; F:GO:0008134; F:GO:0042826; C:GO:0000785; C:GO:0005730; C:GO:0005829	P:response to water deprivation; P:response to auxin; P:leaf senescence; P:cardiac muscle hypertrophy in response to stress; P:positive regulation of protein dephosphorylation; P:defense response to bacterium; P:positive regulation of transcription by RNA polymerase II; P:response to freezing; P:defense response to fungus; P:neuromuscular process controlling balance; P:cellular response to cold; …			IPR000048 (SMART); IPR005559 (SMART); IPR002110 (SMART); IPR000048 (PFAM); IPR020683 (PFAM); IPR013783 (G3DSA:2.60.40.GENE3D); IPR036770 (G3DSA:1.25.40.GENE3D); G3DSA:1.20.5.190 (GENE3D); IPR002909 (PFAM); IPR005559 (PFAM); PTHR23335 (PANTHER); IPR002110 (PROSITE_PROFILES); IPR005559 (PROSITE_PROFILES); IPR000048 (PROSITE_PROFILES); IPR020683 (PROSITE_PROFILES); IPR000048 (PROSITE_PROFILES); cd00…	F:GO:0003677; F:GO:0005515	F:DNA binding; F:protein binding
[truncated: 55 more rows]

## Sheet: D
Enzyme Codes	GO Names
	C:chloroplast thylakoid membrane; C:plastoglobule; C:chloroplast membrane
	C:cytosol
	F:myosin XI tail binding; C:integral component of membrane; C:transport vesicle
	F:protein histidine kinase binding; C:Golgi apparatus; C:cytosol; C:plasma membrane; C:plasmodesma; C:plant-type vacuole membrane
[truncated: 91 more rows]
