# Supplementary material for: Identification of Gene Biomarkers for Tigilanol Tiglate Content in Fontainea picrosperma
Source: Molecules. 2022 Jun 21;27(13):3980. doi: 10.3390/molecules27133980 (PMC9268252; doi:10.3390/molecules27133980)
Supplement: Supplementary file 1 [file molecules-27-03980-s001.zip › Mitu et al_Supp File 2.xlsx]

## Sheet: Leaf
			List 1: Putative genes in EBC-46 Synthesis
Name	Log₂ fold change	FDR p-value	H3_5	H1_12	H2_312	L2_101	L3_310	L1_91	Sequences	Seq_size
Uncharacterized oxidoreductase	2.61442	0.00240762	24.2503	26.8544	21.8543	3.28249	3.0623	3.58274	TTTTAAATAGTTTAATGGATTTAATTAAAAAAAAAAAACATATTTATAACCACAATCGAA TTTGGTCTTATGCTTGAAAGACTTGTCCAAATTATCCTTTCTTTCTTGAATGCTACGTCA GCATCCCACATGAAAATATAGCCTCAACATTTCTATAAAAAATTTTAAATAGTTTAATGG ATTTAATTAAAAAAAAAAAACATATTTATAACCACAATCGAATTTGGTCTTATGCTTGAA AGACTTGTCCAAATTATCCTTTCTTTCTTAAGTAAAATTTATAACTTCTCAACAGGGAAG CCAATAACAGGTTGAATCTCCATTGCCATGGAGCGCAACTCATTTACCTCTTCACTCTCA AGTCTCCAACCAAGTGCGCCTGCAAATTCTGCA…	1258
UDP-D-xylose synthase 1	2.42326	0.0310915	16.7839	40.8368	16.007	3.616	4.64912	3.21576	TTGAATAACCATGTGATAGAATTTAAAATAATAATAAAAATAATTTAGTAAGTAATAAAG AACCGAAGAGGGTCAACAAATTAATACACATCCCTTGAAAAACAATAGAGGCTGAGGAAC GCCAAGCAAGCTTCTAAATGAACAGAACAAACTTTTGTATATTGCACCCAATATGTCGTA GCCTGTAGCTCAAAGAGACAAATTATAGCAACAAAATATACTTTTACTTGCCTAATAAGA ACCTTAATATCTTCTCATGAATAATTATAACATCCAAAACATAAGGTTCCTGAGGTACCG CAAGGCACTGTCTACTGACACTGGAAACACAGAAAAAAATTGTAGCGCATATAACCACTA ACAGATATTTAAGATTCCCTTAACAAAGAATTG…	1919
cytochrome P450 94C1	6.20705	0	27.6658	78.5849	12.6627	0	0.671509	0.594533	ATTTCTATCAAAAACATTAAAAGCTTCTCTCATATCTTTTTCTTGTTTAGTCTCTTCCTC CGTTTCTTGATTTTGTTTCAAATCTTTAGTTTCTTCCTTTTTCAATGGAGTTAAATTTAG ATTCTTGTTTATGGTTAGAATCGATTTCCAGCATTTTTTCTTTGCTTTTCTTTGGATTTA GCGTATTATTTTCTGTTTTTTCTTTGCTAATCTTTGTTTTAAGATTACAACCATGGTGTA ATTGTGAGGTTTGCAAAAGCTATGTCAATGCTTCTTGGACAAAAGATTTTGCAAATCTTT GTGATTGGTATACTCATCTTCTCAAAAAATCACCCACTGGTACAATTCATATTCATGTTC TTGGCAATATTATAACTTCAAATCAAGAAAATG…	1844
cyclin-T1-3-like	2.16852	0.00564758	40.2701	27.8897	36.2177	4.96343	8.75796	6.50337	TTTTTAATAAAATGTAAAACTTAAAATATGGGGTTTTATAAAATTTTACCCCCCCCTTTT TTTTTTTTTTTTTTTTTTTATAGTGTATCGTACAAGCAAATTTTCTAAGATATGCAAATG AATTACATATGAAATAGTTTGATGCCCTATATGGTAATTGACGAACTTTCTCATTCTAAA ATGTAAATAATTCAAACTCTATAATCTGATACTTTTAACGTTGGACATGAAATGACTTAT TCGTTCACTGGAAACAATACATGTAATAGCCCAACCCACGATTGTGCAATCATTCTATCT AGCTACAGTGTCGTAAAAAGAATAACAATTCCAGATCATAAAATATCATCAGCAAATGAT CTGTACACTTCATAAGTCGATCACGGTGCACCG…	1461
patatin-like protein 2	2.02685	0.0144485	20.543	38.3412	28.1883	4.25957	8.03918	5.82968	AATAAAATTACATTATTATTGTTATATATATATATTTTTTTTTTAAGGCACTTATATATT TATCTCTTATATATTTATCTCTTATCTCATTTAGTTATTCATAGACAAATTTATTAAAAA AATTATTCTTAGAAATTATAATTATTCTTAAAAATCATTTAGTTACAAATTATTCTTAGA AATGTGCGTAACTAAGTTTGATGACTAATTAAATCAACCAGTCATAGTTACTAATTATTC TTAGAAATGTCAAATTTTCAATTCTGTTGACGGAACTTCCGTTCTTCATGTAGACGGTAA GCAAAGGCAGAAAGAGCATCTCCATTGCTACGTTCTCCTTCAATACTTTCATGCAAACCA GTTTCTAAATTTACTCTCGACTCTGTTTTCTTC…	1797
putative disease resistance protein	10.9124	0.0100107	21.4834	53.8297	23.5383	0	0	0	AATTGGTGTAGAGACATTAATATATCTTTGGATGGCACAAGGGATATTAAGTTATCAAAT TCAAGCCAAAGCCTTGAAGGCATTGGAATGGAATATTTTAAAGAGCTGGCATGGAGGTCA TTTTTTCAAGACATAGAAAAGGATGATTTTGGTAATATAAGGTTGTGTAAAATGCATGAT CTAATGCATGATCTTGCAATGCAAGTTGGTGGAGAGGAAAGTGTTTGCATGGAGTCAGGT GATAATAATGAAAAAGCTTGACATATATCTTTAAATGCGAAAACTTCAGCCTCATTACAA CAATTCTTACCTACTTGTCTTGACAAAAAGAAATTACGAACCTTTCTTATGTTGAACGGA GGATGTCCTAATTTTATAATTGAGGTAGGGAAG…	1068
protein sulfur Dificiency induced 1	-5.4713	7.12908e-12	0.485531	1.5715	2.7818	127.116	48.7801	14.3961	GATTTGTTGTTGTCCTTTTATGGAACATACTAAGATGACTATAATTAAAGAAAAAATGGA AGTAGGAAAAACTAATATCTTATTCAGAAACCGAAATTTGTTTGTTGATTTTACAAACAA TTAACAGTTCTTACTCTAACAGTTCTTATTCATGAAAACACCCACACATGCATACACATA CATATACAAAGTTACCCTTATTACCTAAACGATGCTAAATCACAACAAAACAAACACTAT AACCTCCAAAACCGACAAATCTAAAACCCCCCACAATTTTTTTTTTTACTTTTTTTGGAT AAAATTTAACAAGCCAACTGATCCCTAAATGAAGAGATCTCTTCAAAAATAGGAAGCCTT TTAGATCTTGATGGAGCAAATTCATTAATCATT…	1320
Lower Sulfur 2	-3.09064	0.00109294	29.1547	43.1921	170.707	818.106	741.879	386.936	CTGGACATAATGAATGGAGTCTATAAATCGAAAGCAAAGCAATAAAGATACTACAGTTCA CAATTAACAAACAAACCAGTAAAGAAGCAGCTTTAGTAAAGAAGATAGAAATGGCGATAG GTAAAGTGGAGGAGAAAGAGCAGCAACAGACTTTGAAGAAGAGAAACGAGGAATTAGAGA AAGCTCTCAAAGAAAGTAAGCAAAGAGAAGAACAGATGAAAGAAGAGTTACAGAGAGCAT GGCGTAGACTCAGAGTGGCGGAGGAAGCGGAGGAAAGGCTTTGTTCTCAGCTCGGTGAAC TGGAAGCCGAAGCTGTTAATCAGGCGCGTGCTTATAACGCTCATATTCTTTCTCTTATGA ATCAGATTTCTCAGGCTCACAATCCGATCCGCC…	765
Serine/threonine-protein kinase	2.09811	0.00141835	34.4623	43.9925	27.818	5.60076	7.38487	7.7164	TTAATGGTAAAAAATGTGAAATTTTACAATTTGAGTATTTGTTTTGTCAATTAAATACAA ACACCAGCCAAAAATCATATATATATATATATAGCAATATGAATAATTGCTGCAAAAAGT TAATATACGGCAGCAATTGATAGAAATAATAACCGACATACCATATGATTTAGGGGATAT CAAAACATGCATTTGGGTTGCAAAGTTCGAACAAGTTATCACCCTCCCAAAATTGATTCA TTGACTTTGTTTTTGGACCGTACACAGTGGTTCTTTGATCGGACATGGATGGCACTTCAA TTTCCAATTCCATTCAATCATGCGATGATATAGACTTTTATGCAGAGATTATTCCTTTAT AAACCCTTCTTGTCCAGTTTCTATCAATCATTT…	2068
WRKY transcription factor 17	2.02267	0.00777423	98.6888	125.555	102.801	13.6949	24.4072	30.1653	AAAATTACAATTTGAGAACCCAAAAATACCTTTAAATTGTAACATAACTATTTTTTTTTT TTGGAATTTTAGTACCATTTAACTAAACTTTAGTTTAACAGACTAGTTCAAAAAAAATTA CAATTTGAGAACCCAATTTGTCTGCCAGATTGTGCGAGTTTGAAACGAGAAGCATCAGAG AGAGAGAGGTTCCTAAACTAATGCAGGAAAACAAGAGTGTTTTGAGGGGAAAATCAAGCA GTCAAAATCTCAAAAGGAAGTTCACGTTCTTTTCCTGTTCAAAATTCAATACAAAAGTTG TGTTTGACCATCCAAATGTTTATCATTTGCAGGTTTTTCTCCACTACTTCGCCATCTGTT GAATTGATGGGGAGATTAAGAAAAATAAAATCC…	2221

## Sheet: Root
			List 1: Putative genes in EBC-46 Synthesis
Name	Log₂ fold change	FDR p-value	H3_5	H1_12	H2_312	L2_101	L3_310	L1_91	Sequences	Sequence_size
2-alkenal reductase	9.04052	0	70.9	354.2	52	0	0.9	0	TTTATAATCATGTCTGATTCTTTCGGATTACCAACATTCACATGGTCTTTTAGTATCGCT CCGCTTTTGGAAGATATCAAGTTAAGAGAAATTGATAAATGGCTAATAATGGGAGAGAAG AGATGGTAAGAAACAAGCAGGTGATACTAAAAGACCATGTGAATGTTGGTAATCCGAAAG AATCAGACATGATTATAAATATTAATTCCGTCGAACTCAAAGTTCCACAAGGAAGTGAAG GTATTATTGTCAAGAATCTCTACCTTTCTTGTGATGCCTTCAATCGTATGCTTATGAAAG ATATCAAACAAAGAAATGAAGGATTTTCCAAATACAAGCCTGGTTCGCCTATGTATGGAT TTGGAGTCGCTAAGGTTATAGAATCTGGGAATC…	1560
Early respponse dehydration 7.1	6.06371	1.46111e-06	151.168	75.6688	95.1204	4.39539	0	0	TTATTGTAATTTCTAATTAATTATTGATAGATCCTTGAAAAAAATTGTACAACCCTCTAC TAAGGCTAATAATTATCAATATGTTTTAGCACATAAAATAGTTATTCTATTTTTAGACTA TCACGAATCTAAAGAGAAAATAATTCAAAAAAAAAATGAAGATAATAATGAGAATTTCTA AAAGAAAAAATCAGTAAATAATAAAAAGAATTATAGCAAGAACAGATTCGTAAACAATCC CAAACATCAAAAAACGAATCAATTTCTCACTCGGTCGAAGTGGGTTCATTATAATCCTAC TTCTACATATATTTCTTTTCCTCCCAAAAAAAAAAATAAATAAATAAATTTACATAAAGA AGAGGGGGGAAGGGTAAACGGTATCGTTTGCTA…	1875
Molybdate-anion transporter	2.79936	0.00671018	14.1519	71.5605	59.5522	6.21372	7.63311	8.01925	TATGCTCATTAATAAGTCCTTGACCTATTGAACCACCGACACAGAATAACAGCAAAATAC AATAAAATATTTTAGATCTCTCCTCGTTTCATCCAACCCCACGGATTCTGACATTGCAAA ACCATATACCGAGAAAACGCGTCGCTGTAGATTGATGTATTTTACTCTAAATTCATATAT AAATGATAGAATCTGAGTGCAGAGAGGATATATAACAAGAACAAAAAGAAAATCCTTTCT GAAAATCAGTAAGGAGAAATGGAGTTGTTTTTCTATTTGGTTTTTGTGGGATTAGGGGCA GTGGTGGCACTGCTGGAGCTTAGCAAGACAACCAAGGATAGAATCAACACCTCTCCTGCT TTCAATTCCTTCAAGAACAATTACCTTGTTGTT…	3000
promoter-binding-like protein 14	2.36724	0.01164	50.8872	69.5412	49.2161	8.17595	8.03398	17.9598	CAGGCCTAATAAAAGAGTCCGGTCTGGATCTCCAGGCACAGCTACCTATCCAATGTGTCA GGTAGATGACTGCAAGCAAGATCTATCAAATGCAAAGGACTATCACCGCCGCCATAAAGT GTGCGAGGTTCATAGCAAATCCTCTAAAGCCCTAGTCGCAAAGCAGATGCAGAGGTTTTG CCAGCAGTGTAGCAGGTTTCATCCACTTTCCGAGTTTGATGAGGGGAAGAGAAGTTGTAG GAGGAGGCTTGCTGGACACAATCGACGACGGAGGAAGACCCAGCCTGAGGATGTTACCTC ACGGCTGCTACTCCCTGGAAACCTTGATACAACCAGCACTGCAAATTTAGATGTAGTTAA CTTGTTAACTGCTCTGGTTCGCAATCAAGGTGA…	3456
sulfate transporter	3.1083	0.00361867	29.3725	24.1116	20.6292	2.1242	1.6139	5.20871	TCCTTCCTTTCTTTCCCCCTCTAACTTGAATGGGATCCGCCGTAGATCCTGTCCATAAGG TGAACTTTGCTACCCCAAGAAGTTTCACTGCCACACTCAAATCTCATTGCAAAGAAACTT TCTTTCCTGATGATCCATTCAGACAATTCAGAAACGATAAATCTTTTTCCAAATTCAAAA AAATAGTTCAATATTTTGTTCCTATTTTTCAATGGTTACCTCTTTATAATCTTCGTTCTT TCAAATTCGATTTGCTCGCCGGTATCACTATTACTTCTCTCGCCATTCCTCAAGGGATTA GCTACGCGAAACTCGCTAATCTCCCTCCTATTATCGGCCTATACTCGAGTTTCATCCCTC CTCTTGTTTATGCCATATTCGGAAATTCGAAGC…	2217
Early respponse dehydration 7.2	2.61162	0.0265773	16.5339	16.8376	21.9247	3.52397	2.1139	3.60718	AGCAAATAAAAAAAATTAAAGATGTCTTCTTCAAAGTCTCTTTACCCGCAAGTAGATCTC TCAAACCCAGAAGCCATTTCTGCAACTTCTTCTTCTTCTTCTACTCTGTACCCTTCTGTT GACATGAAAGATGTGGCAGACAATCTTTTCCCTGAACAAGAAGCCATTGATTCAGAGTCT ATGAGTTCTCAACCTTATGAAGAAGCTTTAATTAGAGTTCCCGGAGCAATAGTCCACTTA ATTGAAAGAGATCGTAGCGTTCAACTTGCTTCTGGGGACCTCTCTATTATTAGTCTCAAA CAGGGTAATACAGTGGTTGCTGTTCTTGCTCGTGTTGGTGACGATGATATTCAATGGCCT TTGGCTAAAGATGAAGCGGTTGTTAAGCTTGAC…	2979
