# Supplementary material for: Identification of Gene Biomarkers for Tigilanol Tiglate Content in Fontainea picrosperma
Source: Molecules. 2022 Jun 21;27(13):3980. doi: 10.3390/molecules27133980 (PMC9268252; doi:10.3390/molecules27133980)
Supplement: Supplementary file 1 [file molecules-27-03980-s001.zip › Mitu et al_Supp File 3.xlsx]

## Sheet: qPCR EBC-46 Corelations
Sample	Average EBC-46	CYP94C1
H1	0.06889	0.711477
H2	0.047688	2.4042
H3	0.0309922	0.496164
H4	0.0258379	0.359283
H5	0.00791343	0.0345907
H6	0.0150349	0.14761
H7	0.039066	1.0859
L1	0.00652781	0.182993
L2	0.0111205	0.0309595
L3	0.00780071	0.0811384
L4	0.0349009	0.286291
L5	0.0452009	3.79006
Sample	Average EBC-46	Putative disease resistant protein RGA3 (R protein)
H1	0.06889	1.28714
H2	0.047688	0.8761
H3	0.0309922	1.48367
H4	0.0258379	3.13864
H5	0.00791343	0.78466
H6	0.0150349	0.846827
H7	0.039066	3.26972
L1	0.00652781	2.78976
L2	0.0111205	0.446007
L3	0.00780071	0.989752
L4	0.0349009	1.29161
L5	0.0452009	0.141529
Sample	Average EBC-46	Early response dehydration (ERD)
H1	0.06889	1.11342
H2	0.047688	5.87667
H3	0.0309922	0.0180107
H4	0.0258379	0.373065
H5	0.00791343	0.219785
H6	0.0150349	1.47853
H7	0.039066	1.18509
L1	0.00652781	1.69447
L2	0.0111205	0.0911361
L3	0.00780071	0.0419312
L4	0.0349009	3.2154
L5	0.0452009	2.22684
Sample	Average EBC-46	2alkenal reductase (2-ARD)
H1	0.06889	1.11042
H2	0.047688	2.79164
H3	0.0309922	0.809131
H4	0.0258379	0.00292694
H5	0.00791343	0.0475947
H6	0.0150349	1.35687
H7	0.039066	0.435611
L1	0.00652781	0.944056
L2	0.0111205	0.0826759
L3	0.00780071	0.31577
L4	0.0349009	0.758442
L5	0.0452009	1.20674
