# Supplementary material for: Identification of Gene Biomarkers for Tigilanol Tiglate Content in Fontainea picrosperma
Source: Molecules. 2022 Jun 21;27(13):3980. doi: 10.3390/molecules27133980 (PMC9268252; doi:10.3390/molecules27133980)
Supplement: Supplementary file 1 [file molecules-27-03980-s001.zip › Mitu et al_Supp File 5.xlsx]

## Sheet: Leaf
Name	Log₂ fold change	FDR p-value	H1_12	H2_312	H3_5	L1_91	L2_101	L3_310
DN84893	-12.1917	0.00356106	0	0	0	36.4344	14.6385	0
DN88136	-11.8729	0.00548268	0	0	0	66.8242	0	43.0852
DN90295	-10.596	0.0375228	0	0	0	3.93651	46.5609	0
DN83295	-10.1434	0.0392697	0	0	0	4.01868	1.20825	14.1475
DN89842	-9.85818	0.0515575	0	0	0	6.20548	5.97915	1.82122
DN80766	-9.84906	0.049836	0	0	0	4.36052	3.63439	2.10508
DN88546	-9.3141	2.10197e-05	0.0492751	0	0	0	15.4407	14.55
DN84195	-8.73945	1.18161e-05	0.0704902	0	0	19.2977	6.37263	2.68362
DN91639	-7.52846	0.00107701	0	0	0.0299206	2.07571	1.73973	2.28023
DN87270	-7.42635	6.37007e-08	0	0.0976693	0	9.51928	7.97511	2.28356
DN91219	-6.5291	0.0011271	0	0	0.386959	6.43541	23.8679	0
DN85797	-6.48015	0.0483268	0.0938976	0	0.0812294	0	13.148	0
DN92017	-6.37848	1.90845e-05	0	0.133664	0	9.02704	2.43069	0.937545
DN89848	-6.31494	0.00120478	5.95161	0	0	183.892	145.133	0
DN83439	-6.15975	0.00356106	0.353628	0.224709	0	9.30315	19.7106	11.4928
DN87284	-6.12467	0.00631491	0	0	0.224877	9.30315	5.03581	1.68964
DN71376	-5.98223	0.000238788	0	0	0.40119	4.47982	5.91058	12.1652
DN92189	-5.96745	0.0107694	0	0.0427969	0	1.77183	1.1445	0.43777
DN58871	-5.92511	0.00976452	0.108669	0	0	2.59082	1.73585	1.00906
DN91401	-5.79722	0.00302102	0	0.0624082	0	1.04965	2.15852	0.881564
DN66228	-5.72632	2.88728e-10	0.203904	0.172758	0.764376	5.92302	6.93002	40.0763
DN90504	-5.70415	0.00224639	0.27904	0	0	1.31907	1.75447	8.42091
DN87202	-5.63624	0.00374564	0	0.475706	0	15.9545	8.49415	0
DN92404	-5.4713	7.12908e-12	1.5715	2.7818	0.485531	14.3961	127.116	48.7801
DN77155	-5.38966	0.0141204	0.145503	0	0	2.43227	1.31871	0.945755
DN86302	-5.22092	0.0468625	0	0.285746	0	7.08574	4.33024	0
DN69253	-5.09809	0.0339428	0	1.33173	0	14.8174	31.9101	0
DN91713	-5.09081	0.0010701	0	0.413679	0	8.74171	5.01516	0.846304
DN85094	-4.97531	0.0133501	0	0.209929	0	1.31274	4.67839	1.12481
DN92396	-4.78775	0.007539	1.68375	1.06992	0	15.9188	42.6327	5.47212
DN89113	-4.68412	0.000761316	0	0.44693	0.152112	7.70969	5.61748	1.90485
DN86302	-4.56617	0.0368756	0	0	0.198832	1.6691	0.755112	1.63622
DN89113	-4.51832	0.0169327	5.66387	0	0.659589	3.55201	3.62786	5.66387
DN56393	-4.49294	0.0417335	0.388262	0	0	0.957587	4.02469	1.26183
DN81203	-4.4377	1.18161e-05	1.28578	0	0.635604	8.15443	9.19765	14.1564
DN71335	-4.41962	0.0273056	0.268263	0.681858	0.386784	16.1731	0	10.7112
DN81153	-4.41031	0.0273056	0	3.30638	0	20.3701	46.9897	3.45112
DN54842	-4.32674	0.0078122	47.6932	4.08622	0	48.0204	607.94	75.8831
DN55096	-4.2447	0.0144485	0	0.795213	1.73216	24.6918	12.9298	5.34535
DN29252	-4.19341	6.37007e-08	10.2186	36.0551	6.04842	149.006	461.175	278.416
DN86837	-4.13645	0.00109294	0.419984	1.0675	0.363322	15.5374	12.2184	1.71591
DN88683	-4.09678	0.0483268	0.215051	2.18643	1.11623	0.353594	37.86	18.1716
DN75457	-4.01059	0.00631491	0.813006	0.904078	0.52749	10.1929	11.8815	9.814
DN91021	-3.98755	4.61964e-10	3.06671	5.84612	3.35111	44.0544	82.504	45.1122
DN61647	-3.95592	0.000761316	0.932422	1.66977	0.586636	21.9514	19.6477	1.88904
DN91202	-3.86536	0.0539147	0.30165	0	0.365334	3.57107	2.4605	1.45652
DN82894	-3.83081	0.0303351	0	1.62333	0.401818	2.95941	10.6557	15.5268
DN91686	-3.81668	0.00100202	1.73887	0.872328	1.02924	16.0261	22.8929	1.86959
DN76514	-3.78459	0.00932975	0.572086	2.18116	7.8566	44.6217	74.9053	1.19523
DN87496	-3.67811	0.0511407	0.522647	0.498165	2.71281	21.9135	11.0131	7.03696
DN89212	-3.66644	0.0143308	7.79844	0.849503	0.96376	4.9458	17.5686	72.6199
DN90027	-3.49292	0.0468625	0.225183	1.64554	0.487006	12.9588	9.18386	3.13643
DN90794	-3.48785	0.00122922	2.62773	2.31613	3.44649	54.4953	21.2034	2.36129
DN76609	-3.42307	7.16125e-05	4.03368	3.93017	15.819	110.317	57.5783	44.1969
DN15961	-3.42188	0.00564758	1.03833	0.923718	1.16772	7.93877	15.1745	4.72435
DN65636	-3.31938	4.81574e-07	10.2333	14.4955	11.9881	131.979	139.843	40.9785
DN79878	-3.30411	0.0482833	0	10.6577	1.65822	31.5958	58.5666	29.368
DN78652	-3.24969	0.0216972	26.4154	17.4906	23.2356	19.8916	458.467	25.4558
DN66633	-3.10382	0.0155474	9.05221	4.23841	12.7768	28.2011	24.6123	137.142
DN91262	-3.0991	1.18161e-05	8.53167	11.2545	7.19378	27.257	117.16	52.9481
DN76702	-3.09064	0.00109294	43.1921	170.707	29.1547	386.936	818.106	741.879
DN73263	-3.08349	1.9114e-07	7.27898	3.25342	5.33639	47.0111	41.0077	19.5895
DN89894	-3.07325	0.0170164	0.880469	1.75838	2.17623	7.96232	10.1742	18.1033
DN91187	-3.06181	0.0177162	0.472821	1.5398	0.715804	3.98431	10.2846	6.53075
DN83077	-3.0549	0.00107701	4.43034	20.1444	4.76949	62.323	123.67	38.8528
DN79465	-3.03653	0.000422469	3.51531	15.0779	6.08209	68.2038	75.6268	42.4342
DN88159	-2.94038	0.0236543	1.89615	0.286878	0.624888	6.38387	7.05812	2.80871
DN91219	-2.93524	0.0205548	1.51899	2.54468	4.18108	22.024	25.0617	6.283
DN89867	-2.90801	0.00790418	2.69847	4.98825	8.06431	20.7728	43.6882	37.813
DN87350	-2.87821	0.000133779	1.1298	2.11153	2.41469	13.0856	16.195	6.47966
DN89015	-2.86324	0.0273003	3.57798	2.67481	3.27733	18.6872	24.6068	14.0712
DN92039	-2.84807	0.00399907	3.60554	4.1458	5.04997	26.6775	33.7277	17.5369
DN89745	-2.82965	0.000116882	10.8437	21.7277	14.4476	135.999	107.495	49.6099
DN83797	-2.82785	0.0367531	1.31752	18.7405	2.27954	45.9924	65.2383	43.5716
DN87442	-2.80045	0.0108207	2.8743	6.48388	4.60006	43.5975	31.5532	10.4089
DN91512	-2.7681	0.0376696	2.05792	16.0191	9.34646	81.2087	75.7704	13.0578
DN89481	-2.71373	0.00722951	8.50158	4.63049	8.40525	26.1266	64.2548	22.9308
DN91729	-2.70548	0.00507794	2.26214	11.1403	4.89237	59.8438	31.6866	18.6047
DN89965	-2.69885	0.0468625	17.0431	80.4502	30.3901	386.027	335.485	34.2347
DN85797	-2.66236	0.00404532	8.73542	4.6374	4.49587	25.5444	9.69582	60.4757
DN89815	-2.62539	0.00552762	1.58109	2.48779	4.55925	13.0602	11.2589	22.0919
DN79985	-2.61719	0.0403142	3.54069	3.47267	0.732457	18.1612	15.1728	7.14726
DN79554	-2.61069	0.00107701	31.0219	64.7141	21.893	139.598	286.889	217.748
DN80496	-2.57083	0.0310915	1.47889	3.35622	1.52305	11.9845	14.265	7.52008
DN78516	-2.56729	0.0111209	1.64178	5.68571	5.6101	37.0501	17.2975	14.1015
DN85129	-2.47056	0.00241136	8.56039	27.438	13.613	75.8615	115.52	56.1093
DN81481	-2.46221	0.00109294	4.6979	3.36431	7.87014	32.6143	15.257	25.5505
DN88241	-2.45588	0.0452286	161.489	221.63	244.838	329.625	2160.31	375.91
DN88241	-2.44094	0.0286105	5.86321	15.9132	11.7778	93.4636	54.2422	13.011
DN90788	-2.42091	0.00224913	6.33741	7.65704	5.09632	32.508	37.6776	16.9909
DN87454	-2.40308	0.0192639	7.98596	4.13775	4.78284	36.1601	24.0517	12.0929
DN80365	-2.36395	0.0315882	13.4136	5.86302	8.18313	19.9516	10.1718	88.9873
DN89044	-2.33914	0.0122567	5.79851	9.48588	4.16238	31.0365	29.0995	27.1504
DN86669	-2.32094	0.00139343	50.1304	51.0081	69.3051	278.188	299.669	133.46
DN75921	-2.3013	0.00107701	22.7399	19.9545	34.504	56.3812	101.084	165.906
DN46750	-2.25549	0.00641039	40.4622	58.2928	59.9449	294.466	247.42	104.957
DN85312	-2.20548	0.00537089	21.1672	31.3528	35.7202	152.818	140.334	53.4283
DN56400	-2.14716	0.0498335	2.24288	5.34455	3.9412	17.5747	15.055	12.8864
DN86737	-2.12622	0.0310915	31.4361	52.2932	28.5807	59.9189	248.933	116.389
DN63884	-2.08971	0.00956422	20.7857	12.3826	11.1135	29.2518	85.7536	37.4622
DN86580	-2.00164	0.0335988	16.4634	13.0461	11.7289	53.9799	31.5973	54.8541
DN89419	2.02267	0.00777423	125.555	102.801	98.6888	30.1653	13.6949	24.4072
DN87202	2.02685	0.0144485	38.3412	28.1883	20.543	5.82968	4.25957	8.03918
DN87202	2.03857	0.0392697	42.2367	30.7475	44.2245	6.4053	4.27394	13.7077
DN89249	2.06589	0.00109294	64.4334	41.6716	72.9734	10.5798	11.5635	13.2592
DN79758	2.07439	0.0524326	100.94	25.3189	93.2066	11.8777	5.72502	24.7857
DN78799	2.09811	0.00141835	43.9925	27.818	34.4623	7.7164	5.60076	7.38487
DN85969	2.10696	0.032267	34.3201	18.2435	13.703	5.7651	3.0843	3.7537
DN71391	2.13356	0.0377458	66.6709	53.0297	46.5386	9.07219	2.81287	21.0273
DN91021	2.13839	0.0265376	71.1586	8.19087	43.5801	6.59618	6.25845	8.73263
DN72227	2.16336	0.0110053	23.0929	10.7072	16.6319	3.31557	3.79282	1.84678
DN90759	2.16852	0.00564758	27.8897	36.2177	40.2701	6.50337	4.96343	8.75796
DN79031	2.17117	0.0483268	23.5259	12.7205	19.9819	5.55614	1.86081	2.85973
DN89113	2.1995	0.0261198	11.4191	16.2113	17.3959	1.96916	4.16496	2.17239
DN90155	2.23873	0.0528042	60.757	12.8691	52.4216	10.7927	1.63235	8.99393
DN107467	2.24321	0.0539147	17.0837	4.11521	15.8897	2.43259	1.29026	2.54019
DN80951	2.25885	0.00432146	379.179	79.9082	304.197	43.8808	34.8298	47.1833
DN82364	2.26849	0.00404532	39.0943	17.6834	26.0104	6.80829	2.53566	4.71086
DN57583	2.27894	0.0405243	58.0173	23.1715	32.9606	1.58199	4.70881	13.1331
DN84119	2.32066	0.0193475	44.8795	18.1873	20.8019	3.4415	2.05138	8.40695
DN85690	2.32999	0.0339985	20.6688	11.2496	14.7871	3.36976	1.60055	2.75332
DN92113	2.34066	0.00403511	32.7635	24.9391	23.2579	7.10695	2.703	3.6122
DN84668	2.36586	0.0508676	40.8368	16.007	16.7839	3.21576	3.616	4.64912
DN70841	2.42326	0.0310915	40.8368	16.007	16.7839	3.21576	3.616	4.64912
DN82036	2.43161	0.000920934	75.4587	59.2413	53.8416	5.36373	5.71854	19.0514
DN89542	2.44314	0.0335988	36.0124	11.4988	10.1779	2.50402	0.730711	5.43463
DN86669	2.46821	0.0448355	25.986	8.57382	26.6952	4.21108	2.29287	2.32015
DN78434	2.47062	0.00564758	146.935	36.3578	77.0791	5.68935	6.13202	26.2777
DN29548	2.49495	0.000460292	28.6245	14.7992	27.2438	4.05572	1.79363	4.58083
DN91356	2.50813	0.00187304	138.648	39.5503	53.4418	10.1193	6.94595	15.5268
DN66222	2.52574	0.00929466	119.025	43.8283	25.8736	7.77797	3.21545	15.8697
DN90702	2.54652	0.0112206	89.7564	11.9831	87.1397	8.10287	2.85847	14.9482
DN89496	2.55635	0.000460292	30.9806	10.7822	19.1773	2.83496	1.67426	3.91357
DN89603	2.55805	0.0298985	30.7894	4.03776	6.99618	1.75715	1.45283	2.19921
DN86179	2.5766	0.000552168	148.613	39.6287	60.4551	9.81777	9.92131	13.1424
DN88159	2.58308	3.79246e-05	54.4952	23.4113	41.8753	3.69131	4.18083	8.56692
DN70556	2.60304	0.00224913	61.7506	38.5486	43.2188	11.3522	2.32017	6.05085
DN90040	2.61442	0.00240762	26.8544	21.8543	24.2503	3.58274	3.28249	3.0623
DN69747	2.66681	0.0166489	13.9337	3.2409	8.68786	1.1239	0.822028	1.26941
DN71726	2.69007	0.00287184	41.7916	16.8283	29.0967	2.84782	1.59505	6.84811
DN86005	2.75535	0.0482833	30.6061	28.2961	11.0226	1.18789	1.16074	6.83045
DN75796	2.93177	0.00100202	37.0426	17.799	15.8247	2.63176	1.70969	3.29099
DN89162	2.9335	0.00790418	10.1081	4.22985	16.4224	1.36812	1.29875	0.515084
DN73980	2.93522	0.0368756	23.0071	11.5418	14.8559	4.0725	0.374132	0.81774
DN90095	2.9358	0.0144485	34.7655	11.494	18.6444	0.949193	1.0464	5.00308
DN71515	2.97476	0.00458454	20.0723	8.65777	23.7838	2.60028	1.32304	1.46847
DN75178	2.97569	0.0164078	42.0515	6.88385	30.8358	1.34071	0.712615	6.16536
DN84270	2.97869	0.000489464	185.067	34.0515	131.98	7.22212	5.97132	22.5683
DN88082	2.97874	0.00420753	46.0093	5.97684	14.5091	4.42533	0.924356	1.05227
DN28116	3.01343	0.00475741	13.412	4.93763	14.365	0.306283	0.940598	2.07563
DN90788	3.02091	0.00262017	43.4099	22.5968	27.0217	0.921829	2.93983	5.65213
DN129125	3.02472	0.00929466	40.6301	2.69166	31.5589	2.13208	0.998936	4.09383
DN82661	3.03357	0.0486625	15.3745	5.29495	6.65013	1.44728	1.11685	0
DN11688	3.0608	0.0328756	23.2151	14.004	19.065	0	2.83605	2.68216
DN126200	3.07038	0.000170666	61.9433	7.53833	38.5711	4.18917	3.51776	2.07006
DN84834	3.07071	0.0528042	15.8199	10.4415	6.80206	2.67083	0.544066	0
DN29855	3.10108	0.0310915	34.5054	28.6616	35.3129	7.23092	0	2.51296
DN86669	3.10959	0.021835	23.903	10.3036	11.8506	1.49393	0.380061	2.59594
DN57115	3.11006	2.10197e-05	52.3231	10.2594	37.2088	2.35269	1.27746	5.67155
DN90504	3.18176	0.00109294	87.8881	24.5825	39.1526	2.31584	1.27651	10.114
DN75869	3.1971	0.0214024	56.2058	6.34537	8.55631	0.390928	1.03431	4.59205
DN77269	3.2115	0.000724243	46.1127	8.30948	19.7331	1.2933	1.13615	3.92578
DN75745	3.22384	0.00241136	32.4409	9.49933	13.1963	0.418027	2.28115	1.8886
DN80534	3.24438	0.0249468	21.7898	4.80694	17.2851	0	1.78852	1.83243
DN78799	3.35248	0.0189134	7.85331	5.16695	4.26866	0.799898	0.425163	0.129066
DN878	3.38328	0.00747441	9.96103	10.4834	9.96358	0.341213	1.34006	0.674435
DN82661	3.41934	0.0249468	12.9283	6.6748	2.97077	0.332142	0.617891	0.750292
DN92141	3.43735	0.00799111	19.4529	2.68895	7.81319	1.29809	0.0858621	0.762405
DN79069	3.46854	0.0411241	3.72736	1.47779	3.22448	0	0.129929	0.50289
DN89717	3.49279	0.00173537	49.7962	12.0957	24.6348	1.25193	4.03693	0.424208
DN90911	3.55284	1.90845e-05	151.852	18.1289	161.937	11.5004	2.62738	8.20381
DN91258	3.59487	0.0307887	27.8091	3.86553	6.95405	0.803752	0	1.71477
DN55211	3.60436	0.00343908	31.9999	2.40924	22.6316	0.311702	0.463893	2.9573
DN6084	3.64729	0.00100202	102.669	12.3561	93.5277	3.51691	2.11478	7.58341
DN58270	3.65648	0.0313934	5.592	0.581055	2.22102	0.144568	0.0478122	0.326572
DN143481	3.66383	0.0139802	21.4523	5.89647	5.78321	0.82029	0	1.2971
DN97044	3.70151	0.00315655	15.684	4.00652	11.1817	0.259177	0.160717	1.53685
DN79018	3.71133	0.000303581	30.7328	3.18735	29.4105	2.42186	0.703553	0.591444
DN70979	3.71317	0.00437947	41.2501	9.12175	39.3961	1.49214	0	4.13674
DN92039	3.74741	0.0417759	9.6866	4.43098	3.7122	1.06353	0	0
DN112624	3.75593	0.0392697	21.9209	7.27161	14.7208	2.56577	0	0
DN77666	3.76677	0.000591461	16.4433	3.96133	18.0546	0.371381	0.491299	1.42618
DN79266	3.80597	0.000460292	13.1808	8.32746	7.07743	0.56049	0.154473	1.0551
DN65565	3.8302	0.00280362	47.7745	38.8639	10.7815	3.03584	2.51006	0
DN71860	3.85045	0.0414399	21.7728	1.59167	4.1671	0.396011	0	1.07348
DN82327	3.8954	0.0498335	19.9356	3.68054	1.86444	0.221478	0.640922	0.375231
DN72820	3.93208	0.0394992	3.12204	2.57366	2.04387	0.0346848	0.344133	0
DN73393	4.00496	0.0163582	6.73921	6.04223	4.63205	0.455376	0	0.514336
DN86637	4.07887	0.0374751	3.51266	1.29867	4.03325	0.0525057	0.260473	0.0593038
DN58340	4.1053	0.0482833	19.7875	4.93968	6.11352	0.193662	0.320243	0.874943
DN85109	4.12014	0.022902	15.6687	2.4788	4.04957	0	0	1.0263
DN90286	4.143	1.9114e-07	15.0744	3.6083	8.83513	0.335851	0.388759	0.493135
DN34770	4.16766	0.0273056	1.85141	7.53667	6.05614	0.761035	0	0
DN7299	4.23387	0.013738	6.388	2.92063	4.3131	0.192134	0	0.434021
DN61085	4.25444	0.00109294	22.8941	14.0823	14.8936	0.451717	1.49394	0
DN60954	4.41917	0.0191807	5.9541	2.56172	2.68271	0.407913	0	0
DN82327	4.44295	0.0444608	5.96034	2.60386	2.09471	0	0.253215	0.0864769
DN79125	4.45823	0.001438	17.9986	2.13722	4.08918	0.37366	0.185367	0.253224
DN73936	4.46522	0.00497881	3.10282	1.99866	7.39076	0.454266	0	0
DN83710	4.47912	0.00631491	4.90686	0.639592	3.91833	0.0689573	0	0.272599
DN15403	4.56283	0.0205548	9.2462	3.52524	4.89924	0	0	0.643922
DN90694	4.58984	0.000238788	12.2902	3.68616	10.8872	0.161663	0.400994	0.273891
DN143799	4.62963	0.0243032	1.44029	2.32618	5.24349	0.296022	0	0
DN86669	4.72339	0.0235718	7.40126	2.39763	7.03044	0.119308	0.0986448	0.26951
DN79723	4.76938	0.00790418	6.01546	4.49307	7.12111	0	0	0.587969
DN82124	4.78428	0.000695187	56.7121	11.0395	5.70073	0	0.407209	1.66882
DN82874	4.83706	0.00287717	20.3557	8.62319	5.73329	0	0	1.02566
DN87676	4.85691	0.00639801	4.64848	1.84614	2.5636	0.0477698	0	0.215819
DN15112	4.89572	0.00287717	24.74	0.72821	5.9483	0	0	0.813741
DN73952	4.9153	0.000460292	6.51977	0.501511	4.71992	0.0846316	0.186598	0
DN91349	4.91571	0.0382129	3.53722	5.07811	3.51333	0	0.178101	0.121649
DN86201	4.94885	0.00302102	16.994	2.25855	4.51609	0.182628	0	0.412548
DN86982	4.96012	5.41796e-06	18.4625	3.02894	10.28	0	0.18254	0.623402
DN90599	4.96177	0.0528042	5.63266	7.85439	1.7596	0	0	0.435855
DN154877	4.98822	0.0417335	4.99695	0.7593	6.29623	0.0893058	0	0.201737
DN88319	5.00075	4.29044e-05	10.9523	6.83951	6.91541	0.620967	0	0
DN72282	5.06139	0.00720776	2.02418	49.3919	54.9843	0	0	3.00732
DN57508	5.18095	0.0163509	3.05632	1.70905	2.53822	0.150759	0	0
DN77527	5.23244	0.00548268	5.4686	2.67024	1.39434	0	0	0.213807
DN29679	5.24497	7.04009e-05	12.5236	3.38216	10.4277	0	0.478841	0
DN108003	5.31472	0.000769891	18.9469	1.50495	20.1042	0.121691	0	0.687237
DN87339	5.34713	0.0144485	5.35745	0.567389	1.77207	0.129542	0	0
DN13420	5.43065	0.000420446	18.6487	2.91396	3.52627	0.167556	0.0692684	0.18925
DN85194	5.53715	0.0163582	0.182588	2.66855	3.59346	0.112581	0	0
DN79513	5.58859	0.000769891	13.3849	2.26015	5.42518	0	0	0.347656
DN91060	5.70837	0.0125617	10.6097	5.69569	5.85514	0.300773	0	0
DN78168	5.72366	0.0136628	9.81261	2.49413	8.48875	0.268903	0	0
DN5874	5.78904	0.0122567	6.34703	0.880803	2.90314	0	0	0.135485
DN66042	5.8528	4.80388e-08	20.3615	6.46925	10.7714	0	0	0.544082
DN83772	5.89548	0.00548268	4.22117	2.45499	3.15653	0.117637	0	0
DN87380	5.91465	0.00751945	0	16.9376	86.4707	0	0	1.45592
DN86669	5.94216	0.0187481	15.8799	0.317817	3.89408	0.205592	0	0
DN81699	6.075	1.91183e-06	2.54719	7.47303	11.6272	0.267329	0	0
DN7577	6.08887	0.0524326	2.3889	0.999661	2.0162	0.0479013	0	0
DN82992	6.13265	0.00115946	10.1595	3.99121	0	0	0.139981	0
DN67578	6.15929	9.3783e-09	23.9804	10.7979	8.51786	0	0	0.516127
DN92403	6.20705	0	78.5849	12.6627	27.6658	0.594533	0	0.671509
DN101767	6.62519	0.00548268	0	7.50243	6.68973	0.113526	0	0
DN88474	6.67131	0	18.91	4.9901	4.75546	0	0.192166	0
DN82894	6.82753	0.00747441	4.36747	4.52264	2.86866	0	0	0.0751009
DN121931	7.54417	0.007539	31.689	0.206175	0.280686	0	0	0.100427
DN90003	10.1273	0.0335988	18.9583	5.87532	7.93144	0	0	0
DN89839	10.2826	0.0483268	0	9.97079	12.1651	0	0	0
DN75515	10.9124	0.0100107	53.8297	23.5383	21.4834	0	0	0
DN91349	10.9186	0.0237702	25.5297	2.06955	0	0	0	0
DN80553	11.1021	0.0122567	41.3735	0.322581	14.6021	0	0	0
DN90003	11.6518	0.007539	32.3757	21.4647	0	0	0	0

## Sheet: Root
Name	Log₂ fold change	FDR p-value	H1_12	H2_312	H3_5	L1_91	L2_101	L3_310
DN83994	-11.2037	0.0173644	0	0	0	16.8261	28.2508	104.146
DN84893	-11.1542	0.0335292	0	0	0	4.53761	0	18.7462
DN89905	-10.9741	0.0391376	0	0	0	152.917	95.5009	0
DN88180	-9.25899	1.46111e-06	0.417515	0	0	293.202	0	5.21198
DN83730	-9.12893	0.000351382	0	0.0442975	0	0	30.3739	2.11386
DN91246	-9.00709	0.000397391	0.339602	0	0	196.491	56.2629	0
DN92574	-8.84774	0.00671018	0	0	0	0	0	83.5905
DN19907	-8.79217	0.000580326	0.262958	0	0	79.1625	81.7295	0
DN88172	-8.3395	5.99671e-05	0.260567	0	0.274705	114.602	89.0138	0
DN41592	-7.95012	0.00703565	0.356498	0	0	77.0008	47.3473	0
DN88083	-7.89105	0.00824311	0	0	0.50531	111.572	52.5011	0
DN62654	-7.52104	0.0143868	0.147897	0	0	18.8688	18.7313	0.1477
DN89842	-7.36225	0.0198735	0	0.157528	0	0	19.501	15.9187
DN89518	-7.27153	0.000580326	1.41426	0	0	233.719	26.1415	0.470792
DN86517	-7.23018	1.37045e-06	1.94102	0	1.02317	279.859	177.398	0.646144
DN91872	-7.1776	0.000272797	0	0.236322	0	0	25.9584	12.6039
DN27025	-6.98877	0.000740037	0	0.822362	1.21845	289.297	0	13.8504
DN76803	-6.96577	0.0327977	0	0.144574	0	5.91211	17.5265	0.405825
DN16507	-6.94285	0.0194194	0	0.112223	0	2.47108	8.85378	7.03529
DN87394	-6.64806	0.000397391	0	0.417795	0	0	15.2154	32.9243
DN65733	-6.64564	1.46111e-06	1.43791	0	1.51593	79.9243	202.293	2.15399
DN85970	-6.57508	0.000568716	0	0	0.303237	0.321897	15.9991	13.5724
DN86620	-6.16593	0.000397391	0.403696	0	0.319199	27.6721	25.426	0.201579
DN90324	-6.01069	0.00278517	0.559813	0.398332	0.196729	0	26.0608	54.7885
DN88206	-5.96898	8.00823e-07	4.33138	2.81397	6.94884	603.183	292.013	2.82104
DN88083	-5.95105	0.0326202	0.443691	0	1.40329	120.165	0	10.6344
DN61912	-5.82499	0.0385369	0	0	0.529204	14.606	16.3233	3.75974
DN78395	-5.73101	0.0303417	0	0.200734	1.38795	90.506	0	2.44169
DN61667	-5.46233	0.0116099	0.976811	0	0	30.9214	14.2343	0.836149
DN77291	-5.42258	0.0385369	0.982936	0	0.414507	0	49.6613	8.04932
DN91219	-5.39264	0.000172692	1.00924	0.646307	2.7664	44.2753	130.999	2.21737
DN79148	-5.36779	0.0305427	0.41348	0	0	0.555286	3.3402	14.948
DN88018	-5.31666	0.000172692	1.82669	1.24069	1.22551	156.668	26.0342	1.49257
DN79922	-5.30745	0.0502414	0.70366	0	0.12364	12.4686	0	23.6583
DN70310	-5.29383	0.0116099	0.313937	0.502605	0.165485	18.0938	22.4592	0.627035
DN76746	-5.28076	0.0337354	0.571914	0	0	0	12.007	9.89995
DN63792	-5.2794	0.0231367	0.71418	2.03268	1.50586	181.965	0	5.23033
DN90501	-5.14156	0.0394605	0	0.258159	0.382501	12.1811	11.674	0.362331
DN90694	-5.08303	0.00920614	0.892513	0.952594	0.403259	36.8144	41.8981	0
DN90019	-5.06149	0.0481095	0.315944	0	0	0.707165	6.09952	4.2911
DN83797	-4.9983	0.0405207	1.13853	0	0	0.955621	24.4548	10.6594
DN31800	-4.99764	0.0163097	4.82532	5.40766	8.39376	622.099	0	25.5401
DN92067	-4.97048	0.0356351	0	0.304902	0.301172	0	10.1697	9.50969
DN87643	-4.96813	0.0211841	0	1.59749	1.97242	62.3952	53.7947	1.49473
DN92403	-4.94418	0.000740037	2.92847	2.53956	2.31552	65.1372	168.28	0.731141
DN89209	-4.87984	0.0112417	1.49164	0.857259	2.29837	1.41252	122.934	1.37506
DN86865	-4.85808	0.0525332	0	6.69519	4.0697	0.720022	296.536	5.78266
DN75243	-4.84074	0.0502414	0	1.0829	0.267412	17.032	20.8378	4.05298
DN90559	-4.83174	0.0321504	0.258686	1.9327	0.818165	36.188	53.6602	0.258341
DN91623	-4.64938	0.0491529	0.294124	0.78481	0	18.5977	11.125	0.146866
DN86781	-4.64433	0.0262539	1.75963	0	0.412245	19.9114	31.1868	3.12406
DN121596	-4.61844	0.0249249	8.69844	2.26439	3.69052	314.003	0	70.1303
DN38557	-4.60309	0.00671018	0.240591	0.770361	0.760934	33.4771	11.9688	0.64072
DN89943	-4.56912	0.0427316	1.18196	3.46918	3.42673	161.377	0	51.9366
DN92395	-4.54724	0.0265902	0.973107	0.377678	0	0.891028	18.411	12.5452
DN88036	-4.53068	0.00632024	4.88817	0	1.17122	51.2237	76.5116	8.21003
DN79592	-4.52677	0.0116099	3.20088	0	0	16.7712	35.5591	20.3421
DN89111	-4.4787	0.0147604	2.94919	0.196732	1.36028	59.2032	40.0648	0.276117
DN92395	-4.42229	0.0146361	0.441413	1.0993	1.24097	24.206	34.9534	1.17553
DN82855	-4.39082	0.0265773	0.997532	0	0.584253	2.60486	17.2245	12.9506
DN71175	-4.28792	0.0111703	0.588954	1.78103	1.65576	0.659116	38.8413	40.3875
DN89111	-4.25867	0.029187	0.232839	3.10641	1.10462	42.7346	46.4654	0.697583
DN88224	-4.19366	0.00824311	1.83472	6.96259	6.87739	90.1168	192.315	2.03586
DN90193	-4.13411	0.0116099	1.07934	3.96798	2.14937	97.3047	37.6846	1.0779
DN89111	-4.13307	0.0299971	0.437075	0.466498	0	1.79353	6.91534	7.95385
DN85894	-4.10404	0.000925049	11.7085	15.7458	13.5781	157.502	516.848	11.459
DN88211	-3.99304	0.0116099	9.71608	7.40724	2.92664	286.208	49.412	9.35657
DN86578	-3.94427	0.0054229	5.65706	6.84292	7.95199	97.9193	200.612	11.299
DN80365	-3.93208	0.0143868	1.62508	0	2.67696	8.63874	23.2241	32.4583
DN76053	-3.82219	0.0143868	3.11548	2.4939	5.7479	15.254	65.0521	81.2833
DN89040	-3.78948	0.0269879	14.1156	5.44042	0.826746	191.102	95.0244	5.09048
DN91878	-3.75376	0.00563605	5.57906	11.1649	13.6016	115.118	270.94	15.3219
DN90517	-3.71298	0.0245594	1.75108	4.13138	2.81771	64.5666	52.4943	1.01243
DN69046	-3.49778	0.0132711	14.0286	1.76153	4.63993	153.305	42.9355	42.0297
DN83454	-3.38443	0.0491529	4.62579	1.76993	2.85245	4.00474	9.79919	86.6395
DN84814	-3.34808	0.0198791	4.3513	15.8802	11.9864	108.861	210.348	9.53204
DN85963	-3.34697	0.0111703	22.8204	17.5367	29.592	205.078	461.967	19.3715
DN74647	-3.2567	0.0376668	3.76642	11.4569	5.162	79.771	115.323	4.3256
DN68149	-3.18527	0.0179299	28.276	14.2462	34.4391	52.6755	59.7565	612.824
DN92791	-2.98265	3.95938e-05	42.6699	40.0458	63.4444	307.103	474.44	376.758
DN66072	-2.94908	0.00294454	18.2434	8.654	7.47959	59.4355	147.653	53.5438
DN79524	-2.59663	0.0427316	8.73189	22.8332	20.4826	171.134	124.713	29.9758
DN93383	-2.57761	0.019656	11.8808	19.0209	28.4431	140.995	131.662	87.5039
DN108613	2.36724	0.01164	69.5412	49.2161	50.8872	17.9598	8.17595	8.03398
DN82727	2.61162	0.0265773	16.8376	21.9247	16.5339	3.60718	3.52397	2.1139
DN76845	2.79936	0.00671018	71.5605	59.5522	14.1519	8.01925	6.21372	7.63311
DN82327	2.85547	0.0220238	54.4001	35.8986	168.047	12.6017	16.719	5.2575
DN78483	3.1083	0.00361867	24.1116	20.6292	29.3725	5.20871	2.1242	1.6139
DN89672	3.21942	0.00172609	37.2395	139.711	47.006	2.98612	8.49804	14.0572
DN71890	3.53164	0.0231367	34.9948	69.81	96.1867	12.1221	1.99645	4.57654
DN86460	3.66311	0.0195317	29.6708	50.9175	14.5159	5.42574	0.929336	1.93668
DN77507	3.71029	0.000887922	293.092	2407.38	717.756	113.527	138.195	23.4569
DN53554	3.76629	0.0502414	7.81702	12.6218	10.8825	1.79452	0.480265	0.200169
DN80586	3.88308	0.00295515	25.8001	6.90514	5.9939	2.01853	0.241587	0.509048
DN3022	4.16393	0.019576	16.5859	34.5749	23.7697	0.580054	0.709666	3.1057
DN69596	4.25682	0.00135099	9.43671	14.5931	10.0814	0	0.890094	0.879584
DN124037	4.35287	0.0337354	6.58516	20.7955	1.43143	1.06366	0.464762	0
DN151508	4.38735	0.000397391	26.8821	130.728	25.7131	0.796944	2.43755	6.22265
DN91761	4.58259	0.0116099	22.2852	17.3924	16.901	2.56301	0	0
DN78782	4.60727	0.0118593	16.4222	4.24585	10.2159	0	1.11728	0
DN62813	4.63438	0.0375013	3.74579	1.92267	1.65799	0.320002	0	0
DN3022	4.6634	0.0231367	15.1111	98.3311	9.76417	1.09105	2.00227	1.94722
DN157134	4.81704	0.0300201	4.70784	3.25131	3.06555	0.309923	0	0.138281
DN82605	4.99016	0.0116099	1.56097	2.88253	2.24646	0	0	0.222698
DN69697	5.15431	0.0303841	2.71413	0.505261	2.46212	0	0	0.157587
DN136804	5.21976	0.000194685	17.4855	8.87913	1.58356	0	0.184569	0.576945
DN16821	5.36583	0.000145635	17.061	18.9378	78.9014	2.03664	0	0.908704
DN86636	5.37554	0.00687418	3.61082	4.38546	4.33179	0.278688	0	0.0621724
DN92159	5.60212	0.00652016	6.98232	3.07409	6.44101	0.0976766	0.179253	0
DN56627	5.71678	0.0316344	7.73526	0	5.6895	0.20132	0.0410508	0
DN86578	5.72792	0.00244037	6.42688	9.6191	3.27097	0.413363	0	0
DN61493	5.90208	0.0337354	6.42079	2.60415	7.58146	0.287428	0	0
DN60818	6.06371	1.46111e-06	75.6688	95.1204	151.168	0	4.39539	0
DN5060	6.06659	0.0394605	0	3.31965	24.2144	0.401632	0	0
DN64243	6.11292	0.00361867	1.07505	0.882628	25.9805	0.185095	0.169841	0
DN71125	6.37724	2.9028e-05	2.65354	2.58491	3.10834	0	0	0.105159
DN12011	6.40142	0.0261247	17.8443	80.3483	1.17578	1.24813	0	0
DN9702	6.40968	0.00652016	1.32719	1.72559	1.24656	0.0540108	0	0
DN140912	6.50204	0.00451341	3.19825	1.73387	4.97739	0	0	0.101396
DN118614	6.51305	1.50091e-05	6.88787	16.6793	9.60403	0.414432	0	0
DN17387	6.52226	2.10477e-05	0.818926	8.95905	113.532	0	0.700795	0.511146
DN82245	7.2021	0.0111703	2.09736	0.762058	1.22319	0.0249704	0	0
DN17562	7.2915	0.00920614	2.43936	5.56216	2.39636	0.0620445	0	0
DN159446	7.33894	0.000139389	26.1745	16.2272	0.273215	0	0	0.258808
DN139608	7.52863	0.0194644	0	3.94008	28.772	0.147548	0	0
DN170426	7.75985	0.0166869	0	13.2771	7.00645	0	0.0583302	0
DN77611	7.79058	0.000351382	5.7279	3.81074	0	0.0427351	0	0
DN73774	8.17629	0.00102127	1.59236	6.23168	42.6683	0.148505	0	0
DN91659	8.29679	0.00426804	35.3857	0	12.1243	0	0.086518	0
DN101924	8.57286	0.00172609	3.28153	21.6788	0	0	0	0.0565025
DN74336	9.04052	0	354.238	51.967	70.895	0	0	0.917441
DN128359	10.6516	0.0481095	9.14084	0	16.6974	0	0	0
DN3897	10.6702	0.029187	11.4356	1.84761	16.7568	0	0	0
DN84271	10.7125	0.0254915	10.295	2.78902	5.14468	0	0	0
DN101685	10.7603	0.023142	4.37019	9.57002	7.82447	0	0	0
DN79082	10.77	0.0230865	13.2571	8.26249	7.09021	0	0	0
