# Supplementary material for: Identification of Gene Biomarkers for Tigilanol Tiglate Content in Fontainea picrosperma
Source: Molecules. 2022 Jun 21;27(13):3980. doi: 10.3390/molecules27133980 (PMC9268252; doi:10.3390/molecules27133980)
Supplement: Supplementary file 1 [file molecules-27-03980-s001.zip › Mitu et al_Supp File 6.xlsx]

## Sheet: PRIMER DESIGN_RT-qPCR
Gene	Forward primer (5'-3')	Reverse primer (5'-3')	Tm (degC)	Product Size (Bp)
EF1α	CAGTCGTTGTTGACTTGCCG	CTAGGCTCTTTCCGTCTCTGC	57	181
PP2A	CACCGAATTCATTGGTGGCG	TAATCATGCGTCTCGCACGG	57	85
GAPDH	GAACAGCCGGTGAGAACCTG	TCTCTCTCTACCCAATCACCGT	57	120
CYP94C1	GTTCGGGTTGTGGATCCAGTT	ATCACAGCCGGTAAACCACC	57	83
R protein	CTGGCATGGAGGTCATTTTT	CCTCTCCACCAACTTGCATT	57	112
2-ARD	TGCTCCCAAGAAGGGAGACT	TCCAACCACATAGCAGCCAC	57	103
ERD-7.1	TAATCTCCGCATCCGATTTC	ATGGTGGGTCTGTTGCTAGG	59	150
